# Supplementary material for: The GAGA factor regulatory network: Identification of GAGA factor associated proteins
Source: PubMed Central journal article supplement (PMC5351981; doi:10.1371/journal.pone.0173602), 2017-03-15
Supplement: pone.0173602.s009.pdf [file pone.0173602.s009.pdf]

|                    | (1) | 1               | 10       | 20    | 30      | 40          | 50                | 60         | 70          | 83       |               |       |               |               |             |    |
|--------------------|-----|-----------------|----------|-------|---------|-------------|-------------------|------------|-------------|----------|---------------|-------|---------------|---------------|-------------|----|
| Ab PB 53-197 aa    | (1) | GSALSPATPPPSLNL | SHQQQQHQ | QH    | YALKW   | NDFQSS      | ILSSFRHLRDEED     | FVDVTLACDE | RSFTA       | HKVVL    | SACSPYFRRLLKA |       |               |               |             |    |
| GAF PC 1-131 aa    | (1) | -----           | MSL      | PMNSL | YSLT    | WGDYGT      | SLVSAIQLLRCHGDLVD | CTLAAGG    | RSFPA       | HKIVL    | CAASPFLLDLLKN |       |               |               |             |    |
| CP190 PA 1-131 aa  | (1) | -----           | MGEVK    | SVKVD | NWGVFFL | QKLQNF      | FNKTDYCDL         | TLQFRD     | NSQLKV      | HRLVL    | SACTDYFN      | VLEQT |               |               |             |    |
| Psq/BTB V 1-141 aa | (1) | -----           | MAAV     | VRGH  | QYFSL   | LRWNNYQNTMT | SVFQQ             | LREDLS     | FVDVTL      | SCFH     | GLKA          | HKVVL | SACSTYFQKLLLE |               |             |    |
| Mod(mdg4) 1-131 aa | (1) | -----           | MADDE    | QFSL  | LCWNN   | FNTNLS      | SAGFHES           | LCRGDLVD   | VSLAAEG     | QIVKA    | HRLVL         | SVCS  | PFRRKMFTQ     |               |             |    |
| Bab2 PA 194-313 aa | (1) | -----           | EG       | QQF   | CLR     | WNNYQSNL    | TNVFDELL          | QSES       | FVDVTL      | SC       | EGHS          | IKAH  | KMVL          | SACSPYFQALFYD |             |    |
| BtbVII PA 1-119 aa | (1) | -----           | MSV      | QQF   | CLR     | WNNHQ       | PNFISV            | CSSLHNGT   | LV          | DVTLAAEG | RQLQA         | HKIVL | SACSSYFQALFTT |               |             |    |
| Lola PA 1-120 aa   | (1) | -----           | MDDD     | QQF   | CLR     | WNNHQ       | STLISV            | FDTLLENET  | LV          | DCTLA    | AEGKFL        | KA    | HKVVL         | SACSPYFATLLQE |             |    |
| Ttk 1-131 aa       | (1) | -----           | MKMAS    | QR    | FCLR    | WNNHQ       | SLLSV             | FDQLLHAET  | FTD         | VTLAVEG  | QHLKA         | HKMVL | SACSPYFNTL    | FVS           |             |    |
| Lolal 1-127 aa     | (1) | -----           | M        | SSD   | QQF     | FLK         | WND               | FQTNM      | VTSFRHLRDEK | SFTD     | VTLACEG       | QTC   | KA            | HKMVL         | SACSPYFKALL | EE |

|                    | (84) | 84  | 90    | 100     | 110    | 120   | 130   | 140   | 158     |       |        |        |       |           |       |         |              |          |       |
|--------------------|------|-----|-------|---------|--------|-------|-------|-------|---------|-------|--------|--------|-------|-----------|-------|---------|--------------|----------|-------|
| Ab PB 53-197 aa    | (83) | NPC | -EHP  | IVILRDV | RCD    | DVENL | LSFMY | NGEVN | VSHEQLP | DFLKT | AHL    | LQIRGL | ADV   | NGGYPYSK  | ----- |         |              |          |       |
| GAF PC 1-131 aa    | (66) | TPC | -KHP  | VMLAG   | VNAN   | DLEA  | LEFVY | RGEV  | SVDHA   | QLPS  | LLQAA  | QCIN   | IQGLA | PQTVTKDDY | TTHS  | -----   |              |          |       |
| CP190 PA 1-131 aa  | (63) | CEI | VDDAL | IMPNE   | FQADV  | VVP   | IVNFM | YTG   | TEFEL   | KMYGK | LLRTA  | KEMN   | MTVL  | LKLL      | LEA   | HRR     | TMENVNR      | -----    |       |
| Psq/BTB V 1-141 aa | (67) | NPC | KHPT  | IILP    | ADIIFT | DLKTI | IDFVY | RGEI  | DVTE    | SELQ  | GLLRTA | EQLK   | IKGL  | CE        | TAEN  | ADDL    | NDAATATITVSE |          |       |
| Mod(mdg4) 1-131 aa | (64) | MPS | NTHA  | IVFL    | NNVSH  | SALKD | LIQF  | MYCGE | VNVKQ   | DALPA | FISTA  | ESLQ   | IKGL  | TD        | NDP   | PAPQPPQ | ESSP         | -----    |       |
| Bab2 PA 194-313 aa | (62) | NPC | -QH   | PII     | MRDVS  | WS    | DLKAL | VEFMY | KGEI    | NVCQD | QINP   | LLKVA  | ETLK  | IRGL      | AEV   | SAGR    | -----        |          |       |
| BtbVII PA 1-119 aa | (63) | NPC | -QH   | PIV     | ILKDV  | QYD   | DLKTM | VDFMY | YGEV    | NVSQE | QLPH   | ILKTA  | EMLK  | IKGL      | AE    | MP      | -----        |          |       |
| Lola PA 1-120 aa   | (64) | QYD | -KH   | PIF     | ILKDV  | KYQ   | ELRAM | MDYMY | RGEV    | NISQD | QLAAL  | LKAA   | ESLQ  | IKGL      | SD    | NRT     | -----        |          |       |
| Ttk 1-131 aa       | (65) | HPE | -KH   | PIV     | ILKDV  | PYS   | DMKSL | LD    | FMYR    | GEV   | SVDQ   | ERLTA  | FLRVA | ESLR      | IKGL  | TEV     | NDDK         | PSPAAAAA | ----- |
| Lolal 1-127 aa     | (65) | NPS | -KH   | PII     | ILKDV  | SYI   | HLQA  | ILEF  | MYA     | GEV   | NVSQE  | QLPA   | FLKTA | DR        | LKVK  | GLAE    | TPSS         | IKREG    | ----- |

CP190 BTB alignment with BTB domains of Ttk-group members

|                      |     | 1               | 10     | 20  | 30       | 40       | 50     | 60     | 70    | 81      | Section 1 |              |        |        |             |        |      |          |   |   |   |   |   |   |   |   |   |   |   |   |   |   |   |   |   |   |   |   |   |   |   |   |   |   |   |   |   |   |   |   |   |   |   |   |   |   |   |   |   |   |   |   |   |   |
|----------------------|-----|-----------------|--------|-----|----------|----------|--------|--------|-------|---------|-----------|--------------|--------|--------|-------------|--------|------|----------|---|---|---|---|---|---|---|---|---|---|---|---|---|---|---|---|---|---|---|---|---|---|---|---|---|---|---|---|---|---|---|---|---|---|---|---|---|---|---|---|---|---|---|---|---|---|
| Ab PB 53-197 aa      | (1) | GSALSPATPPPSLNL | SHQQQH | QH  | YALKW    | NDFQSSIL | SFRHLR | DEEDFV | DVTLA | CDERSFT | AHKVVL    | SACSPYFRRLLK |        |        |             |        |      |          |   |   |   |   |   |   |   |   |   |   |   |   |   |   |   |   |   |   |   |   |   |   |   |   |   |   |   |   |   |   |   |   |   |   |   |   |   |   |   |   |   |   |   |   |   |   |
| CG41099 PB 33-164 aa | (1) | -----           | -----  | SE  | NEESGLSS | FLSRLS   | SLTVAS | LF     | DKN   | TYADIY  | IRSQTR    | VFP          | AHKIVL | HARSEK | WGNDLL      |        |      |          |   |   |   |   |   |   |   |   |   |   |   |   |   |   |   |   |   |   |   |   |   |   |   |   |   |   |   |   |   |   |   |   |   |   |   |   |   |   |   |   |   |   |   |   |   |   |
| GAF PC 1-131 aa      | (1) | -----           | -----  | MS  | LPMN     | SLY      | SLTW   | G      | Y     | GTSLV   | SAIQ      | LLRCHG       | DL     | VD     | CTLAAGGRSFP | AHKIVL | CAAS | PFLLDLLK |   |   |   |   |   |   |   |   |   |   |   |   |   |   |   |   |   |   |   |   |   |   |   |   |   |   |   |   |   |   |   |   |   |   |   |   |   |   |   |   |   |   |   |   |   |   |
| Lolal 1-127 aa       | (1) | -----           | -----  | MM  | SSD      | QQF      | FLK    | W      | NDF   | Q       | T         | N            | M      | V      | S           | F      | R    | L        | R | D | E | K | S | F | T | D | V | T | L | A | C | E | G | Q | T | C | K | A | H | K | M | V | L | S | A | C | S | P | Y | F | K | A | L | L | E |   |   |   |   |   |   |   |   |   |
| Bab2 PA 194-313 aa   | (1) | -----           | -----  | EG  | Q        | F        | C      | L      | R     | W       | N         | Y            | Q      | S      | N           | L      | T    | N        | V | F | D | E | L | L | Q | S | E | S | F | V | D | V | T | L | S | C | E | G | H | S | I | K | A | H | K | M | V | L | S | A | C | S | P | Y | F | Q | A | L | F | Y |   |   |   |   |
| Psq/BTB V 1-141 aa   | (1) | -----           | -----  | MAA | V        | R        | G      | H      | Q     | Y       | F         | S            | L      | R      | W           | N      | Y    | Q        | N | T | M | T | S | V | F | Q | Q | L | R | E | D | L | S | F | V | D | V | T | L | S | C | E | H | G | S | L | K | A | H | K | V | V | L | S | A | C | S | T | Y | F | Q | K | L | L |
| Mod(mdg4) 1-131 aa   | (1) | -----           | -----  | MAD | D        | E        | Q      | F      | S     | L       | C         | W            | N      | N      | F           | N      | T    | N        | L | S | A | G | F | H | E | S | L | C | R | G | D | L | V | D | V | S | L | A | A | E | G | Q | I | V | K | A | H | R | L | V | L | S | V | C | S | P | F | F | R | K | M | F | T |   |
| BtbVII PA 1-119 aa   | (1) | -----           | -----  | MSV | Q        | F        | C      | L      | R     | W       | N         | N            | H      | Q      | P           | N      | F    | I        | S | V | C | S | S | L | L | H | N | G | T | L | V | D | V | T | L | A | A | E | G | R | L | Q | A | H | K | I | V | L | S | A | C | S | S | Y | F | Q | A | L | F | T |   |   |   |   |
| Lola PA 1-120 aa     | (1) | -----           | -----  | MDD | D        | Q        | F      | C      | L     | R       | W         | N            | N      | H      | Q           | S      | T    | L        | S | V | F | D | T | L | L | E | N | E | T | L | V | D | C | T | L | A | A | E | G | K | F | L | K | A | H | K | V | V | L | S | A | C | S | P | Y | F | A | T | L | L | Q |   |   |   |
| Ttk 1-131 aa         | (1) | -----           | -----  | MK  | M        | A        | S      | Q      | R     | F       | C         | L            | R      | W      | N           | N      | H    | Q        | S | N | L | S | V | F | D | Q | L | L | H | A | E | T | F | T | D | V | T | L | A | V | E | G | Q | H | L | K | A | H | K | M | V | L | S | A | C | S | P | Y | F | N | T | L | F | V |

  

|                      |      | 82   | 90   | 100  | 110 | 120 | 130  | 140 | 158 | Section 2 |     |   |     |   |     |   |   |   |   |   |   |   |   |   |   |   |   |   |   |   |   |   |   |   |   |   |   |   |   |       |   |   |   |   |   |   |   |   |   |   |   |   |   |   |   |   |   |   |       |       |   |       |   |   |       |   |   |   |   |   |       |       |   |   |   |   |
|----------------------|------|------|------|------|-----|-----|------|-----|-----|-----------|-----|---|-----|---|-----|---|---|---|---|---|---|---|---|---|---|---|---|---|---|---|---|---|---|---|---|---|---|---|---|-------|---|---|---|---|---|---|---|---|---|---|---|---|---|---|---|---|---|---|-------|-------|---|-------|---|---|-------|---|---|---|---|---|-------|-------|---|---|---|---|
| Ab PB 53-197 aa      | (82) | ANPC | -EHP | IVIL | RDV | RCD | DVEN | LLS | FMY | N         | GEV | N | SHE | - | QLP | D | F | L | K | T | A | H | L | L | Q | I | R | G | L | A | D | V | N | G | G | P | Y | S | K | ----- |   |   |   |   |   |   |   |   |   |   |   |   |   |   |   |   |   |   |       |       |   |       |   |   |       |   |   |   |   |   |       |       |   |   |   |   |
| CG41099 PB 33-164 aa | (60) | SN   | IQ   | --   | QLD | -WS | DL   | N   | E   | D         | V   | V | L   | S | L   | R | W | I | Y | T | D | L | I | D | L | Q | N | D | G | L | A | D | L | L | K | A | A | H | R | F     | G | L | P | S | L | L | G | I | C | E | R | A | L | V | T | S | V | G | V     | R     | S | C     | I | R | F     | Y | C |   |   |   |       |       |   |   |   |   |
| GAF PC 1-131 aa      | (65) | NT   | PC   | -K   | HP  | V   | V    | M   | L   | A         | G   | V | N   | A | N   | D | L | E | A | L | L | E | F | V | Y | R | G | E | V | S | D | H | A | - | Q | L | P | S | L | L     | Q | A | A | Q | C | L | N | I | Q | G | L | A | P | Q | T | V | T | K | D     | D     | Y | T     | H | S | ----- |   |   |   |   |   |       |       |   |   |   |   |
| Lolal 1-127 aa       | (64) | EN   | PS   | -K   | HP  | I   | I    | L   | K   | D         | V   | S | Y   | I | H   | L | Q | A | I | L | E | F | M | Y | A | G | E | V | N | S | Q | E | - | Q | L | P | A | F | L | K     | T | A | D | R | L | K | V | K | G | L | A | E | T | P | S | S | I | K | R     | E     | G | ----- |   |   |       |   |   |   |   |   |       |       |   |   |   |   |
| Bab2 PA 194-313 aa   | (61) | DN   | PC   | -Q   | HP  | I   | I    | M   | R   | D         | V   | S | W   | S | D   | L | K | A | L | V | E | F | M | Y | K | G | E | I | N | V | C | Q | D | - | Q | I | N | P | L | L     | K | V | A | E | T | L | K | I | R | G | L | A | E | V | S | A | G | R | ----- |       |   |       |   |   |       |   |   |   |   |   |       |       |   |   |   |   |
| Psq/BTB V 1-141 aa   | (66) | EN   | PC   | K    | H   | P   | T    | I   | I   | L         | P   | A | D   | I | I   | F | T | D | L | K | T | I | I | D | F | V | Y | R | G | E | I | D | V | T | E | S | - | E | L | Q     | G | L | L | R | T | A | E | Q | L | K | I | K | G | L | C | E | T | A | E     | N     | A | D     | D | L | N     | D | A | A | T | A | T     | I     | T | V | S | E |
| Mod(mdg4) 1-131 aa   | (63) | Q    | M    | P    | S   | N   | T    | H   | A   | I         | V   | F | L   | N | N   | V | S | H | S | A | L | K | D | L | I | Q | F | M | Y | C | G | E | V | N | K | Q | D | - | A | L     | P | A | F | I | S | T | A | E | S | L | Q | I | K | G | L | T | D | N | D     | P     | A | P     | Q | P | P     | Q | E | S | S | P | ----- |       |   |   |   |   |
| BtbVII PA 1-119 aa   | (62) | T    | N    | P    | C   | -Q  | HP   | I   | V   | I         | L   | K | D   | V | Q   | Y | D | D | L | K | T | M | V | D | F | M | Y | Y | G | E | V | N | S | Q | E | - | Q | L | P | H     | I | L | K | T | A | E | M | L | K | I | K | G | L | A | E | M | P | T | ----- |       |   |       |   |   |       |   |   |   |   |   |       |       |   |   |   |   |
| Lola PA 1-120 aa     | (63) | E    | Q    | Y    | D   | -K  | HP   | I   | F   | I         | L   | K | D   | V | K   | Y | Q | E | L | R | A | M | M | D | Y | M | Y | R | G | E | V | N | I | S | Q | D | - | Q | L | A     | A | L | L | K | A | A | E | S | L | Q | I | K | G | L | S | D | N | R | T     | ----- |   |       |   |   |       |   |   |   |   |   |       |       |   |   |   |   |
| Ttk 1-131 aa         | (64) | S    | H    | P    | E   | -K  | HP   | I   | V   | I         | L   | K | D   | V | P   | Y | S | D | M | K | S | L | L | D | F | M | Y | R | G | E | V | S | V | D | Q | E | - | R | L | T     | A | F | L | R | V | A | E | S | L | R | I | K | G | L | T | E | V | N | D     | D     | K | P     | S | P | A     | A | A | A | A | A | A     | ----- |   |   |   |   |

CG41099 BTB alignment with BTB domains of Ttk-group members
