# Supplementary material for: The GAGA factor regulatory network: Identification of GAGA factor associated proteins
Source: PLoS One. 2017 Mar 15;12(3):e0173602. doi: 10.1371/journal.pone.0173602 (PMC5351981; doi:10.1371/journal.pone.0173602)
Supplement: S3 File — (XLSX) [file pone.0173602.s003.xlsx]

## Sheet: present in at least one GAF IP
		Peptide count	Peptide count	Spectral count	Spectral count	Seqcov	Seqcov	Peptide count	Peptide count	Spectral count	Spectral count	Seqcov	Seqcov	Peptide count	Peptide count	Spectral count	Spectral count	Seqcov	Seqcov
Gene names (ORF )	description	GAF IP 1	Mock 1	GAF IP 1	Mock 1	GAF IP 1	Mock 1	GAF IP 2	Mock 2	GAF IP 2	Mock 2	GAF IP 2	Mock 2	GAF IP 3	Mock 3	GAF IP 3	Mock 3	GAF IP 3	Mock 3	P-value	Gene names (ORF )
CG4264	Heat shock 70 kDa protein cognate 4 OS=Drosophila melanogaster GN=Hsc70-4 PE=1 SV=3	95	22	330	60	0.687	0.315	133	14	559	28	0.817	0.141	146	37	678	316	0.68	0.309	0.00592256	CG4264
CG11064	Apolipophorins OS=Drosophila melanogaster GN=Rfabg PE=1 SV=2	141	2	274	7	0.381	0.009	174	20	270	29	0.397	0.046	129	29	392	99	0.277	0.068	0.00132033	CG11064
CG1242	Heat shock protein 83 OS=Drosophila melanogaster GN=Hsp83 PE=1 SV=1	94	0	393	0	0.647	0	155	15	368	29	0.66	0.1	98	10	351	32	0.53	0.113	0.0136365	CG1242
CG8280	Elongation factor 1-alpha 1 OS=Drosophila melanogaster GN=Ef1alpha48D PE=1 SV=2	55	12	1169	205	0.667	0.292	199	13	939	36	0.806	0.136	95	18	579	150	0.629	0.279	0.0701841	CG8280
CG7507	Dynein heavy chain, cytoplasmic OS=Drosophila melanogaster GN=Dhc64C PE=2 SV=2	95	0	113	0	0.261	0	217	9	353	10	0.384	0.018	95	5	204	10	0.205	0.01	0.0418787	CG7507
CG11888	26S proteasome non-ATPase regulatory subunit 1 OS=Drosophila melanogaster GN=Rpn2 PE=1 SV=1	77	2	194	5	0.554	0.025	140	10	362	13	0.698	0.065	90	7	341	23	0.459	0.068	0.018044	CG11888
CG9277	Tubulin beta-1 chain OS=Drosophila melanogaster GN=betaTub56D PE=1 SV=2	67	11	1607	49	0.756	0.362	169	19	769	46	0.826	0.183	88	16	799	234	0.685	0.204	0.0478768	CG9277
CG7961	Alpha-coatomer protein, isoform A OS=Drosophila melanogaster GN=alphaCop PE=1 SV=1	46	2	66	4	0.337	0.017	118	11	206	14	0.588	0.071	82	9	293	35	0.379	0.074	0.0335727	CG7961
CG11856	Nup358 OS=Drosophila melanogaster GN=Nup358 PE=1 SV=2	78	0	108	0	0.334	0	95	12	189	19	0.346	0.034	72	12	178	32	0.188	0.041	0.00101093	CG11856
CG10811	Eukaryotic translation initiation factor 4G, isoform A OS=Drosophila melanogaster GN=eIF4G PE=1 SV=3	80	0	146	0	0.453	0	99	8	169	13	0.438	0.033	68	9	152	39	0.352	0.052	0.0042773	CG10811
CG8863	DnaJ-like-2, isoform A OS=Drosophila melanogaster GN=Droj2 PE=2 SV=1	59	4	463	10	0.777	0.129	76	2	190	2	0.739	0.032	68	4	335	11	0.571	0.122	0.00255458	CG8863
CG8977	T-complex protein 1 subunit gamma OS=Drosophila melanogaster GN=Cctgamma PE=2 SV=2	61	0	179	0	0.717	0	87	11	226	18	0.665	0.16	67	11	269	31	0.572	0.189	0.0030813	CG8977
CG8308	Tubulin alpha-4 chain OS=Drosophila melanogaster GN=alphaTub67C PE=1 SV=1	51	0	337	0	0.682	0	79	6	346	9	0.645	0.113	66	6	229	49	0.511	0.13	0.00648681	CG8308
CG7762	26S proteasome regulatory complex subunit p97 OS=Drosophila melanogaster GN=Rpn1 PE=1 SV=2	64	5	187	18	0.511	0.066	135	6	437	12	0.645	0.042	66	5	177	17	0.387	0.036	0.0353781	CG7762
CG18740	Brahma associated protein 155 kDa OS=Drosophila melanogaster GN=mor PE=2 SV=3	53	0	115	0	0.452	0	104	16	179	48	0.476	0.099	65	13	152	55	0.334	0.071	0.0211322	CG18740
CG8625	Chromatin-remodeling complex ATPase chain Iswi OS=Drosophila melanogaster GN=Iswi PE=1 SV=1	57	2	103	3	0.42	0.023	102	23	166	52	0.489	0.126	65	12	143	61	0.384	0.098	0.0154123	CG8625
CG6699	Coatomer subunit beta' OS=Drosophila melanogaster GN=beta'Cop PE=2 SV=2	38	0	69	0	0.396	0	93	11	175	22	0.534	0.104	64	10	194	47	0.406	0.093	0.030681	CG6699
CG14648	Growl, isoform A OS=Drosophila melanogaster GN=growl PE=1 SV=1	48	4	268	13	0.528	0.073	64	4	117	13	0.613	0.044	60	10	205	18	0.517	0.174	0.00177808	CG14648
CG33261	Isoform B of Transcription factor GAGA OS=Drosophila melanogaster GN=Trl	144	3	1331	14	0.846	0.116	96	0	219	0	0.463	0	60	0	183	0	0.408	0	0.0276	CG33261
CG5394	Bifunctional aminoacyl-tRNA synthetase OS=Drosophila melanogaster GN=Aats-glupro PE=1 SV=2	71	0	108	0	0.368	0	118	5	183	5	0.53	0.026	59	7	119	13	0.303	0.036	0.0234551	CG5394
CG12051	Actin-42A OS=Drosophila melanogaster GN=Act42A PE=1 SV=3	23	4	66	4	0.511	0.09	73	25	526	44	0.697	0.346	56	16	366	90	0.564	0.293	0.0607507	CG12051
CG4027	Actin-5C OS=Drosophila melanogaster GN=Act5C PE=1 SV=4	23	4	80	4	0.511	0.09	83	25	535	43	0.702	0.346	56	16	366	90	0.564	0.293	0.0712977	CG4027
CG11397	Condensin subunit SMC4 OS=Drosophila melanogaster GN=glu PE=2 SV=1	43	0	71	0	0.337	0	77	14	115	17	0.465	0.078	55	6	100	15	0.326	0.037	0.0113608	CG11397
CG5374	T-complex protein 1 subunit alpha OS=Drosophila melanogaster GN=T-cp1 PE=2 SV=2	41	0	126	0	0.68	0	82	8	193	10	0.686	0.115	55	4	136	9	0.533	0.065	0.0199866	CG5374
CG8231	GH13725p OS=Drosophila melanogaster GN=Tcp-1zeta PE=2 SV=1	52	4	168	13	0.583	0.098	63	7	229	13	0.61	0.096	54	8	179	27	0.402	0.128	0.000987024	CG8231
CG9359	Tubulin beta-2 chain OS=Drosophila melanogaster GN=betaTub85D PE=1 SV=1	36	4	722	36	0.446	0.094	65	8	395	22	0.493	0.07	54	8	337	185	0.39	0.105	0.0154559	CG9359
CG11375	Polybromo OS=Drosophila melanogaster GN=polybromo PE=2 SV=1	51	0	73	0	0.378	0	80	11	130	24	0.388	0.052	54	4	127	18	0.236	0.027	0.00841185	CG11375
CG3455	Rpt4 OS=Drosophila melanogaster GN=Rpt4 PE=1 SV=2	35	9	187	37	0.651	0.269	59	5	163	15	0.754	0.113	53	4	177	12	0.618	0.085	0.0114951	CG3455
CG1100	GH11341p OS=Drosophila melanogaster GN=Rpn5 PE=1 SV=1	60	0	128	0	0.639	0	62	10	136	15	0.546	0.131	52	6	144	18	0.46	0.122	0.00011988	CG1100
CG1913	Tubulin alpha-1 chain OS=Drosophila melanogaster GN=alphaTub84B PE=2 SV=1	57	8	993	20	0.82	0.247	131	22	838	41	0.844	0.24	51	12	232	109	0.453	0.16	0.0608931	CG1913
CG2512	Tubulin alpha-3 chain OS=Drosophila melanogaster GN=alphaTub84D PE=1 SV=1	56	8	992	20	0.773	0.247	127	22	831	41	0.776	0.24	51	12	232	109	0.453	0.16	0.0585555	CG2512
CG32346	Isoform B of Nucleosome-remodeling factor subunit NURF301 OS=Drosophila melanogaster GN=E(bx)	47	2	70	3	0.213	0.017	73	9	109	25	0.284	0.022	51	6	101	11	0.181	0.019	0.00945425	CG32346
CG32346,	Nucleosome-remodeling factor subunit NURF301 OS=Drosophila melanogaster GN=E(bx) PE=1 SV=2	47	2	70	3	0.211	0.017	73	9	109	25	0.284	0.022	51	6	101	11	0.181	0.019	0.00945425	CG32346,
CG11471	Isoleucyl-tRNA synthetase, isoform A OS=Drosophila melanogaster GN=Aats-ile PE=1 SV=1	51	6	65	11	0.386	0.058	67	5	99	7	0.414	0.028	51	4	100	16	0.265	0.033	0.00498086	CG11471
CG7033	CG7033, isoform C OS=Drosophila melanogaster GN=CG7033 PE=3 SV=1	50	9	125	17	0.653	0.229	48	0	98	0	0.636	0	51	3	141	14	0.54	0.054	0.00074295	CG7033
CG4954	Eukaryotic translation initiation factor 3 subunit C OS=Drosophila melanogaster GN=eIF3-S8 PE=1 SV=1	43	0	72	0	0.408	0	86	8	168	10	0.495	0.058	50	4	135	7	0.289	0.041	0.0245289	CG4954
CG7070	Pyruvate kinase OS=Drosophila melanogaster GN=PyK PE=2 SV=2	38	2	81	6	0.565	0.06	84	7	200	10	0.692	0.073	49	4	170	19	0.471	0.056	0.0306882	CG7070
CG1873	Elongation factor 1-alpha 2 OS=Drosophila melanogaster GN=Ef1alpha100E PE=1 SV=2	28	8	874	194	0.381	0.175	65	10	358	31	0.442	0.082	48	11	242	106	0.361	0.139	0.0360896	CG1873
CG1341	26S proteasome regulatory complex subunit p48B OS=Drosophila melanogaster GN=Rpt1 PE=1 SV=1	48	3	245	7	0.647	0.099	72	5	181	17	0.711	0.062	48	10	131	33	0.67	0.173	0.00962773	CG1341
CG4147	Heat shock 70 kDa protein cognate 3 OS=Drosophila melanogaster GN=Hsc70-3 PE=2 SV=2	45	9	123	25	0.488	0.152	58	15	129	20	0.465	0.204	47	9	207	28	0.442	0.152	0.00179269	CG4147
CG6223	Coatomer subunit beta OS=Drosophila melanogaster GN=betaCop PE=1 SV=2	45	0	115	0	0.428	0	83	3	203	3	0.461	0.031	47	8	140	16	0.337	0.073	0.0216091	CG6223
CG8571	Smallminded, isoform A OS=Drosophila melanogaster GN=smid PE=1 SV=1	50	0	176	0	0.475	0	121	11	287	44	0.606	0.083	47	6	120	22	0.382	0.05	0.0534488	CG8571
CG1616	DNA replication licensing factor MCM4 OS=Drosophila melanogaster GN=dpa PE=1 SV=2	53	3	89	13	0.575	0.035	70	5	120	7	0.658	0.046	47	3	120	6	0.371	0.027	0.00788632	CG1616
CG6779	40S ribosomal protein S3 OS=Drosophila melanogaster GN=RpS3 PE=1 SV=1	38	7	191	26	0.642	0.297	56	9	126	12	0.768	0.191	46	19	203	81	0.785	0.496	0.00361614	CG6779
CG42641	Probable 26S proteasome non-ATPase regulatory subunit 3 OS=Drosophila melanogaster GN=Rpn3 PE=1 SV=1	47	7	85	14	0.595	0.217	77	7	169	8	0.66	0.16	46	7	105	16	0.504	0.15	0.0197345	CG42641
CG6958	LP09464p OS=Drosophila melanogaster GN=Nup133 PE=2 SV=2	38	0	67	0	0.359	0	95	10	210	20	0.498	0.07	46	4	174	10	0.289	0.033	0.0435997	CG6958
CG6743	BcDNA.LD18761 OS=Drosophila melanogaster GN=Nup107 PE=1 SV=1	39	4	97	11	0.488	0.062	90	2	150	2	0.621	0.018	46	3	111	11	0.375	0.032	0.0369476	CG6743
CG9805	Eukaryotic translation initiation factor 3 subunit A OS=Drosophila melanogaster GN=eIF3-S10 PE=1 SV=1	51	5	90	9	0.377	0.047	75	3	116	5	0.399	0.027	46	3	101	9	0.295	0.024	0.0130785	CG9805
CG4916	Putative ATP-dependent RNA helicase me31b OS=Drosophila melanogaster GN=me31B PE=1 SV=3	27	0	38	0	0.545	0	78	2	179	4	0.704	0.037	46	0	127	0	0.351	0	0.0394773	CG4916
CG10067	Actin 57B, isoform C OS=Drosophila melanogaster GN=Act57B PE=3 SV=1	16	0	31	0	0.411	0	50	18	137	35	0.633	0.225	45	13	198	79	0.558	0.258	0.055807	CG10067
CG5942	Isoform C of ATP-dependent helicase brm OS=Drosophila melanogaster GN=brm	33	0	55	0	0.245	0	63	11	112	11	0.248	0.047	45	5	97	11	0.187	0.032	0.0147494	CG5942
CG6476	Isoform C of Eukaryotic translation initiation factor 2 subunit 3 OS=Drosophila melanogaster GN=Su(var)3-9	32	4	61	10	0.499	0.137	59	0	102	0	0.617	0	45	5	88	18	0.442	0.103	0.0142358	CG6476
CG12225	Transcription elongation factor SPT6 OS=Drosophila melanogaster GN=Spt6 PE=1 SV=1	8	0	8	0	0.056	0	88	7	130	8	0.328	0.037	44	4	88	6	0.2	0.015	0.101671	CG12225
CG18290	Actin-87E OS=Drosophila melanogaster GN=Act87E PE=1 SV=1	16	0	31	0	0.394	0	48	18	135	35	0.569	0.215	43	13	195	78	0.497	0.234	0.0542503	CG18290
CG6841	CG6841 OS=Drosophila melanogaster GN=CG6841 PE=1 SV=2	47	5	78	9	0.441	0.064	84	8	158	12	0.584	0.045	43	8	102	26	0.35	0.079	0.0294426	CG6841
CG16916	26S proteasome regulatory complex subunit p48A OS=Drosophila melanogaster GN=Rpt3 PE=1 SV=1	57	2	365	3	0.738	0.051	67	5	149	6	0.881	0.068	43	6	134	20	0.47	0.082	0.00784496	CG16916
CG5178	Actin, indirect flight muscle OS=Drosophila melanogaster GN=Act88F PE=1 SV=1	14	0	28	0	0.25	0	38	18	82	35	0.566	0.215	42	13	193	78	0.471	0.234	0.0621558	CG5178
CG1119	Replication factor C subunit 1 OS=Drosophila melanogaster GN=Gnf1 PE=1 SV=2	65	5	130	8	0.44	0.065	82	14	137	24	0.447	0.109	42	8	112	35	0.312	0.083	0.0187241	CG1119
CG10212	SMC2 OS=Drosophila melanogaster GN=SMC2 PE=2 SV=1	47	0	65	0	0.465	0	51	4	82	4	0.385	0.02	42	6	68	20	0.299	0.046	0.000173737	CG10212
CG4738	Nuclear pore complex protein Nup160 homolog OS=Drosophila melanogaster GN=Nup160 PE=1 SV=1	46	0	95	0	0.392	0	69	10	107	17	0.315	0.045	42	5	90	11	0.21	0.025	0.0104865	CG4738
CG1782	Ubiquitin-activating enzyme E1 OS=Drosophila melanogaster GN=Uba1 PE=1 SV=1	60	0	161	0	0.608	0	86	10	179	13	0.509	0.066	42	2	88	9	0.27	0.015	0.0190336	CG1782
CG1710	Host cell factor OS=Drosophila melanogaster GN=Hcf PE=1 SV=2	54	0	94	0	0.41	0	68	17	110	27	0.452	0.094	41	15	85	35	0.255	0.106	0.00657157	CG1710
CG6944	Lamin Dm0 OS=Drosophila melanogaster GN=Lam PE=1 SV=4	61	4	112	10	0.574	0.098	41	13	81	28	0.523	0.117	41	15	89	82	0.447	0.207	0.00813012	CG6944
CG8258	CG8258 OS=Drosophila melanogaster GN=CG8258 PE=2 SV=1	46	8	128	17	0.626	0.189	73	13	151	24	0.674	0.15	41	8	122	28	0.52	0.114	0.0223559	CG8258
CG5000	LP04448p OS=Drosophila melanogaster GN=msps PE=1 SV=3	39	0	57	0	0.245	0	67	5	113	7	0.326	0.022	41	4	82	10	0.206	0.018	0.0166346	CG5000
CG4978	DNA replication licensing factor Mcm7 OS=Drosophila melanogaster GN=Mcm7 PE=1 SV=1	46	3	92	6	0.56	0.053	55	2	87	3	0.526	0.021	41	0	87	0	0.467	0	0.00302326	CG4978
CG31671	Tho2, isoform B OS=Drosophila melanogaster GN=tho2 PE=4 SV=1	45	0	71	0	0.285	0	56	8	84	9	0.294	0.029	40	5	81	13	0.227	0.037	0.00217172	CG31671
CG4466	Heat shock protein 27 OS=Drosophila melanogaster GN=Hsp27 PE=1 SV=2	27	6	278	62	0.69	0.296	40	6	339	14	0.714	0.174	40	5	252	38	0.535	0.192	0.00986444	CG4466
CG5949	DNA polymerase delta catalytic subunit OS=Drosophila melanogaster GN=DNApol-delta PE=1 SV=2	38	0	71	0	0.315	0	64	2	103	4	0.436	0.017	40	4	90	9	0.284	0.03	0.015159	CG5949
CG10988	Gamma-tubulin complex component 3 homolog OS=Drosophila melanogaster GN=l(1)dd4 PE=1 SV=2	39	0	63	0	0.423	0	57	4	84	11	0.42	0.027	40	0	95	0	0.289	0	0.00682679	CG10988
CG34412	LD15160p OS=Drosophila melanogaster GN=tlk PE=2 SV=1	34	0	92	0	0.308	0	35	0	66	0	0.263	0	40	0	88	0	0.241	0	0.00129952	CG34412
CG9088	Lysine-specific demethylase lid OS=Drosophila melanogaster GN=lid PE=1 SV=1	49	0	70	0	0.331	0	71	4	118	6	0.301	0.025	40	0	76	0	0.243	0	0.0139237	CG9088
CG9373	Rumpelstiltskin OS=Drosophila melanogaster GN=rump PE=1 SV=1	21	0	52	0	0.255	0	30	6	46	8	0.297	0.054	39	8	99	24	0.324	0.111	0.0121987	CG9373
CG1489	26S protease regulatory subunit 8 OS=Drosophila melanogaster GN=Pros45 PE=1 SV=2	33	4	93	12	0.516	0.126	64	5	155	9	0.723	0.121	39	3	141	6	0.516	0.054	0.0242152	CG1489
CG8351	LD47396p OS=Drosophila melanogaster GN=Tcp-1eta PE=2 SV=2	52	2	143	5	0.757	0.048	67	3	120	4	0.724	0.037	39	3	108	14	0.445	0.057	0.0125139	CG8351
CG7478	Actin, larval muscle OS=Drosophila melanogaster GN=Act79B PE=2 SV=2	15	0	30	0	0.319	0	46	18	131	35	0.543	0.215	38	12	170	71	0.463	0.202	0.0578238	CG7478
CG9281	CG9281, isoform B OS=Drosophila melanogaster GN=CG9281 PE=1 SV=1	57	10	292	23	0.538	0.177	76	19	212	40	0.507	0.16	38	8	238	62	0.37	0.103	0.0226107	CG9281
CG10149	26S proteasome regulatory complex subunit p42B OS=Drosophila melanogaster GN=Rpn6 PE=1 SV=1	53	7	104	16	0.699	0.13	46	4	91	8	0.571	0.045	38	6	100	30	0.491	0.123	0.00464925	CG10149
CG3210	Dynamin related protein 1 OS=Drosophila melanogaster GN=Drp1 PE=2 SV=1	53	5	102	8	0.51	0.072	65	4	102	8	0.578	0.039	38	5	101	31	0.388	0.084	0.0129913	CG3210
CG4878	Eukaryotic translation initiation factor 3 subunit B OS=Drosophila melanogaster GN=eIF3-S9 PE=1 SV=1	34	4	74	10	0.417	0.061	64	10	93	12	0.481	0.097	38	4	84	8	0.328	0.049	0.0236585	CG4878
CG8184	CG8184 OS=Drosophila melanogaster GN=CG8184 PE=1 SV=2	9	0	11	0	0.041	0	60	0	86	0	0.15	0	38	0	61	0	0.09	0	0.0685344	CG8184
CG1453	Kinesin-like protein Klp10A OS=Drosophila melanogaster GN=Klp10A PE=1 SV=1	44	0	153	0	0.528	0	52	5	77	7	0.524	0.053	37	4	95	17	0.352	0.037	0.00292068	CG1453
CG17566	Tubulin gamma-2 chain OS=Drosophila melanogaster GN=gammaTub37C PE=1 SV=3	41	5	102	11	0.7	0.14	71	8	160	18	0.786	0.12	37	3	104	13	0.51	0.044	0.025764	CG17566
CG9476	Tubulin alpha-2 chain OS=Drosophila melanogaster GN=alphaTub85E PE=1 SV=1	30	5	685	11	0.421	0.154	70	9	621	15	0.428	0.167	36	10	182	88	0.292	0.129	0.0467299	CG9476
CG2168	40S ribosomal protein S3a OS=Drosophila melanogaster GN=RpS3A PE=1 SV=4	52	7	153	35	0.649	0.347	63	18	226	39	0.765	0.257	36	8	115	75	0.53	0.194	0.0115836	CG2168
CG4799	Importin subunit alpha OS=Drosophila melanogaster GN=Pen PE=1 SV=2	46	8	828	29	0.644	0.241	81	8	294	16	0.69	0.094	36	6	148	65	0.439	0.123	0.0372817	CG4799
CG6258	Replication factor C 38kD subunit OS=Drosophila melanogaster GN=RfC38 PE=1 SV=1	32	5	199	11	0.596	0.16	52	5	113	16	0.677	0.098	36	5	107	36	0.438	0.132	0.0145751	CG6258
CG2238	Isoform B of Elongation factor 2 OS=Drosophila melanogaster GN=Ef2b	50	13	88	27	0.547	0.175	64	5	130	5	0.578	0.036	36	4	76	14	0.328	0.044	0.0119587	CG2238
CG7752	LD15904p OS=Drosophila melanogaster GN=pzg PE=1 SV=1	48	0	124	0	0.379	0	47	9	71	19	0.331	0.06	36	4	92	14	0.229	0.053	0.00092207	CG7752
CG33123	CG33123 OS=Drosophila melanogaster GN=CG33123 PE=3 SV=2	54	0	120	0	0.502	0	54	3	91	3	0.415	0.02	36	0	73	0	0.29	0	0.00699307	CG33123
CG6148	EH domain containing protein OS=Drosophila melanogaster GN=Past1 PE=2 SV=1	49	0	74	0	0.62	0	90	2	209	2	0.753	0.043	35	6	114	14	0.429	0.092	0.0384915	CG6148
CG5289	26S protease regulatory subunit 4 OS=Drosophila melanogaster GN=Pros26.4 PE=1 SV=2	35	4	82	6	0.615	0.089	63	5	164	5	0.615	0.096	35	4	123	25	0.478	0.082	0.0250997	CG5289
CG15100	CG15100 OS=Drosophila melanogaster GN=CG15100 PE=3 SV=1	60	2	89	3	0.577	0.035	77	10	134	11	0.612	0.057	35	3	68	5	0.355	0.039	0.0226244	CG15100
CG7035	Nuclear cap-binding protein subunit 1 OS=Drosophila melanogaster GN=Cbp80 PE=1 SV=1	32	0	60	0	0.369	0	56	0	117	0	0.364	0	35	3	105	4	0.26	0.03	0.0159729	CG7035
CG9802	Chromosome-associated protein, isoform A OS=Drosophila melanogaster GN=Cap PE=1 SV=2	51	0	75	0	0.396	0	65	6	88	11	0.402	0.051	35	3	71	10	0.258	0.022	0.0140012	CG9802
CG3917	Gamma-tubulin ring protein 84, isoform E OS=Drosophila melanogaster GN=Grip84 PE=4 SV=1	35	0	54	0	0.409	0	57	6	92	10	0.506	0.044	35	2	90	15	0.292	0.016	0.0135248	CG3917
CG18572	CAD protein OS=Drosophila melanogaster GN=r PE=1 SV=3	24	0	38	0	0.142	0	62	0	101	0	0.263	0	35	0	82	0	0.153	0	0.0350965	CG18572
CG5931	Putative U5 small nuclear ribonucleoprotein 200 kDa helicase OS=Drosophila melanogaster GN=CG5931 PE=2 SV=4	34	0	48	0	0.215	0	68	0	108	0	0.276	0	35	0	77	0	0.145	0	0.0274738	CG5931
CG7269	ATP-dependent RNA helicase WM6 OS=Drosophila melanogaster GN=Hel25E PE=1 SV=1	32	2	150	12	0.528	0.057	58	5	196	6	0.616	0.052	35	0	172	0	0.38	0	0.0187102	CG7269
CG7490	60S acidic ribosomal protein P0 OS=Drosophila melanogaster GN=RpLP0 PE=1 SV=1	20	7	57	24	0.492	0.259	32	12	67	19	0.514	0.233	34	12	98	70	0.29	0.199	0.0194723	CG7490
CG1966	ATP-dependent chromatin assembly factor large subunit OS=Drosophila melanogaster GN=Acf1 PE=2 SV=1	39	0	49	0	0.266	0	74	13	136	20	0.384	0.051	34	9	72	35	0.223	0.057	0.0348027	CG1966
CG8142	CG8142 OS=Drosophila melanogaster GN=CG8142 PE=1 SV=2	29	6	67	10	0.581	0.17	51	4	97	7	0.547	0.082	34	8	87	42	0.433	0.15	0.0186459	CG8142
CG12202	Nat1 OS=Drosophila melanogaster GN=Nat1 PE=1 SV=1	71	5	115	16	0.574	0.078	54	10	84	15	0.502	0.076	34	4	90	10	0.301	0.031	0.0225368	CG12202
CG8858	Proteasome-associated protein ECM29 homolog OS=Drosophila melanogaster GN=CG8858 PE=1 SV=1	52	0	70	0	0.322	0	70	4	110	6	0.311	0.019	34	4	66	7	0.153	0.022	0.0198447	CG8858
CG12702	CG12702 OS=Drosophila melanogaster GN=CG12702-RA PE=1 SV=1	31	0	37	0	0.378	0	57	5	90	7	0.439	0.052	34	3	87	8	0.284	0.036	0.0200317	CG12702
CG3725	Isoform A of Calcium-transporting ATPase sarcoplasmic/endoplasmic reticulum type OS=Drosophila melanogaster GN=Ca-P60A	30	2	39	3	0.318	0.027	69	6	148	6	0.449	0.048	34	3	87	3	0.269	0.029	0.0401215	CG3725
CG6057	SD02122p OS=Drosophila melanogaster GN=SMC1 PE=2 SV=1	44	0	61	0	0.348	0	53	8	75	10	0.376	0.059	34	2	65	3	0.237	0.015	0.00442531	CG6057
CG13185	CG13185, isoform B OS=Drosophila melanogaster GN=CG13185 PE=1 SV=1	12	0	17	0	0.033	0	81	3	111	3	0.155	0.008	34	0	53	0	0.081	0	0.08952	CG13185
CG31935	Rab3 GTPase-activating protein catalytic subunit OS=Drosophila melanogaster GN=CG31935 PE=1 SV=2	11	0	14	0	0.168	0	55	4	83	6	0.402	0.06	34	0	57	0	0.314	0	0.0632715	CG31935
CG4918	60S acidic ribosomal protein P2 OS=Drosophila melanogaster GN=RpLP2 PE=1 SV=1	15	0	45	0	0.735	0	33	17	130	69	0.77	0.593	33	17	148	165	0.628	0.389	0.0653626	CG4918
CG2979	Vitellogenin-2 OS=Drosophila melanogaster GN=Yp2 PE=1 SV=2	40	8	183	26	0.57	0.183	43	14	80	28	0.459	0.174	33	11	82	36	0.495	0.186	0.00152493	CG2979
CG2637	Importin subunit beta OS=Drosophila melanogaster GN=Fs(2)Ket PE=1 SV=2	50	4	109	16	0.577	0.064	52	0	142	0	0.355	0	33	0	128	0	0.239	0	0.00751971	CG2637
CG8877	Pre-mRNA processing factor 8 OS=Drosophila melanogaster GN=Prp8 PE=4 SV=1	88	0	125	0	0.337	0	74	3	116	4	0.284	0.008	33	0	83	0	0.121	0	0.0300052	CG8877
CG5525	T-complex protein 1 subunit delta OS=Drosophila melanogaster GN=CG5525 PE=1 SV=1	60	5	246	14	0.705	0.148	52	8	153	13	0.597	0.098	32	6	75	24	0.407	0.088	0.0182044	CG5525
CG8711	Cullin-4, isoform A OS=Drosophila melanogaster GN=Cul-4 PE=1 SV=1	47	2	64	7	0.419	0.026	71	8	136	11	0.474	0.078	32	5	76	8	0.242	0.052	0.0275945	CG8711
CG9888	rRNA 2'-O-methyltransferase fibrillarin OS=Drosophila melanogaster GN=Fib PE=1 SV=1	40	4	307	13	0.413	0.157	36	7	196	14	0.573	0.14	32	5	112	27	0.352	0.108	0.00115533	CG9888
CG33101	Vesicle-fusing ATPase 2 OS=Drosophila melanogaster GN=Nsf2 PE=2 SV=2	52	2	85	2	0.585	0.031	65	5	116	6	0.561	0.043	32	3	71	6	0.312	0.043	0.0196639	CG33101
CG5899	CG5899, isoform C OS=Drosophila melanogaster GN=Etl1 PE=4 SV=1	27	0	51	0	0.391	0	59	2	123	2	0.457	0.013	32	3	84	15	0.331	0.049	0.0310107	CG5899
CG31368	CG31368, isoform D OS=Drosophila melanogaster GN=CG31368 PE=1 SV=2	12	0	13	0	0.116	0	61	0	111	0	0.366	0	32	2	71	4	0.191	0.013	0.0684431	CG31368
CG11198	CG11198, isoform D OS=Drosophila melanogaster GN=ACC PE=4 SV=1	10	0	11	0	0.075	0	49	7	75	9	0.205	0.021	32	0	68	0	0.15	0	0.0629737	CG11198
CG1371	CG1371 OS=Drosophila melanogaster GN=CG1371 PE=4 SV=1	13	0	15	0	0.117	0	39	4	71	4	0.317	0.038	32	0	72	0	0.225	0	0.0357057	CG1371
CG18102	Dynamin OS=Drosophila melanogaster GN=shi PE=1 SV=2	49	0	84	0	0.453	0	67	8	127	9	0.454	0.057	32	0	61	0	0.267	0	0.0182714	CG18102
CG8103	Chromodomain-helicase-DNA-binding protein Mi-2 homolog OS=Drosophila melanogaster GN=Mi-2 PE=1 SV=2	28	0	37	0	0.195	0	52	6	74	8	0.263	0.016	31	6	66	16	0.191	0.032	0.0204713	CG8103
CG2684	Transcription termination factor 2 OS=Drosophila melanogaster GN=lds PE=1 SV=2	25	0	36	0	0.268	0	50	4	77	8	0.348	0.031	31	4	80	10	0.265	0.041	0.0227673	CG2684
CG3401	Tubulin beta-3 chain OS=Drosophila melanogaster GN=betaTub60D PE=1 SV=2	30	5	477	27	0.63	0.13	62	4	171	7	0.524	0.051	31	4	151	37	0.262	0.077	0.0365138	CG3401
CG4609	Failed axon connections, isoform A OS=Drosophila melanogaster GN=fax PE=1 SV=1	26	0	182	0	0.519	0	37	3	85	3	0.498	0.072	31	3	55	17	0.452	0.074	0.00353987	CG4609
CG2331	Isoform D of Transitional endoplasmic reticulum ATPase TER94 OS=Drosophila melanogaster GN=TER94	43	5	77	10	0.505	0.083	43	4	94	4	0.494	0.039	31	2	67	6	0.285	0.023	0.00492991	CG2331
CG30085	CG30085 OS=Drosophila melanogaster GN=CG30085 PE=1 SV=1	44	0	53	0	0.344	0	53	5	83	10	0.319	0.037	31	2	57	5	0.221	0.028	0.00994772	CG30085
CG10122	DNA-directed RNA polymerase I subunit RPA1 OS=Drosophila melanogaster GN=RpI1 PE=1 SV=2	23	0	25	0	0.172	0	50	0	97	0	0.32	0	31	0	54	0	0.18	0	0.0247126	CG10122
CG34407	Not1, isoform C OS=Drosophila melanogaster GN=Not1 PE=4 SV=1	40	0	58	0	0.181	0	74	2	106	3	0.24	0.004	31	0	77	0	0.089	0	0.0337489	CG34407
CG7111	Guanine nucleotide-binding protein subunit beta-like protein OS=Drosophila melanogaster GN=Rack1 PE=2 SV=2	38	6	163	21	0.67	0.173	50	9	97	23	0.632	0.179	30	8	132	38	0.412	0.195	0.0148492	CG7111
CG6339	DNA repair protein RAD50 OS=Drosophila melanogaster GN=rad50 PE=2 SV=3	34	0	41	0	0.24	0	52	6	65	6	0.329	0.037	30	4	65	5	0.201	0.027	0.0141526	CG6339
CG31639	26S proteasome regulatory complex subunit p37A OS=Drosophila melanogaster GN=Uch-L3 PE=2 SV=1	37	5	77	10	0.679	0.16	43	2	73	2	0.741	0.074	30	2	100	9	0.515	0.052	0.00429908	CG31639
CG6181	Enhancer of mRNA-decapping protein 4 homolog OS=Drosophila melanogaster GN=Ge-1 PE=1 SV=2	10	0	14	0	0.082	0	36	2	53	2	0.226	0.017	30	2	59	3	0.181	0.011	0.0457769	CG6181
CG17489	60S ribosomal protein L5 OS=Drosophila melanogaster GN=RpL5 PE=1 SV=2	44	10	455	25	0.572	0.241	18	8	34	22	0.425	0.084	29	10	73	84	0.492	0.214	0.0535582	CG17489
CG4863	60S ribosomal protein L3 OS=Drosophila melanogaster GN=RpL3 PE=2 SV=3	54	8	173	143	0.56	0.161	29	9	56	17	0.469	0.12	29	5	77	24	0.38	0.101	0.0332107	CG4863
CG13349	CG13349, isoform D OS=Drosophila melanogaster GN=CG13349 PE=4 SV=1	42	3	212	6	0.809	0.092	64	0	181	0	0.755	0	29	3	76	6	0.505	0.052	0.0254085	CG13349
CG5170	Dodeca-satellite-binding protein 1, isoform A OS=Drosophila melanogaster GN=Dp1 PE=2 SV=1	16	0	21	0	0.151	0	32	3	44	4	0.243	0.027	29	2	62	4	0.18	0.017	0.0179224	CG5170
CG5520	Glycoprotein 93 OS=Drosophila melanogaster GN=Gp93 PE=1 SV=1	29	0	39	0	0.389	0	48	4	77	5	0.375	0.058	29	0	60	0	0.264	0	0.0143086	CG5520
CG5838	DNA replication-related element factor OS=Drosophila melanogaster GN=Dref PE=1 SV=2	60	7	178	12	0.573	0.117	82	14	351	48	0.508	0.106	28	9	258	41	0.26	0.116	0.0471339	CG5838
CG17291	Serine/threonine-protein phosphatase PP2A 65 kDa regulatory subunit OS=Drosophila melanogaster GN=Pp2A-29B PE=1 SV=4	63	4	365	11	0.635	0.078	59	7	198	15	0.523	0.068	28	3	80	16	0.338	0.046	0.0265717	CG17291
CG11901	Elongation factor 1-gamma OS=Drosophila melanogaster GN=Ef1gamma PE=2 SV=2	29	7	73	18	0.501	0.181	32	5	49	6	0.545	0.081	28	2	58	18	0.434	0.042	0.000115136	CG11901
CG4001	6-phosphofructokinase OS=Drosophila melanogaster GN=Pfk PE=2 SV=2	25	0	40	0	0.315	0	39	0	63	0	0.445	0	28	0	78	0	0.343	0	0.0093595	CG4001
CG5366	CG5366 OS=Drosophila melanogaster GN=CG5366 PE=2 SV=1	29	0	43	0	0.292	0	43	0	65	0	0.335	0	28	0	63	0	0.234	0	0.0102274	CG5366
CG5965	Without children, isoform B OS=Drosophila melanogaster GN=woc PE=4 SV=1	14	0	15	0	0.114	0	28	0	39	0	0.186	0	28	0	71	0	0.18	0	0.0188748	CG5965
CG8590	EG:BACR25B3.9 protein OS=Drosophila melanogaster GN=Klp3A PE=1 SV=1	36	0	53	0	0.357	0	47	4	73	4	0.337	0.024	28	0	70	0	0.221	0	0.00920554	CG8590
CG4087	60S acidic ribosomal protein P1 OS=Drosophila melanogaster GN=RpLP1 PE=1 SV=2	10	3	37	5	0.741	0.429	24	30	37	93	0.705	0.366	27	18	93	124	0.536	0.366	0.371665	CG4087
CG14999	Replication factor C subunit 2 OS=Drosophila melanogaster GN=RfC4 PE=1 SV=1	27	5	110	7	0.668	0.166	52	10	106	12	0.719	0.248	27	8	56	33	0.613	0.199	0.0379392	CG14999
CG9750	RuvB-like helicase 2 OS=Drosophila melanogaster GN=rept PE=1 SV=1	25	5	39	13	0.474	0.116	27	3	43	3	0.387	0.071	27	8	52	23	0.366	0.179	0.000662305	CG9750
CG4183	Heat shock protein 26 OS=Drosophila melanogaster GN=Hsp26 PE=1 SV=2	41	5	439	78	0.611	0.255	43	4	96	5	0.798	0.111	27	6	114	63	0.486	0.159	0.0113283	CG4183
CG5313	Replication factor C subunit 3 OS=Drosophila melanogaster GN=RfC3 PE=1 SV=2	23	8	48	16	0.587	0.187	26	5	47	6	0.524	0.105	27	3	74	10	0.476	0.051	0.00026749	CG5313
CG17023	DEAD-box helicase Dbp80 OS=Drosophila melanogaster GN=Dbp80 PE=1 SV=1	24	0	35	0	0.37	0	40	2	75	5	0.574	0.035	27	0	66	0	0.313	0	0.0122867	CG17023
CG3180	DNA-directed RNA polymerase II subunit RPB2 OS=Drosophila melanogaster GN=RpII140 PE=2 SV=2	10	0	10	0	0.122	0	47	0	68	0	0.311	0	27	0	49	0	0.207	0	0.0600587	CG3180
CG5353	FI05224p OS=Drosophila melanogaster GN=Aats-thr PE=2 SV=2	25	2	28	4	0.361	0.035	41	0	65	0	0.446	0	27	0	63	0	0.321	0	0.0123881	CG5353
CG8309	Eukaryotic translation initiation factor 3 subunit M OS=Drosophila melanogaster GN=Tango7 PE=2 SV=1	29	7	151	14	0.693	0.202	39	4	75	4	0.545	0.067	27	0	72	0	0.434	0	0.00317985	CG8309
CG4303	Brahma associated protein 60kD OS=Drosophila melanogaster GN=Bap60 PE=1 SV=1	23	5	37	6	0.408	0.101	47	3	69	3	0.47	0.058	26	6	66	12	0.28	0.091	0.0333308	CG4303
CG7467	Trithorax group protein osa OS=Drosophila melanogaster GN=osa PE=1 SV=1	17	0	22	0	0.079	0	40	12	54	16	0.108	0.042	26	6	55	20	0.086	0.022	0.0318816	CG7467
CG6141	60S ribosomal protein L9 OS=Drosophila melanogaster GN=RpL9 PE=1 SV=2	19	2	236	8	0.747	0.1	36	3	267	3	0.732	0.137	26	5	88	19	0.584	0.158	0.0186123	CG6141
CG10198	Nup98 OS=Drosophila melanogaster GN=Nup98 PE=1 SV=3	28	0	53	0	0.158	0	67	11	143	21	0.197	0.032	26	4	74	10	0.091	0.018	0.0553937	CG10198
CG10370	26S proteasome regulatory complex subunit p50 OS=Drosophila melanogaster GN=Tbp-1 PE=2 SV=1	37	0	305	0	0.624	0	75	0	177	0	0.759	0	26	3	76	9	0.458	0.063	0.0465463	CG10370
CG7619	26S proteasome non-ATPase regulatory subunit 4 OS=Drosophila melanogaster GN=Pros54 PE=1 SV=2	24	0	62	0	0.715	0	34	4	72	5	0.818	0.076	26	3	72	15	0.23	0.106	0.00353998	CG7619
CG7055	DALAO protein OS=Drosophila melanogaster GN=dalao PE=1 SV=1	31	4	63	9	0.31	0.039	33	11	55	24	0.295	0.083	26	2	58	8	0.219	0.037	0.00134187	CG7055
CG4236	Probable histone-binding protein Caf1 OS=Drosophila melanogaster GN=Caf1 PE=1 SV=1	11	0	42	0	0.293	0	26	5	47	8	0.409	0.063	26	0	62	0	0.4	0	0.0245807	CG4236
CG42616	Cullin 3, isoform F OS=Drosophila melanogaster GN=Cul-3 PE=3 SV=2	40	0	66	0	0.429	0	74	5	115	9	0.536	0.064	26	0	50	0	0.221	0	0.0427064	CG42616
CG4579	Nup154 OS=Drosophila melanogaster GN=Nup154 PE=2 SV=1	20	0	28	0	0.195	0	52	2	105	2	0.309	0.014	26	0	74	0	0.155	0	0.0410019	CG4579
CG8322	ATP citrate lyase, isoform D OS=Drosophila melanogaster GN=ATPCL PE=1 SV=1	16	0	23	0	0.175	0	49	2	71	9	0.349	0.013	26	0	56	0	0.211	0	0.0464035	CG8322
CG9020	Probable arginyl-tRNA synthetase, cytoplasmic OS=Drosophila melanogaster GN=Aats-arg PE=2 SV=1	32	2	32	7	0.349	0.036	36	5	57	6	0.355	0.053	26	0	49	0	0.32	0	0.00160263	CG9020
CG8092	RE01954p OS=Drosophila melanogaster GN=row PE=1 SV=1	21	0	26	0	0.238	0	38	6	71	8	0.269	0.036	25	7	48	11	0.173	0.068	0.0147175	CG8092
CG8882	Eukaryotic translation initiation factor 3 subunit I OS=Drosophila melanogaster GN=Trip1 PE=1 SV=1	27	8	116	12	0.776	0.313	37	9	93	15	0.828	0.227	25	6	70	32	0.469	0.19	0.0112	CG8882
CG9677	Eukaryotic translation initiation factor 3 subunit E OS=Drosophila melanogaster GN=eIF3-S6 PE=2 SV=1	19	3	39	3	0.414	0.062	26	0	36	0	0.372	0	25	6	59	18	0.336	0.115	0.00114274	CG9677
CG1883	40S ribosomal protein S7 OS=Drosophila melanogaster GN=RpS7 PE=2 SV=1	39	4	99	13	0.665	0.18	43	16	143	50	0.727	0.381	25	5	93	40	0.448	0.165	0.00925767	CG1883
CG18408	Chromosome-associated protein, isoform B OS=Drosophila melanogaster GN=Cap PE=2 SV=1	41	0	64	0	0.38	0	48	4	68	9	0.379	0.036	25	3	53	10	0.238	0.026	0.0156456	CG18408
CG4365	CG4365, isoform A OS=Drosophila melanogaster GN=CG4365 PE=2 SV=2	16	0	32	0	0.554	0	28	3	45	3	0.603	0.095	25	3	55	4	0.531	0.115	0.0108965	CG4365
CG5733	Nup75 OS=Drosophila melanogaster GN=Nup75 PE=4 SV=1	20	4	41	9	0.377	0.07	44	3	89	4	0.476	0.025	25	3	55	9	0.265	0.034	0.0344371	CG5733
CG1528	Isoform C of Coatomer subunit gamma OS=Drosophila melanogaster GN=gammaCop	36	2	113	6	0.457	0.032	56	2	149	2	0.467	0.021	25	2	65	4	0.211	0.021	0.027604	CG1528
CG1691	IGF-II mRNA-binding protein, isoform D OS=Drosophila melanogaster GN=Imp PE=2 SV=1	30	0	109	0	0.41	0	44	4	85	5	0.5	0.06	25	2	69	6	0.311	0.026	0.0139958	CG1691
CG31739	CG31739 OS=Drosophila melanogaster GN=mdy PE=1 SV=3	25	0	36	0	0.279	0	59	6	92	8	0.446	0.037	25	2	58	6	0.217	0.018	0.04687	CG31739
CG33122	Cutlet OS=Drosophila melanogaster GN=cutlet PE=2 SV=2	22	0	24	0	0.276	0	45	0	68	0	0.383	0	25	2	45	2	0.24	0.031	0.026098	CG33122
CG12113	GH13214p OS=Drosophila melanogaster GN=l(1)G0095 PE=1 SV=1	29	0	43	0	0.308	0	55	0	94	0	0.414	0	25	0	63	0	0.203	0	0.0304689	CG12113
CG1512	Cul-2, isoform A OS=Drosophila melanogaster GN=Cul-2 PE=2 SV=3	20	0	25	0	0.235	0	35	3	52	3	0.368	0.033	25	0	52	0	0.263	0	0.0118286	CG1512
CG1945	Probable ubiquitin carboxyl-terminal hydrolase FAF OS=Drosophila melanogaster GN=faf PE=1 SV=2	15	0	18	0	0.095	0	52	0	71	0	0.178	0	25	0	54	0	0.091	0	0.0545095	CG1945
CG13900	CG13900, isoform A OS=Drosophila melanogaster GN=CG13900-RA PE=2 SV=2	10	0	15	0	0.112	0	36	8	52	16	0.294	0.054	24	4	42	14	0.192	0.035	0.0566254	CG13900
CG5378	26S proteasome non-ATPase regulatory subunit 6 OS=Drosophila melanogaster GN=Rpn7 PE=1 SV=1	33	4	58	11	0.584	0.111	37	9	61	11	0.504	0.123	24	4	77	15	0.342	0.077	0.00574148	CG5378
CG13391	Alanyl-tRNA synthetase, cytoplasmic OS=Drosophila melanogaster GN=Aats-ala PE=2 SV=1	26	0	30	0	0.341	0	41	10	64	17	0.406	0.059	24	2	52	2	0.259	0.027	0.0105478	CG13391
CG5119	Polyadenylate-binding protein OS=Drosophila melanogaster GN=pAbp PE=1 SV=3	53	9	181	21	0.584	0.211	41	2	60	3	0.511	0.019	24	2	57	2	0.311	0.035	0.0223705	CG5119
CG6370	CG6370 OS=Drosophila melanogaster GN=CG6370 PE=1 SV=1	16	0	18	0	0.278	0	37	2	55	2	0.424	0.014	24	2	55	5	0.183	0.033	0.0281156	CG6370
CG3821	Aspartyl-tRNA synthetase OS=Drosophila melanogaster GN=Aats-asp PE=1 SV=1	24	0	74	0	0.401	0	31	0	49	0	0.51	0	24	0	54	0	0.386	0	0.00388002	CG3821
CG9484	E3 ubiquitin-protein ligase hyd OS=Drosophila melanogaster GN=hyd PE=1 SV=3	17	0	21	0	0.101	0	65	6	96	7	0.242	0.02	24	0	51	0	0.096	0	0.076819	CG9484
CG4634	Inorganic pyrophosphatase OS=Drosophila melanogaster GN=Nurf-38 PE=1 SV=3	27	5	91	7	0.669	0.189	34	3	58	3	0.657	0.083	23	3	66	7	0.467	0.083	0.00702294	CG4634
CG40411	Poly [ADP-ribose] polymerase OS=Drosophila melanogaster GN=Parp PE=2 SV=1	52	0	76	0	0.405	0	41	0	58	0	0.365	0	23	2	45	3	0.262	0.019	0.0226514	CG40411
CG6174	Actin-like protein 87C OS=Drosophila melanogaster GN=Arp87C PE=1 SV=2	29	5	67	9	0.505	0.112	40	3	121	5	0.529	0.051	23	2	100	10	0.332	0.051	0.0142297	CG6174
CG4033	DNA-directed RNA polymerase I subunit RPA2 OS=Drosophila melanogaster GN=RpI135 PE=2 SV=2	27	0	32	0	0.278	0	59	3	93	5	0.468	0.019	23	0	71	0	0.178	0	0.0445026	CG4033
CG7671	CG7671 OS=Drosophila melanogaster GN=Nup43 PE=1 SV=1	15	0	22	0	0.416	0	32	0	45	0	0.494	0	23	0	58	0	0.358	0	0.0207727	CG7671
CG9999	Ran GTPase-activating protein OS=Drosophila melanogaster GN=RanGap PE=1 SV=1	29	0	48	0	0.495	0	40	4	68	8	0.502	0.044	23	0	57	0	0.247	0	0.0107946	CG9999
CG5064	Signal recognition particle 68 kDa protein OS=Drosophila melanogaster GN=Srp68 PE=1 SV=1	30	5	44	10	0.477	0.079	25	6	36	6	0.366	0.071	22	6	50	10	0.305	0.086	0.00602195	CG5064
CG13849	FI04781p OS=Drosophila melanogaster GN=Nop56 PE=2 SV=1	39	6	117	12	0.538	0.169	33	8	87	12	0.429	0.097	22	5	47	32	0.331	0.062	0.0170191	CG13849
CG5434	Srp72 OS=Drosophila melanogaster GN=Srp72 PE=1 SV=1	43	4	60	5	0.578	0.069	40	4	67	5	0.523	0.055	22	5	39	14	0.346	0.069	0.021245	CG5434
CG2985	Vitellogenin-1 OS=Drosophila melanogaster GN=Yp1 PE=1 SV=1	41	5	128	27	0.576	0.203	45	9	90	13	0.567	0.123	22	4	56	38	0.36	0.057	0.0230884	CG2985
CG4157	26S proteasome regulatory complex subunit p30 OS=Drosophila melanogaster GN=Rpn12 PE=1 SV=1	13	2	67	5	0.42	0.08	17	5	28	9	0.489	0.11	22	4	51	11	0.413	0.11	0.0123881	CG4157
CG8947	26-29kD-proteinase OS=Drosophila melanogaster GN=26-29-p PE=2 SV=1	26	2	57	3	0.457	0.042	33	6	57	10	0.326	0.055	22	4	66	15	0.228	0.051	0.00575101	CG8947
CG9946	Eukaryotic translation initiation factor 2 subunit 1 OS=Drosophila melanogaster GN=eIF-2alpha PE=1 SV=1	24	0	36	0	0.522	0	32	8	63	24	0.522	0.188	22	4	46	34	0.34	0.085	0.0028256	CG9946
CG8815	LD13852p OS=Drosophila melanogaster GN=Sin3A PE=1 SV=1	37	0	52	0	0.23	0	40	11	62	16	0.229	0.04	22	3	57	5	0.126	0.022	0.00935205	CG8815
CG18176	Deflated OS=Drosophila melanogaster GN=defl PE=2 SV=1	10	0	14	0	0.118	0	46	2	62	2	0.369	0.008	22	2	52	3	0.169	0.024	0.0722646	CG18176
CG8893	Glyceraldehyde-3-phosphate dehydrogenase 2 OS=Drosophila melanogaster GN=Gapdh2 PE=1 SV=2	24	3	142	6	0.732	0.136	44	5	96	7	0.633	0.105	22	2	226	6	0.355	0.081	0.0303895	CG8893
CG10944	40S ribosomal protein S6 OS=Drosophila melanogaster GN=RpS6 PE=1 SV=1	34	8	133	53	0.44	0.274	30	3	49	8	0.444	0.121	22	0	61	0	0.347	0	0.00317463	CG10944
CG12055	Glyceraldehyde-3-phosphate dehydrogenase 1 OS=Drosophila melanogaster GN=Gapdh1 PE=2 SV=2	23	3	91	6	0.687	0.136	40	5	85	5	0.551	0.102	22	0	212	0	0.367	0	0.0206204	CG12055
CG14472	Protein purity of essence OS=Drosophila melanogaster GN=poe PE=1 SV=1	8	0	12	0	0.027	0	54	0	88	0	0.115	0	22	0	43	0	0.053	0	0.0879976	CG14472
CG2982	Lysine-specific demethylase NO66 OS=Drosophila melanogaster GN=CG2982 PE=1 SV=1	24	4	37	22	0.351	0.075	47	0	96	0	0.493	0	22	0	52	0	0.329	0	0.0311509	CG2982
CG6582	Apoptosis inhibitor 5 homolog OS=Drosophila melanogaster GN=Aac11 PE=1 SV=1	33	0	82	0	0.552	0	36	0	59	0	0.487	0	22	0	56	0	0.269	0	0.00956044	CG6582
CG7436	Glycylpeptide N-tetradecanoyltransferase OS=Drosophila melanogaster GN=Nmt PE=2 SV=2	29	3	49	6	0.453	0.087	35	0	57	0	0.597	0	22	0	48	0	0.392	0	0.00664563	CG7436
CG7583	C-terminal-binding protein OS=Drosophila melanogaster GN=CtBP PE=1 SV=3	21	12	85	31	0.324	0.16	30	3	62	6	0.51	0.049	22	0	63	0	0.394	0	0.00759368	CG7583
CG7434	60S ribosomal protein L22 OS=Drosophila melanogaster GN=RpL22 PE=1 SV=2	26	7	252	64	0.515	0.217	26	4	65	18	0.411	0.13	21	9	99	54	0.361	0.12	0.000718254	CG7434
CG8857	Ribosomal protein S11, isoform C OS=Drosophila melanogaster GN=RpS11 PE=3 SV=1	23	7	73	18	0.394	0.31	19	5	36	6	0.471	0.181	21	7	75	28	0.465	0.245	0.000597076	CG8857
CG12244	Licorne OS=Drosophila melanogaster GN=lic PE=1 SV=1	23	2	41	4	0.587	0.081	33	7	74	16	0.656	0.135	21	6	50	53	0.422	0.147	0.009495	CG12244
CG14813	Delta-coatomer protein, isoform A OS=Drosophila melanogaster GN=deltaCOP PE=1 SV=1	13	0	16	0	0.263	0	32	8	77	10	0.455	0.126	21	6	59	15	0.267	0.1	0.0353508	CG14813
CG8900	40S ribosomal protein S18 OS=Drosophila melanogaster GN=RpS18 PE=1 SV=1	17	6	42	21	0.52	0.388	22	4	40	10	0.592	0.112	21	5	52	23	0.553	0.164	0.00250797	CG8900
CG6546	Brahma associated protein 55kD OS=Drosophila melanogaster GN=Bap55 PE=2 SV=1	30	2	58	6	0.642	0.047	52	7	144	8	0.652	0.134	21	4	68	11	0.416	0.104	0.0396277	CG6546
CG10223	DNA topoisomerase 2 OS=Drosophila melanogaster GN=Top2 PE=1 SV=1	48	4	81	6	0.326	0.037	33	4	46	8	0.207	0.026	21	3	36	4	0.135	0.026	0.0300525	CG10223
CG7257	AT06668p OS=Drosophila melanogaster GN=Rpt4R PE=1 SV=1	13	0	32	0	0.151	0	14	0	33	0	0.151	0	21	3	74	6	0.151	0.043	0.00824708	CG7257
CG11092	CG11092 OS=Drosophila melanogaster GN=CG11092 PE=1 SV=1	21	0	24	0	0.323	0	24	0	39	0	0.261	0	21	2	44	7	0.207	0.023	7.65448e-05	CG11092
CG9854	FI03258p OS=Drosophila melanogaster GN=hrg PE=1 SV=1	30	0	56	0	0.44	0	44	0	76	0	0.498	0	21	2	80	5	0.264	0.018	0.021182	CG9854
CG12352	Probable N-acetyltransferase san OS=Drosophila melanogaster GN=san PE=1 SV=1	14	0	22	0	0.511	0	26	0	51	0	0.739	0	21	0	66	0	0.446	0	0.0140329	CG12352
CG1554	DNA-directed RNA polymerase II subunit RPB1 OS=Drosophila melanogaster GN=RpII215 PE=1 SV=4	24	0	25	0	0.163	0	48	0	84	0	0.253	0	21	0	47	0	0.121	0	0.0341374	CG1554
CG17665	Integrator complex subunit 3 homolog OS=Drosophila melanogaster GN=CG17665 PE=1 SV=1	16	0	22	0	0.192	0	38	0	52	0	0.225	0	21	0	42	0	0.162	0	0.03209	CG17665
CG2943	CG2943 OS=Drosophila melanogaster GN=CG2943 PE=2 SV=1	22	0	23	0	0.217	0	40	5	55	8	0.389	0.046	21	0	42	0	0.201	0	0.0219862	CG2943
CG8732	Lethal (2) 44DEa, isoform A OS=Drosophila melanogaster GN=Acsl PE=2 SV=1	10	0	13	0	0.183	0	19	3	34	4	0.303	0.035	21	0	45	0	0.309	0	0.0174369	CG8732
CG11129	Vitellogenin-3 OS=Drosophila melanogaster GN=Yp3 PE=1 SV=1	36	13	238	82	0.502	0.305	38	10	66	22	0.517	0.121	20	12	51	40	0.398	0.226	0.035675	CG11129
CG10712	Chromator, isoform A OS=Drosophila melanogaster GN=Chro PE=1 SV=1	32	0	60	0	0.359	0	38	10	63	16	0.326	0.078	20	6	45	21	0.202	0.08	0.0123934	CG10712
CG3274	Brahma associated protein 170kD OS=Drosophila melanogaster GN=Bap170 PE=4 SV=1	27	2	38	7	0.194	0.023	65	13	122	26	0.334	0.043	20	6	37	11	0.098	0.034	0.0782443	CG3274
CG9206	Dynactin subunit 1 OS=Drosophila melanogaster GN=Gl PE=1 SV=2	18	0	39	0	0.191	0	38	3	55	6	0.342	0.028	20	6	35	10	0.191	0.036	0.0317678	CG9206
CG1524;	40S ribosomal protein S14 OS=Drosophila melanogaster GN=RpS14a PE=1 SV=1	30	7	118	59	0.689	0.364	30	8	75	22	0.503	0.364	20	4	97	44	0.437	0.172	0.00839453	CG1524;
CG10077	CG10077, isoform A OS=Drosophila melanogaster GN=CG10077 PE=1 SV=1	19	2	31	5	0.271	0.029	38	4	92	14	0.328	0.039	20	3	96	9	0.192	0.029	0.0328067	CG10077
CG3193	Protein crooked neck OS=Drosophila melanogaster GN=crn PE=1 SV=2	21	0	28	0	0.283	0	38	4	55	4	0.343	0.044	20	3	42	16	0.252	0.033	0.0246557	CG3193
CG33303	CG33303 OS=Drosophila melanogaster GN=CG33303 PE=1 SV=1	17	0	20	0	0.31	0	23	2	39	2	0.332	0.048	20	3	59	15	0.225	0.055	0.00131235	CG33303
CG5642	Eukaryotic translation initiation factor 3 subunit L OS=Drosophila melanogaster GN=CG5642 PE=1 SV=1	24	5	42	11	0.414	0.106	41	3	68	7	0.434	0.048	20	3	53	14	0.237	0.048	0.0302031	CG5642
CG10230	26S proteasome regulatory complex subunit p39A OS=Drosophila melanogaster GN=Rpn9 PE=1 SV=1	40	4	110	11	0.696	0.123	31	0	56	0	0.414	0	20	2	153	15	0.374	0.026	0.0174621	CG10230
CG4849	CG4849 OS=Drosophila melanogaster GN=CG4849 PE=2 SV=1	18	0	19	0	0.294	0	31	6	49	10	0.332	0.055	20	2	49	16	0.202	0.022	0.0117098	CG4849
CG9423	Karyopherin alpha 3 OS=Drosophila melanogaster GN=Kap-alpha3 PE=2 SV=1	39	6	285	15	0.518	0.109	31	4	60	7	0.475	0.039	20	2	57	2	0.214	0.035	0.0186157	CG9423
CG1059	FI07923p OS=Drosophila melanogaster GN=Karybeta3 PE=2 SV=1	14	0	16	0	0.177	0	39	2	53	2	0.336	0.02	20	0	38	0	0.17	0	0.0435186	CG1059
CG3068	Aurora OS=Drosophila melanogaster GN=aur PE=2 SV=1	13	0	14	0	0.273	0	31	0	45	0	0.472	0	20	0	60	0	0.27	0	0.0276721	CG3068
CG4747	Putative oxidoreductase GLYR1 homolog OS=Drosophila melanogaster GN=CG4747 PE=1 SV=1	24	11	36	23	0.407	0.193	28	0	37	0	0.463	0	20	0	42	0	0.277	0	0.00702054	CG4747
CG3395	40S ribosomal protein S9 OS=Drosophila melanogaster GN=RpS9 PE=1 SV=2	22	8	112	88	0.41	0.277	22	10	41	18	0.513	0.169	19	9	69	94	0.426	0.241	0.000713293	CG3395
CG5393	Apontic OS=Drosophila melanogaster GN=apt PE=2 SV=1	13	0	18	0	0.267	0	20	6	26	6	0.329	0.077	19	7	52	21	0.275	0.153	0.00681781	CG5393
CG6061	Protein lin-54 homolog OS=Drosophila melanogaster GN=mip120 PE=1 SV=1	12	0	24	0	0.178	0	22	2	29	2	0.265	0.031	19	7	34	13	0.222	0.103	0.00959822	CG6061
CG11276	40S ribosomal protein S4 OS=Drosophila melanogaster GN=RpS4 PE=2 SV=2	23	7	170	160	0.521	0.218	46	5	84	10	0.693	0.123	19	5	44	18	0.437	0.149	0.0528192	CG11276
CG18811	Caprin homolog OS=Drosophila melanogaster GN=CG18811 PE=1 SV=1	28	2	46	2	0.373	0.023	20	4	30	6	0.185	0.036	19	4	64	7	0.144	0.029	0.00875974	CG18811
CG8636	Eukaryotic translation initiation factor 3 subunit G-1 OS=Drosophila melanogaster GN=eIF3-S4-1 PE=1 SV=1	18	5	52	15	0.558	0.253	19	0	36	0	0.416	0	19	4	62	11	0.413	0.145	0.00359369	CG8636
CG11788	CG11788 OS=Drosophila melanogaster GN=CG11788 PE=1 SV=1	18	0	25	0	0.435	0	29	2	46	4	0.551	0.045	19	2	33	3	0.344	0.038	0.0121741	CG11788
CG5371	Ribonucleoside-diphosphate reductase large subunit OS=Drosophila melanogaster GN=RnrL PE=1 SV=2	44	0	70	0	0.534	0	47	0	70	0	0.355	0	19	2	46	4	0.196	0.02	0.027498	CG5371
CG12132	C11.1 OS=Drosophila melanogaster GN=c11.1 PE=1 SV=2	4	0	4	0	0.041	0	34	0	41	0	0.165	0	19	0	30	0	0.118	0	0.0797447	CG12132
CG12306	Serine/threonine-protein kinase polo OS=Drosophila melanogaster GN=polo PE=1 SV=2	34	0	55	0	0.517	0	26	4	38	7	0.352	0.054	19	0	36	0	0.273	0	0.0105551	CG12306
CG1877	Cullin homolog 1 OS=Drosophila melanogaster GN=lin19 PE=1 SV=2	18	0	19	0	0.235	0	22	0	29	0	0.236	0	19	0	40	0	0.226	0	0.00185688	CG1877
CG3173	CG3173 OS=Drosophila melanogaster GN=CG3173 PE=1 SV=2	23	0	32	0	0.173	0	50	3	70	3	0.215	0.012	19	0	31	0	0.084	0	0.0457027	CG3173
CG9543	BcDNA.LD29885 OS=Drosophila melanogaster GN=epsilonCOP PE=1 SV=1	21	3	38	6	0.516	0.072	18	12	37	35	0.395	0.183	18	9	49	63	0.297	0.186	0.0199358	CG9543
CG5363	Cyclin-dependent kinase 1 OS=Drosophila melanogaster GN=cdc2 PE=1 SV=1	25	4	47	8	0.677	0.168	26	3	41	3	0.569	0.064	18	5	47	27	0.367	0.141	0.00678085	CG5363
CG9193	Proliferating cell nuclear antigen OS=Drosophila melanogaster GN=mus209 PE=1 SV=2	16	0	38	0	0.569	0	20	3	26	8	0.588	0.081	18	4	33	10	0.373	0.138	0.000359629	CG9193
CG3612	ATP synthase subunit alpha, mitochondrial OS=Drosophila melanogaster GN=blw PE=1 SV=2	19	3	32	3	0.359	0.069	32	4	58	7	0.446	0.054	18	3	34	15	0.272	0.058	0.0240287	CG3612
CG7413	Retinoblastoma family protein OS=Drosophila melanogaster GN=Rbf PE=1 SV=2	12	0	17	0	0.147	0	22	3	40	9	0.283	0.053	18	3	34	5	0.169	0.025	0.012135	CG7413
CG17514	CG17514, isoform A OS=Drosophila melanogaster GN=CG17514 PE=1 SV=2	37	0	49	0	0.183	0	38	2	54	2	0.144	0.007	18	2	31	2	0.065	0.007	0.0217979	CG17514
CG5650	Serine/threonine-protein phosphatase alpha-2 isoform OS=Drosophila melanogaster GN=Pp1-87B PE=1 SV=1	19	3	45	5	0.543	0.119	37	2	83	2	0.692	0.06	18	2	78	11	0.377	0.063	0.0341112	CG5650
CG11943	CG11943, isoform A OS=Drosophila melanogaster GN=CG11943 PE=2 SV=2	17	0	23	0	0.127	0	34	0	47	0	0.157	0	18	0	31	0	0.082	0	0.0264187	CG11943
CG1618	Vesicle-fusing ATPase 1 OS=Drosophila melanogaster GN=comt PE=1 SV=1	22	0	30	0	0.228	0	32	3	40	4	0.272	0.026	18	0	44	0	0.195	0	0.0129435	CG1618
CG17259	CG17259 OS=Drosophila melanogaster GN=CG17259 PE=1 SV=1	15	0	17	0	0.269	0	16	2	23	2	0.391	0.046	18	0	30	0	0.361	0	0.000112295	CG17259
CG17509	Pds5 OS=Drosophila melanogaster GN=pds5 PE=2 SV=1	21	0	30	0	0.19	0	34	2	53	2	0.265	0.018	18	0	37	0	0.161	0	0.019161	CG17509
CG4320	Raptor OS=Drosophila melanogaster GN=raptor PE=2 SV=1	18	0	22	0	0.167	0	36	3	53	3	0.255	0.011	18	0	26	0	0.121	0	0.0291006	CG4320
CG4453	LD46479p OS=Drosophila melanogaster GN=Nup153 PE=1 SV=4	26	0	35	0	0.232	0	37	4	65	5	0.27	0.018	18	0	37	0	0.111	0	0.0184139	CG4453
CG6593	Serine/threonine-protein phosphatase alpha-1 isoform OS=Drosophila melanogaster GN=Pp1alpha-96A PE=1 SV=1	16	2	42	3	0.416	0.083	33	0	75	0	0.621	0	18	0	76	0	0.349	0	0.0270833	CG6593
CG6932	COP9 signalosome complex subunit 6 OS=Drosophila melanogaster GN=CSN6 PE=1 SV=1	18	0	28	0	0.393	0	16	2	25	3	0.457	0.047	18	0	38	0	0.328	0	3.00755e-05	CG6932
CG9684	CG9684 OS=Drosophila melanogaster GN=CG9684 PE=1 SV=2	26	0	31	0	0.414	0	35	2	64	2	0.489	0.019	18	0	31	0	0.274	0	0.016355	CG9684
CG1737	CG1737 OS=Drosophila melanogaster GN=CG1737 PE=2 SV=1	26	2	46	6	0.293	0.033	33	11	62	18	0.367	0.078	17	13	31	24	0.224	0.116	0.0244054	CG1737
CG8937	AT07372p OS=Drosophila melanogaster GN=Hsc70-1 PE=2 SV=1	18	4	41	6	0.121	0.056	13	0	47	0	0.122	0	17	9	47	65	0.134	0.086	0.0134004	CG8937
CG9475	RE01104p OS=Drosophila melanogaster GN=Rpt3R PE=2 SV=2	16	0	52	0	0.351	0	15	4	27	5	0.247	0.042	17	6	52	20	0.188	0.084	0.00614576	CG9475
CG6846	RE17611p OS=Drosophila melanogaster GN=RpL26 PE=2 SV=1	15	9	87	26	0.503	0.416	25	8	47	24	0.591	0.228	17	5	34	40	0.557	0.268	0.0237593	CG6846
CG9124	Eukaryotic translation initiation factor 3 subunit H OS=Drosophila melanogaster GN=eIF-3p40 PE=1 SV=2	20	7	51	16	0.503	0.201	38	6	58	11	0.577	0.124	17	4	62	23	0.405	0.104	0.0479065	CG9124
CG10565	CG10565 OS=Drosophila melanogaster GN=CG10565 PE=1 SV=1	29	0	37	0	0.418	0	23	6	33	10	0.32	0.084	17	3	39	17	0.28	0.037	0.00739431	CG10565
CG8722	Nup44A, isoform A OS=Drosophila melanogaster GN=Nup44A PE=1 SV=1	7	0	10	0	0.229	0	33	2	56	2	0.508	0.068	17	3	30	11	0.271	0.068	0.0737479	CG8722
CG10726	Condensin complex subunit 2 OS=Drosophila melanogaster GN=barr PE=2 SV=1	18	0	28	0	0.303	0	19	0	26	0	0.267	0	17	2	40	4	0.2	0.034	2.30253e-05	CG10726
CG32575	Zinc finger protein hangover OS=Drosophila melanogaster GN=hang PE=1 SV=3	9	0	10	0	0.105	0	18	2	20	2	0.116	0.012	17	2	25	5	0.105	0.012	0.0184151	CG32575
CG12000	Proteasome subunit beta type-4 OS=Drosophila melanogaster GN=Prosbeta7 PE=1 SV=1	14	0	15	0	0.392	0	12	2	14	2	0.396	0.101	17	0	47	0	0.459	0	0.00215868	CG12000
CG13281	Exportin-2 OS=Drosophila melanogaster GN=Cas PE=1 SV=2	24	2	37	3	0.335	0.027	28	0	50	0	0.292	0	17	0	32	0	0.156	0	0.00841126	CG13281
CG1548	CathD OS=Drosophila melanogaster GN=cathD PE=2 SV=1	17	0	26	0	0.528	0	24	2	49	2	0.505	0.028	17	0	34	0	0.403	0	0.00529055	CG1548
CG17078	CG17078 OS=Drosophila melanogaster GN=CG17078-RA PE=1 SV=2	12	0	15	0	0.231	0	26	0	34	0	0.379	0	17	0	39	0	0.346	0	0.0232329	CG17078
CG1972	CG1972 OS=Drosophila melanogaster GN=CG1972 PE=2 SV=1	7	0	10	0	0.144	0	25	2	32	3	0.293	0.02	17	0	47	0	0.223	0	0.0463303	CG1972
CG2028	Ubiquitin carboxyl-terminal hydrolase 36 OS=Drosophila melanogaster GN=scny PE=1 SV=2	22	0	32	0	0.227	0	41	2	79	3	0.401	0.033	17	0	40	0	0.13	0	0.0348003	CG2028
CG3157	Tubulin gamma-1 chain OS=Drosophila melanogaster GN=gammaTub23C PE=1 SV=2	24	0	50	0	0.514	0	30	0	67	0	0.531	0	17	0	40	0	0.181	0	0.0121398	CG3157
CG3329	Proteasome subunit beta type OS=Drosophila melanogaster GN=Prosbeta2 PE=2 SV=1	15	0	30	0	0.39	0	16	3	34	5	0.474	0.062	17	0	28	0	0.445	0	0.000354004	CG3329
CG33546	GST-containing FLYWCH zinc-finger protein OS=Drosophila melanogaster GN=gfzf PE=1 SV=1	20	0	28	0	0.196	0	19	0	23	0	0.187	0	17	0	34	0	0.156	0	0.00111235	CG33546
CG3585	CG3585 OS=Drosophila melanogaster GN=Rbcn-3A PE=2 SV=2	2	0	2	0	0.01	0	42	0	51	0	0.135	0	17	0	33	0	0.059	0	0.111741	CG3585
CG6297	Chromosomal serine/threonine-protein kinase JIL-1 OS=Drosophila melanogaster GN=JIL-1 PE=1 SV=1	18	0	23	0	0.199	0	17	4	28	6	0.175	0.033	17	0	31	0	0.186	0	0.002345	CG6297
CG7660	Chorion peroxidase OS=Drosophila melanogaster GN=Pxt PE=2 SV=3	27	0	37	0	0.417	0	33	0	46	0	0.429	0	17	0	46	0	0.235	0	0.015752	CG7660
CG7927	BcDNA.GH11023 OS=Drosophila melanogaster GN=BcDNA.GH11023 PE=1 SV=1	7	0	11	0	0.148	0	17	3	24	6	0.287	0.057	17	0	39	0	0.202	0	0.0263777	CG7927
CG9325	Isoform B of Protein hu-li tai shao OS=Drosophila melanogaster GN=hts	23	0	29	0	0.428	0	31	0	60	0	0.379	0	17	0	33	0	0.221	0	0.0140632	CG9325
CG18743	Major heat shock 70 kDa protein Ab OS=Drosophila melanogaster GN=Hsp70Ab PE=1 SV=3	15	5	30	12	0.19	0.042	18	5	62	10	0.304	0.045	16	10	45	75	0.179	0.062	0.00696379	CG18743
CG31359	Major heat shock 70 kDa protein Bb OS=Drosophila melanogaster GN=Hsp70Bb PE=2 SV=2	13	5	28	12	0.172	0.042	17	5	60	10	0.303	0.045	16	10	45	75	0.179	0.062	0.00823908	CG31359
CG31366	Major heat shock 70 kDa protein Aa OS=Drosophila melanogaster GN=Hsp70Aa PE=2 SV=2	15	5	30	12	0.19	0.042	18	5	62	10	0.304	0.045	16	10	45	75	0.179	0.062	0.00696379	CG31366
CG31449	Major heat shock 70 kDa protein Ba OS=Drosophila melanogaster GN=Hsp70Ba PE=2 SV=2	13	5	28	12	0.172	0.042	17	5	60	10	0.303	0.045	16	10	45	75	0.179	0.062	0.00823908	CG31449
CG5834	Major heat shock 70 kDa protein Bbb OS=Drosophila melanogaster GN=Hsp70Bbb PE=2 SV=2	13	5	28	12	0.172	0.042	17	5	60	10	0.303	0.045	16	10	45	75	0.179	0.062	0.00823908	CG5834
CG6489	Major heat shock 70 kDa protein Bc OS=Drosophila melanogaster GN=Hsp70Bc PE=2 SV=2	13	5	28	12	0.172	0.042	17	5	60	10	0.303	0.045	16	10	45	75	0.179	0.062	0.00823908	CG6489
CG5502	60S ribosomal protein L4 OS=Drosophila melanogaster GN=RpL4 PE=2 SV=2	47	16	194	428	0.539	0.347	35	11	56	29	0.566	0.115	16	8	37	22	0.249	0.17	0.0690039	CG5502
CG4046	40S ribosomal protein S16 OS=Drosophila melanogaster GN=RpS16 PE=2 SV=1	11	5	79	30	0.453	0.304	25	9	50	35	0.743	0.284	16	7	48	46	0.574	0.27	0.0593494	CG4046
CG9327	Proteasome subunit alpha type-4 OS=Drosophila melanogaster GN=Pros29 PE=1 SV=2	17	3	35	7	0.568	0.087	14	4	23	8	0.557	0.072	16	6	40	21	0.455	0.14	0.000406618	CG9327
CG7230	LD16058p OS=Drosophila melanogaster GN=rib PE=1 SV=1	17	0	27	0	0.247	0	30	3	57	3	0.359	0.035	16	5	36	6	0.234	0.079	0.0223352	CG7230
CG3605	CG3605 OS=Drosophila melanogaster GN=CG3605 PE=1 SV=2	15	0	27	0	0.248	0	21	0	37	0	0.276	0	16	4	34	13	0.152	0.053	0.00155988	CG3605
CG12052	Isoform D of Longitudinals lacking protein, isoforms A/B/D/L OS=Drosophila melanogaster GN=lola	25	0	81	0	0.348	0	25	6	40	7	0.248	0.061	16	3	34	7	0.123	0.048	0.00502271	CG12052
CG8409	Heterochromatin protein 1 OS=Drosophila melanogaster GN=Su(var)205 PE=1 SV=2	14	0	26	0	0.515	0	17	4	33	8	0.573	0.17	16	3	30	13	0.461	0.17	0.000636789	CG8409
CG1404	GTP-binding nuclear protein Ran OS=Drosophila melanogaster GN=ran PE=1 SV=1	20	4	159	13	0.556	0.208	32	0	66	0	0.611	0	16	2	28	24	0.329	0.097	0.0217743	CG1404
CG2241	Rpt6R OS=Drosophila melanogaster GN=Rpt6R PE=1 SV=1	10	2	46	6	0.19	0.065	14	3	49	6	0.251	0.09	16	2	78	5	0.266	0.04	0.0108208	CG2241
CG3125	CG3125, isoform A OS=Drosophila melanogaster GN=l(1)G0060 PE=2 SV=2	26	0	33	0	0.223	0	51	0	93	0	0.274	0	16	2	33	4	0.108	0.014	0.0498662	CG3125
CG7061	Rab3 GTPase-activating protein regulatory subunit OS=Drosophila melanogaster GN=rab3-GAP PE=1 SV=2	10	0	11	0	0.151	0	43	6	73	7	0.26	0.038	16	2	31	3	0.115	0.013	0.0898991	CG7061
CG8340	GTP-binding protein 128up OS=Drosophila melanogaster GN=128up PE=1 SV=2	18	0	24	0	0.514	0	20	4	41	4	0.508	0.087	16	2	27	2	0.277	0.041	0.000304092	CG8340
CG11154	ATP synthase subunit beta, mitochondrial OS=Drosophila melanogaster GN=ATPsyn-beta PE=1 SV=3	25	0	37	0	0.648	0	31	2	52	2	0.578	0.048	16	0	49	0	0.248	0	0.0153618	CG11154
CG12891	LD31742p OS=Drosophila melanogaster GN=whd PE=1 SV=1	15	0	25	0	0.228	0	29	0	48	0	0.397	0	16	0	36	0	0.141	0	0.0236295	CG12891
CG31137	AT23187p OS=Drosophila melanogaster GN=twin PE=2 SV=2	18	0	25	0	0.417	0	34	0	61	0	0.466	0	16	0	32	0	0.161	0	0.0288671	CG31137
CG3506	ATP-dependent RNA helicase vasa, isoform A OS=Drosophila melanogaster GN=vas PE=1 SV=3	6	0	8	0	0.109	0	20	2	29	2	0.265	0.014	16	0	40	0	0.245	0	0.0408453	CG3506
CG41099	CG41099, isoform B OS=Drosophila melanogaster GN=CG41099 PE=4 SV=1	16	0	23	0	0.199	0	17	0	34	0	0.167	0	16	0	44	0	0.186	0	0.000208117	CG41099
CG5092	Target of rapamycin OS=Drosophila melanogaster GN=Tor PE=1 SV=1	21	0	26	0	0.126	0	45	2	65	2	0.172	0.008	16	0	23	0	0.077	0	0.0478995	CG5092
CG5222	CG5222 OS=Drosophila melanogaster GN=CG5222 PE=1 SV=1	7	0	10	0	0.168	0	29	0	47	0	0.375	0	16	0	33	0	0.162	0	0.0565748	CG5222
CG6197	CG6197 OS=Drosophila melanogaster GN=CG6197 PE=1 SV=1	6	0	6	0	0.069	0	37	4	51	7	0.304	0.031	16	0	43	0	0.159	0	0.0900999	CG6197
CG7182	CG7182 OS=Drosophila melanogaster GN=CG7182 PE=1 SV=2	26	0	56	0	0.558	0	33	0	126	0	0.491	0	16	0	51	0	0.285	0	0.0183989	CG7182
CG9591	AT14917p OS=Drosophila melanogaster GN=omd PE=2 SV=2	6	0	8	0	0.088	0	27	0	51	0	0.23	0	16	0	41	0	0.113	0	0.0573173	CG9591
CG2158	CG2158 OS=Drosophila melanogaster GN=Nup50 PE=1 SV=1	17	0	24	0	0.328	0	41	5	56	5	0.571	0.046	15	7	37	19	0.255	0.147	0.0640434	CG2158
CG4153	Eukaryotic translation initiation factor 2 subunit 2 OS=Drosophila melanogaster GN=eIF-2beta PE=1 SV=1	6	0	10	0	0.157	0	17	13	31	23	0.256	0.272	15	6	35	11	0.295	0.135	0.1396	CG4153
CG5920	40S ribosomal protein S2 OS=Drosophila melanogaster GN=sop PE=1 SV=2	35	7	94	10	0.524	0.21	30	3	60	6	0.539	0.082	15	5	38	20	0.345	0.135	0.0321237	CG5920
CG9012	Clathrin heavy chain OS=Drosophila melanogaster GN=Chc PE=1 SV=1	37	0	52	0	0.29	0	27	5	38	7	0.178	0.029	15	5	24	21	0.099	0.033	0.0302171	CG9012
CG15119	LD06557p OS=Drosophila melanogaster GN=mip40 PE=1 SV=1	12	0	15	0	0.39	0	12	5	19	9	0.446	0.112	15	4	69	6	0.363	0.161	0.00411596	CG15119
CG12262	Probable medium-chain specific acyl-CoA dehydrogenase, mitochondrial OS=Drosophila melanogaster GN=CG12262 PE=1 SV=1	9	0	13	0	0.327	0	17	5	33	6	0.389	0.088	15	2	29	4	0.277	0.05	0.0114902	CG12262
CG2033	40S ribosomal protein S15Aa OS=Drosophila melanogaster GN=RpS15Aa PE=2 SV=2	17	4	58	25	0.592	0.277	23	0	58	0	0.738	0	15	2	54	16	0.646	0.146	0.00493784	CG2033
CG32211	Transcription initiation factor TFIID subunit 6 OS=Drosophila melanogaster GN=Taf6 PE=1 SV=2	20	0	26	0	0.417	0	29	4	49	4	0.477	0.091	15	2	36	10	0.248	0.033	0.0170475	CG32211
CG3416	26S proteasome non-ATPase regulatory subunit 7 OS=Drosophila melanogaster GN=Mov34 PE=1 SV=6	27	2	47	8	0.482	0.068	46	2	81	3	0.657	0.038	15	2	40	8	0.32	0.038	0.0469544	CG3416
CG7769	DNA damage-binding protein 1 OS=Drosophila melanogaster GN=pic PE=1 SV=1	16	0	23	0	0.213	0	45	3	84	3	0.336	0.019	15	2	30	6	0.132	0.015	0.0684129	CG7769
CG9330	CG9330 OS=Drosophila melanogaster GN=CG9330-RA PE=1 SV=1	21	0	29	0	0.305	0	48	7	101	11	0.384	0.072	15	2	39	5	0.209	0.032	0.063753	CG9330
CG18000	Isoform 5b of Cytoplasmic dynein 1 intermediate chain OS=Drosophila melanogaster GN=sw	10	0	10	0	0.225	0	14	0	24	0	0.282	0	15	0	42	0	0.274	0	0.0067636	CG18000
CG2048	Discs overgrown protein kinase OS=Drosophila melanogaster GN=dco PE=1 SV=2	16	2	39	2	0.384	0.052	34	2	98	4	0.35	0.016	15	0	70	0	0.186	0	0.0397316	CG2048
CG2708	Translocase of outer membrane 34 OS=Drosophila melanogaster GN=unc-45 PE=2 SV=1	27	0	31	0	0.365	0	24	3	31	7	0.247	0.024	15	0	42	0	0.168	0	0.0108965	CG2708
CG3510	Isoform C of G2/mitotic-specific cyclin-B OS=Drosophila melanogaster GN=CycB	7	0	13	0	0.254	0	16	3	23	6	0.28	0.06	15	0	34	0	0.166	0	0.0212608	CG3510
CG7471	Histone deacetylase Rpd3 OS=Drosophila melanogaster GN=Rpd3 PE=1 SV=2	11	0	17	0	0.321	0	35	3	62	6	0.38	0.052	15	0	35	0	0.213	0	0.0593603	CG7471
CG9934	CG9934, isoform A OS=Drosophila melanogaster GN=CG9934 PE=1 SV=1	11	0	13	0	0.102	0	22	0	29	0	0.224	0	15	0	50	0	0.103	0	0.0190371	CG9934
CG2031	Hpr1 OS=Drosophila melanogaster GN=Hpr1 PE=1 SV=1	21	0	36	0	0.362	0	41	4	55	5	0.411	0.049	14	6	24	15	0.133	0.064	0.0533471	CG2031
CG3661	60S ribosomal protein L23 OS=Drosophila melanogaster GN=RpL23 PE=1 SV=2	11	7	305	111	0.529	0.364	32	5	234	6	0.657	0.3	14	4	72	24	0.529	0.193	0.0852005	CG3661
CG4003	RuvB-like helicase 1 OS=Drosophila melanogaster GN=pont PE=1 SV=1	30	5	58	12	0.596	0.125	44	10	72	22	0.596	0.112	14	4	75	15	0.191	0.07	0.0558101	CG4003
CG17437	Protein will die slowly OS=Drosophila melanogaster GN=wds PE=2 SV=1	14	4	19	5	0.468	0.152	16	5	23	10	0.438	0.105	14	3	21	11	0.429	0.086	0.000150376	CG17437
CG1825	LD02709p OS=Drosophila melanogaster GN=Map60 PE=1 SV=1	14	0	24	0	0.341	0	25	0	37	0	0.461	0	14	3	31	4	0.214	0.068	0.0186846	CG1825
CG18495	Proteasome subunit alpha type-6 OS=Drosophila melanogaster GN=Prosalpha1 PE=2 SV=2	13	0	13	0	0.471	0	22	0	31	0	0.5	0	14	2	24	4	0.316	0.086	0.0131755	CG18495
CG2980	THO complex subunit 5 OS=Drosophila melanogaster GN=thoc5 PE=1 SV=2	15	2	24	2	0.25	0.036	24	0	49	0	0.265	0	14	2	30	2	0.133	0.032	0.0156804	CG2980
CG30382	Proteasome subunit alpha type OS=Drosophila melanogaster GN=CG30382 PE=3 SV=1	13	0	13	0	0.471	0	22	0	31	0	0.5	0	14	2	24	4	0.316	0.086	0.0131755	CG30382
CG9022	Dolichyl-diphosphooligosaccharide--protein glycosyltransferase 48 kDa subunit OS=Drosophila melanogaster GN=Ost48 PE=2 SV=2	11	0	14	0	0.356	0	18	6	41	10	0.332	0.1	14	2	32	19	0.332	0.024	0.00638085	CG9022
CG9748	ATP-dependent RNA helicase bel OS=Drosophila melanogaster GN=bel PE=1 SV=1	12	0	13	0	0.177	0	39	3	70	3	0.373	0.024	14	2	41	5	0.163	0.026	0.073265	CG9748
CG10392	O-glycosyltransferase OS=Drosophila melanogaster GN=sxc PE=1 SV=1	17	0	23	0	0.216	0	18	0	27	0	0.212	0	14	0	30	0	0.179	0	0.00268541	CG10392
CG1244	MEP-1, isoform A OS=Drosophila melanogaster GN=MEP-1 PE=1 SV=1	6	0	7	0	0.085	0	15	3	25	6	0.143	0.021	14	0	25	0	0.122	0	0.0258585	CG1244
CG14299	Ectopic P granules protein 5 homolog OS=Drosophila melanogaster GN=CG14299 PE=1 SV=2	6	0	8	0	0.055	0	38	2	44	5	0.141	0.008	14	0	26	0	0.056	0	0.0955847	CG14299
CG15433	Probable elongator complex protein 3 OS=Drosophila melanogaster GN=Elp3 PE=2 SV=1	19	0	25	0	0.299	0	25	0	33	0	0.337	0	14	0	24	0	0.223	0	0.0130004	CG15433
CG1994	Polycomb protein l(1)G0020 OS=Drosophila melanogaster GN=l(1)G0020 PE=1 SV=2	44	5	84	12	0.427	0.063	40	3	78	3	0.421	0.021	14	0	25	0	0.144	0	0.041254	CG1994
CG2095	Exocyst complex component 4 OS=Drosophila melanogaster GN=sec8 PE=1 SV=3	0	0	0	0	0	0	17	2	24	2	0.207	0.02	14	0	28	0	0.128	0	0.102343	CG2095
CG32697	LD27988p OS=Drosophila melanogaster GN=l(1)G0232 PE=2 SV=2	6	0	7	0	0.097	0	14	0	21	0	0.191	0	14	0	24	0	0.126	0	0.0255763	CG32697
CG4901	CG4901 OS=Drosophila melanogaster GN=CG4901 PE=2 SV=2	12	0	15	0	0.207	0	29	0	36	0	0.304	0	14	0	31	0	0.196	0	0.0379945	CG4901
CG4972	CG4972 OS=Drosophila melanogaster GN=CG4972 PE=1 SV=2	17	0	24	0	0.276	0	22	3	33	3	0.319	0.034	14	0	26	0	0.127	0	0.00487992	CG4972
CG5330	LD21576p OS=Drosophila melanogaster GN=Nap1 PE=2 SV=1	10	0	12	0	0.214	0	20	0	26	0	0.438	0	14	0	33	0	0.27	0	0.0185431	CG5330
CG6453	CG6453 OS=Drosophila melanogaster GN=CG6453 PE=1 SV=1	18	0	33	0	0.458	0	18	2	41	2	0.339	0.024	14	0	50	0	0.277	0	0.000943998	CG6453
CG6842	BcDNA.GH02678 OS=Drosophila melanogaster GN=Vps4 PE=1 SV=1	15	0	22	0	0.342	0	19	2	52	10	0.321	0.043	14	0	27	0	0.219	0	0.00195002	CG6842
CG7698	Cleavage and polyadenylation specificity factor 73 OS=Drosophila melanogaster GN=Cpsf73 PE=1 SV=2	11	0	15	0	0.212	0	24	0	34	0	0.325	0	14	0	24	0	0.178	0	0.0266529	CG7698
CG8211	CG8211 OS=Drosophila melanogaster GN=CG8211 PE=2 SV=2	11	0	14	0	0.137	0	48	0	95	0	0.329	0	14	0	33	0	0.11	0	0.0883779	CG8211
CG9696	Helicase domino OS=Drosophila melanogaster GN=dom PE=1 SV=2	13	0	14	0	0.058	0	20	6	26	7	0.084	0.018	14	0	21	0	0.044	0	0.00506008	CG9696
CG5436	Heat shock protein 68 OS=Drosophila melanogaster GN=Hsp68 PE=1 SV=1	7	5	18	12	0.044	0.043	7	5	38	10	0.115	0.046	13	10	36	75	0.113	0.063	0.211156	CG5436
CG10279	ATP-dependent RNA helicase p62 OS=Drosophila melanogaster GN=Rm62 PE=1 SV=3	16	3	21	7	0.238	0.05	30	7	46	11	0.362	0.074	13	6	58	12	0.186	0.083	0.0524913	CG10279
CG1263	60S ribosomal protein L8 OS=Drosophila melanogaster GN=RpL8 PE=2 SV=1	17	9	35	15	0.277	0.266	19	7	30	7	0.434	0.234	13	5	32	36	0.195	0.148	0.00795108	CG1263
CG18212	Aluminum tubes, isoform A OS=Drosophila melanogaster GN=alt PE=1 SV=1	14	0	16	0	0.232	0	33	8	47	8	0.316	0.08	13	5	18	18	0.166	0.065	0.0627987	CG18212
CG1685	Protein penguin OS=Drosophila melanogaster GN=pen PE=2 SV=1	12	0	14	0	0.199	0	27	10	35	25	0.335	0.081	13	4	40	10	0.163	0.049	0.0515803	CG1685
CG18332	COP9 signalosome complex subunit 3 OS=Drosophila melanogaster GN=CSN3 PE=1 SV=2	14	2	18	3	0.285	0.063	18	4	29	7	0.355	0.049	13	4	23	13	0.22	0.07	0.00401889	CG18332
CG2807	CG2807 OS=Drosophila melanogaster GN=CG2807 PE=1 SV=2	11	0	14	0	0.107	0	26	3	48	3	0.206	0.013	13	4	20	9	0.123	0.031	0.0423709	CG2807
CG6773	Sec13 OS=Drosophila melanogaster GN=sec13 PE=2 SV=1	6	0	7	0	0.121	0	11	0	12	0	0.216	0	13	3	35	8	0.154	0.093	0.0161642	CG6773
CG33106	Ankyrin repeat and KH domain-containing protein mask OS=Drosophila melanogaster GN=mask PE=1 SV=2	9	0	11	0	0.045	0	21	0	28	0	0.084	0	13	2	33	3	0.046	0.006	0.0280524	CG33106
CG3379;	Histone H4 OS=Drosophila melanogaster GN=His4 PE=1 SV=2	9	2	13	2	0.427	0.214	10	0	11	0	0.524	0	13	2	33	38	0.524	0.194	0.00286495	CG3379;
CG3422	Proteasome subunit alpha type-7-1 OS=Drosophila melanogaster GN=Pros28.1 PE=1 SV=2	13	2	47	2	0.514	0.104	26	0	45	0	0.55	0	13	2	30	4	0.345	0.044	0.031499	CG3422
CG3480	LD07342p OS=Drosophila melanogaster GN=mip130 PE=1 SV=3	15	0	27	0	0.155	0	20	0	28	0	0.232	0	13	2	25	2	0.123	0.025	0.00588989	CG3480
CG5271	Ubiquitin-40S ribosomal protein S27a OS=Drosophila melanogaster GN=RpS27A PE=1 SV=2	8	4	22	7	0.449	0.224	13	3	18	6	0.429	0.16	13	2	42	7	0.571	0.115	0.0136745	CG5271
CG9156	Serine/threonine-protein phosphatase alpha-3 isoform OS=Drosophila melanogaster GN=Pp1-13C PE=1 SV=1	14	2	35	3	0.328	0.06	21	0	32	0	0.397	0	13	2	42	11	0.219	0.063	0.0111115	CG9156
CG11123	CG11123 OS=Drosophila melanogaster GN=CG11123 PE=2 SV=1	15	0	24	0	0.224	0	26	0	33	0	0.341	0	13	0	23	0	0.189	0	0.023447	CG11123
CG12276	Aos1 OS=Drosophila melanogaster GN=Aos1 PE=2 SV=1	14	0	24	0	0.501	0	16	3	21	4	0.516	0.098	13	0	20	0	0.404	0	0.000303623	CG12276
CG12357	Nuclear cap-binding protein subunit 2 OS=Drosophila melanogaster GN=Cbp20 PE=1 SV=1	9	2	24	6	0.494	0.156	6	0	9	0	0.227	0	13	0	25	0	0.299	0	0.0198858	CG12357
CG12499	CG12499 OS=Drosophila melanogaster GN=CG12499 PE=1 SV=2	14	0	18	0	0.1	0	39	0	58	0	0.181	0	13	0	23	0	0.069	0	0.061285	CG12499
CG13345	Tumbleweed OS=Drosophila melanogaster GN=tum PE=4 SV=1	19	0	36	0	0.334	0	11	0	16	0	0.227	0	13	0	32	0	0.238	0	0.013495	CG13345
CG17252	BCL7-like OS=Drosophila melanogaster GN=BCL7-like PE=1 SV=1	7	0	9	0	0.643	0	8	0	12	0	0.649	0	13	0	29	0	0.286	0	0.0186701	CG17252
CG1751	Signal peptidase complex subunit 2 OS=Drosophila melanogaster GN=Spase25 PE=2 SV=1	5	0	7	0	0.286	0	10	0	17	0	0.397	0	13	0	27	0	0.402	0	0.0285955	CG1751
CG2097	LD45768p OS=Drosophila melanogaster GN=Sym PE=1 SV=1	7	0	10	0	0.089	0	22	0	28	0	0.181	0	13	0	25	0	0.107	0	0.0423957	CG2097
CG3423	LD34181p OS=Drosophila melanogaster GN=SA PE=2 SV=2	22	0	26	0	0.21	0	43	0	60	0	0.305	0	13	0	35	0	0.125	0	0.0498468	CG3423
CG3696	KISMET-L long isoform OS=Drosophila melanogaster GN=kis PE=2 SV=3	11	0	13	0	0.035	0	23	3	34	4	0.067	0.006	13	0	17	0	0.033	0	0.025091	CG3696
CG5444	Transcription initiation factor TFIID subunit 4 OS=Drosophila melanogaster GN=Taf4 PE=1 SV=1	15	2	21	5	0.161	0.026	16	6	22	7	0.219	0.035	13	0	24	0	0.14	0	0.00471711	CG5444
CG5505	Isoform F of Ubiquitin carboxyl-terminal hydrolase 36 OS=Drosophila melanogaster GN=scny	16	0	22	0	0.193	0	24	7	37	9	0.201	0.088	13	0	30	0	0.092	0	0.0114513	CG5505
CG6721	GTPase-activating protein OS=Drosophila melanogaster GN=Gap1 PE=2 SV=2	18	0	24	0	0.169	0	22	2	30	2	0.193	0.021	13	0	21	0	0.103	0	0.00882048	CG6721
CG6768	DNA polymerase OS=Drosophila melanogaster GN=DNApol-epsilon PE=1 SV=3	5	0	6	0	0.051	0	31	2	47	2	0.156	0.004	13	0	29	0	0.08	0	0.0887888	CG6768
CG7003	Probable DNA mismatch repair protein Msh6 OS=Drosophila melanogaster GN=Msh6 PE=1 SV=2	17	0	24	0	0.192	0	25	2	30	5	0.208	0.006	13	0	33	0	0.121	0	0.016904	CG7003
CG7008	LD20211p OS=Drosophila melanogaster GN=Tudor-SN PE=1 SV=1	29	8	32	14	0.278	0.095	26	2	40	2	0.245	0.026	13	0	23	0	0.141	0	0.0202254	CG7008
CG7010	GM13002p OS=Drosophila melanogaster GN=l(1)G0334 PE=1 SV=2	15	0	23	0	0.449	0	13	4	20	4	0.358	0.095	13	0	33	0	0.268	0	0.00198992	CG7010
CG7855	Timeout OS=Drosophila melanogaster GN=timeout PE=1 SV=2	4	0	4	0	0.046	0	19	0	28	0	0.124	0	13	0	29	0	0.092	0	0.0552504	CG7855
CG8378	BcDNA.LD29892 OS=Drosophila melanogaster GN=BcDNA.LD29892 PE=2 SV=1	13	0	20	0	0.335	0	21	0	33	0	0.337	0	13	0	28	0	0.171	0	0.0138856	CG8378
CG8454	RE66051p OS=Drosophila melanogaster GN=Vps16A PE=2 SV=1	3	0	4	0	0.042	0	19	0	34	0	0.191	0	13	0	21	0	0.174	0	0.0648059	CG8454
CG9191	Bipolar kinesin KRP-130 OS=Drosophila melanogaster GN=Klp61F PE=1 SV=2	15	0	21	0	0.195	0	24	2	38	5	0.258	0.023	13	0	23	0	0.163	0	0.017317	CG9191
CG9412	AT27578p OS=Drosophila melanogaster GN=rin PE=2 SV=1	12	3	18	4	0.181	0.057	15	0	28	0	0.232	0	13	0	27	0	0.171	0	0.000408453	CG9412
CG9433	Xeroderma pigmentosum D, isoform A OS=Drosophila melanogaster GN=Xpd PE=2 SV=1	17	0	31	0	0.32	0	26	0	34	0	0.33	0	13	0	33	0	0.177	0	0.0199451	CG9433
CG13389	40S ribosomal protein S13 OS=Drosophila melanogaster GN=RpS13 PE=2 SV=3	13	8	53	34	0.291	0.305	21	3	31	4	0.543	0.205	12	6	28	26	0.252	0.185	0.0286072	CG13389
CG14792	Isoform A of 40S ribosomal protein SA OS=Drosophila melanogaster GN=sta	22	5	147	14	0.696	0.237	45	5	112	6	0.826	0.163	12	5	23	33	0.433	0.13	0.0803256	CG14792
CG17521	60S ribosomal protein L10 OS=Drosophila melanogaster GN=Qm PE=2 SV=1	22	0	394	0	0.463	0	28	3	66	4	0.601	0.11	12	5	40	16	0.376	0.165	0.0252766	CG17521
CG1938	Dynein light intermediate chain, isoform A OS=Drosophila melanogaster GN=Dlic PE=2 SV=2	21	0	41	0	0.383	0	24	6	64	14	0.397	0.113	12	5	33	21	0.235	0.091	0.0163	CG1938
CG9765	Transforming acidic coiled-coil protein, isoform D OS=Drosophila melanogaster GN=tacc PE=1 SV=1	20	0	24	0	0.22	0	16	7	23	12	0.147	0.046	12	5	17	7	0.149	0.036	0.00925948	CG9765
CG14637	ATP-dependent RNA helicase abstrakt OS=Drosophila melanogaster GN=abs PE=1 SV=1	18	5	26	12	0.312	0.073	21	6	44	10	0.331	0.105	12	4	23	10	0.212	0.055	0.0199974	CG14637
CG7808	40S ribosomal protein S8 OS=Drosophila melanogaster GN=RpS8 PE=1 SV=1	25	10	120	112	0.562	0.365	22	3	33	4	0.572	0.062	12	4	32	44	0.404	0.168	0.024921	CG7808
CG10206	CG10206-PA OS=Drosophila melanogaster GN=nop5 PE=1 SV=2	36	8	68	24	0.538	0.221	36	8	53	16	0.554	0.086	12	3	27	8	0.249	0.057	0.0539728	CG10206
CG2051	CG2051 OS=Drosophila melanogaster GN=CG2051 PE=2 SV=1	27	3	72	11	0.526	0.086	19	0	32	0	0.358	0	12	3	27	5	0.207	0.069	0.0254179	CG2051
CG31196	Isoform C of 14-3-3 protein epsilon OS=Drosophila melanogaster GN=14-3-3epsilon	18	0	26	0	0.539	0	6	2	11	2	0.281	0.086	12	3	43	11	0.234	0.117	0.0441666	CG31196
CG6375	Probable ATP-dependent RNA helicase pitchoune OS=Drosophila melanogaster GN=pit PE=2 SV=2	12	0	16	0	0.226	0	20	3	29	6	0.238	0.037	12	3	21	6	0.154	0.043	0.0147399	CG6375
CG10990	CG10990, isoform A OS=Drosophila melanogaster GN=CG10990 PE=1 SV=2	25	0	60	0	0.552	0	23	0	35	0	0.417	0	12	2	37	4	0.169	0.029	0.018968	CG10990
CG18608	Non-histone chromosomal protein Prod OS=Drosophila melanogaster GN=prod PE=1 SV=1	9	0	10	0	0.332	0	18	8	25	12	0.529	0.124	12	2	20	7	0.364	0.049	0.0271919	CG18608
CG8036	CG8036, isoform B OS=Drosophila melanogaster GN=CG8036 PE=1 SV=3	18	0	27	0	0.372	0	24	2	35	2	0.353	0.021	12	2	48	2	0.155	0.035	0.0182523	CG8036
CG8426	LD13864p OS=Drosophila melanogaster GN=l(2)NC136 PE=1 SV=1	12	0	18	0	0.162	0	19	0	30	0	0.21	0	12	2	22	2	0.127	0.025	0.0106094	CG8426
CG9900	Centromere/kinetochore protein zw10 OS=Drosophila melanogaster GN=mit(1)15 PE=1 SV=2	14	0	19	0	0.354	0	27	5	42	6	0.352	0.05	12	2	32	4	0.119	0.022	0.0358008	CG9900
CG10506	Probable glutaminyl-tRNA synthetase OS=Drosophila melanogaster GN=Aats-gln PE=1 SV=1	15	0	20	0	0.26	0	21	0	31	0	0.244	0	12	0	34	0	0.174	0	0.0131355	CG10506
CG10535	Putative elongator complex protein 1 OS=Drosophila melanogaster GN=CG10535 PE=1 SV=2	6	0	9	0	0.065	0	26	0	52	0	0.221	0	12	0	23	0	0.097	0	0.0658646	CG10535
CG12005	GH06271p OS=Drosophila melanogaster GN=Mms19 PE=2 SV=1	18	0	25	0	0.2	0	27	0	44	0	0.266	0	12	0	18	0	0.109	0	0.0244051	CG12005
CG12324	40S ribosomal protein S15Ab OS=Drosophila melanogaster GN=RpS15Ab PE=2 SV=3	10	3	41	16	0.462	0.2	15	0	40	0	0.554	0	12	0	43	0	0.462	0	0.00225401	CG12324
CG13387	Exportin-1 OS=Drosophila melanogaster GN=emb PE=1 SV=1	22	0	31	0	0.314	0	20	0	47	0	0.185	0	12	0	20	0	0.119	0	0.0138094	CG13387
CG1651	Ankyrin, isoform A OS=Drosophila melanogaster GN=Ank PE=1 SV=1	0	0	0	0	0	0	12	0	16	0	0.103	0	12	0	18	0	0.057	0	0.0917517	CG1651
CG2941	CG2941 OS=Drosophila melanogaster GN=CG2941 PE=1 SV=2	4	0	6	0	0.057	0	15	0	25	0	0.156	0	12	0	17	0	0.15	0	0.0439203	CG2941
CG32491	Isoform 55.6 of Modifier of mdg4 OS=Drosophila melanogaster GN=mod(mdg4)	14	0	73	0	0.396	0	16	9	31	17	0.352	0.146	12	0	22	0	0.22	0	0.0262275	CG32491
CG32823	Sperm-specific dynein intermediate chain 3 OS=Drosophila melanogaster GN=Sdic3 PE=2 SV=2	6	0	6	0	0.202	0	8	0	13	0	0.256	0	12	0	34	0	0.276	0	0.0195062	CG32823
CG33497	Sperm-specific dynein intermediate chain 2 OS=Drosophila melanogaster GN=Sdic2 PE=2 SV=1	8	0	8	0	0.199	0	7	0	12	0	0.215	0	12	0	32	0	0.236	0	0.0138094	CG33497
CG34422	CG34422, isoform A OS=Drosophila melanogaster GN=CG34422 PE=1 SV=3	9	0	13	0	0.064	0	14	2	20	4	0.087	0.013	12	0	24	0	0.081	0	0.0038825	CG34422
CG3885	Exocyst complex component 1 OS=Drosophila melanogaster GN=sec3 PE=1 SV=2	8	0	10	0	0.146	0	25	2	41	3	0.263	0.022	12	0	20	0	0.181	0	0.0527338	CG3885
CG3936	Neurogenic locus Notch protein OS=Drosophila melanogaster GN=N PE=1 SV=3	17	0	21	0	0.104	0	6	0	12	0	0.025	0	12	0	20	0	0.056	0	0.0334577	CG3936
CG4062	Valyl-tRNA synthetase, isoform A OS=Drosophila melanogaster GN=Aats-val PE=1 SV=1	5	0	6	0	0.082	0	23	0	31	0	0.232	0	12	0	22	0	0.12	0	0.0629394	CG4062
CG4943	E3 ubiquitin-protein ligase Smurf1 OS=Drosophila melanogaster GN=lack PE=1 SV=3	13	0	18	0	0.129	0	23	5	41	8	0.211	0.06	12	0	23	0	0.151	0	0.0187602	CG4943
CG5175	Kugelkern, isoform A OS=Drosophila melanogaster GN=kuk PE=1 SV=1	12	0	21	0	0.389	0	21	4	46	6	0.36	0.051	12	0	29	0	0.132	0	0.0148037	CG5175
CG6335	GH22474p OS=Drosophila melanogaster GN=Aats-his PE=2 SV=1	18	0	23	0	0.345	0	9	2	12	2	0.17	0.044	12	0	22	0	0.222	0	0.0181841	CG6335
CG7246	CG7246 OS=Drosophila melanogaster GN=CG7246 PE=1 SV=1	9	0	10	0	0.206	0	11	0	12	0	0.163	0	12	0	26	0	0.188	0	0.00338332	CG7246
CG7254	Glycogen phosphorylase OS=Drosophila melanogaster GN=GlyP PE=2 SV=2	14	0	17	0	0.243	0	21	2	40	2	0.232	0.014	12	0	20	0	0.142	0	0.0129978	CG7254
CG7538	DNA replication licensing factor Mcm2 OS=Drosophila melanogaster GN=Mcm2 PE=1 SV=1	13	0	15	0	0.218	0	27	0	41	0	0.315	0	12	0	34	0	0.156	0	0.0349723	CG7538
CG7581	Bub3 OS=Drosophila melanogaster GN=Bub3 PE=1 SV=1	25	3	47	5	0.653	0.083	16	2	26	3	0.491	0.031	12	0	34	0	0.215	0	0.0235048	CG7581
CG7664	Activator protein 4 OS=Drosophila melanogaster GN=crp PE=2 SV=1	17	0	24	0	0.326	0	9	0	14	0	0.187	0	12	0	27	0	0.252	0	0.0161493	CG7664
CG8573	Protein suppressor of hairy wing OS=Drosophila melanogaster GN=su(Hw) PE=1 SV=2	11	0	11	0	0.089	0	19	0	35	0	0.185	0	12	0	21	0	0.137	0	0.0154133	CG8573
CG9601	CG9601 OS=Drosophila melanogaster GN=CG9601-RA PE=2 SV=2	7	0	8	0	0.132	0	23	0	30	0	0.409	0	12	0	25	0	0.245	0	0.0487782	CG9601
CG8274	Megator OS=Drosophila melanogaster GN=Mtor PE=1 SV=1	11	0	15	0	0.079	0	9	15	10	19	0.047	0.052	11	13	18	48	0.049	0.057	0.426033	CG8274
CG10652	RE25263p OS=Drosophila melanogaster GN=RpL30 PE=2 SV=1	7	4	119	61	0.586	0.423	13	3	19	4	0.631	0.162	11	5	20	34	0.667	0.279	0.0289304	CG10652
CG42551	La-related protein OS=Drosophila melanogaster GN=larp PE=1 SV=4	23	0	47	0	0.255	0	23	6	40	10	0.172	0.029	11	5	27	17	0.147	0.064	0.0220528	CG42551
CG6386	Nucleosomal histone kinase 1 OS=Drosophila melanogaster GN=ball PE=1 SV=1	22	2	54	2	0.334	0.037	12	4	17	9	0.194	0.037	11	5	29	18	0.18	0.092	0.0381049	CG6386
CG7977	FI01658p OS=Drosophila melanogaster GN=RpL23A PE=2 SV=1	24	4	114	8	0.365	0.155	18	8	39	11	0.372	0.173	11	5	28	56	0.195	0.13	0.0370151	CG7977
CG12304	Probable aminoacyl tRNA synthase complex-interacting multifunctional protein 2 OS=Drosophila melanogaster GN=CG12304 PE=1 SV=1	15	2	50	2	0.41	0.063	31	0	55	0	0.62	0	11	4	30	6	0.183	0.081	0.0518941	CG12304
CG18174	26S proteasome non-ATPase regulatory subunit 14 OS=Drosophila melanogaster GN=Rpn11 PE=1 SV=1	20	4	91	10	0.471	0.14	29	0	111	0	0.607	0	11	3	21	8	0.24	0.091	0.0349511	CG18174
CG2038	COP9 signalosome complex subunit 7 OS=Drosophila melanogaster GN=CSN7 PE=1 SV=2	18	0	26	0	0.478	0	18	0	29	0	0.45	0	11	3	19	8	0.309	0.104	0.00677557	CG2038
CG4088	GH28787p OS=Drosophila melanogaster GN=lat PE=1 SV=1	20	2	23	6	0.329	0.05	40	2	54	2	0.463	0.033	11	3	25	3	0.151	0.036	0.0651522	CG4088
CG5738	Longitudinals lacking protein-like OS=Drosophila melanogaster GN=lolal PE=1 SV=1	19	2	222	3	0.512	0.22	18	3	37	8	0.52	0.205	11	3	33	29	0.346	0.268	0.0159729	CG5738
CG2244	MTA1-like, isoform A OS=Drosophila melanogaster GN=MTA1-like PE=4 SV=2	11	0	14	0	0.302	0	24	3	29	3	0.298	0.03	11	2	20	2	0.157	0.031	0.0410265	CG2244
CG9680	Probable ATP-dependent RNA helicase Dbp73D OS=Drosophila melanogaster GN=Dbp73D PE=2 SV=3	22	0	27	0	0.41	0	35	4	60	10	0.303	0.042	11	2	18	3	0.172	0.033	0.0463952	CG9680
CG10315	LD05345p OS=Drosophila melanogaster GN=eIF2B-delta PE=1 SV=1	13	0	18	0	0.334	0	22	2	37	4	0.353	0.032	11	0	16	0	0.228	0	0.022357	CG10315
CG10938	Proteasome subunit alpha type-5 OS=Drosophila melanogaster GN=Prosalpha5 PE=1 SV=2	13	0	28	0	0.529	0	21	0	52	0	0.561	0	11	0	29	0	0.32	0	0.0195334	CG10938
CG11980	CG11980, isoform A OS=Drosophila melanogaster GN=CG11980 PE=2 SV=2	12	0	15	0	0.391	0	17	2	26	2	0.336	0.029	11	0	17	0	0.272	0	0.00644113	CG11980
CG1594	Tyrosine-protein kinase hopscotch OS=Drosophila melanogaster GN=hop PE=1 SV=2	2	0	6	0	0.035	0	31	2	48	2	0.297	0.019	11	0	26	0	0.113	0	0.121728	CG1594
CG17331	Proteasome subunit beta type OS=Drosophila melanogaster GN=CG17331 PE=1 SV=1	13	0	24	0	0.478	0	7	0	13	0	0.393	0	11	0	26	0	0.299	0	0.0139609	CG17331
CG2671	Lethal(2) giant larvae protein OS=Drosophila melanogaster GN=l(2)gl PE=1 SV=2	9	0	10	0	0.108	0	16	3	22	3	0.151	0.026	11	0	25	0	0.121	0	0.0096596	CG2671
CG2917	LD43280p OS=Drosophila melanogaster GN=Orc4 PE=2 SV=1	12	0	14	0	0.227	0	22	0	34	0	0.32	0	11	0	20	0	0.235	0	0.0253418	CG2917
CG31453	LD24646p OS=Drosophila melanogaster GN=pch2 PE=1 SV=1	12	0	25	0	0.295	0	21	0	38	0	0.292	0	11	0	36	0	0.242	0	0.021965	CG31453
CG32786	CG32786 OS=Drosophila melanogaster GN=CG32786 PE=2 SV=1	2	0	2	0	0.018	0	13	0	21	0	0.131	0	11	0	16	0	0.134	0	0.0622672	CG32786
CG40129	G protein-coupled receptor kinase 1 OS=Drosophila melanogaster GN=Gprk1 PE=1 SV=2	9	0	15	0	0.187	0	12	0	16	0	0.166	0	11	0	18	0	0.137	0	0.00338332	CG40129
CG4078	Regulator of telomere elongation helicase 1 homolog OS=Drosophila melanogaster GN=CG4078 PE=1 SV=1	16	0	18	0	0.164	0	14	0	23	0	0.168	0	11	0	18	0	0.12	0	0.00555735	CG4078
CG4215	DNA mismatch repair protein spellchecker 1 OS=Drosophila melanogaster GN=spel1 PE=3 SV=4	20	0	29	0	0.237	0	22	5	32	9	0.237	0.036	11	0	20	0	0.097	0	0.012679	CG4215
CG4976	Probable histone-lysine N-methyltransferase Mes-4 OS=Drosophila melanogaster GN=Mes-4 PE=1 SV=2	6	0	6	0	0.088	0	16	0	22	0	0.121	0	11	0	17	0	0.098	0	0.0312424	CG4976
CG5794	Ubiquitin carboxyl-terminal hydrolase OS=Drosophila melanogaster GN=CG5794 PE=2 SV=2	4	0	6	0	0.027	0	32	0	42	0	0.1	0	11	0	15	0	0.037	0	0.101809	CG5794
CG6677	Absent, small, or homeotic discs 2, isoform D OS=Drosophila melanogaster GN=ash2 PE=2 SV=3	17	0	31	0	0.371	0	23	0	32	0	0.33	0	11	0	27	0	0.173	0	0.0195516	CG6677
CG6876	CG6876 OS=Drosophila melanogaster GN=Prp31 PE=1 SV=1	20	0	32	0	0.449	0	21	0	32	0	0.293	0	11	0	23	0	0.164	0	0.0160225	CG6876
CG6975	Gigas OS=Drosophila melanogaster GN=gig PE=2 SV=1	5	0	5	0	0.032	0	27	0	42	0	0.175	0	11	0	21	0	0.048	0	0.080363	CG6975
CG7261	CG7261 OS=Drosophila melanogaster GN=CG7261 PE=2 SV=1	10	0	14	0	0.115	0	27	5	40	6	0.194	0.025	11	0	13	0	0.093	0	0.0555758	CG7261
CG7439	Protein argonaute-2 OS=Drosophila melanogaster GN=AGO2 PE=1 SV=3	29	0	36	0	0.226	0	18	0	23	0	0.181	0	11	0	24	0	0.087	0	0.0331075	CG7439
CG7483	eIF4AIII OS=Drosophila melanogaster GN=eIF4AIII PE=1 SV=1	6	0	13	0	0.148	0	16	3	22	6	0.388	0.058	11	0	26	0	0.246	0	0.0306787	CG7483
CG7935	D-Importin 7/RanBP7 OS=Drosophila melanogaster GN=msk PE=2 SV=1	21	0	32	0	0.28	0	23	3	30	3	0.194	0.019	11	0	40	0	0.119	0	0.0177257	CG7935
CG8439	GM12270p OS=Drosophila melanogaster GN=Cct5 PE=2 SV=1	30	0	54	0	0.613	0	32	0	54	0	0.437	0	11	0	20	0	0.153	0	0.0340004	CG8439
CG8548	FI03727p OS=Drosophila melanogaster GN=Kap-alpha1 PE=1 SV=1	10	0	12	0	0.366	0	13	3	22	7	0.247	0.044	11	0	18	0	0.192	0	0.000795388	CG8548
CG9209	GH13542p OS=Drosophila melanogaster GN=vap PE=2 SV=2	6	0	9	0	0.11	0	32	0	51	0	0.295	0	11	0	28	0	0.15	0	0.0883951	CG9209
CG4464	40S ribosomal protein S19a OS=Drosophila melanogaster GN=RpS19a PE=2 SV=3	11	3	14	7	0.378	0.192	25	8	47	17	0.692	0.288	10	8	36	42	0.385	0.237	0.0982478	CG4464
CG7726	60S ribosomal protein L11 OS=Drosophila melanogaster GN=RpL11 PE=1 SV=2	28	4	354	47	0.734	0.13	16	9	29	42	0.467	0.201	10	6	24	44	0.315	0.234	0.075267	CG7726
CG7014	40S ribosomal protein S5b OS=Drosophila melanogaster GN=RpS5b PE=2 SV=1	5	0	58	0	0.27	0	14	3	27	12	0.352	0.074	10	5	25	12	0.27	0.148	0.0483627	CG7014
CG12323	Proteasome subunit beta type OS=Drosophila melanogaster GN=Prosbeta5 PE=1 SV=1	10	0	13	0	0.234	0	15	3	20	4	0.294	0.131	10	4	31	14	0.167	0.16	0.00652099	CG12323
CG5519	BcDNA.LD02793 OS=Drosophila melanogaster GN=Prp19 PE=1 SV=1	14	0	21	0	0.285	0	9	5	11	13	0.297	0.071	10	3	26	12	0.152	0.038	0.00842963	CG5519
CG7757	CG7757, isoform A OS=Drosophila melanogaster GN=CG7757 PE=1 SV=1	16	0	24	0	0.298	0	25	0	31	0	0.426	0	10	3	17	6	0.144	0.048	0.0301616	CG7757
CG9075	Eukaryotic initiation factor 4A OS=Drosophila melanogaster GN=eIF-4a PE=2 SV=3	23	3	40	5	0.484	0.082	17	4	21	8	0.402	0.057	10	3	22	10	0.171	0.069	0.0349568	CG9075
CG16928	Endo/exonuclease Mre11 OS=Drosophila melanogaster GN=mre11 PE=1 SV=1	14	0	16	0	0.269	0	20	2	30	2	0.281	0.031	10	2	19	4	0.194	0.032	0.0192937	CG16928
CG1911	Condensin complex subunit 1 OS=Drosophila melanogaster GN=CAP-D2 PE=1 SV=1	13	0	18	0	0.167	0	32	2	47	2	0.229	0.007	10	2	14	5	0.07	0.014	0.0655292	CG1911
CG32164	CG32164 OS=Drosophila melanogaster GN=CG32164 PE=4 SV=2	25	0	42	0	0.277	0	38	0	57	0	0.291	0	10	2	16	2	0.108	0.017	0.0493461	CG32164
CG32165	CG32165 OS=Drosophila melanogaster GN=CG32165 PE=4 SV=2	23	0	39	0	0.22	0	38	0	57	0	0.291	0	10	2	16	2	0.108	0.017	0.051834	CG32165
CG3989	Multifunctional protein ADE2 OS=Drosophila melanogaster GN=ade5 PE=1 SV=2	5	0	6	0	0.152	0	27	3	38	4	0.357	0.049	10	2	21	9	0.135	0.049	0.101712	CG3989
CG10417	Probable protein phosphatase CG10417 OS=Drosophila melanogaster GN=CG10417 PE=1 SV=1	5	0	9	0	0.175	0	6	0	15	0	0.107	0	10	0	15	0	0.166	0	0.0222335	CG10417
CG11596	UPF0586 protein CG11596 OS=Drosophila melanogaster GN=CG11596 PE=1 SV=1	13	0	17	0	0.255	0	18	0	31	0	0.435	0	10	0	42	0	0.178	0	0.0139669	CG11596
CG11979	RE34924p OS=Drosophila melanogaster GN=Rpb5 PE=2 SV=1	9	0	18	0	0.443	0	9	0	12	0	0.438	0	10	0	23	0	0.362	0	0.000636537	CG11979
CG14476	BcDNA.GH04962 OS=Drosophila melanogaster GN=BcDNA.GH04962 PE=2 SV=1	12	0	15	0	0.172	0	39	0	55	0	0.28	0	10	0	15	0	0.128	0	0.0808525	CG14476
CG17603	Isoform C of Transcription initiation factor TFIID subunit 1 OS=Drosophila melanogaster GN=Taf1	16	0	18	0	0.095	0	15	4	18	8	0.071	0.011	10	0	17	0	0.052	0	0.00374533	CG17603
CG17704	Nipped-B protein OS=Drosophila melanogaster GN=Nipped-B PE=1 SV=3	9	0	12	0	0.091	0	19	4	31	4	0.102	0.02	10	0	19	0	0.064	0	0.0271165	CG17704
CG32783	CG32783 OS=Drosophila melanogaster GN=CG32783 PE=2 SV=1	2	0	2	0	0.018	0	10	0	16	0	0.097	0	10	0	15	0	0.117	0	0.0553514	CG32783
CG3902	CG3902 OS=Drosophila melanogaster GN=CG3902-RA PE=2 SV=1	12	0	16	0	0.435	0	13	0	30	0	0.287	0	10	0	16	0	0.249	0	0.00283288	CG3902
CG3957	HL01517p OS=Drosophila melanogaster GN=wmd PE=2 SV=1	6	0	7	0	0.259	0	14	0	16	0	0.375	0	10	0	17	0	0.271	0	0.0247068	CG3957
CG43736	CG33691, isoform B OS=Drosophila melanogaster GN=CG4564 PE=2 SV=2	17	0	27	0	0.313	0	14	0	18	0	0.24	0	10	0	18	0	0.151	0	0.0106548	CG43736
CG4800	Translationally-controlled tumor protein homolog OS=Drosophila melanogaster GN=Tctp PE=1 SV=1	7	0	8	0	0.517	0	5	2	6	4	0.308	0.134	10	0	23	0	0.401	0	0.0142811	CG4800
CG4904	Proteasome subunit alpha type-1 OS=Drosophila melanogaster GN=Pros35 PE=1 SV=1	15	2	31	5	0.52	0.093	16	0	23	0	0.52	0	10	0	23	0	0.258	0	0.00605213	CG4904
CG5370	Caspase-1 OS=Drosophila melanogaster GN=Dcp-1 PE=1 SV=1	6	0	10	0	0.269	0	18	2	34	2	0.545	0.022	10	0	19	0	0.22	0	0.0446864	CG5370
CG5684	GH06247p OS=Drosophila melanogaster GN=Pop2 PE=2 SV=2	4	0	5	0	0.185	0	11	0	21	0	0.441	0	10	0	16	0	0.323	0	0.0312134	CG5684
CG6322	CG6322 OS=Drosophila melanogaster GN=U4-U6-60K PE=1 SV=1	17	0	26	0	0.282	0	21	0	31	0	0.336	0	10	0	27	0	0.192	0	0.0190371	CG6322
CG6349	DNA polymerase alpha catalytic subunit OS=Drosophila melanogaster GN=DNApol-alpha180 PE=1 SV=2	25	0	27	0	0.208	0	27	0	34	0	0.163	0	10	0	14	0	0.077	0	0.0306262	CG6349
CG6535	Serine/threonine-protein kinase ATM OS=Drosophila melanogaster GN=tefu PE=2 SV=1	15	0	16	0	0.085	0	27	0	34	0	0.096	0	10	0	16	0	0.043	0	0.0376271	CG6535
CG6904	Putative glycogen [starch] synthase OS=Drosophila melanogaster GN=CG6904 PE=1 SV=2	12	0	18	0	0.228	0	22	2	44	4	0.257	0.014	10	0	23	0	0.171	0	0.0297414	CG6904
CG6998	Dynein light chain 1, cytoplasmic OS=Drosophila melanogaster GN=ctp PE=1 SV=1	14	2	23	2	0.517	0.337	8	0	11	0	0.64	0	10	0	33	0	0.371	0	0.00966285	CG6998
CG7034	Exocyst complex component 6 OS=Drosophila melanogaster GN=sec15 PE=1 SV=1	3	0	3	0	0.082	0	12	0	18	0	0.142	0	10	0	18	0	0.097	0	0.0462787	CG7034
CG7109	Serine/threonine-protein phosphatase PP2A OS=Drosophila melanogaster GN=mts PE=2 SV=1	9	0	12	0	0.269	0	13	0	18	0	0.362	0	10	0	19	0	0.33	0	0.00622928	CG7109
CG7154	CG7154 OS=Drosophila melanogaster GN=CG7154 PE=1 SV=1	9	0	11	0	0.154	0	23	3	34	8	0.271	0.035	10	0	16	0	0.137	0	0.0479198	CG7154
CG7704	Transcription initiation factor TFIID subunit 5 OS=Drosophila melanogaster GN=Taf5 PE=1 SV=1	8	0	11	0	0.169	0	24	0	33	0	0.32	0	10	0	14	0	0.141	0	0.0542998	CG7704
CG8151	General transcription factor IIH subunit 1 OS=Drosophila melanogaster GN=Tfb1 PE=1 SV=1	23	0	32	0	0.383	0	24	0	37	0	0.338	0	10	0	19	0	0.231	0	0.0259865	CG8151
CG9198	LD37115p OS=Drosophila melanogaster GN=shtd PE=2 SV=1	0	0	0	0	0	0	17	0	23	0	0.085	0	10	0	25	0	0.063	0	0.104817	CG9198
CG9282	60S ribosomal protein L24 OS=Drosophila melanogaster GN=RpL24 PE=1 SV=1	14	4	176	183	0.413	0.206	32	2	63	6	0.568	0.116	10	0	22	0	0.335	0	0.0644907	CG9282
CG9556	COP9 signalosome complex subunit 2 OS=Drosophila melanogaster GN=alien PE=1 SV=2	8	0	12	0	0.309	0	20	2	33	3	0.279	0.018	10	0	20	0	0.2	0	0.0397315	CG9556
CG9735	FI06027p OS=Drosophila melanogaster GN=Aats-trp PE=2 SV=1	22	0	39	0	0.395	0	32	2	43	2	0.486	0.04	10	0	22	0	0.209	0	0.0407482	CG9735
CG10423	Ribosomal protein S27 OS=Drosophila melanogaster GN=RpS27 PE=2 SV=1	11	0	48	0	0.405	0	16	3	27	6	0.417	0.25	9	2	44	10	0.25	0.226	0.0123424	CG10423
CG1519	Proteasome subunit alpha type-3 OS=Drosophila melanogaster GN=Prosalpha7 PE=1 SV=1	5	0	7	0	0.19	0	15	5	27	7	0.455	0.13	9	2	20	7	0.241	0.067	0.0554924	CG1519
CG1666	Helicase OS=Drosophila melanogaster GN=Hlc PE=2 SV=2	17	0	20	0	0.314	0	10	0	14	0	0.212	0	9	2	17	2	0.159	0.041	0.0192359	CG1666
CG4063	F-box-like/WD repeat-containing protein ebi OS=Drosophila melanogaster GN=ebi PE=1 SV=2	6	0	7	0	0.146	0	12	2	17	3	0.191	0.026	9	2	27	2	0.159	0.053	0.0171245	CG4063
CG6384	Centrosome-associated zinc finger protein CP190 OS=Drosophila melanogaster GN=Cp190 PE=1 SV=2	23	0	33	0	0.336	0	12	7	28	7	0.193	0.071	9	2	13	7	0.094	0.024	0.0467165	CG6384
CG7831	Protein claret segregational OS=Drosophila melanogaster GN=ncd PE=1 SV=1	20	0	47	0	0.367	0	13	4	22	8	0.181	0.046	9	2	14	5	0.123	0.027	0.0258382	CG7831
CG10042	MBD-R2, isoform B OS=Drosophila melanogaster GN=MBD-R2 PE=1 SV=2	16	0	20	0	0.251	0	8	0	12	0	0.103	0	9	0	14	0	0.085	0	0.0242803	CG10042
CG10289	CG10289 OS=Drosophila melanogaster GN=CG10289 PE=1 SV=2	14	0	20	0	0.234	0	21	0	25	0	0.235	0	9	0	16	0	0.101	0	0.0259765	CG10289
CG10379	Myoblast city OS=Drosophila melanogaster GN=mbc PE=1 SV=2	0	0	0	0	0	0	7	0	9	0	0.05	0	9	0	12	0	0.055	0	0.0949043	CG10379
CG10542	E3 ubiquitin-protein ligase Bre1 OS=Drosophila melanogaster GN=Bre1 PE=1 SV=2	15	0	15	0	0.179	0	7	0	9	0	0.08	0	9	0	16	0	0.087	0	0.0250402	CG10542
CG1109	CG1109, isoform A OS=Drosophila melanogaster GN=CG1109 PE=1 SV=2	14	0	17	0	0.201	0	18	5	32	5	0.182	0.032	9	0	23	0	0.124	0	0.0120374	CG1109
CG1120	CG1120 OS=Drosophila melanogaster GN=CG1120 PE=1 SV=1	9	0	10	0	0.19	0	22	0	40	0	0.328	0	9	0	17	0	0.13	0	0.0456891	CG1120
CG11228	Serine/threonine-protein kinase hippo OS=Drosophila melanogaster GN=hpo PE=1 SV=1	13	0	17	0	0.266	0	12	2	16	2	0.155	0.016	9	0	21	0	0.111	0	0.00192371	CG11228
CG11399	CG11399 OS=Drosophila melanogaster GN=CG11399 PE=2 SV=1	10	0	12	0	0.13	0	21	0	34	0	0.183	0	9	0	15	0	0.1	0	0.0370073	CG11399
CG12101	60 kDa heat shock protein, mitochondrial OS=Drosophila melanogaster GN=Hsp60 PE=1 SV=3	12	0	15	0	0.393	0	11	0	14	0	0.185	0	9	0	13	0	0.185	0	0.00338332	CG12101
CG12217	Serine/threonine-protein phosphatase 6 catalytic subunit OS=Drosophila melanogaster GN=PpV PE=2 SV=1	6	2	7	4	0.254	0.069	15	0	20	0	0.436	0	9	0	15	0	0.277	0	0.0320158	CG12217
CG12233	Probable isocitrate dehydrogenase [NAD] subunit alpha, mitochondrial OS=Drosophila melanogaster GN=l(1)G0156 PE=2 SV=1	14	0	25	0	0.329	0	15	3	34	3	0.488	0.05	9	0	22	0	0.265	0	0.00546416	CG12233
CG12238	Supporter of activation of yellow protein OS=Drosophila melanogaster GN=e(y)3 PE=2 SV=3	10	0	11	0	0.049	0	14	0	28	0	0.088	0	9	0	17	0	0.049	0	0.00937165	CG12238
CG1258	FI03252p OS=Drosophila melanogaster GN=pav PE=1 SV=1	29	0	40	0	0.328	0	11	0	15	0	0.109	0	9	0	22	0	0.107	0	0.0620109	CG1258
CG1569	Rough deal OS=Drosophila melanogaster GN=rod PE=2 SV=2	12	0	15	0	0.092	0	11	0	19	0	0.057	0	9	0	14	0	0.052	0	0.00338332	CG1569
CG16944	Isoform A of ADP,ATP carrier protein OS=Drosophila melanogaster GN=sesB	7	0	8	0	0.254	0	29	3	39	3	0.605	0.074	9	0	21	0	0.278	0	0.0910983	CG16944
CG17266	Peptidyl-prolyl cis-trans isomerase OS=Drosophila melanogaster GN=CG17266 PE=1 SV=1	7	0	13	0	0.65	0	16	0	28	0	0.601	0	9	0	28	0	0.383	0	0.0298183	CG17266
CG18001	60S ribosomal protein L38 OS=Drosophila melanogaster GN=RpL38 PE=2 SV=1	7	0	18	0	0.429	0	9	0	26	0	0.314	0	9	0	32	0	0.314	0	0.0031696	CG18001
CG1810	RE70632p OS=Drosophila melanogaster GN=mRNA-cap PE=2 SV=1	0	0	0	0	0	0	12	0	16	0	0.179	0	9	0	22	0	0.133	0	0.0958548	CG1810
CG1957	Probable cleavage and polyadenylation specificity factor subunit 2 OS=Drosophila melanogaster GN=Cpsf100 PE=1 SV=1	13	0	18	0	0.198	0	33	6	44	8	0.384	0.087	9	0	19	0	0.136	0	0.0756429	CG1957
CG30118	CG30118, isoform B OS=Drosophila melanogaster GN=CG30118 PE=4 SV=1	20	0	28	0	0.414	0	8	2	10	2	0.2	0.034	9	0	11	0	0.189	0	0.0447366	CG30118
CG5149	CG5149, isoform B OS=Drosophila melanogaster GN=CG5149 PE=4 SV=1	2	0	2	0	0.062	0	13	0	22	0	0.31	0	9	0	12	0	0.194	0	0.0652859	CG5149
CG5166	Ataxin-2 homolog OS=Drosophila melanogaster GN=Atx2 PE=1 SV=1	11	0	17	0	0.183	0	18	0	32	0	0.182	0	9	0	17	0	0.115	0	0.0217003	CG5166
CG6195	AT06125p OS=Drosophila melanogaster GN=CG6195 PE=1 SV=1	13	0	16	0	0.433	0	9	3	12	5	0.215	0.066	9	0	15	0	0.187	0	0.00311514	CG6195
CG6554	Arginine methyltransferase 1 OS=Drosophila melanogaster GN=Art1 PE=1 SV=1	0	0	0	0	0	0	6	0	8	0	0.13	0	9	0	16	0	0.207	0	0.0996796	CG6554
CG7546	CG7546, isoform A OS=Drosophila melanogaster GN=CG7546 PE=1 SV=2	13	0	15	0	0.18	0	30	2	59	2	0.215	0.017	9	0	37	0	0.099	0	0.0604507	CG7546
CG7843	Serrate RNA effector molecule homolog OS=Drosophila melanogaster GN=Ars2 PE=1 SV=2	8	0	8	0	0.103	0	7	5	10	7	0.097	0.055	9	0	14	0	0.089	0	0.025179	CG7843
CG8190	eIF2B-gamma OS=Drosophila melanogaster GN=eIF2B-gamma PE=1 SV=1	10	0	13	0	0.29	0	18	0	24	0	0.319	0	9	0	24	0	0.215	0	0.0247026	CG8190
CG8583	RE14391p OS=Drosophila melanogaster GN=sec63 PE=1 SV=1	7	0	8	0	0.084	0	13	2	22	2	0.15	0.035	9	0	14	0	0.166	0	0.0124102	CG8583
CG9580	Sperm-specific dynein intermediate chain 1 OS=Drosophila melanogaster GN=Sdic PE=1 SV=2	7	0	7	0	0.205	0	7	0	13	0	0.199	0	9	0	30	0	0.221	0	0.00373837	CG9580
CG9769	Eukaryotic translation initiation factor 3 subunit F-1 OS=Drosophila melanogaster GN=eIF3-S5-1 PE=2 SV=1	9	0	26	0	0.339	0	19	0	33	0	0.386	0	9	0	26	0	0.279	0	0.0329534	CG9769
CG1977	Spectrin alpha chain OS=Drosophila melanogaster GN=alpha-Spec PE=1 SV=2	16	0	22	0	0.11	0	9	11	11	14	0.037	0.039	8	11	19	24	0.037	0.041	0.230772	CG1977
CG2469	CG2469, isoform A OS=Drosophila melanogaster GN=CG2469 PE=1 SV=1	12	0	13	0	0.143	0	12	2	14	2	0.102	0.006	8	5	16	8	0.051	0.039	0.00681257	CG2469
CG4651	60S ribosomal protein L13 OS=Drosophila melanogaster GN=RpL13 PE=1 SV=1	13	10	16	175	0.413	0.234	16	4	26	5	0.404	0.128	8	5	14	18	0.349	0.128	0.059017	CG4651
CG4897	60S ribosomal protein L7 OS=Drosophila melanogaster GN=RpL7 PE=2 SV=2	18	10	71	37	0.536	0.329	17	3	24	3	0.397	0.083	8	5	14	38	0.206	0.107	0.0521365	CG4897
CG6510	60S ribosomal protein L18a OS=Drosophila melanogaster GN=RpL18A PE=1 SV=1	16	8	147	91	0.458	0.345	11	0	20	0	0.311	0	8	5	11	21	0.294	0.266	0.0451886	CG6510
CG15442	60S ribosomal protein L27a OS=Drosophila melanogaster GN=RpL27A PE=2 SV=2	10	6	74	21	0.369	0.235	8	0	14	0	0.309	0	8	4	19	25	0.195	0.107	0.0398378	CG15442
CG2099	RE17737p OS=Drosophila melanogaster GN=RpL35A PE=2 SV=1	12	5	151	7	0.401	0.261	11	0	18	0	0.357	0	8	4	15	9	0.255	0.146	0.0107782	CG2099
CG8922	40S ribosomal protein S5a OS=Drosophila melanogaster GN=RpS5a PE=1 SV=1	6	0	11	0	0.219	0	11	3	20	12	0.268	0.075	8	4	18	10	0.18	0.114	0.0175677	CG8922
CG1064	GH08712p OS=Drosophila melanogaster GN=Snr1 PE=1 SV=2	21	0	25	0	0.586	0	19	0	31	0	0.459	0	8	3	16	7	0.259	0.057	0.0290628	CG1064
CG2746	60S ribosomal protein L19 OS=Drosophila melanogaster GN=RpL19 PE=1 SV=2	14	4	120	320	0.33	0.128	14	2	17	3	0.286	0.034	8	3	19	13	0.256	0.143	0.0187094	CG2746
CG3163	CG3163 OS=Drosophila melanogaster GN=CG3163 PE=1 SV=2	6	0	7	0	0.147	0	10	4	14	9	0.361	0.057	8	3	14	7	0.212	0.09	0.0136727	CG3163
CG8725	COP9 signalosome complex subunit 4 OS=Drosophila melanogaster GN=CSN4 PE=1 SV=1	24	0	34	0	0.558	0	27	0	44	0	0.491	0	8	3	14	7	0.179	0.071	0.0415255	CG8725
CG4399	Enhanced adult sensory threshold OS=Drosophila melanogaster GN=east PE=2 SV=1	4	0	5	0	0.025	0	9	2	15	3	0.043	0.018	8	2	16	2	0.045	0.013	0.0243923	CG4399
CG4654	Isoform B of Transcription factor Dp OS=Drosophila melanogaster GN=Dp	8	0	11	0	0.252	0	7	0	10	0	0.172	0	8	2	13	4	0.181	0.061	0.00138568	CG4654
CG4869	Beta-Tubulin at 97EF, isoform B OS=Drosophila melanogaster GN=betaTub97EF PE=2 SV=1	12	4	398	21	0.284	0.092	26	0	107	0	0.287	0	8	2	121	27	0.116	0.037	0.0644977	CG4869
CG5162	CG5162 OS=Drosophila melanogaster GN=CG5162 PE=2 SV=1	7	0	13	0	0.277	0	27	3	48	4	0.543	0.051	8	2	11	3	0.209	0.049	0.0982966	CG5162
CG5859	CG5859 OS=Drosophila melanogaster GN=CG5859-RA PE=2 SV=1	11	0	14	0	0.164	0	19	2	29	3	0.17	0.012	8	2	11	8	0.068	0.02	0.0346302	CG5859
CG7839	CG7839 OS=Drosophila melanogaster GN=CG7839 PE=1 SV=3	12	0	13	0	0.103	0	28	4	37	9	0.175	0.032	8	2	9	5	0.09	0.018	0.0723564	CG7839
CG7878	CG7878 OS=Drosophila melanogaster GN=CG7878 PE=1 SV=1	8	0	10	0	0.185	0	16	2	27	3	0.248	0.013	8	2	11	2	0.097	0.026	0.0325674	CG7878
CG10060	Guanine nucleotide-binding protein G(i) subunit alpha 65A OS=Drosophila melanogaster GN=G-ialpha65A PE=1 SV=2	8	0	8	0	0.208	0	16	0	21	0	0.473	0	8	0	18	0	0.29	0	0.0285955	CG10060
CG10110	Isoform B of Cleavage and polyadenylation specificity factor subunit 1 OS=Drosophila melanogaster GN=Cpsf160	0	0	0	0	0	0	19	0	34	0	0.134	0	8	0	16	0	0.048	0	0.121924	CG10110
CG11271	40S ribosomal protein S12 OS=Drosophila melanogaster GN=RpS12 PE=2 SV=2	4	0	6	0	0.281	0	17	2	20	10	0.446	0.094	8	0	19	0	0.475	0	0.0701377	CG11271
CG11376	CG11376 OS=Drosophila melanogaster GN=CG11376 PE=1 SV=2	15	0	22	0	0.127	0	15	2	25	4	0.098	0.012	8	0	16	0	0.058	0	0.0140973	CG11376
CG11958	Calnexin 99A, isoform A OS=Drosophila melanogaster GN=Cnx99A PE=1 SV=2	0	0	0	0	0	0	10	3	18	3	0.175	0.038	8	0	10	0	0.15	0	0.119204	CG11958
CG12141	Lysyl-tRNA synthetase OS=Drosophila melanogaster GN=Aats-lys PE=2 SV=2	27	0	72	0	0.405	0	7	0	16	0	0.107	0	8	0	15	0	0.124	0	0.0821671	CG12141
CG12298	Kinesin-like protein subito OS=Drosophila melanogaster GN=sub PE=1 SV=1	7	0	9	0	0.161	0	11	2	17	2	0.186	0.032	8	0	11	0	0.131	0	0.00450671	CG12298
CG12359	GH15225p OS=Drosophila melanogaster GN=Ulp1 PE=2 SV=1	12	0	13	0	0.088	0	12	0	18	0	0.071	0	8	0	10	0	0.061	0	0.00763404	CG12359
CG12737	Calmodulin-binding protein related to a Rab3 GDP/GTP exchange protein, isoform A OS=Drosophila melanogaster GN=Crag PE=2 SV=3	5	0	5	0	0.041	0	19	2	30	2	0.132	0.008	8	0	15	0	0.05	0	0.0700364	CG12737
CG12749	Heterogeneous nuclear ribonucleoprotein 87F OS=Drosophila melanogaster GN=Hrb87F PE=1 SV=2	6	0	7	0	0.158	0	14	2	27	2	0.205	0.031	8	0	29	0	0.171	0	0.0300015	CG12749
CG13425	Bancal, isoform E OS=Drosophila melanogaster GN=bl PE=4 SV=1	10	0	12	0	0.235	0	9	0	11	0	0.195	0	8	0	14	0	0.183	0	0.002045	CG13425
CG14224	LD38919p OS=Drosophila melanogaster GN=Ubqn PE=1 SV=1	13	0	14	0	0.32	0	19	0	22	0	0.353	0	8	0	27	0	0.165	0	0.0262206	CG14224
CG14884	COP9 signalosome complex subunit 5 OS=Drosophila melanogaster GN=CSN5 PE=1 SV=1	18	0	27	0	0.572	0	15	0	26	0	0.453	0	8	0	14	0	0.266	0	0.0219614	CG14884
CG16940	CG16940, isoform A OS=Drosophila melanogaster GN=CG16940 PE=2 SV=2	10	0	11	0	0.084	0	25	3	42	7	0.206	0.018	8	0	16	0	0.093	0	0.0631949	CG16940
CG18273	CG18273 OS=Drosophila melanogaster GN=CG18273 PE=2 SV=3	17	0	24	0	0.174	0	27	0	44	0	0.2	0	8	0	12	0	0.052	0	0.0436489	CG18273
CG1856	Protein tramtrack, beta isoform OS=Drosophila melanogaster GN=ttk PE=1 SV=2	22	0	42	0	0.384	0	23	0	30	0	0.306	0	8	0	15	0	0.16	0	0.0337945	CG1856
CG2252	Homeotic protein female sterile OS=Drosophila melanogaster GN=fs(1)h PE=1 SV=2	8	0	15	0	0.056	0	5	0	7	0	0.028	0	8	0	14	0	0.067	0	0.00990197	CG2252
CG2358	GM04682p OS=Drosophila melanogaster GN=twr PE=2 SV=1	5	0	5	0	0.324	0	6	0	9	0	0.335	0	8	0	20	0	0.389	0	0.00942211	CG2358
CG2925	Splicing factor 3A subunit 3 OS=Drosophila melanogaster GN=noi PE=1 SV=1	12	0	17	0	0.27	0	17	4	36	5	0.245	0.052	8	0	14	0	0.141	0	0.0166119	CG2925
CG3025	Males-absent on the first protein OS=Drosophila melanogaster GN=mof PE=1 SV=1	4	0	4	0	0.059	0	13	2	21	2	0.184	0.016	8	0	16	0	0.122	0	0.0452088	CG3025
CG3041	Origin recognition complex subunit 2 OS=Drosophila melanogaster GN=Orc2 PE=1 SV=2	8	0	9	0	0.149	0	16	3	23	12	0.264	0.036	8	0	17	0	0.139	0	0.0271397	CG3041
CG32210	E3 ubiquitin-protein ligase listerin OS=Drosophila melanogaster GN=l(3)76BDr PE=1 SV=2	6	0	8	0	0.042	0	13	0	18	0	0.08	0	8	0	16	0	0.046	0	0.0247775	CG32210
CG34408	CG34408, isoform A OS=Drosophila melanogaster GN=CG34408-RA PE=2 SV=3	5	0	5	0	0.042	0	20	0	27	0	0.159	0	8	0	18	0	0.055	0	0.0692068	CG34408
CG3688	mRNA cap guanine-N7 methyltransferase OS=Drosophila melanogaster GN=l(2)35Bd PE=1 SV=2	11	0	14	0	0.295	0	15	4	23	4	0.351	0.077	8	0	14	0	0.23	0	0.00980645	CG3688
CG3697	DNA repair endonuclease XPF OS=Drosophila melanogaster GN=mei-9 PE=1 SV=2	8	0	11	0	0.097	0	23	2	36	5	0.219	0.012	8	0	11	0	0.08	0	0.0650414	CG3697
CG4035	Eukaryotic translation initiation factor 4E OS=Drosophila melanogaster GN=eIF-4E PE=1 SV=1	12	0	17	0	0.537	0	10	0	27	0	0.293	0	8	0	19	0	0.166	0	0.00653623	CG4035
CG4097	Proteasome subunit beta type-1 OS=Drosophila melanogaster GN=Pros26 PE=1 SV=2	23	3	35	4	0.621	0.123	26	0	46	0	0.66	0	8	0	16	0	0.196	0	0.0397315	CG4097
CG42232	CG42232 OS=Drosophila melanogaster GN=CG42232 PE=4 SV=1	21	0	25	0	0.101	0	8	2	10	3	0.027	0.008	8	0	19	0	0.034	0	0.0557345	CG42232
CG44436	Protein strawberry notch OS=Drosophila melanogaster GN=sno PE=1 SV=1	19	0	22	0	0.134	0	9	5	13	5	0.049	0.033	8	0	14	0	0.051	0	0.0402518	CG44436
CG4616	CG4616, isoform A OS=Drosophila melanogaster GN=FLASH PE=1 SV=1	23	0	32	0	0.359	0	7	0	8	0	0.06	0	8	0	14	0	0.123	0	0.0670622	CG4616
CG5033	Ribosome biogenesis protein BOP1 homolog OS=Drosophila melanogaster GN=CG5033 PE=1 SV=1	14	0	18	0	0.111	0	17	4	22	4	0.19	0.036	8	0	11	0	0.128	0	0.015003	CG5033
CG5252	LP08082p OS=Drosophila melanogaster GN=Ranbp9 PE=1 SV=1	19	0	24	0	0.276	0	13	0	23	0	0.169	0	8	0	21	0	0.091	0	0.0262206	CG5252
CG5336	Ced-12 OS=Drosophila melanogaster GN=Ced-12 PE=2 SV=1	11	0	16	0	0.193	0	16	0	25	0	0.191	0	8	0	12	0	0.12	0	0.0188748	CG5336
CG5521	Isoform 2 of Probable Rho GTPase-activating protein CG5521 OS=Drosophila melanogaster GN=CG5521	0	0	0	0	0	0	21	0	36	0	0.119	0	8	0	12	0	0.052	0	0.12747	CG5521
CG5670	Sodium/potassium-transporting ATPase subunit alpha OS=Drosophila melanogaster GN=Atpalpha PE=1 SV=3	4	0	4	0	0.032	0	5	0	5	0	0.058	0	8	0	18	0	0.046	0	0.0210793	CG5670
CG6189	Lethal (1) 1Bi OS=Drosophila melanogaster GN=l(1)1Bi PE=2 SV=1	23	0	28	0	0.224	0	22	0	27	0	0.137	0	8	0	19	0	0.048	0	0.0337945	CG6189
CG6439	CG6439, isoform A OS=Drosophila melanogaster GN=CG6439 PE=1 SV=1	9	0	10	0	0.33	0	9	3	20	3	0.316	0.068	8	0	15	0	0.214	0	0.00519722	CG6439
CG7833	Origin recognition complex subunit 5 OS=Drosophila melanogaster GN=Orc5 PE=2 SV=1	14	0	17	0	0.396	0	26	4	38	5	0.346	0.072	8	0	17	0	0.211	0	0.0507036	CG7833
CG8233	Reduction in Cnn dots 1, isoform C OS=Drosophila melanogaster GN=Rcd1 PE=4 SV=1	5	0	6	0	0.074	0	23	4	38	5	0.277	0.032	8	0	17	0	0.156	0	0.095149	CG8233
CG8384	Protein groucho OS=Drosophila melanogaster GN=gro PE=1 SV=3	18	0	40	0	0.299	0	16	0	28	0	0.238	0	8	0	30	0	0.153	0	0.0222335	CG8384
CG8443	Protein KIAA0664 homolog OS=Drosophila melanogaster GN=CG8443 PE=1 SV=1	12	0	17	0	0.128	0	7	0	10	0	0.066	0	8	0	15	0	0.069	0	0.0138094	CG8443
CG8843	Exocyst complex component 2 OS=Drosophila melanogaster GN=sec5 PE=1 SV=1	4	0	5	0	0.077	0	21	2	35	2	0.226	0.015	8	0	15	0	0.087	0	0.0898756	CG8843
CG9086	E3 ubiquitin-protein ligase UBR1 OS=Drosophila melanogaster GN=UBR1 PE=2 SV=2	5	0	6	0	0.058	0	16	0	21	0	0.09	0	8	0	19	0	0.05	0	0.0492893	CG9086
CG9300	CG9300 OS=Drosophila melanogaster GN=CG9300 PE=2 SV=1	10	0	12	0	0.235	0	14	4	18	5	0.146	0.03	8	0	19	0	0.132	0	0.00782889	CG9300
CG9842	Serine/threonine-protein phosphatase 2B catalytic subunit 2 OS=Drosophila melanogaster GN=Pp2B-14D PE=1 SV=2	6	0	6	0	0.098	0	23	2	39	3	0.3	0.035	8	0	17	0	0.139	0	0.079878	CG9842
CG9936	Mediator of RNA polymerase II transcription subunit 13 OS=Drosophila melanogaster GN=skd PE=1 SV=1	8	0	8	0	0.036	0	26	0	39	0	0.147	0	8	0	23	0	0.04	0	0.0724069	CG9936
CG2986	40S ribosomal protein S21 OS=Drosophila melanogaster GN=oho23B PE=1 SV=1	4	0	6	0	0.458	0	4	8	5	14	0.241	0.277	7	8	15	50	0.614	0.627	0.457707	CG2986
CG7756	Heat shock 70 kDa protein cognate 2 OS=Drosophila melanogaster GN=Hsc70-2 PE=1 SV=2	5	3	8	6	0.033	0.039	3	0	26	0	0.051	0	7	5	21	31	0.058	0.041	0.140143	CG7756
CG11183	Decapping protein 1, isoform A OS=Drosophila melanogaster GN=Dcp1 PE=1 SV=1	15	2	22	5	0.481	0.075	10	5	14	5	0.317	0.118	7	4	16	11	0.247	0.124	0.0404904	CG11183
CG1091	CG1091, isoform B OS=Drosophila melanogaster GN=CG1091 PE=1 SV=1	17	6	19	12	0.327	0.111	20	0	27	0	0.359	0	7	3	10	5	0.145	0.048	0.0400392	CG1091
CG3335	CG3335 OS=Drosophila melanogaster GN=CG3335 PE=2 SV=1	2	0	2	0	0.027	0	21	2	33	2	0.239	0.011	7	3	16	4	0.108	0.047	0.139569	CG3335
CG6253	60S ribosomal protein L14 OS=Drosophila melanogaster GN=RpL14 PE=2 SV=1	14	8	224	357	0.464	0.319	16	0	36	0	0.572	0	7	3	19	22	0.259	0.108	0.0373869	CG6253
CG7041	FI06908p OS=Drosophila melanogaster GN=HP1b PE=1 SV=1	10	0	22	0	0.346	0	17	0	28	0	0.442	0	7	3	15	11	0.3	0.117	0.0304727	CG7041
CG1216	AT10158p OS=Drosophila melanogaster GN=mri PE=1 SV=1	5	0	9	0	0.118	0	8	0	18	0	0.178	0	7	2	16	3	0.185	0.036	0.00342662	CG1216
CG17820	Female-specific independent of transformer OS=Drosophila melanogaster GN=fit PE=1 SV=1	6	0	15	0	0.207	0	12	2	13	3	0.529	0.083	7	2	18	11	0.198	0.083	0.0252648	CG17820
CG3203	60S ribosomal protein L17 OS=Drosophila melanogaster GN=RpL17 PE=1 SV=1	18	2	76	15	0.489	0.134	15	0	31	0	0.366	0	7	2	21	3	0.296	0.134	0.0310449	CG3203
CG5971	Cdc6 OS=Drosophila melanogaster GN=Cdc6 PE=1 SV=1	24	0	41	0	0.406	0	25	3	41	6	0.301	0.042	7	2	8	5	0.104	0.033	0.0486878	CG5971
CG10539	P70s6k protein kinase homolog OS=Drosophila melanogaster GN=S6k PE=2 SV=2	4	0	6	0	0.127	0	13	0	20	0	0.182	0	7	0	29	0	0.141	0	0.0470892	CG10539
CG10602	CG10602, isoform B OS=Drosophila melanogaster GN=CG10602 PE=2 SV=1	24	0	44	0	0.511	0	19	0	28	0	0.364	0	7	0	16	0	0.199	0	0.0403355	CG10602
CG11006	CG11006, isoform A OS=Drosophila melanogaster GN=Sap130 PE=2 SV=1	8	0	10	0	0.105	0	11	0	13	0	0.134	0	7	0	14	0	0.088	0	0.00934662	CG11006
CG11396	CG11396 OS=Drosophila melanogaster GN=CG11396 PE=2 SV=2	9	0	9	0	0.229	0	12	0	19	0	0.308	0	7	0	14	0	0.118	0	0.0116939	CG11396
CG11624	Polyubiquitin OS=Drosophila melanogaster GN=Ubi-p63E PE=3 SV=1	3	0	12	0	0.05	0	5	3	7	6	0.045	0.033	7	0	35	0	0.062	0	0.030051	CG11624
CG11844	Vig2, isoform B OS=Drosophila melanogaster GN=vig2 PE=1 SV=2	20	3	66	6	0.449	0.077	10	2	18	3	0.196	0.041	7	0	13	0	0.16	0	0.0533767	CG11844
CG12230	Vacuolar protein sorting-associated protein 33A OS=Drosophila melanogaster GN=car PE=1 SV=1	10	0	11	0	0.183	0	19	0	24	0	0.219	0	7	0	19	0	0.118	0	0.039821	CG12230
CG12559	Isoform C of Mitogen-activated protein kinase ERK-A OS=Drosophila melanogaster GN=rl	7	0	7	0	0.223	0	10	0	15	0	0.316	0	7	0	16	0	0.154	0	0.00763404	CG12559
CG14215	Protein ELYS homolog OS=Drosophila melanogaster GN=CG14215 PE=1 SV=2	12	0	14	0	0.094	0	12	4	14	4	0.08	0.018	7	0	11	0	0.036	0	0.00746038	CG14215
CG14804	Vacuolar protein sorting-associated protein 26 OS=Drosophila melanogaster GN=Vps26 PE=2 SV=1	4	0	5	0	0.107	0	12	0	17	0	0.232	0	7	0	15	0	0.174	0	0.0407342	CG14804
CG1559	Regulator of nonsense transcripts 1 homolog OS=Drosophila melanogaster GN=Upf1 PE=1 SV=2	18	0	21	0	0.196	0	22	0	30	0	0.178	0	7	0	11	0	0.066	0	0.0365351	CG1559
CG15693	40S ribosomal protein S20 OS=Drosophila melanogaster GN=RpS20 PE=1 SV=1	4	0	9	0	0.1	0	10	2	27	51	0.375	0.275	7	0	20	0	0.158	0	0.0263881	CG15693
CG1578	CG1578 OS=Drosophila melanogaster GN=CG1578 PE=1 SV=1	15	0	20	0	0.245	0	19	0	26	0	0.191	0	7	0	12	0	0.081	0	0.0303153	CG1578
CG15793	Dual specificity mitogen-activated protein kinase kinase dSOR1 OS=Drosophila melanogaster GN=Dsor1 PE=2 SV=2	7	0	8	0	0.268	0	14	0	23	0	0.336	0	7	0	14	0	0.189	0	0.0285955	CG15793
CG15845	Transcription factor Adf-1 OS=Drosophila melanogaster GN=Adf1 PE=1 SV=2	9	0	33	0	0.233	0	11	3	14	4	0.202	0.076	7	0	9	0	0.221	0	0.00335769	CG15845
CG17766	CG17766 OS=Drosophila melanogaster GN=Rbcn-3B PE=2 SV=1	4	0	6	0	0.042	0	24	0	33	0	0.193	0	7	0	15	0	0.044	0	0.100931	CG17766
CG18009	TATA box binding protein-related factor 2, isoform E OS=Drosophila melanogaster GN=Trf2 PE=2 SV=1	8	0	16	0	0.041	0	9	0	15	0	0.041	0	7	0	8	0	0.041	0	0.002584	CG18009
CG18319	Ubiquitin-conjugating enzyme E2 N OS=Drosophila melanogaster GN=ben PE=2 SV=1	10	0	16	0	0.523	0	15	0	28	0	0.576	0	7	0	16	0	0.444	0	0.0223349	CG18319
CG2034	Anon-i1 protein OS=Drosophila melanogaster GN=anon-i1 PE=1 SV=1	9	0	10	0	0.24	0	8	2	10	3	0.191	0.042	7	0	27	0	0.187	0	0.000623345	CG2034
CG2199	Isoform A of Zinc finger protein CG2199 OS=Drosophila melanogaster GN=CG2199	23	0	25	0	0.327	0	15	3	20	10	0.169	0.035	7	0	12	0	0.098	0	0.043829	CG2199
CG2604	AT14148p OS=Drosophila melanogaster GN=CG2604 PE=2 SV=1	2	0	2	0	0.112	0	5	0	5	0	0.081	0	7	0	10	0	0.216	0	0.0423957	CG2604
CG2960	Ubiquitin-60S ribosomal protein L40 OS=Drosophila melanogaster GN=RpL40 PE=1 SV=2	3	0	8	0	0.297	0	6	4	6	14	0.359	0.273	7	0	28	0	0.367	0	0.0452484	CG2960
CG2990	CG2990, isoform B OS=Drosophila melanogaster GN=CG2990-RB PE=2 SV=1	5	0	5	0	0.075	0	7	0	9	0	0.067	0	7	0	14	0	0.068	0	0.00544975	CG2990
CG3004	Protein LST8 homolog OS=Drosophila melanogaster GN=CG3004 PE=2 SV=2	15	0	15	0	0.588	0	15	0	21	0	0.415	0	7	0	10	0	0.115	0	0.0218537	CG3004
CG32067	Simjang, isoform A OS=Drosophila melanogaster GN=simj PE=1 SV=1	7	0	8	0	0.087	0	14	2	18	2	0.2	0.024	7	0	16	0	0.071	0	0.0280306	CG32067
CG32438	Smc5, isoform E OS=Drosophila melanogaster GN=Smc5 PE=4 SV=3	9	0	11	0	0.134	0	13	0	14	0	0.145	0	7	0	20	0	0.084	0	0.0158591	CG32438
CG32744	GH17761p OS=Drosophila melanogaster GN=Ubi-p5E PE=1 SV=3	3	0	10	0	0.071	0	5	3	6	6	0.064	0.047	7	0	30	0	0.088	0	0.030051	CG32744
CG3756	CG3756 OS=Drosophila melanogaster GN=CG3756 PE=1 SV=1	16	0	22	0	0.447	0	17	5	24	8	0.396	0.057	7	0	14	0	0.141	0	0.0235074	CG3756
CG4065	N-alpha-acetyltransferase, 35 NatC auxiliary subunit homolog OS=Drosophila melanogaster GN=CG4065 PE=1 SV=1	10	0	12	0	0.172	0	25	0	36	0	0.276	0	7	0	14	0	0.087	0	0.064199	CG4065
CG42236	Isoform C of Ran-binding proteins 9/10 homolog OS=Drosophila melanogaster GN=RanBPM	4	0	4	0	0.13	0	5	0	5	0	0.109	0	7	0	19	0	0.105	0	0.0131355	CG42236
CG42574	CG42574 OS=Drosophila melanogaster GN=CG42574 PE=1 SV=4	11	0	11	0	0.065	0	18	2	25	2	0.076	0.009	7	0	10	0	0.029	0	0.0331668	CG42574
CG4261	Helicase 89B OS=Drosophila melanogaster GN=Hel89B PE=4 SV=3	8	0	13	0	0.056	0	37	0	66	0	0.215	0	7	0	10	0	0.047	0	0.110068	CG4261
CG4798	Uridine kinase OS=Drosophila melanogaster GN=l(2)k01209 PE=1 SV=1	2	0	3	0	0.048	0	11	2	25	2	0.244	0.037	7	0	14	0	0.123	0	0.0702063	CG4798
CG4975	CG4975, isoform A OS=Drosophila melanogaster GN=CG4975 PE=4 SV=1	2	0	2	0	0.114	0	8	0	11	0	0.344	0	7	0	12	0	0.179	0	0.0463036	CG4975
CG5083	RE32990p OS=Drosophila melanogaster GN=Rbf2 PE=1 SV=1	4	0	4	0	0.032	0	17	0	25	0	0.212	0	7	0	13	0	0.097	0	0.0703985	CG5083
CG5341	Exocyst complex component 3 OS=Drosophila melanogaster GN=sec6 PE=1 SV=2	4	0	7	0	0.061	0	12	0	14	0	0.156	0	7	0	16	0	0.084	0	0.0407342	CG5341
CG5482	CG5482 OS=Drosophila melanogaster GN=CG5482 PE=1 SV=1	14	0	20	0	0.403	0	7	0	10	0	0.113	0	7	0	12	0	0.191	0	0.0285955	CG5482
CG5728	CG5728 OS=Drosophila melanogaster GN=CG5728 PE=1 SV=2	8	0	8	0	0.084	0	14	2	20	3	0.121	0.018	7	0	15	0	0.065	0	0.0221659	CG5728
CG6147	LD23779p OS=Drosophila melanogaster GN=Tsc1 PE=2 SV=1	8	0	12	0	0.089	0	11	2	18	2	0.102	0.012	7	0	8	0	0.075	0	0.00450671	CG6147
CG6692	Cathepsin L OS=Drosophila melanogaster GN=Cp1 PE=1 SV=2	11	0	19	0	0.31	0	5	2	5	2	0.1	0.032	7	0	15	0	0.229	0	0.0221414	CG6692
CG7162	Mediator of RNA polymerase II transcription subunit 1 OS=Drosophila melanogaster GN=MED1 PE=1 SV=2	0	0	0	0	0	0	13	2	17	2	0.104	0.018	7	0	12	0	0.075	0	0.124591	CG7162
CG7456	Conserved oligomeric Golgi complex subunit 4 OS=Drosophila melanogaster GN=CG7456 PE=1 SV=1	5	0	6	0	0.14	0	5	0	6	0	0.104	0	7	0	10	0	0.104	0	0.00677997	CG7456
CG7945	CG7945, isoform A OS=Drosophila melanogaster GN=CG7945 PE=2 SV=1	15	0	25	0	0.469	0	5	0	9	0	0.191	0	7	0	22	0	0.271	0	0.0492481	CG7945
CG8203	Cyclin-dependent kinase 5 homolog OS=Drosophila melanogaster GN=Cdk5 PE=1 SV=2	7	0	8	0	0.259	0	10	0	10	0	0.456	0	7	0	10	0	0.197	0	0.00763404	CG8203
CG8793	Lethal (3) 76BDm OS=Drosophila melanogaster GN=l(3)76BDm PE=1 SV=2	4	0	5	0	0.067	0	38	2	54	3	0.249	0.011	7	0	13	0	0.062	0	0.142971	CG8793
CG9539	DSec61alpha OS=Drosophila melanogaster GN=Sec61alpha PE=2 SV=1	7	0	12	0	0.111	0	10	0	16	0	0.2	0	7	0	15	0	0.128	0	0.00763404	CG9539
CG9738	MAP kinase kinase 4, isoform A OS=Drosophila melanogaster GN=Mkk4 PE=1 SV=1	14	0	25	0	0.46	0	18	0	45	0	0.351	0	7	0	17	0	0.167	0	0.0280262	CG9738
CG9953	CG9953 OS=Drosophila melanogaster GN=CG9953 PE=2 SV=1	15	0	23	0	0.406	0	17	0	30	0	0.285	0	7	0	28	0	0.098	0	0.025518	CG9953
CG12740	Ribosomal protein L28, isoform C OS=Drosophila melanogaster GN=RpL28 PE=2 SV=1	10	7	26	12	0.315	0.345	13	8	21	57	0.394	0.255	6	8	15	53	0.243	0.257	0.214257	CG12740
CG6226	39 kDa FK506-binding nuclear protein OS=Drosophila melanogaster GN=FK506-bp1 PE=1 SV=2	15	2	33	6	0.235	0.076	10	3	11	4	0.28	0.064	6	6	11	23	0.134	0.104	0.0541756	CG6226
CG6474	Transcription initiation factor TFIID subunit 9 OS=Drosophila melanogaster GN=e(y)1 PE=1 SV=1	10	0	13	0	0.291	0	11	8	26	16	0.277	0.162	6	6	7	32	0.187	0.194	0.107599	CG6474
CG11522	RE08669p OS=Drosophila melanogaster GN=RpL6 PE=2 SV=1	26	7	116	15	0.385	0.115	16	10	31	23	0.302	0.134	6	5	12	23	0.145	0.103	0.134682	CG11522
CG32435	CLIP-associating protein OS=Drosophila melanogaster GN=chb PE=1 SV=1	12	0	18	0	0.123	0	26	2	41	2	0.174	0.01	6	4	7	9	0.045	0.025	0.0808589	CG32435
CG1821	60S ribosomal protein L31 OS=Drosophila melanogaster GN=RpL31 PE=1 SV=1	9	2	29	3	0.484	0.177	11	4	19	4	0.452	0.137	6	3	13	11	0.484	0.137	0.0225642	CG1821
CG3314	60S ribosomal protein L7a OS=Drosophila melanogaster GN=RpL7A PE=2 SV=2	13	3	30	32	0.258	0.114	13	3	23	5	0.354	0.085	6	3	12	22	0.177	0.085	0.0407342	CG3314
CG7137	Ribosomal RNA-processing protein 8 OS=Drosophila melanogaster GN=CG7137 PE=1 SV=1	17	2	19	2	0.321	0.081	14	3	20	5	0.383	0.095	6	3	8	14	0.168	0.095	0.0485481	CG7137
CG11999	CG11999 OS=Drosophila melanogaster GN=CG11999 PE=1 SV=1	0	0	0	0	0	0	6	2	7	3	0.218	0.06	6	2	8	10	0.333	0.111	0.156636	CG11999
CG14478	CG14478, isoform A OS=Drosophila melanogaster GN=BEST:LD13441 PE=1 SV=1	7	0	8	0	0.176	0	18	2	27	3	0.295	0.025	6	2	19	2	0.164	0.053	0.0701377	CG14478
CG1749	Ubiquitin-like modifier-activating enzyme 5 OS=Drosophila melanogaster GN=CG1749 PE=1 SV=1	9	0	15	0	0.384	0	9	3	13	4	0.243	0.054	6	2	15	3	0.139	0.057	0.00465949	CG1749
CG18729	Protein zwilch OS=Drosophila melanogaster GN=zwilch PE=1 SV=1	20	0	29	0	0.354	0	20	2	26	2	0.295	0.016	6	2	8	8	0.095	0.028	0.0463036	CG18729
CG6311	Enhancer of mRNA-decapping protein 3 OS=Drosophila melanogaster GN=Edc3 PE=1 SV=1	8	0	12	0	0.215	0	16	3	26	3	0.287	0.051	6	2	9	4	0.074	0.037	0.0512656	CG6311
CG6715	KP78a OS=Drosophila melanogaster GN=KP78a PE=2 SV=1	11	0	11	0	0.196	0	16	0	25	0	0.247	0	6	2	11	2	0.111	0.031	0.0316408	CG6715
CG8186	V-type proton ATPase subunit D 1 OS=Drosophila melanogaster GN=Vha36-1 PE=1 SV=1	10	0	13	0	0.386	0	18	2	31	2	0.496	0.041	6	2	10	3	0.272	0.085	0.0501983	CG8186
CG10161	Eukaryotic translation initiation factor 3 subunit D-1 OS=Drosophila melanogaster GN=eIF-3p66 PE=1 SV=1	7	0	10	0	0.191	0	29	0	51	0	0.355	0	6	0	21	0	0.098	0	0.101569	CG10161
CG10237	CG10237, isoform B OS=Drosophila melanogaster GN=CG10237 PE=2 SV=2	6	3	8	4	0.185	0.105	16	2	24	5	0.426	0.043	6	0	16	0	0.198	0	0.0702588	CG10237
CG10286	CG10286 OS=Drosophila melanogaster GN=CG10286 PE=2 SV=1	0	0	0	0	0	0	2	0	2	0	0.022	0	6	0	19	0	0.051	0	0.134852	CG10286
CG10498	Cell division control protein 2 cognate OS=Drosophila melanogaster GN=cdc2c PE=1 SV=1	9	0	9	0	0.261	0	10	0	11	0	0.296	0	6	0	19	0	0.213	0	0.0100864	CG10498
CG10646	CG10646 OS=Drosophila melanogaster GN=CG10646 PE=2 SV=1	4	0	4	0	0.123	0	7	0	13	0	0.282	0	6	0	13	0	0.191	0	0.0116878	CG10646
CG10673	CG10673 OS=Drosophila melanogaster GN=CG10673 PE=1 SV=1	7	0	9	0	0.286	0	6	0	10	0	0.277	0	6	0	15	0	0.25	0	0.00137931	CG10673
CG10685	Probable DNA-directed RNA polymerases I and III subunit RPAC2 OS=Drosophila melanogaster GN=l(2)37Cg PE=1 SV=1	11	0	19	0	0.667	0	9	0	17	0	0.657	0	6	0	24	0	0.486	0	0.0134872	CG10685
CG10895	Isoform Short of Ovarian-specific serine/threonine-protein kinase Lok OS=Drosophila melanogaster GN=lok	10	0	11	0	0.283	0	21	2	23	2	0.378	0.034	6	0	11	0	0.142	0	0.0592119	CG10895
CG10955	RNA polymerase-associated protein Rtf1 OS=Drosophila melanogaster GN=Rtf1 PE=1 SV=1	4	0	6	0	0.101	0	15	2	21	2	0.159	0.026	6	0	12	0	0.12	0	0.0735092	CG10955
CG11076	CG11076, isoform A OS=Drosophila melanogaster GN=CG11076-RA PE=1 SV=3	6	0	8	0	0.244	0	10	2	15	3	0.305	0.075	6	0	9	0	0.305	0	0.0108622	CG11076
CG11875	CG11875 OS=Drosophila melanogaster GN=CG11875 PE=2 SV=1	7	0	8	0	0.3	0	24	0	42	0	0.484	0	6	0	10	0	0.112	0	0.084558	CG11875
CG11876	CG11876, isoform A OS=Drosophila melanogaster GN=CG11876 PE=1 SV=1	10	0	15	0	0.279	0	12	3	17	4	0.271	0.063	6	0	9	0	0.203	0	0.0117562	CG11876
CG11989	Arrest defective 1, isoform A OS=Drosophila melanogaster GN=Ard1 PE=1 SV=1	0	0	0	0	0	0	6	0	8	0	0.286	0	6	0	11	0	0.27	0	0.0917517	CG11989
CG13630	Methionine aminopeptidase OS=Drosophila melanogaster GN=CG13630 PE=2 SV=1	5	0	7	0	0.107	0	12	2	14	3	0.259	0.035	6	0	12	0	0.112	0	0.0372295	CG13630
CG1401	Cullin-5 OS=Drosophila melanogaster GN=Cul-5 PE=1 SV=1	7	0	8	0	0.099	0	21	3	32	5	0.216	0.035	6	0	9	0	0.112	0	0.0808481	CG1401
CG1416	CG1416, isoform A OS=Drosophila melanogaster GN=CG1416 PE=2 SV=2	15	0	19	0	0.497	0	12	0	39	0	0.314	0	6	0	16	0	0.158	0	0.0266354	CG1416
CG1422	SD01505p OS=Drosophila melanogaster GN=p115 PE=1 SV=2	7	0	8	0	0.141	0	22	0	29	0	0.306	0	6	0	12	0	0.081	0	0.0764338	CG1422
CG15439	CG15439 OS=Drosophila melanogaster GN=CG15439 PE=2 SV=1	2	0	2	0	0.042	0	5	0	8	0	0.083	0	6	0	6	0	0.075	0	0.0345253	CG15439
CG16838	CG16838, isoform D OS=Drosophila melanogaster GN=CG16838 PE=2 SV=2	22	0	23	0	0.217	0	17	0	27	0	0.158	0	6	0	8	0	0.051	0	0.0432825	CG16838
CG17143	Isoform B of THO complex protein 7 OS=Drosophila melanogaster GN=thoc7	9	0	10	0	0.23	0	4	2	6	2	0.153	0.031	6	0	8	0	0.195	0	0.0212558	CG17143
CG17569	Gryzun, isoform A OS=Drosophila melanogaster GN=gry PE=2 SV=3	5	0	7	0	0.064	0	12	0	21	0	0.113	0	6	0	15	0	0.047	0	0.0362752	CG17569
CG17949;	Histone H2B OS=Drosophila melanogaster GN=His2B PE=1 SV=2	4	4	20	4	0.285	0.236	5	4	8	7	0.317	0.13	6	0	9	0	0.415	0	0.107833	CG17949;
CG1951	CG1951 OS=Drosophila melanogaster GN=CG1951 PE=2 SV=1	0	0	0	0	0	0	3	2	5	3	0.04	0.013	6	0	9	0	0.095	0	0.155228	CG1951
CG1973	RE62393p OS=Drosophila melanogaster GN=yata PE=2 SV=1	14	0	18	0	0.211	0	10	0	15	0	0.102	0	6	0	9	0	0.076	0	0.0247068	CG1973
CG2096	Serine/threonine-protein phosphatase beta isoform OS=Drosophila melanogaster GN=flw PE=1 SV=1	9	0	24	0	0.333	0	10	0	15	0	0.294	0	6	0	16	0	0.115	0	0.0100864	CG2096
CG2161	Regulator of gene activity OS=Drosophila melanogaster GN=Rga PE=2 SV=2	9	0	17	0	0.144	0	18	0	24	0	0.222	0	6	0	16	0	0.104	0	0.0463676	CG2161
CG2247	CG2247 OS=Drosophila melanogaster GN=CG2247 PE=1 SV=1	13	0	18	0	0.156	0	19	0	28	0	0.23	0	6	0	8	0	0.084	0	0.038911	CG2247
CG2446	CG2446, isoform A OS=Drosophila melanogaster GN=Amun PE=1 SV=1	0	0	0	0	0	0	9	0	18	0	0.215	0	6	0	8	0	0.187	0	0.0996796	CG2446
CG2614	Methyltransferase-like protein 13 OS=Drosophila melanogaster GN=CG2614 PE=2 SV=1	11	0	11	0	0.198	0	19	0	33	0	0.288	0	6	0	11	0	0.098	0	0.0433883	CG2614
CG2677	EG:100G10.3 protein OS=Drosophila melanogaster GN=eIF2B-beta PE=1 SV=1	9	0	9	0	0.284	0	12	0	17	0	0.409	0	6	0	9	0	0.17	0	0.0175494	CG2677
CG30149	Protein rigor mortis OS=Drosophila melanogaster GN=rig PE=1 SV=1	8	0	9	0	0.124	0	9	0	12	0	0.078	0	6	0	9	0	0.079	0	0.00648776	CG30149
CG32343	CG32343, isoform B OS=Drosophila melanogaster GN=CG32343 PE=1 SV=3	5	0	5	0	0.125	0	12	0	17	0	0.198	0	6	0	10	0	0.118	0	0.0362752	CG32343
CG3269	GH01619p OS=Drosophila melanogaster GN=Rab2 PE=1 SV=1	5	0	5	0	0.192	0	7	0	10	0	0.282	0	6	0	11	0	0.263	0	0.00456631	CG3269
CG32732	CG32732 OS=Drosophila melanogaster GN=CG12542 PE=1 SV=2	15	0	17	0	0.326	0	15	2	18	2	0.24	0.017	6	0	11	0	0.076	0	0.0286785	CG32732
CG3400	6-phosphofructo 2-kinase/fructose 2,6-bisphosphatase long form OS=Drosophila melanogaster GN=Pfrx PE=1 SV=2	11	0	11	0	0.172	0	21	0	30	0	0.295	0	6	0	9	0	0.082	0	0.0514174	CG3400
CG3458	DNA topoisomerase 3-beta OS=Drosophila melanogaster GN=Top3beta PE=2 SV=2	2	0	2	0	0.029	0	5	0	7	0	0.065	0	6	0	9	0	0.071	0	0.0345253	CG3458
CG3642	Clipper OS=Drosophila melanogaster GN=Clp PE=1 SV=1	0	0	0	0	0	0	4	0	5	0	0.122	0	6	0	8	0	0.203	0	0.0996796	CG3642
CG3664	Drab5 OS=Drosophila melanogaster GN=Rab5 PE=2 SV=1	5	0	6	0	0.324	0	9	0	11	0	0.205	0	6	0	10	0	0.279	0	0.0154984	CG3664
CG3680	CG3680 OS=Drosophila melanogaster GN=CG3680 PE=1 SV=2	12	0	21	0	0.177	0	13	4	18	5	0.147	0.04	6	0	12	0	0.083	0	0.0167164	CG3680
CG3707	Protein wings apart-like OS=Drosophila melanogaster GN=wapl PE=1 SV=1	3	0	4	0	0.046	0	7	0	10	0	0.045	0	6	0	16	0	0.044	0	0.0236069	CG3707
CG3714	Nicotinate phosphoribosyltransferase OS=Drosophila melanogaster GN=CG3714 PE=2 SV=2	14	0	19	0	0.277	0	18	2	25	2	0.295	0.014	6	0	12	0	0.085	0	0.0359396	CG3714
CG3762	V-type proton ATPase catalytic subunit A isoform 2 OS=Drosophila melanogaster GN=Vha68-2 PE=1 SV=2	19	0	22	0	0.414	0	19	0	38	0	0.318	0	6	0	12	0	0.109	0	0.0386533	CG3762
CG3922	40S ribosomal protein S17 OS=Drosophila melanogaster GN=RpS17 PE=2 SV=2	24	0	96	0	0.702	0	17	0	37	0	0.763	0	6	0	17	0	0.214	0	0.0479933	CG3922
CG4039	DNA replication licensing factor Mcm6 OS=Drosophila melanogaster GN=Mcm6 PE=1 SV=1	15	0	24	0	0.23	0	11	0	17	0	0.136	0	6	0	13	0	0.1	0	0.027363	CG4039
CG4082	DNA replication licensing factor Mcm5 OS=Drosophila melanogaster GN=Mcm5 PE=1 SV=1	21	0	24	0	0.326	0	14	0	21	0	0.213	0	6	0	11	0	0.113	0	0.043768	CG4082
CG4204	Elongin B OS=Drosophila melanogaster GN=Elongin-B PE=1 SV=1	0	0	0	0	0	0	4	0	6	0	0.373	0	6	0	10	0	0.525	0	0.0996796	CG4204
CG4347	RE14081p OS=Drosophila melanogaster GN=UGP PE=1 SV=2	8	0	10	0	0.173	0	7	0	8	0	0.15	0	6	0	9	0	0.152	0	0.00336704	CG4347
CG4389	CG4389, isoform B OS=Drosophila melanogaster GN=CG4389 PE=2 SV=1	2	0	2	0	0.047	0	11	2	15	2	0.164	0.019	6	0	11	0	0.083	0	0.0772959	CG4389
CG4659	BcDNA.GM09489 OS=Drosophila melanogaster GN=Srp54k PE=2 SV=1	21	0	29	0	0.447	0	28	0	40	0	0.486	0	6	0	7	0	0.134	0	0.0528899	CG4659
CG4848	Conserved oligomeric Golgi complex subunit 1 OS=Drosophila melanogaster GN=CG4848 PE=1 SV=1	0	0	0	0	0	0	13	0	20	0	0.151	0	6	0	12	0	0.088	0	0.116923	CG4848
CG5028	CG5028, isoform A OS=Drosophila melanogaster GN=CG5028 PE=2 SV=1	11	0	11	0	0.361	0	9	0	15	0	0.326	0	6	0	10	0	0.177	0	0.0134872	CG5028
CG5450	Dynein light chain 2, cytoplasmic OS=Drosophila melanogaster GN=Cdlc2 PE=1 SV=1	7	0	14	0	0.427	0	5	0	6	0	0.494	0	6	0	17	0	0.225	0	0.00456631	CG5450
CG5625	SD03023p OS=Drosophila melanogaster GN=Vps35 PE=1 SV=4	2	0	3	0	0.057	0	9	0	11	0	0.091	0	6	0	8	0	0.058	0	0.0538657	CG5625
CG5827	60S ribosomal protein L37a OS=Drosophila melanogaster GN=RpL37A PE=1 SV=3	8	3	31	30	0.489	0.38	11	4	31	15	0.696	0.196	6	0	26	0	0.38	0	0.0175677	CG5827
CG5954	LD05287p OS=Drosophila melanogaster GN=l(3)mbt PE=1 SV=1	4	0	10	0	0.026	0	8	2	14	3	0.073	0.007	6	0	13	0	0.041	0	0.0124087	CG5954
CG6303	BIR-containing ubiquitin-conjugating enzyme OS=Drosophila melanogaster GN=Bruce PE=1 SV=3	3	0	3	0	0.008	0	13	0	17	0	0.031	0	6	0	9	0	0.018	0	0.0658646	CG6303
CG6603	Hsc70Cb, isoform A OS=Drosophila melanogaster GN=Hsc70Cb PE=2 SV=1	24	0	26	0	0.413	0	17	2	21	4	0.296	0.015	6	0	10	0	0.106	0	0.0505568	CG6603
CG6756	FI03495p OS=Drosophila melanogaster GN=Tom70 PE=1 SV=2	7	0	9	0	0.163	0	14	3	19	3	0.236	0.054	6	0	9	0	0.105	0	0.0354287	CG6756
CG6814	Cell cycle regulator Mat89Bb OS=Drosophila melanogaster GN=Mat89Bb PE=1 SV=1	19	0	25	0	0.344	0	13	0	13	0	0.194	0	6	0	9	0	0.083	0	0.038911	CG6814
CG6907	Putative elongator complex protein 4 OS=Drosophila melanogaster GN=CG6907 PE=1 SV=1	16	0	34	0	0.41	0	21	0	34	0	0.426	0	6	0	14	0	0.153	0	0.0415142	CG6907
CG7427	DCN1-like protein OS=Drosophila melanogaster GN=CG7427 PE=1 SV=2	5	0	5	0	0.191	0	6	0	14	0	0.382	0	6	0	17	0	0.167	0	0.00172118	CG7427
CG7893	Protein vav OS=Drosophila melanogaster GN=vav PE=2 SV=2	5	0	6	0	0.054	0	9	0	12	0	0.126	0	6	0	8	0	0.09	0	0.0154984	CG7893
CG8235	CG8235 OS=Drosophila melanogaster GN=CG8235 PE=4 SV=1	12	0	15	0	0.325	0	16	0	25	0	0.313	0	6	0	12	0	0.186	0	0.0299489	CG8235
CG8368	CG8368, isoform A OS=Drosophila melanogaster GN=CG8368 PE=1 SV=1	11	0	17	0	0.188	0	14	0	21	0	0.159	0	6	0	11	0	0.123	0	0.0236966	CG8368
CG8392	Proteasome subunit beta type OS=Drosophila melanogaster GN=Prosbeta1 PE=2 SV=1	5	0	10	0	0.393	0	10	0	18	0	0.366	0	6	0	15	0	0.232	0	0.0222335	CG8392
CG8465	Lethal (1) G0222, isoform F OS=Drosophila melanogaster GN=l(1)G0222 PE=4 SV=2	15	0	19	0	0.228	0	14	0	21	0	0.158	0	6	0	8	0	0.055	0	0.0273721	CG8465
CG8479	Optic atrophy 1-like, isoform A OS=Drosophila melanogaster GN=opa1-like PE=3 SV=1	7	0	8	0	0.127	0	13	0	18	0	0.155	0	6	0	8	0	0.076	0	0.0290597	CG8479
CG9113	AP-1gamma, isoform A OS=Drosophila melanogaster GN=AP-1gamma PE=1 SV=2	0	0	0	0	0	0	6	0	8	0	0.048	0	6	0	11	0	0.055	0	0.0917517	CG9113
CG9159	Kruppel homolog 2, isoform B OS=Drosophila melanogaster GN=Kr-h2 PE=4 SV=1	3	0	5	0	0.094	0	5	0	6	0	0.159	0	6	0	15	0	0.156	0	0.0169541	CG9159
CG9246	Nucleolar complex protein 2 homolog OS=Drosophila melanogaster GN=CG9246 PE=1 SV=1	6	0	8	0	0.102	0	23	4	35	6	0.242	0.05	6	0	7	0	0.086	0	0.102605	CG9246
CG9771	Dorsal interacting protein 2 OS=Drosophila melanogaster GN=Dip2 PE=2 SV=2	3	0	5	0	0.15	0	4	0	4	0	0.204	0	6	0	9	0	0.204	0	0.0195062	CG9771
CG9819	Serine/threonine-protein phosphatase 2B catalytic subunit 3 OS=Drosophila melanogaster GN=CanA-14F PE=1 SV=4	4	0	4	0	0.062	0	20	0	34	0	0.269	0	6	0	16	0	0.099	0	0.0926559	CG9819
CG8715	Protein lingerer OS=Drosophila melanogaster GN=lig PE=1 SV=1	13	0	30	0	0.161	0	7	10	12	15	0.105	0.068	5	8	5	24	0.068	0.076	0.291189	CG8715
CG8332	RE08270p OS=Drosophila melanogaster GN=RpS15 PE=2 SV=1	8	2	20	4	0.365	0.081	11	3	38	13	0.365	0.088	5	5	22	29	0.216	0.155	0.0483052	CG8332
CG14206	40S ribosomal protein S10b OS=Drosophila melanogaster GN=RpS10b PE=1 SV=2	7	0	31	0	0.325	0	20	8	49	32	0.506	0.231	5	4	13	29	0.15	0.081	0.147641	CG14206
CG6363	NuA4 complex subunit EAF3 homolog OS=Drosophila melanogaster GN=MRG15 PE=1 SV=1	4	0	6	0	0.144	0	7	3	10	5	0.217	0.045	5	3	19	5	0.193	0.094	0.033869	CG6363
CG6684	40S ribosomal protein S25 OS=Drosophila melanogaster GN=RpS25 PE=1 SV=3	3	3	3	40	0.179	0.179	7	2	11	3	0.299	0.162	5	3	10	12	0.299	0.162	0.0866544	CG6684
CG7283	60S ribosomal protein L10a-2 OS=Drosophila melanogaster GN=RpL10Ab PE=2 SV=2	23	15	101	42	0.53	0.341	12	4	25	12	0.502	0.198	5	3	15	23	0.181	0.213	0.206212	CG7283
CG7883	EIF2B-alpha protein OS=Drosophila melanogaster GN=eIF2B-alpha PE=1 SV=1	5	0	6	0	0.225	0	7	0	11	0	0.157	0	5	3	12	6	0.127	0.062	0.0115186	CG7883
CG13388	A kinase anchor protein 200, isoform D OS=Drosophila melanogaster GN=Akap200 PE=1 SV=1	11	0	16	0	0.136	0	4	0	9	0	0.061	0	5	2	18	4	0.065	0.02	0.050244	CG13388
CG4448	LD16387p OS=Drosophila melanogaster GN=wda PE=2 SV=1	0	0	0	0	0	0	9	3	13	10	0.136	0.036	5	2	10	5	0.055	0.023	0.185289	CG4448
CG5581	Otefin OS=Drosophila melanogaster GN=Ote PE=1 SV=2	4	0	6	0	0.219	0	10	0	14	0	0.304	0	5	2	7	5	0.127	0.057	0.0395038	CG5581
CG8436	CG8436 OS=Drosophila melanogaster GN=CG8436 PE=1 SV=1	15	0	23	0	0.43	0	4	2	5	2	0.157	0.074	5	2	8	3	0.202	0.074	0.0972978	CG8436
CG8478	CG8478, isoform D OS=Drosophila melanogaster GN=CG8478 PE=4 SV=1	9	0	11	0	0.198	0	10	2	15	3	0.179	0.036	5	2	10	3	0.094	0.031	0.016598	CG8478
CG10080	DDB1- and CUL4-associated factor-like 1 OS=Drosophila melanogaster GN=CG10080 PE=1 SV=2	7	0	11	0	0.068	0	16	0	19	0	0.136	0	5	0	8	0	0.034	0	0.0550508	CG10080
CG10372	Fas-associated factor OS=Drosophila melanogaster GN=Faf PE=2 SV=1	7	0	7	0	0.295	0	6	0	7	0	0.142	0	5	0	8	0	0.129	0	0.00456631	CG10372
CG10555	CG10555 OS=Drosophila melanogaster GN=CG10555 PE=2 SV=1	3	0	4	0	0.048	0	4	0	5	0	0.082	0	5	0	12	0	0.048	0	0.0101021	CG10555
CG1065	Succinyl-CoA ligase [GDP-forming] subunit alpha, mitochondrial OS=Drosophila melanogaster GN=Scsalpha PE=2 SV=3	0	0	0	0	0	0	5	4	8	7	0.18	0.091	5	0	10	0	0.122	0	0.202081	CG1065
CG1071	E2F transcription factor 2 OS=Drosophila melanogaster GN=E2f2 PE=1 SV=1	2	0	3	0	0.114	0	7	2	11	2	0.208	0.024	5	0	6	0	0.184	0	0.046678	CG1071
CG1081	GTP-binding protein Rheb homolog OS=Drosophila melanogaster GN=Rheb PE=2 SV=1	4	0	7	0	0.324	0	10	2	17	2	0.385	0.066	5	0	9	0	0.181	0	0.0395038	CG1081
CG10849	Sc2 OS=Drosophila melanogaster GN=Sc2 PE=2 SV=1	7	0	9	0	0.156	0	13	2	17	3	0.275	0.036	5	0	16	0	0.136	0	0.038275	CG10849
CG11033	JmjC domain-containing histone demethylation protein 1 OS=Drosophila melanogaster GN=Jhd1 PE=1 SV=2	7	0	8	0	0.076	0	10	0	13	0	0.093	0	5	0	10	0	0.043	0	0.0185431	CG11033
CG11081	Plexin A, isoform A OS=Drosophila melanogaster GN=plexA PE=1 SV=1	2	0	2	0	0.019	0	5	0	5	0	0.036	0	5	0	7	0	0.026	0	0.0285955	CG11081
CG11115	GH08526p OS=Drosophila melanogaster GN=Ssl1 PE=1 SV=2	7	0	24	0	0.196	0	11	0	16	0	0.269	0	5	0	5	0	0.119	0	0.0245335	CG11115
CG11132	DMAP1 OS=Drosophila melanogaster GN=DMAP1 PE=1 SV=1	19	4	32	8	0.393	0.127	11	0	15	0	0.242	0	5	0	10	0	0.118	0	0.0571483	CG11132
CG11246	GM03174p OS=Drosophila melanogaster GN=Rpb8 PE=2 SV=1	8	0	13	0	0.423	0	2	0	4	0	0.228	0	5	0	8	0	0.215	0	0.0509867	CG11246
CG11963	SkpA associated protein, isoform A OS=Drosophila melanogaster GN=skap PE=1 SV=2	12	0	14	0	0.277	0	6	0	9	0	0.135	0	5	0	9	0	0.112	0	0.0362752	CG11963
CG12153	Protein HIRA homolog OS=Drosophila melanogaster GN=Hira PE=1 SV=2	7	0	8	0	0.1	0	20	0	27	0	0.202	0	5	0	7	0	0.053	0	0.0757028	CG12153
CG12532	Beta adaptin OS=Drosophila melanogaster GN=Bap PE=1 SV=1	5	0	6	0	0.078	0	11	0	16	0	0.096	0	5	0	9	0	0.049	0	0.0364137	CG12532
CG12819	Protein slender lobes OS=Drosophila melanogaster GN=sle PE=1 SV=1	16	0	20	0	0.127	0	2	3	2	3	0.013	0.021	5	0	11	0	0.039	0	0.127349	CG12819
CG13350	CG13350 OS=Drosophila melanogaster GN=CG13350 PE=2 SV=1	6	0	7	0	0.133	0	19	0	28	0	0.258	0	5	0	10	0	0.054	0	0.0784254	CG13350
CG13599	CG13599 OS=Drosophila melanogaster GN=CG13599 PE=1 SV=1	5	0	7	0	0.139	0	9	0	19	0	0.278	0	5	0	6	0	0.183	0	0.0207884	CG13599
CG13628	DNA-directed RNA polymerases I, II, and III subunit RPABC5 OS=Drosophila melanogaster GN=Rpb10 PE=1 SV=1	7	0	9	0	0.746	0	5	0	9	0	0.299	0	5	0	10	0	0.299	0	0.00677997	CG13628
CG13850	CG13850 OS=Drosophila melanogaster GN=CG13850 PE=2 SV=3	6	0	6	0	0.147	0	9	2	12	8	0.177	0.032	5	0	6	0	0.098	0	0.0102153	CG13850
CG14514	Brd8 OS=Drosophila melanogaster GN=Brd8 PE=1 SV=1	8	0	10	0	0.187	0	8	6	15	14	0.185	0.054	5	0	11	0	0.104	0	0.0565726	CG14514
CG15092	CG42351, isoform B OS=Drosophila melanogaster GN=CG15092 PE=1 SV=1	0	0	0	0	0	0	9	5	10	15	0.294	0.081	5	0	12	0	0.119	0	0.197801	CG15092
CG1516	CG1516, isoform I OS=Drosophila melanogaster GN=CG1516 PE=2 SV=1	0	0	0	0	0	0	6	2	6	2	0.057	0.012	5	0	6	0	0.061	0	0.121288	CG1516
CG1518	CG1518 OS=Drosophila melanogaster GN=CG1518 PE=2 SV=1	3	0	3	0	0.041	0	7	0	9	0	0.093	0	5	0	12	0	0.053	0	0.0247068	CG1518
CG15224	Isoform B of Casein kinase II subunit beta OS=Drosophila melanogaster GN=CkIIbeta	8	0	10	0	0.516	0	4	0	5	0	0.298	0	5	0	12	0	0.335	0	0.0210793	CG15224
CG1619	Hmr OS=Drosophila melanogaster GN=Hmr PE=1 SV=1	6	0	8	0	0.067	0	13	0	16	0	0.127	0	5	0	8	0	0.041	0	0.0431678	CG1619
CG1703	CG1703 OS=Drosophila melanogaster GN=CG1703 PE=1 SV=1	8	0	10	0	0.156	0	6	0	7	0	0.078	0	5	0	5	0	0.075	0	0.00942211	CG1703
CG17293	CG17293 OS=Drosophila melanogaster GN=CG17293 PE=1 SV=1	11	3	15	11	0.429	0.142	16	3	24	4	0.423	0.047	5	0	8	0	0.218	0	0.0506814	CG17293
CG17358	Transcription initiation factor TFIID subunit 12 OS=Drosophila melanogaster GN=Taf12 PE=1 SV=1	2	0	2	0	0.148	0	5	0	8	0	0.235	0	5	0	10	0	0.138	0	0.0285955	CG17358
CG17436	FI11703p OS=Drosophila melanogaster GN=vtd PE=1 SV=1	7	0	10	0	0.145	0	10	0	13	0	0.081	0	5	0	11	0	0.099	0	0.0185431	CG17436
CG1768	Protein diaphanous OS=Drosophila melanogaster GN=dia PE=1 SV=2	11	0	11	0	0.17	0	9	0	12	0	0.104	0	5	0	10	0	0.058	0	0.020999	CG1768
CG17952	Lamin-B receptor OS=Drosophila melanogaster GN=LBR PE=1 SV=1	0	0	0	0	0	0	11	0	14	0	0.26	0	5	0	12	0	0.104	0	0.117745	CG17952
CG18292	CG18292 OS=Drosophila melanogaster GN=CG18292-RA PE=1 SV=2	2	0	2	0	0.093	0	5	0	13	0	0.121	0	5	0	13	0	0.178	0	0.0285955	CG18292
CG2261	CstF-50, isoform A OS=Drosophila melanogaster GN=CstF-50 PE=1 SV=1	11	0	17	0	0.309	0	7	0	10	0	0.182	0	5	0	9	0	0.186	0	0.0245335	CG2261
CG2621	Isoform SGG39 of Protein kinase shaggy OS=Drosophila melanogaster GN=sgg	8	0	10	0	0.15	0	12	0	20	0	0.195	0	5	0	13	0	0.054	0	0.0272066	CG2621
CG2922	Protein extra bases OS=Drosophila melanogaster GN=exba PE=1 SV=1	6	0	6	0	0.156	0	8	0	8	0	0.185	0	5	0	21	0	0.102	0	0.00942211	CG2922
CG30467	CG30467 OS=Drosophila melanogaster GN=CG8185 PE=1 SV=1	2	0	2	0	0.046	0	6	0	13	0	0.127	0	5	0	12	0	0.096	0	0.0345253	CG30467
CG31852	LD07294p OS=Drosophila melanogaster GN=Tap42 PE=2 SV=2	13	0	19	0	0.379	0	11	0	20	0	0.297	0	5	0	8	0	0.126	0	0.028315	CG31852
CG3223	CG3223 OS=Drosophila melanogaster GN=CG3223 PE=2 SV=1	3	0	6	0	0.089	0	8	0	11	0	0.275	0	5	0	7	0	0.101	0	0.0334305	CG3223
CG32315	Protein disks lost OS=Drosophila melanogaster GN=dlt PE=1 SV=2	4	0	5	0	0.045	0	4	0	4	0	0.038	0	5	0	6	0	0.052	0	0.00293258	CG32315
CG3248	Conserved oligomeric Golgi complex subunit 3 OS=Drosophila melanogaster GN=Cog3 PE=1 SV=1	5	0	5	0	0.087	0	13	0	16	0	0.144	0	5	0	8	0	0.071	0	0.0513423	CG3248
CG3359	Midline fasciclin, isoform C OS=Drosophila melanogaster GN=mfas PE=2 SV=1	7	0	8	0	0.146	0	15	2	24	2	0.18	0.023	5	0	8	0	0.044	0	0.0530548	CG3359
CG3394	CG3394, isoform B OS=Drosophila melanogaster GN=CG3394 PE=2 SV=1	2	0	2	0	0.047	0	23	3	30	4	0.306	0.029	5	0	10	0	0.095	0	0.151318	CG3394
CG34438	Cap-G, isoform F OS=Drosophila melanogaster GN=Cap-G PE=1 SV=2	15	0	17	0	0.161	0	26	0	48	0	0.201	0	5	0	5	0	0.046	0	0.0636231	CG34438
CG3572	FI02061p OS=Drosophila melanogaster GN=vimar PE=2 SV=1	4	0	4	0	0.115	0	9	0	13	0	0.164	0	5	0	5	0	0.118	0	0.0295625	CG3572
CG3584	QKR58E-3 OS=Drosophila melanogaster GN=qkr58E-3 PE=2 SV=1	3	0	3	0	0.136	0	8	0	13	0	0.158	0	5	0	11	0	0.126	0	0.0334305	CG3584
CG3658	CDC45L OS=Drosophila melanogaster GN=CDC45L PE=1 SV=1	4	0	5	0	0.077	0	12	0	18	0	0.158	0	5	0	7	0	0.075	0	0.0542998	CG3658
CG3678	CG3678 OS=Drosophila melanogaster GN=CG17556-RA PE=1 SV=2	10	0	13	0	0.44	0	9	2	19	2	0.301	0.046	5	0	10	0	0.209	0	0.0131514	CG3678
CG3733	Chromodomain-helicase-DNA-binding protein 1 OS=Drosophila melanogaster GN=Chd1 PE=1 SV=1	2	0	2	0	0.01	0	5	0	5	0	0.029	0	5	0	7	0	0.036	0	0.0285955	CG3733
CG3889	COP9 signalosome complex subunit 1b OS=Drosophila melanogaster GN=CSN1b PE=2 SV=1	9	0	14	0	0.185	0	16	0	28	0	0.265	0	5	0	7	0	0.093	0	0.0448272	CG3889
CG3948	Nonclathrin coat protein zeta-COP OS=Drosophila melanogaster GN=zetaCOP PE=2 SV=2	5	0	9	0	0.259	0	5	0	10	0	0.241	0	5	0	12	0	0.195	0	#DIV/0!	CG3948
CG4045	tRNA (guanine-N(7)-)-methyltransferase OS=Drosophila melanogaster GN=CG4045 PE=1 SV=1	0	0	0	0	0	0	10	0	13	0	0.258	0	5	0	8	0	0.309	0	0.112702	CG4045
CG42351	CG42351, isoform E OS=Drosophila melanogaster GN=CG42351 PE=4 SV=1	0	0	0	0	0	0	13	5	15	15	0.345	0.059	5	0	12	0	0.087	0	0.189066	CG42351
CG4252	Serine/threonine-protein kinase ATR OS=Drosophila melanogaster GN=mei-41 PE=1 SV=2	5	0	7	0	0.043	0	19	0	28	0	0.071	0	5	0	12	0	0.024	0	0.0870605	CG4252
CG4452	CG4452, isoform A OS=Drosophila melanogaster GN=CG4452 PE=2 SV=1	3	0	4	0	0.105	0	18	3	26	3	0.418	0.041	5	0	13	0	0.177	0	0.120794	CG4452
CG4488	Wee1-like protein kinase OS=Drosophila melanogaster GN=wee PE=1 SV=2	14	0	20	0	0.258	0	6	0	8	0	0.079	0	5	0	10	0	0.085	0	0.0498235	CG4488
CG4581	GH13256p OS=Drosophila melanogaster GN=Thiolase PE=2 SV=1	6	0	7	0	0.166	0	13	0	18	0	0.294	0	5	0	10	0	0.113	0	0.0431678	CG4581
CG4720	Protein kinase at 92B, isoform C OS=Drosophila melanogaster GN=Pk92B PE=4 SV=3	0	0	0	0	0	0	13	0	23	0	0.1	0	5	0	7	0	0.061	0	0.126938	CG4720
CG4759	60S ribosomal protein L27 OS=Drosophila melanogaster GN=RpL27 PE=1 SV=1	12	6	16	24	0.43	0.133	9	0	11	0	0.356	0	5	0	11	0	0.193	0	0.0396596	CG4759
CG4953	UPF0533 protein CG4953 OS=Drosophila melanogaster GN=CG4953 PE=2 SV=1	3	0	3	0	0.132	0	13	0	26	0	0.269	0	5	0	13	0	0.089	0	0.0745185	CG4953
CG5266	Proteasome subunit alpha type-2 OS=Drosophila melanogaster GN=Pros25 PE=2 SV=1	11	0	15	0	0.389	0	21	0	37	0	0.462	0	5	0	20	0	0.244	0	0.0591488	CG5266
CG5270	Zinc finger FYVE domain-containing protein 26 homolog OS=Drosophila melanogaster GN=CG5270 PE=1 SV=3	2	0	2	0	0.025	0	15	0	23	0	0.082	0	5	0	5	0	0.032	0	0.101512	CG5270
CG5317	CG5317, isoform A OS=Drosophila melanogaster GN=RpL7-like PE=2 SV=2	10	2	10	4	0.35	0.105	13	4	17	6	0.377	0.078	5	0	9	0	0.128	0	0.0344636	CG5317
CG5632	THO complex subunit 6 OS=Drosophila melanogaster GN=thoc6 PE=1 SV=1	4	0	5	0	0.171	0	7	2	9	2	0.174	0.049	5	0	8	0	0.183	0	0.00782889	CG5632
CG5745	CG5745 OS=Drosophila melanogaster GN=CG5745 PE=1 SV=1	4	0	5	0	0.147	0	13	0	15	0	0.203	0	5	0	6	0	0.136	0	0.0617495	CG5745
CG5854	CG5854, isoform A OS=Drosophila melanogaster GN=CG5854 PE=1 SV=1	10	0	11	0	0.31	0	13	0	21	0	0.369	0	5	0	5	0	0.183	0	0.0285955	CG5854
CG6177	Conserved oligomeric Golgi complex subunit 2 OS=Drosophila melanogaster GN=ldlCp PE=2 SV=1	12	0	16	0	0.244	0	10	0	16	0	0.144	0	5	0	9	0	0.068	0	0.0247775	CG6177
CG6190	Angelman syndrome OS=Drosophila melanogaster GN=Ube3a PE=1 SV=1	5	0	6	0	0.066	0	8	0	12	0	0.115	0	5	0	14	0	0.059	0	0.0133357	CG6190
CG6222	Protein suppressor of sable OS=Drosophila melanogaster GN=su(s) PE=1 SV=2	4	0	6	0	0.049	0	11	0	22	0	0.136	0	5	0	8	0	0.051	0	0.0463908	CG6222
CG6539	BcDNA.LD05563 OS=Drosophila melanogaster GN=Gem3 PE=1 SV=1	4	0	6	0	0.05	0	5	0	8	0	0.082	0	5	0	7	0	0.062	0	0.00253166	CG6539
CG6711	Transcription initiation factor TFIID subunit 2 OS=Drosophila melanogaster GN=Taf2 PE=1 SV=2	4	0	4	0	0.058	0	12	0	15	0	0.105	0	5	0	10	0	0.032	0	0.0542998	CG6711
CG7065	Uncharacterized protein CG7065 OS=Drosophila melanogaster GN=CG7065 PE=1 SV=1	5	0	6	0	0.051	0	6	0	11	0	0.071	0	5	0	9	0	0.075	0	0.00194175	CG7065
CG7113	3-hydroxyacyl-CoA dehydrogenase type-2 OS=Drosophila melanogaster GN=scu PE=1 SV=1	4	2	6	4	0.302	0.11	8	0	12	0	0.341	0	5	0	7	0	0.227	0	0.0167293	CG7113
CG7127	Exocyst complex component 7 OS=Drosophila melanogaster GN=exo70 PE=1 SV=2	2	0	3	0	0.04	0	10	0	15	0	0.131	0	5	0	12	0	0.063	0	0.0679207	CG7127
CG7207	BcDNA.GH07688 OS=Drosophila melanogaster GN=cert PE=1 SV=1	6	0	6	0	0.186	0	9	0	10	0	0.18	0	5	0	8	0	0.106	0	0.0154984	CG7207
CG7643	Altered disjunction OS=Drosophila melanogaster GN=ald PE=1 SV=1	2	0	2	0	0.035	0	9	0	28	0	0.195	0	5	0	17	0	0.083	0	0.0596145	CG7643
CG7788	Caspase OS=Drosophila melanogaster GN=Ice PE=1 SV=2	7	0	12	0	0.245	0	6	0	11	0	0.18	0	5	0	8	0	0.115	0	0.00456631	CG7788
CG8201	Par-1, isoform C OS=Drosophila melanogaster GN=par-1 PE=2 SV=1	5	0	7	0	0.086	0	13	3	20	3	0.119	0.031	5	0	9	0	0.051	0	0.0582122	CG8201
CG8890	GDP-mannose 4,6 dehydratase OS=Drosophila melanogaster GN=Gmd PE=1 SV=2	6	0	6	0	0.149	0	9	0	15	0	0.208	0	5	0	11	0	0.106	0	0.0154984	CG8890
CG9102	Protein bric-a-brac 2 OS=Drosophila melanogaster GN=bab2 PE=1 SV=2	6	0	8	0	0.082	0	6	0	8	0	0.076	0	5	0	5	0	0.07	0	0.00172118	CG9102
CG9205	CG9205, isoform A OS=Drosophila melanogaster GN=CG9205 PE=1 SV=1	4	0	4	0	0.344	0	6	0	8	0	0.299	0	5	0	7	0	0.299	0	0.00653623	CG9205
CG9346	CG9346 OS=Drosophila melanogaster GN=CG9346 PE=1 SV=1	6	0	6	0	0.114	0	15	0	26	0	0.122	0	5	0	7	0	0.05	0	0.0561873	CG9346
CG9638	Transcriptional adapter 2B OS=Drosophila melanogaster GN=Ada2b PE=1 SV=1	3	0	4	0	0.059	0	6	0	9	0	0.09	0	5	0	9	0	0.081	0	0.0169541	CG9638
CG9829	MIP09035p OS=Drosophila melanogaster GN=poly PE=1 SV=1	0	0	0	0	0	0	3	0	5	0	0.163	0	5	0	12	0	0.283	0	0.103941	CG9829
CG9987	tRNA-splicing ligase RtcB homolog OS=Drosophila melanogaster GN=CG9987 PE=1 SV=1	9	0	10	0	0.209	0	8	0	14	0	0.144	0	5	0	5	0	0.077	0	0.0129118	CG9987
CG3195	RE28824p OS=Drosophila melanogaster GN=RpL12 PE=1 SV=1	9	3	50	31	0.497	0.236	10	5	13	9	0.497	0.188	4	5	6	68	0.236	0.236	0.103564	CG3195
CG6724	Ribosome biogenesis protein WDR12 homolog OS=Drosophila melanogaster GN=CG6724 PE=1 SV=1	6	0	6	0	0.107	0	9	6	16	10	0.155	0.102	4	4	7	16	0.11	0.081	0.130944	CG6724
CG1249	Probable small nuclear ribonucleoprotein Sm D2 OS=Drosophila melanogaster GN=SmD2 PE=1 SV=1	3	2	7	7	0.412	0.235	4	2	9	2	0.345	0.084	4	3	7	8	0.328	0.244	0.0237103	CG1249
CG10305	40S ribosomal protein S26 OS=Drosophila melanogaster GN=RpS26 PE=1 SV=1	2	2	6	7	0.211	0.211	5	4	7	8	0.281	0.211	4	2	19	5	0.281	0.079	0.210198	CG10305
CG10306	Eukaryotic translation initiation factor 3 subunit K OS=Drosophila melanogaster GN=CG10306 PE=1 SV=1	19	5	27	7	0.667	0.266	15	2	25	3	0.563	0.05	4	2	11	53	0.23	0.05	0.0792287	CG10306
CG16901	RNA-binding protein squid OS=Drosophila melanogaster GN=sqd PE=1 SV=3	19	2	50	2	0.474	0.061	16	4	23	4	0.253	0.035	4	2	14	36	0.119	0.029	0.0750906	CG16901
CG3564	CHOp24 OS=Drosophila melanogaster GN=CHOp24 PE=1 SV=1	5	0	6	0	0.216	0	8	2	12	2	0.274	0.091	4	2	18	4	0.202	0.043	0.0241933	CG3564
CG4400	CG4400 OS=Drosophila melanogaster GN=CG4400 PE=2 SV=2	2	0	3	0	0.062	0	4	0	6	0	0.147	0	4	2	8	2	0.147	0.066	0.0237103	CG4400
CG6046	Histone deacetylase complex subunit SAP18 OS=Drosophila melanogaster GN=Bin1 PE=1 SV=1	6	0	11	0	0.38	0	6	0	8	0	0.333	0	4	2	5	3	0.24	0.147	0.0038813	CG6046
CG7215	CG7215, isoform A OS=Drosophila melanogaster GN=CG7215 PE=1 SV=1	5	0	6	0	0.385	0	5	2	11	3	0.454	0.192	4	2	5	8	0.362	0.131	0.0108622	CG7215
CG8415	40S ribosomal protein S23 OS=Drosophila melanogaster GN=RpS23 PE=2 SV=1	10	4	67	160	0.476	0.266	16	5	26	10	0.497	0.217	4	2	60	5	0.182	0.056	0.101924	CG8415
CG8599	Protein suppressor of variegation 3-7 OS=Drosophila melanogaster GN=Su(var)3-7 PE=1 SV=4	6	0	7	0	0.053	0	8	0	10	0	0.077	0	4	2	7	3	0.042	0.022	0.0124087	CG8599
CG9853	Golgi to ER traffic protein 4 homolog OS=Drosophila melanogaster GN=CG9853 PE=1 SV=1	0	0	0	0	0	0	7	0	7	0	0.177	0	4	2	5	6	0.127	0.056	0.137094	CG9853
CG10045	Glutathione S-transferase 1-1 OS=Drosophila melanogaster GN=GstD1 PE=1 SV=1	7	0	11	0	0.278	0	2	0	3	0	0.091	0	4	0	10	0	0.182	0	0.0482188	CG10045
CG10572	Cyclin-dependent kinase 8 OS=Drosophila melanogaster GN=Cdk8 PE=1 SV=2	2	0	2	0	0.055	0	9	0	18	0	0.156	0	4	0	16	0	0.11	0	0.0691363	CG10572
CG10620	LD22449p OS=Drosophila melanogaster GN=Tsf2 PE=1 SV=1	7	0	8	0	0.144	0	7	0	7	0	0.087	0	4	0	7	0	0.065	0	0.0133357	CG10620
CG10687	Asparaginyl-tRNA synthetase OS=Drosophila melanogaster GN=Aats-asn PE=2 SV=1	17	0	18	0	0.249	0	11	2	11	3	0.195	0.016	4	0	7	0	0.065	0	0.0563425	CG10687
CG10718	LP17758p OS=Drosophila melanogaster GN=neb PE=2 SV=1	7	0	10	0	0.139	0	9	0	10	0	0.07	0	4	0	9	0	0.047	0	0.0221815	CG10718
CG10805	HEAT repeat-containing protein 1 homolog OS=Drosophila melanogaster GN=l(2)k09022 PE=2 SV=2	7	0	7	0	0.059	0	13	0	22	0	0.085	0	4	0	7	0	0.021	0	0.0470892	CG10805
CG10881	Eukaryotic translation initiation factor 3 subunit G-2 OS=Drosophila melanogaster GN=eIF3-S4-2 PE=2 SV=1	4	0	8	0	0.081	0	4	0	5	0	0.081	0	4	0	15	0	0.073	0	#DIV/0!	CG10881
CG10897	Toutatis, isoform E OS=Drosophila melanogaster GN=tou PE=4 SV=1	9	0	9	0	0.059	0	23	0	29	0	0.09	0	4	0	6	0	0.012	0	0.08464	CG10897
CG11100	Mes2, isoform B OS=Drosophila melanogaster GN=Mes2 PE=2 SV=1	5	0	5	0	0.199	0	8	0	11	0	0.188	0	4	0	9	0	0.087	0	0.0210793	CG11100
CG11266	CG11266, isoform A OS=Drosophila melanogaster GN=CG11266 PE=1 SV=1	6	0	6	0	0.21	0	5	0	8	0	0.123	0	4	0	5	0	0.066	0	0.00653623	CG11266
CG11734	Probable E3 ubiquitin-protein ligase HERC2 OS=Drosophila melanogaster GN=HERC2 PE=1 SV=3	0	0	0	0	0	0	6	0	10	0	0.016	0	4	0	8	0	0.009	0	0.0996796	CG11734
CG11984	CG11984, isoform D OS=Drosophila melanogaster GN=CG11984 PE=1 SV=1	5	0	8	0	0.244	0	12	0	21	0	0.187	0	4	0	11	0	0.06	0	0.0542998	CG11984
CG12031	Mediator of RNA polymerase II transcription subunit 14 OS=Drosophila melanogaster GN=MED14 PE=1 SV=4	2	0	2	0	0.012	0	0	0	0	0	0	0	4	0	6	0	0.032	0	0.112702	CG12031
CG12196	Histone-lysine N-methyltransferase eggless OS=Drosophila melanogaster GN=egg PE=1 SV=1	3	0	3	0	0.026	0	6	0	6	0	0.061	0	4	0	8	0	0.044	0	0.0195062	CG12196
CG12234	LD26789p OS=Drosophila melanogaster GN=Ranbp21 PE=2 SV=1	5	0	6	0	0.047	0	5	0	6	0	0.056	0	4	0	8	0	0.053	0	0.00253166	CG12234
CG12750	Pre-mRNA-splicing factor CWC22 homolog OS=Drosophila melanogaster GN=ncm PE=1 SV=3	4	0	4	0	0.023	0	3	0	3	0	0.019	0	4	0	5	0	0.028	0	0.0040817	CG12750
CG1309	CG1309 OS=Drosophila melanogaster GN=CG1309 PE=2 SV=1	2	0	2	0	0.052	0	9	0	17	0	0.162	0	4	0	9	0	0.067	0	0.0691363	CG1309
CG13090	Adenylyltransferase and sulfurtransferase MOCS3 OS=Drosophila melanogaster GN=CG13090 PE=1 SV=1	11	0	13	0	0.342	0	8	0	13	0	0.318	0	4	0	9	0	0.132	0	0.0316838	CG13090
CG1316	CG1316 OS=Drosophila melanogaster GN=CG1316 PE=1 SV=2	3	0	4	0	0.07	0	7	0	7	0	0.147	0	4	0	7	0	0.115	0	0.0301908	CG1316
CG13418	DNA-directed RNA polymerase subunit OS=Drosophila melanogaster GN=RpI12 PE=1 SV=1	3	0	3	0	0.192	0	2	0	3	0	0.192	0	4	0	9	0	0.283	0	0.0175494	CG13418
CG1354	GTP-binding protein CG1354 OS=Drosophila melanogaster GN=CG1354 PE=1 SV=1	13	0	21	0	0.239	0	6	0	12	0	0.209	0	4	0	4	0	0.136	0	0.053377	CG1354
CG1362	Cdc2-related-kinase, isoform A OS=Drosophila melanogaster GN=cdc2rk PE=2 SV=1	8	0	10	0	0.225	0	7	0	14	0	0.212	0	4	0	7	0	0.121	0	0.0170879	CG1362
CG13688	Ipk2 OS=Drosophila melanogaster GN=Ipk2 PE=1 SV=2	5	0	5	0	0.214	0	8	0	10	0	0.207	0	4	0	9	0	0.104	0	0.0210793	CG13688
CG14616	Isoform G of Inositol hexakisphosphate and diphosphoinositol-pentakisphosphate kinase OS=Drosophila melanogaster GN=l(1)G0196	8	0	10	0	0.065	0	17	2	26	2	0.146	0.016	4	0	10	0	0.026	0	0.0701377	CG14616
CG14716	Heme oxygenase OS=Drosophila melanogaster GN=Ho PE=2 SV=1	3	0	6	0	0.111	0	5	0	6	0	0.118	0	4	0	12	0	0.098	0	0.0101021	CG14716
CG1475	60S ribosomal protein L13a OS=Drosophila melanogaster GN=RpL13A PE=1 SV=1	17	4	91	58	0.366	0.156	4	0	7	0	0.171	0	4	0	9	0	0.127	0	0.121544	CG1475
CG1483	205 kDa microtubule-associated protein OS=Drosophila melanogaster GN=Map205 PE=1 SV=2	2	0	3	0	0.034	0	10	0	14	0	0.118	0	4	0	12	0	0.054	0	0.078363	CG1483
CG1513	Oxysterol-binding protein OS=Drosophila melanogaster GN=CG1513 PE=1 SV=2	7	0	7	0	0.112	0	13	0	21	0	0.226	0	4	0	4	0	0.051	0	0.0470892	CG1513
CG15669	GH09802p OS=Drosophila melanogaster GN=MESK2 PE=2 SV=1	2	0	3	0	0.052	0	2	2	11	3	0.062	0.029	4	0	8	0	0.101	0	0.0505958	CG15669
CG15817	BcDNA.LD22910 OS=Drosophila melanogaster GN=BcDNA:LD22910 PE=1 SV=1	0	0	0	0	0	0	4	0	4	0	0.06	0	4	0	4	0	0.056	0	0.0917517	CG15817
CG1622	CG1622 OS=Drosophila melanogaster GN=CG1622-RA PE=1 SV=1	10	0	13	0	0.281	0	8	0	15	0	0.241	0	4	0	9	0	0.08	0	0.0266354	CG1622
CG1633	Peroxiredoxin 1 OS=Drosophila melanogaster GN=Jafrac1 PE=1 SV=1	8	0	13	0	0.392	0	6	0	13	0	0.34	0	4	0	4	0	0.119	0	0.0175494	CG1633
CG17299	LD22662p OS=Drosophila melanogaster GN=SNF4Agamma PE=2 SV=2	2	0	2	0	0.015	0	4	2	5	3	0.057	0.011	4	0	6	0	0.027	0	0.0237103	CG17299
CG17322	CG17322, isoform A OS=Drosophila melanogaster GN=BEST:LD25345 PE=2 SV=2	2	0	2	0	0.05	0	8	0	17	0	0.199	0	4	0	8	0	0.085	0	0.0590414	CG17322
CG17556	CG17556 OS=Drosophila melanogaster GN=CG17556-RA PE=2 SV=1	10	0	13	0	0.44	0	9	2	19	2	0.301	0.046	4	0	5	0	0.17	0	0.0252648	CG17556
CG17958	Serendipity locus protein delta OS=Drosophila melanogaster GN=Sry-delta PE=1 SV=2	4	0	5	0	0.115	0	5	0	12	0	0.092	0	4	0	7	0	0.074	0	0.00293258	CG17958
CG18067	CG18067 OS=Drosophila melanogaster GN=CG18067 PE=4 SV=1	3	0	9	0	0.086	0	2	0	2	0	0.086	0	4	0	6	0	0.131	0	0.0175494	CG18067
CG18596	CG18596 OS=Drosophila melanogaster GN=CG18596 PE=2 SV=2	0	0	0	0	0	0	6	0	16	0	0.043	0	4	0	7	0	0.045	0	0.0996796	CG18596
CG1965	CG1965 OS=Drosophila melanogaster GN=CG1965 PE=1 SV=3	0	0	0	0	0	0	4	5	10	6	0.061	0.038	4	0	11	0	0.054	0	0.332457	CG1965
CG1975	DNAation factor-related protein 2, isoform B OS=Drosophila melanogaster GN=Drep-2 PE=4 SV=1	0	0	0	0	0	0	0	0	0	0	0	0	4	0	8	0	0.053	0	0.211325	CG1975
CG2050	DNA-binding protein modulo OS=Drosophila melanogaster GN=mod PE=1 SV=2	9	0	11	0	0.201	0	8	0	9	0	0.118	0	4	0	6	0	0.07	0	0.0222335	CG2050
CG2092	Isoform A of Actin-binding protein anillin OS=Drosophila melanogaster GN=scra	0	0	0	0	0	0	5	2	5	3	0.039	0.028	4	0	7	0	0.047	0	0.132092	CG2092
CG2204	Isoform B of Guanine nucleotide-binding protein G(o) subunit alpha 47A OS=Drosophila melanogaster GN=G-oalpha47A	4	0	4	0	0.099	0	2	0	2	0	0.054	0	4	0	10	0	0.085	0	0.0188748	CG2204
CG2682	D4, isoform C OS=Drosophila melanogaster GN=d4 PE=4 SV=1	5	0	5	0	0.119	0	8	0	11	0	0.202	0	4	0	33	0	0.073	0	0.0210793	CG2682
CG2835	G protein salpha 60A, isoform D OS=Drosophila melanogaster GN=G-salpha60A PE=4 SV=1	3	0	3	0	0.052	0	7	0	8	0	0.161	0	4	0	8	0	0.062	0	0.0301908	CG2835
CG2905	Transcription-associated protein 1 OS=Drosophila melanogaster GN=Nipped-A PE=1 SV=3	7	0	9	0	0.031	0	20	0	26	0	0.052	0	4	0	4	0	0.016	0	0.0850033	CG2905
CG2929	Pi4KIIalpha, isoform D OS=Drosophila melanogaster GN=Pi4KIIalpha PE=4 SV=1	0	0	0	0	0	0	8	0	9	0	0.117	0	4	0	8	0	0.052	0	0.112702	CG2929
CG2976	CG2976 OS=Drosophila melanogaster GN=CG2976 PE=2 SV=1	2	0	2	0	0.121	0	4	0	7	0	0.136	0	4	0	9	0	0.13	0	0.0188748	CG2976
CG30122	CG30122, isoform D OS=Drosophila melanogaster GN=CG30122 PE=2 SV=1	9	0	9	0	0.093	0	12	0	25	0	0.081	0	4	0	13	0	0.045	0	0.03512	CG30122
CG30185	CG30185 OS=Drosophila melanogaster GN=CG30185;Gr59f PE=2 SV=1	7	0	9	0	0.251	0	8	0	9	0	0.263	0	4	0	7	0	0.145	0	0.0170879	CG30185
CG3024	Torsin-like protein OS=Drosophila melanogaster GN=torp4a PE=2 SV=2	9	0	11	0	0.353	0	13	0	15	0	0.318	0	4	0	6	0	0.124	0	0.039805	CG3024
CG30349	CG30349 OS=Drosophila melanogaster GN=CG30349-RA PE=2 SV=1	17	0	24	0	0.363	0	16	4	24	6	0.235	0.021	4	0	7	0	0.106	0	0.0539488	CG30349
CG3093	Vacuolar protein sorting-associated protein 18 homolog OS=Drosophila melanogaster GN=dor PE=1 SV=3	8	0	8	0	0.167	0	17	2	24	2	0.173	0.009	4	0	7	0	0.024	0	0.0701377	CG3093
CG31048	CG31048, isoform C OS=Drosophila melanogaster GN=CG31048 PE=4 SV=1	0	0	0	0	0	0	9	0	9	0	0.051	0	4	0	4	0	0.023	0	0.118963	CG31048
CG32045	Protein furry OS=Drosophila melanogaster GN=fry PE=1 SV=2	0	0	0	0	0	0	9	0	12	0	0.038	0	4	0	6	0	0.012	0	0.118963	CG32045
CG32350	CG32350 OS=Drosophila melanogaster GN=CG32350 PE=2 SV=1	0	0	0	0	0	0	7	0	10	0	0.076	0	4	0	5	0	0.057	0	0.106137	CG32350
CG32441	CG32441, isoform C OS=Drosophila melanogaster GN=CG32441 PE=2 SV=2	2	0	2	0	0.07	0	5	0	5	0	0.145	0	4	0	7	0	0.145	0	0.0266354	CG32441
CG3249	GM14014p OS=Drosophila melanogaster GN=yu PE=2 SV=2	11	0	12	0	0.357	0	9	0	13	0	0.157	0	4	0	4	0	0.087	0	0.0307629	CG3249
CG32795	Transmembrane protein 120 homolog OS=Drosophila melanogaster GN=CG32795 PE=1 SV=1	3	0	3	0	0.057	0	8	3	12	3	0.202	0.059	4	0	7	0	0.119	0	0.0522301	CG32795
CG33104	Transmembrane emp24 domain-containing protein eca OS=Drosophila melanogaster GN=eca PE=1 SV=2	5	0	10	0	0.181	0	7	4	10	4	0.315	0.065	4	0	11	0	0.194	0	0.038089	CG33104
CG3320	FI01544p OS=Drosophila melanogaster GN=Rab1 PE=1 SV=1	5	0	6	0	0.302	0	4	0	8	0	0.259	0	4	0	7	0	0.2	0	0.00293258	CG3320
CG3333	H/ACA ribonucleoprotein complex subunit 4 OS=Drosophila melanogaster GN=Nop60B PE=1 SV=1	9	0	14	0	0.13	0	6	3	8	8	0.136	0.051	4	0	9	0	0.094	0	0.02279	CG3333
CG3338	CG3338 OS=Drosophila melanogaster GN=CG3338 PE=1 SV=2	4	0	4	0	0.108	0	10	0	13	0	0.091	0	4	0	10	0	0.057	0	0.047733	CG3338
CG33525	REST corepressor OS=Drosophila melanogaster GN=CoRest PE=1 SV=1	6	0	7	0	0.166	0	15	0	21	0	0.275	0	4	0	10	0	0.1	0	0.0663798	CG33525
CG33554	Nipped-A, isoform D OS=Drosophila melanogaster GN=Nipped-A PE=4 SV=1	9	0	11	0	0.036	0	20	0	26	0	0.052	0	4	0	4	0	0.016	0	0.072688	CG33554
CG34001	CG34001 OS=Drosophila melanogaster GN=CG34001 PE=4 SV=2	7	0	9	0	0.43	0	8	0	15	0	0.369	0	4	0	6	0	0.168	0	0.0170879	CG34001
CG3436	CG3436, isoform A OS=Drosophila melanogaster GN=CG3436 PE=2 SV=1	16	0	22	0	0.363	0	6	2	6	3	0.277	0.037	4	0	11	0	0.199	0	0.0800934	CG3436
CG3527	Ribosomal RNA small subunit methyltransferase NEP1 OS=Drosophila melanogaster GN=CG3527 PE=3 SV=2	8	0	14	0	0.349	0	9	0	18	0	0.25	0	4	0	11	0	0.194	0	0.0222335	CG3527
CG40448	Serine/threonine-protein phosphatase OS=Drosophila melanogaster GN=Pp1-Y2 PE=3 SV=2	3	0	5	0	0.052	0	3	0	3	0	0.076	0	4	0	9	0	0.076	0	0.00492623	CG40448
CG40494	GH15984p OS=Drosophila melanogaster GN=RhoGAP1A PE=2 SV=1	5	0	7	0	0.056	0	5	0	6	0	0.05	0	4	0	7	0	0.047	0	0.00253166	CG40494
CG4379	cAMP-dependent protein kinase catalytic subunit OS=Drosophila melanogaster GN=Pka-C1 PE=1 SV=3	3	0	4	0	0.102	0	4	0	5	0	0.093	0	4	0	5	0	0.099	0	0.0040817	CG4379
CG4454	Isoform B of Borealin OS=Drosophila melanogaster GN=borr	6	0	6	0	0.326	0	5	0	6	0	0.172	0	4	0	10	0	0.154	0	0.00653623	CG4454
CG4457	Signal recognition particle 19 kDa protein OS=Drosophila melanogaster GN=Srp19 PE=2 SV=2	6	3	7	8	0.494	0.238	7	2	7	5	0.35	0.081	4	0	6	0	0.306	0	0.016339	CG4457
CG4463	Heat shock protein 23 OS=Drosophila melanogaster GN=Hsp23 PE=1 SV=2	13	0	23	0	0.527	0	7	0	12	0	0.392	0	4	0	7	0	0.285	0	0.0470892	CG4463
CG45760	CG40625 OS=Drosophila melanogaster GN=CG40625 PE=3 SV=2	0	0	0	0	0	0	0	0	0	0	0	0	4	0	8	0	0.013	0	0.211325	CG45760
CG4658	CG4658, isoform A OS=Drosophila melanogaster GN=CG4658 PE=1 SV=1	0	0	0	0	0	0	7	0	10	0	0.179	0	4	0	7	0	0.105	0	0.106137	CG4658
CG4825	CG4825 OS=Drosophila melanogaster GN=CG4825 PE=1 SV=1	0	0	0	0	0	0	4	0	5	0	0.131	0	4	0	4	0	0.114	0	0.0917517	CG4825
CG4912	Probable elongation factor 1-delta OS=Drosophila melanogaster GN=eEF1delta PE=1 SV=1	12	2	15	4	0.402	0.086	5	0	6	0	0.184	0	4	0	6	0	0.145	0	0.0600263	CG4912
CG4951	Uncharacterized protein CG4951 OS=Drosophila melanogaster GN=CG4951 PE=1 SV=1	21	0	37	0	0.363	0	7	4	9	5	0.186	0.063	4	0	7	0	0.147	0	0.10594	CG4951
CG5003	CG5003 OS=Drosophila melanogaster GN=CG5003-RA PE=2 SV=1	2	0	2	0	0.042	0	8	0	9	0	0.1	0	4	0	7	0	0.073	0	0.0590414	CG5003
CG5014	LD30122p OS=Drosophila melanogaster GN=Vap-33-1 PE=1 SV=1	9	0	9	0	0.283	0	19	2	28	2	0.42	0.041	4	0	8	0	0.149	0	0.0743074	CG5014
CG5098	Isoform B of Uncharacterized protein CG5098 OS=Drosophila melanogaster GN=CG5098	6	0	20	0	0.111	0	6	4	8	4	0.048	0.031	4	0	12	0	0.038	0	0.0382252	CG5098
CG5205	CG5205 OS=Drosophila melanogaster GN=CG5205 PE=2 SV=2	4	0	4	0	0.047	0	9	0	11	0	0.054	0	4	0	6	0	0.022	0	0.0383434	CG5205
CG5417	Srp14, isoform B OS=Drosophila melanogaster GN=Srp14 PE=2 SV=2	4	0	13	0	0.431	0	4	0	4	0	0.422	0	4	0	12	0	0.33	0	#DIV/0!	CG5417
CG5537	CG5537 OS=Drosophila melanogaster GN=CG5537 PE=1 SV=1	6	0	14	0	0.341	0	8	2	26	2	0.556	0.069	4	0	6	0	0.238	0	0.0124087	CG5537
CG5602	DNA ligase 1 OS=Drosophila melanogaster GN=DNA-ligI PE=1 SV=2	19	0	22	0	0.309	0	12	0	17	0	0.24	0	4	0	5	0	0.067	0	0.0573519	CG5602
CG5776	CG5776 OS=Drosophila melanogaster GN=CG5776 PE=2 SV=1	14	0	17	0	0.26	0	20	0	26	0	0.213	0	4	0	4	0	0.061	0	0.056578	CG5776
CG5821	Quaking related 58E-2 OS=Drosophila melanogaster GN=qkr58E-2 PE=2 SV=1	2	0	2	0	0.048	0	6	0	6	0	0.139	0	4	0	9	0	0.06	0	0.03709	CG5821
CG5913	CG5913 OS=Drosophila melanogaster GN=CG5913 PE=1 SV=1	7	0	10	0	0.143	0	10	3	15	3	0.211	0.035	4	0	6	0	0.126	0	0.0265598	CG5913
CG6143	Isoform C of Zinc finger protein on ecdysone puffs OS=Drosophila melanogaster GN=Pep	4	0	6	0	0.058	0	2	0	2	0	0.046	0	4	0	7	0	0.091	0	0.0188748	CG6143
CG6159	Exocyst complex component 5 OS=Drosophila melanogaster GN=sec10 PE=1 SV=1	5	0	5	0	0.083	0	10	0	15	0	0.113	0	4	0	4	0	0.069	0	0.0380942	CG6159
CG6341	Probable elongation factor 1-beta OS=Drosophila melanogaster GN=Ef1beta PE=1 SV=3	12	3	21	6	0.626	0.198	4	0	4	0	0.144	0	4	0	9	0	0.194	0	0.0783169	CG6341
CG6382	Ef1alpha-like factor OS=Drosophila melanogaster GN=Elf PE=1 SV=1	0	0	0	0	0	0	11	0	18	0	0.191	0	4	0	11	0	0.053	0	0.130052	CG6382
CG6502	Histone-lysine N-methyltransferase E(z) OS=Drosophila melanogaster GN=E(z) PE=1 SV=2	10	0	12	0	0.107	0	13	0	18	0	0.164	0	4	0	4	0	0.076	0	0.0383097	CG6502
CG6707	CG6707, isoform B OS=Drosophila melanogaster GN=CG6707 PE=2 SV=2	0	0	0	0	0	0	2	0	3	0	0.1	0	4	0	7	0	0.095	0	0.112702	CG6707
CG6718	Calcium-independent phospholipase A2 VIA, isoform A OS=Drosophila melanogaster GN=iPLA2-VIA PE=2 SV=3	9	0	12	0	0.197	0	9	0	15	0	0.124	0	4	0	8	0	0.072	0	0.0239834	CG6718
CG6750	CG6750 OS=Drosophila melanogaster GN=CG6750 PE=2 SV=1	4	0	4	0	0.336	0	2	0	2	0	0.109	0	4	0	6	0	0.219	0	0.0188748	CG6750
CG6759	Cdc16 OS=Drosophila melanogaster GN=cdc16 PE=2 SV=1	4	0	5	0	0.11	0	18	2	28	2	0.22	0.028	4	0	4	0	0.067	0	0.113439	CG6759
CG6778	Glycyl-tRNA synthetase, isoform B OS=Drosophila melanogaster GN=Aats-gly PE=2 SV=1	18	0	19	0	0.26	0	11	2	14	2	0.152	0.018	4	0	7	0	0.065	0	0.0606606	CG6778
CG6801	LD20590p OS=Drosophila melanogaster GN=l(3)j2D3 PE=1 SV=1	6	0	6	0	0.141	0	5	5	7	8	0.141	0.092	4	0	15	0	0.092	0	0.0872273	CG6801
CG6860	CG6860, isoform A OS=Drosophila melanogaster GN=Lrch PE=1 SV=1	14	0	16	0	0.194	0	5	0	9	0	0.103	0	4	0	7	0	0.07	0	0.0687163	CG6860
CG6990	HP1c OS=Drosophila melanogaster GN=HP1c PE=2 SV=1	5	0	8	0	0.283	0	5	0	8	0	0.207	0	4	0	4	0	0.097	0	0.00253166	CG6990
CG7011	CG7011 OS=Drosophila melanogaster GN=CG7011 PE=2 SV=1	0	0	0	0	0	0	2	0	5	0	0.046	0	4	0	7	0	0.105	0	0.112702	CG7011
CG7139	CG7139, isoform A OS=Drosophila melanogaster GN=CG7139 PE=1 SV=1	5	0	6	0	0.083	0	11	0	15	0	0.112	0	4	0	6	0	0.047	0	0.0463908	CG7139
CG7238	Septin-interacting protein 1 OS=Drosophila melanogaster GN=sip1 PE=1 SV=1	2	0	2	0	0.031	0	11	4	21	5	0.187	0.046	4	0	8	0	0.057	0	0.12586	CG7238
CG7392	Connector of kinase to AP-1, isoform A OS=Drosophila melanogaster GN=Cka PE=1 SV=2	0	0	0	0	0	0	12	0	15	0	0.104	0	4	0	4	0	0.048	0	0.134852	CG7392
CG7398	Transportin, isoform A OS=Drosophila melanogaster GN=Trn PE=1 SV=1	8	0	12	0	0.132	0	20	0	35	0	0.243	0	4	0	5	0	0.054	0	0.078363	CG7398
CG7528	LD22577p OS=Drosophila melanogaster GN=Uba2 PE=2 SV=1	5	0	6	0	0.097	0	13	0	14	0	0.151	0	4	0	22	0	0.064	0	0.0617495	CG7528
CG7622	60S ribosomal protein L36 OS=Drosophila melanogaster GN=RpL36 PE=3 SV=1	7	3	15	8	0.278	0.261	6	3	7	10	0.322	0.096	4	0	7	0	0.165	0	0.0261302	CG7622
CG7870	GH09240p OS=Drosophila melanogaster GN=wol PE=2 SV=1	5	0	5	0	0.199	0	0	0	0	0	0	0	4	0	7	0	0.135	0	0.0942487	CG7870
CG7939	60S ribosomal protein L32 OS=Drosophila melanogaster GN=RpL32 PE=1 SV=3	10	7	18	19	0.299	0.276	8	0	8	0	0.358	0	4	0	9	0	0.097	0	0.0839257	CG7939
CG8013	Polycomb protein Su(z)12 OS=Drosophila melanogaster GN=Su(z)12 PE=1 SV=1	15	0	20	0	0.241	0	13	0	17	0	0.144	0	4	0	8	0	0.071	0	0.0437872	CG8013
CG8379	CG8379, isoform B OS=Drosophila melanogaster GN=CG8379 PE=2 SV=1	5	0	7	0	0.117	0	10	2	13	2	0.144	0.01	4	0	6	0	0.04	0	0.0395038	CG8379
CG8397	CG8397 OS=Drosophila melanogaster GN=CG8397 PE=4 SV=1	6	0	8	0	0.286	0	7	0	17	0	0.233	0	4	0	12	0	0.106	0	0.0116878	CG8397
CG8402	GH12714p OS=Drosophila melanogaster GN=PpD3 PE=2 SV=1	3	0	4	0	0.09	0	10	0	14	0	0.198	0	4	0	6	0	0.085	0	0.0610619	CG8402
CG8430	Glutamate oxaloacetate transaminase 1, isoform A OS=Drosophila melanogaster GN=Got1 PE=2 SV=1	7	0	8	0	0.13	0	10	0	12	0	0.204	0	4	0	9	0	0.108	0	0.0280601	CG8430
CG8472	Calmodulin OS=Drosophila melanogaster GN=Cam PE=1 SV=2	3	0	5	0	0.423	0	4	2	4	3	0.262	0.141	4	0	8	0	0.242	0	0.0142979	CG8472
CG8491	Mediator of RNA polymerase II transcription subunit 12 OS=Drosophila melanogaster GN=kto PE=1 SV=2	8	0	9	0	0.056	0	14	0	18	0	0.055	0	4	0	12	0	0.021	0	0.0482188	CG8491
CG8677	CG8677 OS=Drosophila melanogaster GN=CG8677 PE=2 SV=2	4	0	4	0	0.02	0	7	3	7	3	0.024	0.007	4	0	4	0	0.017	0	0.0237103	CG8677
CG8822	Serine/threonine-protein phosphatase OS=Drosophila melanogaster GN=PpD6 PE=2 SV=1	3	0	5	0	0.045	0	4	0	4	0	0.095	0	4	0	9	0	0.065	0	0.0040817	CG8822
CG9007	CG9007 OS=Drosophila melanogaster GN=CG9007 PE=1 SV=3	10	0	20	0	0.058	0	0	0	0	0	0	0	4	0	6	0	0.023	0	0.124761	CG9007
CG9035	GM12291p OS=Drosophila melanogaster GN=Tapdelta PE=1 SV=1	9	0	13	0	0.482	0	8	0	36	0	0.536	0	4	0	8	0	0.217	0	0.0222335	CG9035
CG9207	Gas41 OS=Drosophila melanogaster GN=Gas41 PE=1 SV=2	4	0	4	0	0.141	0	7	2	8	3	0.229	0.04	4	0	12	0	0.115	0	0.0142911	CG9207
CG9291	Elongin C, isoform A OS=Drosophila melanogaster GN=Elongin-C PE=1 SV=1	8	0	10	0	0.393	0	6	2	6	2	0.393	0.085	4	0	13	0	0.368	0	0.0124087	CG9291
CG9351	Isoform D of Serine/threonine-protein phosphatase 4 regulatory subunit 3 OS=Drosophila melanogaster GN=flfl	6	0	7	0	0.084	0	10	0	10	0	0.085	0	4	0	8	0	0.036	0	0.0317071	CG9351
CG9588	CG9588 OS=Drosophila melanogaster GN=CG9588 PE=1 SV=1	0	0	0	0	0	0	3	0	4	0	0.186	0	4	0	8	0	0.177	0	0.0958548	CG9588
CG9615	FI07663p OS=Drosophila melanogaster GN=tex PE=2 SV=1	8	0	9	0	0.203	0	7	0	11	0	0.256	0	4	0	6	0	0.122	0	0.0170879	CG9615
CG9635	RhoGEF2, isoform D OS=Drosophila melanogaster GN=RhoGEF2 PE=1 SV=1	0	0	0	0	0	0	12	3	18	4	0.048	0.008	4	0	6	0	0.02	0	0.172112	CG9635
CG9674	CG9674, isoform A OS=Drosophila melanogaster GN=CG9674 PE=1 SV=2	4	0	5	0	0.037	0	4	0	5	0	0.034	0	4	0	5	0	0.07	0	#DIV/0!	CG9674
CG9940	Probable glutamine-dependent NAD(+) synthetase OS=Drosophila melanogaster GN=CG9940 PE=1 SV=1	0	0	0	0	0	0	8	0	9	0	0.186	0	4	0	5	0	0.05	0	0.112702	CG9940
CG9984	Negative elongation factor D OS=Drosophila melanogaster GN=TH1 PE=1 SV=2	8	0	17	0	0.189	0	8	0	10	0	0.102	0	4	0	6	0	0.073	0	0.0188748	CG9984
CG9998	Splicing factor U2AF 50 kDa subunit OS=Drosophila melanogaster GN=U2af50 PE=1 SV=1	2	0	2	0	0.077	0	4	0	5	0	0.101	0	4	0	7	0	0.077	0	0.0188748	CG9998
CG11990	Hyrax OS=Drosophila melanogaster GN=hyx PE=2 SV=1	8	3	9	5	0.175	0.065	10	0	11	0	0.171	0	3	8	6	23	0.039	0.132	0.173605	CG11990
CG10220	CG33505 OS=Drosophila melanogaster GN=U3-55K PE=2 SV=1	6	0	16	0	0.198	0	8	7	9	13	0.186	0.083	3	4	5	10	0.083	0.066	0.235961	CG10220
CG15191	Enhancer of yellow 2 transcription factor OS=Drosophila melanogaster GN=e(y)2 PE=1 SV=1	6	0	10	0	0.455	0	4	2	4	4	0.327	0.158	3	2	8	7	0.426	0.158	0.028819	CG15191
CG15356	CG15356 OS=Drosophila melanogaster GN=CG15356 PE=1 SV=1	7	0	9	0	0.075	0	10	0	12	0	0.182	0	3	2	6	3	0.028	0.02	0.0428733	CG15356
CG17268	Proteasome subunit alpha type-7-1A OS=Drosophila melanogaster GN=Pros28.1A PE=2 SV=2	3	0	17	0	0.153	0	3	0	7	0	0.08	0	3	2	5	4	0.149	0.044	0.0364137	CG17268
CG3071	CG3071 OS=Drosophila melanogaster GN=EG:25E8.3 PE=1 SV=1	10	0	13	0	0.172	0	15	2	23	2	0.284	0.03	3	2	3	3	0.052	0.015	0.0719152	CG3071
CG3576	LD18904p OS=Drosophila melanogaster GN=schlank PE=1 SV=2	2	0	3	0	0.052	0	6	2	15	3	0.125	0.028	3	2	6	4	0.098	0.072	0.0922378	CG3576
CG3582	Splicing factor U2af 38 kDa subunit OS=Drosophila melanogaster GN=U2af38 PE=1 SV=2	0	0	0	0	0	0	5	2	8	2	0.152	0.106	3	2	4	3	0.102	0.038	0.234635	CG3582
CG3983	Guanine nucleotide-binding protein-like 3 homolog OS=Drosophila melanogaster GN=ns1 PE=1 SV=2	21	0	26	0	0.423	0	5	2	8	4	0.103	0.022	3	2	5	2	0.055	0.031	0.140116	CG3983
CG6937	CG6937 OS=Drosophila melanogaster GN=CG6937 PE=1 SV=1	6	0	8	0	0.129	0	5	2	6	2	0.107	0.025	3	2	4	3	0.076	0.048	0.021581	CG6937
CG8367	Comb gap OS=Drosophila melanogaster GN=cg PE=1 SV=1	7	0	11	0	0.116	0	8	4	19	6	0.109	0.048	3	2	4	6	0.04	0.032	0.055058	CG8367
CG10107	CG10107, isoform A OS=Drosophila melanogaster GN=CG10107-RC PE=2 SV=3	0	0	0	0	0	0	7	0	15	0	0.045	0	3	0	11	0	0.023	0	0.120951	CG10107
CG10188	CG10188, isoform A OS=Drosophila melanogaster GN=CG10188 PE=1 SV=1	0	0	0	0	0	0	4	0	4	0	0.031	0	3	0	4	0	0.023	0	0.0958548	CG10188
CG10217	CG10217, isoform A OS=Drosophila melanogaster GN=CG10217-RA PE=1 SV=2	8	0	11	0	0.165	0	3	0	3	0	0.05	0	3	0	7	0	0.053	0	0.0536963	CG10217
CG10281	General transcription factor IIF subunit 1 OS=Drosophila melanogaster GN=TfIIFalpha PE=1 SV=3	2	0	2	0	0.064	0	10	0	14	0	0.198	0	3	0	6	0	0.095	0	0.0926559	CG10281
CG10640	LD28904p OS=Drosophila melanogaster GN=Uev1A PE=2 SV=1	4	0	9	0	0.214	0	2	0	3	0	0.11	0	3	0	8	0	0.214	0	0.0175494	CG10640
CG10679	NEDD8 OS=Drosophila melanogaster GN=Nedd8 PE=1 SV=1	0	0	0	0	0	0	2	0	2	0	0.226	0	3	0	5	0	0.167	0	0.0996796	CG10679
CG10722	CG10722, isoform A OS=Drosophila melanogaster GN=nesd PE=1 SV=1	2	0	2	0	0.068	0	0	0	0	0	0	0	3	0	6	0	0.053	0	0.0996796	CG10722
CG1107	Auxillin, isoform A OS=Drosophila melanogaster GN=aux PE=2 SV=1	2	0	4	0	0.027	0	0	0	0	0	0	0	3	0	4	0	0.033	0	0.0996796	CG1107
CG11130	Probable RNA 3'-terminal phosphate cyclase-like protein OS=Drosophila melanogaster GN=Rtc1 PE=2 SV=3	3	0	3	0	0.109	0	5	0	5	0	0.161	0	3	0	20	0	0.107	0	0.015752	CG11130
CG11148	PERQ amino acid-rich with GYF domain-containing protein CG11148 OS=Drosophila melanogaster GN=CG11148 PE=1 SV=2	16	0	21	0	0.148	0	8	0	16	0	0.062	0	3	0	4	0	0.021	0	0.0702903	CG11148
CG11254	Protein maelstrom OS=Drosophila melanogaster GN=mael PE=1 SV=1	3	0	3	0	0.059	0	9	0	14	0	0.248	0	3	0	4	0	0.096	0	0.0648059	CG11254
CG1135	GH01794p OS=Drosophila melanogaster GN=Rcd5 PE=1 SV=1	5	0	6	0	0.137	0	7	3	11	4	0.125	0.042	3	0	6	0	0.057	0	0.030051	CG1135
CG11412	Isoform C of N-alpha-acetyltransferase 30, NatC catalytic subunit OS=Drosophila melanogaster GN=CG11412	9	0	11	0	0.266	0	5	2	14	8	0.122	0.04	3	0	4	0	0.109	0	0.0454474	CG11412
CG11785	Transmembrane emp24 domain-containing protein bai OS=Drosophila melanogaster GN=bai PE=2 SV=1	6	0	7	0	0.282	0	6	2	6	2	0.204	0.049	3	0	3	0	0.146	0	0.0142911	CG11785
CG11799	LD11294p OS=Drosophila melanogaster GN=fd68A PE=2 SV=2	0	0	0	0	0	0	9	0	13	0	0.185	0	3	0	3	0	0.051	0	0.134852	CG11799
CG11879	Yemanuclein-alpha OS=Drosophila melanogaster GN=yemalpha PE=1 SV=1	5	0	5	0	0.086	0	3	0	6	0	0.035	0	3	0	7	0	0.057	0	0.015752	CG11879
CG11985	Probable splicing factor 3B subunit 5 OS=Drosophila melanogaster GN=CG11985 PE=1 SV=1	3	0	4	0	0.341	0	2	0	3	0	0.2	0	3	0	10	0	0.235	0	0.00763404	CG11985
CG12050	CG12050 OS=Drosophila melanogaster GN=CG12050-RB PE=2 SV=2	6	0	7	0	0.105	0	8	0	13	0	0.087	0	3	0	5	0	0.03	0	0.0299489	CG12050
CG12084	Protein zer-1 homolog OS=Drosophila melanogaster GN=CG12084 PE=2 SV=2	2	0	2	0	0.035	0	5	0	11	0	0.092	0	3	0	8	0	0.032	0	0.0317071	CG12084
CG12096	CG12096 OS=Drosophila melanogaster GN=CG12096 PE=1 SV=3	4	0	9	0	0.136	0	7	0	12	0	0.148	0	3	0	9	0	0.055	0	0.0301908	CG12096
CG12264	Probable cysteine desulfurase, mitochondrial OS=Drosophila melanogaster GN=CG12264 PE=2 SV=1	6	0	8	0	0.154	0	7	0	12	0	0.175	0	3	0	5	0	0.089	0	0.0236069	CG12264
CG12775	RE62581p OS=Drosophila melanogaster GN=RpL21 PE=2 SV=1	13	3	48	5	0.358	0.101	9	2	13	7	0.384	0.088	3	0	3	0	0.088	0	0.0697084	CG12775
CG13366	CG13366, isoform B OS=Drosophila melanogaster GN=CG13366 PE=4 SV=1	3	0	3	0	0.041	0	2	0	2	0	0.016	0	3	0	7	0	0.027	0	0.00763404	CG13366
CG1345	GH12731p OS=Drosophila melanogaster GN=Gfat2 PE=2 SV=1	2	0	2	0	0.072	0	2	0	2	0	0.032	0	3	0	5	0	0.044	0	0.00990197	CG1345
CG1403	Septin-1 OS=Drosophila melanogaster GN=Sep1 PE=1 SV=1	13	0	17	0	0.432	0	8	0	10	0	0.307	0	3	0	7	0	0.114	0	0.0546382	CG1403
CG14217	LD06119p OS=Drosophila melanogaster GN=Tao-1 PE=1 SV=1	2	0	2	0	0.039	0	4	0	5	0	0.041	0	3	0	6	0	0.028	0	0.0175494	CG14217
CG1455	Serine/threonine-protein phosphatase 2B catalytic subunit 1 OS=Drosophila melanogaster GN=CanA1 PE=1 SV=2	0	0	0	0	0	0	5	0	5	0	0.037	0	3	0	6	0	0.042	0	0.103941	CG1455
CG14788	Large subunit GTPase 1 homolog OS=Drosophila melanogaster GN=ns3 PE=1 SV=1	5	0	6	0	0.104	0	9	0	18	0	0.145	0	3	0	6	0	0.073	0	0.0423754	CG14788
CG14941	Polycomb protein esc OS=Drosophila melanogaster GN=esc PE=1 SV=1	7	0	10	0	0.266	0	9	2	14	5	0.252	0.049	3	0	12	0	0.104	0	0.0350987	CG14941
CG1584	Origin recognition complex subunit 6 OS=Drosophila melanogaster GN=Orc6 PE=2 SV=2	5	0	5	0	0.35	0	3	0	3	0	0.117	0	3	0	9	0	0.148	0	0.015752	CG1584
CG1591	LD45860p OS=Drosophila melanogaster GN=REG PE=1 SV=1	5	0	5	0	0.314	0	2	0	2	0	0.09	0	3	0	3	0	0.159	0	0.0317071	CG1591
CG1598	ATPase ASNA1 homolog OS=Drosophila melanogaster GN=CG1598 PE=1 SV=1	8	0	10	0	0.295	0	2	0	2	0	0.068	0	3	0	6	0	0.116	0	0.0723314	CG1598
CG1637	CG1637, isoform C OS=Drosophila melanogaster GN=CG1637 PE=1 SV=1	2	0	3	0	0.1	0	2	0	2	0	0.036	0	3	0	12	0	0.036	0	0.00990197	CG1637
CG1677	CG1677 OS=Drosophila melanogaster GN=CG1677-RA PE=1 SV=2	0	0	0	0	0	0	2	0	10	0	0.047	0	3	0	4	0	0.047	0	0.0996796	CG1677
CG16972	CG16972 OS=Drosophila melanogaster GN=CG16972 PE=1 SV=1	9	0	11	0	0.099	0	4	3	6	3	0.018	0.012	3	0	8	0	0.027	0	0.0649789	CG16972
CG16975	Polycomb protein Sfmbt OS=Drosophila melanogaster GN=Sfmbt PE=1 SV=2	3	0	6	0	0.069	0	5	0	8	0	0.056	0	3	0	4	0	0.047	0	0.015752	CG16975
CG16982	RING-box protein 1A OS=Drosophila melanogaster GN=Roc1a PE=1 SV=1	0	0	0	0	0	0	0	0	0	0	0	0	3	0	3	0	0.13	0	0.211325	CG16982
CG17149	Possible lysine-specific histone demethylase 1 OS=Drosophila melanogaster GN=Su(var)3-3 PE=1 SV=1	3	0	5	0	0.088	0	15	0	21	0	0.174	0	3	0	6	0	0.07	0	0.111111	CG17149
CG17332	Isoform B of V-type proton ATPase subunit H OS=Drosophila melanogaster GN=VhaSFD	0	0	0	0	0	0	2	0	2	0	0.037	0	3	0	4	0	0.061	0	0.0996796	CG17332
CG17484	Adherens junction protein p120, isoform B OS=Drosophila melanogaster GN=p120ctn PE=4 SV=1	8	0	9	0	0.175	0	5	2	8	2	0.08	0.025	3	0	4	0	0.051	0	0.0333748	CG17484
CG17494	CG17494, isoform B (Fragment) OS=Drosophila melanogaster GN=CG17494-RB PE=1 SV=1	4	0	4	0	0.056	0	8	3	8	3	0.093	0.023	3	0	5	0	0.035	0	0.0522301	CG17494
CG17520	Casein kinase II subunit alpha OS=Drosophila melanogaster GN=CkIIalpha PE=1 SV=2	17	0	26	0	0.512	0	25	0	43	0	0.369	0	3	0	13	0	0.107	0	0.0724164	CG17520
CG17683	Isoform B of Probable cytosolic Fe-S cluster assembly factor CG17683 OS=Drosophila melanogaster GN=CG17683	2	0	2	0	0.072	0	7	0	9	0	0.153	0	3	0	6	0	0.081	0	0.0600587	CG17683
CG17743	Polycomb protein PHO OS=Drosophila melanogaster GN=pho PE=1 SV=2	5	0	8	0	0.144	0	0	0	0	0	0	0	3	0	4	0	0.071	0	0.103941	CG17743
CG1799	Inosine-5'-monophosphate dehydrogenase OS=Drosophila melanogaster GN=ras PE=1 SV=1	0	0	0	0	0	0	6	0	7	0	0.123	0	3	0	7	0	0.11	0	0.112702	CG1799
CG18780	Mediator of RNA polymerase II transcription subunit 20 OS=Drosophila melanogaster GN=MED20 PE=1 SV=2	0	0	0	0	0	0	2	0	2	0	0.087	0	3	0	4	0	0.103	0	0.0996796	CG18780
CG1898	FI04779p OS=Drosophila melanogaster GN=HBS1 PE=1 SV=2	0	0	0	0	0	0	4	0	5	0	0.049	0	3	0	8	0	0.04	0	0.0958548	CG1898
CG1924	CG1924 OS=Drosophila melanogaster GN=CG1924 PE=2 SV=2	0	0	0	0	0	0	0	0	0	0	0	0	3	0	3	0	0.049	0	0.211325	CG1924
CG2063	CG2063 OS=Drosophila melanogaster GN=CG2063 PE=1 SV=1	5	0	6	0	0.218	0	4	0	5	0	0.163	0	3	0	6	0	0.114	0	0.0101021	CG2063
CG2087	Eukaryotic translation initiation factor 2-alpha kinase OS=Drosophila melanogaster GN=PEK PE=1 SV=2	0	0	0	0	0	0	0	0	0	0	0	0	3	0	4	0	0.038	0	0.211325	CG2087
CG2368	LD33470p OS=Drosophila melanogaster GN=psq PE=2 SV=1	12	0	14	0	0.154	0	4	0	4	0	0.081	0	3	0	3	0	0.053	0	0.0780902	CG2368
CG2503	Antimeros OS=Drosophila melanogaster GN=atms PE=2 SV=1	5	2	7	2	0.158	0.043	4	3	7	6	0.08	0.048	3	0	6	0	0.08	0	0.0510341	CG2503
CG2670	Transcription initiation factor TFIID subunit 7 OS=Drosophila melanogaster GN=Taf7 PE=1 SV=1	6	0	8	0	0.161	0	4	4	8	4	0.1	0.038	3	0	4	0	0.094	0	0.0723293	CG2670
CG2875	CG2875, isoform A OS=Drosophila melanogaster GN=CG2875 PE=2 SV=1	10	0	10	0	0.282	0	13	0	13	0	0.268	0	3	0	3	0	0.056	0	0.0498468	CG2875
CG2910	BcDNA.GH11110 OS=Drosophila melanogaster GN=nito PE=1 SV=1	5	0	7	0	0.079	0	8	2	11	2	0.096	0.024	3	0	6	0	0.04	0	0.0333748	CG2910
CG3051	EG:132E8.2 protein OS=Drosophila melanogaster GN=SNF1A PE=1 SV=1	3	0	3	0	0.053	0	8	0	12	0	0.151	0	3	0	7	0	0.082	0	0.0536963	CG3051
CG32016	CG32016, isoform A OS=Drosophila melanogaster GN=CG32016 PE=1 SV=2	13	0	15	0	0.178	0	6	0	7	0	0.072	0	3	0	5	0	0.03	0	0.0658646	CG32016
CG32135	CG32135 OS=Drosophila melanogaster GN=CG32135 PE=2 SV=1	0	0	0	0	0	0	0	0	0	0	0	0	3	0	10	0	0.023	0	0.211325	CG32135
CG32344	CG32344 OS=Drosophila melanogaster GN=CG6994 PE=2 SV=1	6	0	7	0	0.093	0	5	0	7	0	0.058	0	3	0	6	0	0.033	0	0.0169541	CG32344
CG32479	CG32479 OS=Drosophila melanogaster GN=CG13903 PE=1 SV=2	5	0	6	0	0.054	0	9	0	15	0	0.05	0	3	0	7	0	0.026	0	0.0423754	CG32479
CG32505	Serine/threonine-protein phosphatase 4 catalytic subunit OS=Drosophila melanogaster GN=Pp4-19C PE=2 SV=1	4	0	6	0	0.101	0	5	0	8	0	0.205	0	3	0	7	0	0.049	0	0.0101021	CG32505
CG3265	Eb1, isoform E OS=Drosophila melanogaster GN=Eb1 PE=2 SV=1	6	0	7	0	0.293	0	13	4	16	5	0.29	0.093	3	0	8	0	0.134	0	0.0846217	CG3265
CG32708	CG32708 OS=Drosophila melanogaster GN=CG32708 PE=2 SV=1	6	0	12	0	0.272	0	2	0	2	0	0.084	0	3	0	4	0	0.13	0	0.0463676	CG32708
CG33105	LP01981p OS=Drosophila melanogaster GN=p24-2 PE=2 SV=1	5	0	10	0	0.16	0	6	4	9	4	0.238	0.057	3	0	9	0	0.131	0	0.0580067	CG33105
CG33162	GM04779p OS=Drosophila melanogaster GN=SrpRbeta PE=2 SV=2	7	0	10	0	0.291	0	9	0	12	0	0.291	0	3	0	7	0	0.135	0	0.034783	CG33162
CG33217	CG33217 OS=Drosophila melanogaster GN=CG33217 PE=2 SV=1	12	0	16	0	0.185	0	7	0	10	0	0.119	0	3	0	4	0	0.049	0	0.0531555	CG33217
CG34174	CG34174 OS=Drosophila melanogaster GN=CG34174 PE=2 SV=1	0	0	0	0	0	0	0	0	0	0	0	0	3	0	4	0	0.106	0	0.211325	CG34174
CG3421	FI04035p OS=Drosophila melanogaster GN=RhoGAP93B PE=2 SV=2	2	0	2	0	0.029	0	8	0	10	0	0.086	0	3	0	4	0	0.028	0	0.0723314	CG3421
CG3460	EG:152A3.1 protein OS=Drosophila melanogaster GN=Nmd3 PE=1 SV=1	8	0	16	0	0.165	0	17	0	31	0	0.29	0	3	0	7	0	0.067	0	0.075172	CG3460
CG3481	Alcohol dehydrogenase OS=Drosophila melanogaster GN=Adh PE=1 SV=2	8	2	10	2	0.379	0.09	8	0	14	0	0.398	0	3	0	4	0	0.191	0	0.0305767	CG3481
CG3654	Jarid2 OS=Drosophila melanogaster GN=Jarid2 PE=1 SV=3	0	0	0	0	0	0	3	2	8	11	0.013	0.01	3	0	4	0	0.017	0	0.168947	CG3654
CG3695	Mediator of RNA polymerase II transcription subunit 23 OS=Drosophila melanogaster GN=MED23 PE=1 SV=1	0	0	0	0	0	0	3	2	3	2	0.028	0.013	3	0	5	0	0.018	0	0.168947	CG3695
CG3704	CG3704 OS=Drosophila melanogaster GN=EG:BACR7A4.17 PE=1 SV=1	5	0	7	0	0.209	0	12	0	13	0	0.301	0	3	0	36	0	0.086	0	0.0672577	CG3704
CG3751	40S ribosomal protein S24 OS=Drosophila melanogaster GN=RpS24 PE=2 SV=1	11	0	29	0	0.45	0	22	0	41	0	0.496	0	3	0	12	0	0.229	0	0.0806007	CG3751
CG3792	Mannose-P-dolichol utilization defect 1 protein homolog OS=Drosophila melanogaster GN=CG3792 PE=1 SV=2	0	0	0	0	0	0	0	0	0	0	0	0	3	0	4	0	0.063	0	0.211325	CG3792
CG3800	CCHC-type zinc finger protein CG3800 OS=Drosophila melanogaster GN=CG3800 PE=1 SV=1	5	2	9	2	0.315	0.224	3	0	4	0	0.242	0	3	0	6	0	0.261	0	0.0167359	CG3800
CG3806	EIF2B-epsilon protein OS=Drosophila melanogaster GN=eIF2B-epsilon PE=2 SV=1	5	0	5	0	0.07	0	11	2	25	2	0.161	0.016	3	0	3	0	0.054	0	0.0670412	CG3806
CG3949	NHP2-like protein 1 homolog OS=Drosophila melanogaster GN=hoip PE=1 SV=1	8	2	12	11	0.48	0.189	11	3	17	3	0.543	0.268	3	0	6	0	0.189	0	0.0614336	CG3949
CG4006	Isoform A of RAC serine/threonine-protein kinase OS=Drosophila melanogaster GN=Akt1	4	0	4	0	0.085	0	4	2	7	3	0.098	0.019	3	0	4	0	0.045	0	0.0142979	CG4006
CG4016	RE58623p OS=Drosophila melanogaster GN=Spt-I PE=2 SV=1	0	0	0	0	0	0	0	0	0	0	0	0	3	0	5	0	0.062	0	0.211325	CG4016
CG4049	CG4049 OS=Drosophila melanogaster GN=CG4049 PE=1 SV=3	0	0	0	0	0	0	5	0	8	0	0.04	0	3	0	9	0	0.011	0	0.103941	CG4049
CG4051	Egalitarian OS=Drosophila melanogaster GN=egl PE=2 SV=4	15	0	18	0	0.164	0	13	0	20	0	0.173	0	3	0	4	0	0.047	0	0.0542221	CG4051
CG4107	GH11602p OS=Drosophila melanogaster GN=Pcaf PE=1 SV=1	7	0	7	0	0.117	0	13	4	23	17	0.169	0.037	3	0	3	0	0.048	0	0.074115	CG4107
CG41503	CG41503 (Fragment) OS=Drosophila melanogaster GN=CG41503 PE=4 SV=2	9	0	44	0	0.211	0	6	2	13	3	0.151	0.051	3	0	4	0	0.077	0	0.038198	CG41503
CG4164	CG4164 OS=Drosophila melanogaster GN=CG4164 PE=1 SV=1	3	0	3	0	0.102	0	3	0	5	0	0.124	0	3	0	5	0	0.093	0	#DIV/0!	CG4164
CG4169	AT02348p OS=Drosophila melanogaster GN=CG4169 PE=2 SV=1	12	0	12	0	0.37	0	19	3	30	6	0.368	0.068	3	0	6	0	0.084	0	0.0750096	CG4169
CG4184	Mediator of RNA polymerase II transcription subunit 15 OS=Drosophila melanogaster GN=MED15 PE=2 SV=1	3	0	3	0	0.077	0	5	0	6	0	0.107	0	3	0	4	0	0.02	0	0.015752	CG4184
CG42684	Probable Ras GTPase-activating protein OS=Drosophila melanogaster GN=CG42684 PE=1 SV=3	4	0	5	0	0.035	0	10	0	15	0	0.078	0	3	0	4	0	0.027	0	0.0610619	CG42684
CG4274	FI02843p OS=Drosophila melanogaster GN=fzy PE=1 SV=1	5	0	5	0	0.129	0	5	0	6	0	0.103	0	3	0	4	0	0.07	0	0.0114301	CG4274
CG44255	CG31120, isoform B OS=Drosophila melanogaster GN=CG13644 PE=1 SV=2	3	0	3	0	0.08	0	7	0	7	0	0.127	0	3	0	6	0	0.073	0	0.0415253	CG44255
CG4500	Long-chain-fatty-acid--CoA ligase bubblegum-like OS=Drosophila melanogaster GN=CG4500 PE=2 SV=1	9	0	13	0	0.172	0	2	0	2	0	0.04	0	3	0	7	0	0.06	0	0.0831561	CG4500
CG4602	LD29830p OS=Drosophila melanogaster GN=Srp54 PE=1 SV=1	6	0	7	0	0.17	0	8	0	11	0	0.23	0	3	0	4	0	0.037	0	0.0299489	CG4602
CG4621	Vacuolar protein sorting-associated protein 72 homolog OS=Drosophila melanogaster GN=YL-1 PE=1 SV=1	5	0	5	0	0.197	0	5	0	8	0	0.154	0	3	0	6	0	0.097	0	0.0114301	CG4621
CG4673	Isoform B of Nuclear protein localization protein 4 homolog OS=Drosophila melanogaster GN=CG4673	3	0	3	0	0.058	0	2	0	2	0	0.034	0	3	0	12	0	0.048	0	0.00763404	CG4673
CG4771	CG4771 OS=Drosophila melanogaster GN=vret PE=1 SV=1	0	0	0	0	0	0	5	0	5	0	0.071	0	3	0	5	0	0.054	0	0.103941	CG4771
CG4921	Rab-protein 4, isoform A OS=Drosophila melanogaster GN=Rab4 PE=2 SV=1	0	0	0	0	0	0	5	0	7	0	0.239	0	3	0	4	0	0.178	0	0.103941	CG4921
CG4933	Probable tRNA threonylcarbamoyladenosine biosynthesis protein CG4933 OS=Drosophila melanogaster GN=CG4933 PE=2 SV=1	0	0	0	0	0	0	4	0	5	0	0.121	0	3	0	5	0	0.118	0	0.0958548	CG4933
CG5018	CG5018 OS=Drosophila melanogaster GN=CG5018-RA PE=2 SV=1	6	0	6	0	0.105	0	13	0	23	0	0.227	0	3	0	4	0	0.055	0	0.0658646	CG5018
CG5058	Isoform N of Protein grainyhead OS=Drosophila melanogaster GN=grh	5	0	5	0	0.056	0	0	0	0	0	0	0	3	0	4	0	0.034	0	0.103941	CG5058
CG5167	CG5167 OS=Drosophila melanogaster GN=CG5167 PE=2 SV=1	0	0	0	0	0	0	10	0	19	0	0.271	0	3	0	6	0	0.102	0	0.140549	CG5167
CG5174	CG5174, isoform L OS=Drosophila melanogaster GN=CG5174 PE=4 SV=1	7	0	10	0	0.344	0	6	0	8	0	0.282	0	3	0	5	0	0.176	0	0.0236069	CG5174
CG5206	Bonus, isoform B OS=Drosophila melanogaster GN=bon PE=2 SV=1	2	0	3	0	0.034	0	4	2	4	2	0.049	0.02	3	0	5	0	0.039	0	0.0292201	CG5206
CG5208	Protein associated with topo II related-1 OS=Drosophila melanogaster GN=Patr-1 PE=1 SV=1	24	0	35	0	0.292	0	11	0	12	0	0.135	0	3	0	8	0	0.03	0	0.0871516	CG5208
CG5216	Sir2 OS=Drosophila melanogaster GN=Sir2 PE=1 SV=1	0	0	0	0	0	0	2	0	2	0	0.033	0	3	0	12	0	0.049	0	0.0996796	CG5216
CG5358	Probable histone-arginine methyltransferase CARMER OS=Drosophila melanogaster GN=Art4 PE=1 SV=1	13	0	25	0	0.417	0	3	0	4	0	0.092	0	3	0	6	0	0.066	0	0.0989097	CG5358
CG5409	Actin-like protein 53D OS=Drosophila melanogaster GN=Arp53D PE=2 SV=2	0	0	0	0	0	0	0	0	0	0	0	0	3	0	10	0	0.024	0	0.211325	CG5409
CG5474	BcDNA.LD10457 OS=Drosophila melanogaster GN=SsRbeta PE=1 SV=2	6	0	11	0	0.353	0	5	0	11	0	0.195	0	3	0	6	0	0.068	0	0.0169541	CG5474
CG5504	Protein tumorous imaginal discs, mitochondrial OS=Drosophila melanogaster GN=l(2)tid PE=1 SV=2	0	0	0	0	0	0	6	0	10	0	0.144	0	3	0	7	0	0.133	0	0.112702	CG5504
CG5595	E3 ubiquitin-protein ligase RING1 OS=Drosophila melanogaster GN=Sce PE=1 SV=1	5	0	8	0	0.126	0	7	0	8	0	0.145	0	3	0	3	0	0.076	0	0.0247068	CG5595
CG5640	LD02225p OS=Drosophila melanogaster GN=Utx PE=1 SV=3	12	0	14	0	0.173	0	12	0	18	0	0.099	0	3	0	4	0	0.04	0	0.047733	CG5640
CG5664	CG5664 OS=Drosophila melanogaster GN=CG5664 PE=2 SV=2	2	0	2	0	0.032	0	3	0	4	0	0.052	0	3	0	6	0	0.027	0	0.00763404	CG5664
CG5694	CG5694, isoform A OS=Drosophila melanogaster GN=CG5694 PE=1 SV=2	2	0	3	0	0.071	0	9	0	12	0	0.138	0	3	0	10	0	0.064	0	0.0831561	CG5694
CG5814	G2/mitotic-specific cyclin-B3 OS=Drosophila melanogaster GN=CycB3 PE=1 SV=1	3	0	3	0	0.092	0	7	0	9	0	0.115	0	3	0	6	0	0.064	0	0.0415253	CG5814
CG5885	CG5885 OS=Drosophila melanogaster GN=BEST:CK01296 PE=1 SV=1	0	0	0	0	0	0	5	0	5	0	0.1	0	3	0	4	0	0.1	0	0.103941	CG5885
CG5923	DNA polymerase alpha subunit B OS=Drosophila melanogaster GN=DNApol-alpha73 PE=1 SV=2	10	0	13	0	0.204	0	10	0	16	0	0.19	0	3	0	9	0	0.067	0	0.0407342	CG5923
CG5970	Protein CLP1 homolog OS=Drosophila melanogaster GN=cbc PE=2 SV=1	0	0	0	0	0	0	0	0	0	0	0	0	3	0	3	0	0.095	0	0.211325	CG5970
CG6095	Exo84, isoform A OS=Drosophila melanogaster GN=exo84 PE=1 SV=1	0	0	0	0	0	0	9	2	21	3	0.11	0.036	3	0	4	0	0.055	0	0.167097	CG6095
CG6133	tRNA (cytosine(34)-C(5))-methyltransferase OS=Drosophila melanogaster GN=CG6133 PE=2 SV=1	0	0	0	0	0	0	2	0	2	0	0.021	0	3	0	3	0	0.042	0	0.0996796	CG6133
CG6206	CG6206, isoform B OS=Drosophila melanogaster GN=CG6206 PE=1 SV=1	4	0	4	0	0.046	0	0	0	0	0	0	0	3	0	6	0	0.023	0	0.0958548	CG6206
CG6210	Isoform B of Protein wntless OS=Drosophila melanogaster GN=wls	0	0	0	0	0	0	11	3	25	5	0.135	0.052	3	0	4	0	0.069	0	0.191008	CG6210
CG6214	Multidrug-Resistance like protein 1, isoform Q OS=Drosophila melanogaster GN=MRP PE=2 SV=1	0	0	0	0	0	0	2	0	2	0	0.013	0	3	0	4	0	0.028	0	0.0996796	CG6214
CG6230	CG6230 OS=Drosophila melanogaster GN=CG6230-RA PE=2 SV=1	2	0	2	0	0.029	0	13	0	17	0	0.109	0	3	0	4	0	0.027	0	0.114836	CG6230
CG6538	General transcription factor IIF subunit 2 OS=Drosophila melanogaster GN=TfIIFbeta PE=2 SV=2	4	0	4	0	0.206	0	3	0	4	0	0.152	0	3	0	6	0	0.134	0	0.00492623	CG6538
CG6668	Atlastin OS=Drosophila melanogaster GN=atl PE=1 SV=1	4	0	4	0	0.115	0	7	0	8	0	0.137	0	3	0	9	0	0.067	0	0.0301908	CG6668
CG6673	CG6673, isoform B OS=Drosophila melanogaster GN=CG6673 PE=1 SV=2	9	0	9	0	0.432	0	8	2	14	2	0.18	0.064	3	0	4	0	0.112	0	0.0351055	CG6673
CG6767	Ribose-phosphate pyrophosphokinase OS=Drosophila melanogaster GN=CG6767 PE=2 SV=3	3	0	3	0	0.088	0	8	0	12	0	0.229	0	3	0	6	0	0.126	0	0.0536963	CG6767
CG6840	DNA-directed RNA polymerase II subunit RPB11 OS=Drosophila melanogaster GN=Rpb11 PE=1 SV=1	2	0	2	0	0.128	0	2	0	2	0	0.179	0	3	0	5	0	0.274	0	0.00990197	CG6840
CG7074	WD repeat-containing protein mio OS=Drosophila melanogaster GN=mio PE=2 SV=2	2	0	2	0	0.046	0	10	2	12	2	0.101	0.03	3	0	4	0	0.04	0	0.111247	CG7074
CG7158	CG7158 OS=Drosophila melanogaster GN=CG7158 PE=1 SV=1	0	0	0	0	0	0	6	0	9	0	0.059	0	3	0	4	0	0.025	0	0.112702	CG7158
CG7235	60 kDa heat shock protein homolog 2, mitochondrial OS=Drosophila melanogaster GN=Hsp60C PE=2 SV=2	3	0	3	0	0.052	0	5	0	8	0	0.073	0	3	0	5	0	0.059	0	0.015752	CG7235
CG7239	CG7239 OS=Drosophila melanogaster GN=CG7239 PE=1 SV=1	0	0	0	0	0	0	6	0	8	0	0.131	0	3	0	3	0	0.078	0	0.112702	CG7239
CG7364	GH02822p OS=Drosophila melanogaster GN=TM9SF4 PE=1 SV=1	3	0	3	0	0.078	0	3	0	3	0	0.052	0	3	0	4	0	0.052	0	#DIV/0!	CG7364
CG7379	CG7379 OS=Drosophila melanogaster GN=CG7379 PE=1 SV=1	6	0	7	0	0.118	0	3	0	5	0	0.074	0	3	0	6	0	0.072	0	0.0285955	CG7379
CG7492	CG7492 OS=Drosophila melanogaster GN=CG7492 PE=1 SV=1	3	0	3	0	0.07	0	5	0	7	0	0.087	0	3	0	7	0	0.105	0	0.015752	CG7492
CG7518	CG7518, isoform C OS=Drosophila melanogaster GN=CG7518 PE=4 SV=1	2	0	2	0	0.013	0	3	0	3	0	0.016	0	3	0	10	0	0.019	0	0.00763404	CG7518
CG7601	Dehydrogenase/reductase SDR family protein 7-like OS=Drosophila melanogaster GN=CG7601 PE=2 SV=1	2	0	2	0	0.098	0	9	0	20	0	0.245	0	3	0	5	0	0.086	0	0.0831561	CG7601
CG7838	Bub1-related kinase OS=Drosophila melanogaster GN=BubR1 PE=1 SV=1	8	0	12	0	0.084	0	6	3	8	3	0.046	0.055	3	0	5	0	0.024	0	0.0324111	CG7838
CG7946	CG7946 OS=Drosophila melanogaster GN=CG7946 PE=1 SV=1	2	0	2	0	0.124	0	4	0	4	0	0.126	0	3	0	4	0	0.074	0	0.0175494	CG7946
CG7989	U3 small nucleolar RNA-associated protein 18 homolog OS=Drosophila melanogaster GN=wcd PE=1 SV=1	10	0	12	0	0.215	0	6	0	8	0	0.105	0	3	0	5	0	0.042	0	0.0445099	CG7989
CG8014	Receptor mediated endocytosis 8 OS=Drosophila melanogaster GN=Rme-8 PE=4 SV=1	4	0	7	0	0.039	0	9	0	13	0	0.044	0	3	0	5	0	0.012	0	0.0513823	CG8014
CG8057	Alicorn OS=Drosophila melanogaster GN=alc PE=1 SV=1	4	0	6	0	0.173	0	7	0	9	0	0.129	0	3	0	8	0	0.079	0	0.0301908	CG8057
CG8068	RE73180p OS=Drosophila melanogaster GN=Su(var)2-10 PE=2 SV=1	5	0	5	0	0.13	0	9	0	13	0	0.178	0	3	0	7	0	0.092	0	0.0423754	CG8068
CG8153	Isoform 3 of DNA repair protein complementing XP-C cells homolog OS=Drosophila melanogaster GN=mus210	0	0	0	0	0	0	2	0	6	0	0.02	0	3	0	4	0	0.029	0	0.0996796	CG8153
CG8208	LD22928p OS=Drosophila melanogaster GN=MBD-like PE=2 SV=2	3	0	3	0	0.118	0	5	2	7	3	0.221	0.035	3	0	4	0	0.162	0	0.0167359	CG8208
CG8230	Dymeclin OS=Drosophila melanogaster GN=CG8230 PE=1 SV=1	2	0	3	0	0.047	0	6	0	6	0	0.094	0	3	0	5	0	0.053	0	0.0463676	CG8230
CG8241	FI05376p OS=Drosophila melanogaster GN=pea PE=2 SV=1	2	0	2	0	0.022	0	14	2	19	2	0.117	0.018	3	0	4	0	0.025	0	0.138417	CG8241
CG8266	Sec31, isoform A OS=Drosophila melanogaster GN=sec31 PE=4 SV=1	9	0	12	0	0.106	0	5	0	7	0	0.038	0	3	0	3	0	0.029	0	0.0423754	CG8266
CG8449	CG8449 OS=Drosophila melanogaster GN=CG8449 PE=1 SV=1	3	0	3	0	0.069	0	9	0	11	0	0.133	0	3	0	5	0	0.047	0	0.0648059	CG8449
CG8495	40S ribosomal protein S29 OS=Drosophila melanogaster GN=RpS29 PE=3 SV=1	0	0	0	0	0	0	7	2	7	2	0.5	0.161	3	0	7	0	0.286	0	0.159232	CG8495
CG8542	Heat shock 70 kDa protein cognate 5 OS=Drosophila melanogaster GN=Hsc70-5 PE=1 SV=2	10	0	16	0	0.232	0	6	0	9	0	0.099	0	3	0	3	0	0.038	0	0.0445099	CG8542
CG8605	RINT1-like protein OS=Drosophila melanogaster GN=CG8605 PE=1 SV=2	9	0	11	0	0.2	0	25	0	37	0	0.285	0	3	0	7	0	0.062	0	0.100554	CG8605
CG8610	Cdc27 OS=Drosophila melanogaster GN=Cdc27 PE=1 SV=1	5	0	5	0	0.09	0	4	0	9	0	0.061	0	3	0	5	0	0.028	0	0.0101021	CG8610
CG8615	60S ribosomal protein L18 OS=Drosophila melanogaster GN=RpL18 PE=1 SV=1	12	5	100	127	0.346	0.223	4	0	7	0	0.186	0	3	0	5	0	0.08	0	0.12308	CG8615
CG8637	Isoform A of Serine/threonine-protein kinase tricorner OS=Drosophila melanogaster GN=trc	4	0	5	0	0.083	0	2	0	2	0	0.05	0	3	0	5	0	0.044	0	0.0175494	CG8637
CG8709	CG8709, isoform A OS=Drosophila melanogaster GN=Lpin PE=1 SV=1	0	0	0	0	0	0	0	0	0	0	0	0	3	0	3	0	0.028	0	0.211325	CG8709
CG8710	Coilin, isoform D OS=Drosophila melanogaster GN=coil PE=2 SV=1	6	0	6	0	0.115	0	8	0	10	0	0.161	0	3	0	6	0	0.039	0	0.0299489	CG8710
CG8730	Drosha OS=Drosophila melanogaster GN=drosha PE=1 SV=1	0	0	0	0	0	0	0	0	0	0	0	0	3	0	4	0	0.023	0	0.211325	CG8730
CG8759	Nascent polypeptide-associated complex subunit alpha OS=Drosophila melanogaster GN=Nacalpha PE=1 SV=2	3	0	4	0	0.221	0	3	5	6	7	0.189	0.249	3	0	5	0	0.18	0	0.253817	CG8759
CG8801	Probable nucleolar GTP-binding protein 1 OS=Drosophila melanogaster GN=CG8801 PE=2 SV=1	14	0	16	0	0.224	0	11	2	12	3	0.118	0.032	3	0	4	0	0.043	0	0.0565924	CG8801
CG8828	Dim gamma-tubulin 5 OS=Drosophila melanogaster GN=dgt5 PE=2 SV=1	3	0	3	0	0.058	0	8	0	13	0	0.158	0	3	0	8	0	0.051	0	0.0536963	CG8828
CG8841	CG8841, isoform A OS=Drosophila melanogaster GN=CG8841 PE=1 SV=1	0	0	0	0	0	0	12	0	17	0	0.232	0	3	0	4	0	0.051	0	0.14993	CG8841
CG8954	LD36341p OS=Drosophila melanogaster GN=Smg5 PE=2 SV=1	2	0	3	0	0.012	0	3	0	5	0	0.023	0	3	0	4	0	0.045	0	0.00763404	CG8954
CG8975	Ribonucleoside-diphosphate reductase subunit M2 OS=Drosophila melanogaster GN=RnrS PE=1 SV=2	3	0	4	0	0.092	0	5	2	5	2	0.135	0.043	3	0	4	0	0.033	0	0.0167359	CG8975
CG8996	Walrus, isoform A OS=Drosophila melanogaster GN=wal PE=1 SV=1	5	0	12	0	0.285	0	5	0	7	0	0.161	0	3	0	3	0	0.1	0	0.0114301	CG8996
CG9010	Glyceraldehyde-3-phosphate dehydrogenase OS=Drosophila melanogaster GN=CG9010 PE=2 SV=1	2	0	4	0	0.044	0	0	2	0	2	0	0.035	3	0	6	0	0.064	0	0.210198	CG9010
CG9031	Icarus OS=Drosophila melanogaster GN=ics PE=1 SV=2	11	0	15	0	0.463	0	5	0	8	0	0.226	0	3	0	4	0	0.085	0	0.059448	CG9031
CG9063	Protein RIC1 homolog OS=Drosophila melanogaster GN=CG9063 PE=1 SV=1	0	0	0	0	0	0	9	2	14	2	0.088	0.008	3	0	5	0	0.027	0	0.167097	CG9063
CG9188	Septin interacting protein 2, isoform A OS=Drosophila melanogaster GN=sip2 PE=1 SV=2	3	0	3	0	0.109	0	2	0	3	0	0.043	0	3	0	5	0	0.058	0	0.00763404	CG9188
CG9203	CG9203 OS=Drosophila melanogaster GN=CG9203 PE=1 SV=1	7	0	12	0	0.171	0	9	0	14	0	0.097	0	3	0	8	0	0.041	0	0.034783	CG9203
CG9285	Dipeptidase B, isoform A OS=Drosophila melanogaster GN=Dip-B PE=1 SV=2	4	0	4	0	0.102	0	4	2	5	4	0.093	0.033	3	0	3	0	0.091	0	0.0142979	CG9285
CG9418	CG9418 OS=Drosophila melanogaster GN=BEST:LD07122 PE=1 SV=1	9	0	13	0	0.21	0	3	0	5	0	0.117	0	3	0	5	0	0.061	0	0.0648059	CG9418
CG9633	Replication protein A 70 kDa DNA-binding subunit OS=Drosophila melanogaster GN=RpA-70 PE=1 SV=1	3	0	4	0	0.081	0	4	0	4	0	0.075	0	3	0	4	0	0.058	0	0.00492623	CG9633
CG9839	CG9839 OS=Drosophila melanogaster GN=CG9839 PE=2 SV=1	12	0	18	0	0.296	0	3	0	4	0	0.063	0	3	0	7	0	0.047	0	0.0917517	CG9839
CG9906	CG9906 OS=Drosophila melanogaster GN=CG9906 PE=2 SV=2	0	0	0	0	0	0	2	0	3	0	0.031	0	3	0	3	0	0.044	0	0.0996796	CG9906
CG9983	Heterogeneous nuclear ribonucleoprotein A1 OS=Drosophila melanogaster GN=Hrb98DE PE=2 SV=1	8	0	13	0	0.211	0	11	0	12	0	0.17	0	3	0	9	0	0.063	0	0.0440353	CG9983
CG3909	CG3909 OS=Drosophila melanogaster GN=CG3909 PE=1 SV=1	12	0	26	0	0.299	0	11	6	23	8	0.35	0.163	2	6	2	24	0.06	0.13	0.161958	CG3909
CG5870	Spectrin beta chain OS=Drosophila melanogaster GN=beta-Spec PE=1 SV=2	0	0	0	0	0	0	4	2	4	2	0.022	0.01	2	6	2	17	0.013	0.025	0.385013	CG5870
CG4119	BcDNA.LD23634 OS=Drosophila melanogaster GN=BcDNA.LD23634 PE=1 SV=1	8	0	14	0	0.113	0	5	6	7	7	0.074	0.059	2	5	3	8	0.045	0.046	0.313659	CG4119
CG2998	40S ribosomal protein S28 OS=Drosophila melanogaster GN=RpS28b PE=3 SV=2	3	0	3	0	0.431	0	4	6	9	15	0.431	0.323	2	3	5	16	0.323	0.308	0.5	CG2998
CG4038	Probable H/ACA ribonucleoprotein complex subunit 1 OS=Drosophila melanogaster GN=CG4038 PE=1 SV=1	8	0	12	0	0.316	0	3	0	6	0	0.181	0	2	3	3	7	0.139	0.11	0.104953	CG4038
CG6905	CG6905, isoform A OS=Drosophila melanogaster GN=CG6905 PE=1 SV=2	3	0	3	0	0.069	0	4	10	6	11	0.088	0.084	2	3	3	6	0.031	0.041	0.349574	CG6905
CG12752	NTF2-related export protein OS=Drosophila melanogaster GN=Nxt1 PE=2 SV=1	3	0	3	0	0.526	0	0	0	0	0	0	0	2	2	4	2	0.128	0.12	0.210198	CG12752
CG16725	LD23602p OS=Drosophila melanogaster GN=Smn PE=1 SV=1	4	0	5	0	0.173	0	3	0	5	0	0.142	0	2	2	4	6	0.093	0.088	0.0292201	CG16725
CG17383	Jing interacting gene regulatory 1, isoform A OS=Drosophila melanogaster GN=jigr1 PE=1 SV=1	3	0	3	0	0.083	0	16	4	33	9	0.298	0.051	2	2	2	7	0.051	0.027	0.191937	CG17383
CG31613;	Histone H3 OS=Drosophila melanogaster GN=His3 PE=1 SV=4	7	0	29	0	0.368	0	3	0	3	0	0.118	0	2	2	4	9	0.132	0.051	0.0740656	CG31613;
CG3542	CG3542, isoform B OS=Drosophila melanogaster GN=CG3542 PE=1 SV=1	2	0	3	0	0.02	0	6	0	13	0	0.091	0	2	2	4	6	0.037	0.018	0.0867101	CG3542
CG3836	LD17962p OS=Drosophila melanogaster GN=stwl PE=2 SV=1	16	0	18	0	0.203	0	10	8	11	9	0.147	0.065	2	2	3	6	0.037	0.041	0.143245	CG3836
CG4268	Serine/threonine-protein kinase PITSLRE OS=Drosophila melanogaster GN=Pitslre PE=1 SV=1	7	0	9	0	0.098	0	10	4	15	7	0.114	0.047	2	2	4	3	0.027	0.017	0.0984787	CG4268
CG5825	Histone H3 OS=Drosophila melanogaster GN=His3.3A PE=3 SV=1	2	0	2	0	0.146	0	3	0	3	0	0.13	0	2	2	4	9	0.146	0.057	0.0565726	CG5825
CG5825;	Histone H3.3 OS=Drosophila melanogaster GN=His3.3A PE=1 SV=2	7	0	18	0	0.368	0	3	0	3	0	0.118	0	2	2	4	9	0.132	0.051	0.0740656	CG5825;
CG8108	CG8108, isoform A OS=Drosophila melanogaster GN=CG8108 PE=1 SV=1	8	0	12	0	0.102	0	9	4	12	6	0.103	0.047	2	2	3	6	0.017	0.021	0.0884118	CG8108
CG9253	CG9253 OS=Drosophila melanogaster GN=CG9253 PE=1 SV=1	0	0	0	0	0	0	4	0	5	0	0.057	0	2	2	2	8	0.047	0.045	0.193404	CG9253
CG9754	CG9754 OS=Drosophila melanogaster GN=CG9754 PE=1 SV=1	0	0	0	0	0	0	3	2	5	2	0.043	0.037	2	2	3	3	0.041	0.028	0.389553	CG9754
CG10011	CG10011 OS=Drosophila melanogaster GN=CG10011 PE=1 SV=1	0	0	0	0	0	0	0	0	0	0	0	0	2	0	2	0	0.015	0	0.211325	CG10011
CG10071	60S ribosomal protein L29 OS=Drosophila melanogaster GN=RpL29 PE=1 SV=1	0	0	0	0	0	0	2	0	4	0	0.145	0	2	0	2	0	0.211	0	0.0917517	CG10071
CG10221	BcDNA.LD23587 OS=Drosophila melanogaster GN=Hrd3 PE=2 SV=1	0	0	0	0	0	0	6	0	7	0	0.148	0	2	0	9	0	0.044	0	0.134852	CG10221
CG1044	Protein daughter of sevenless OS=Drosophila melanogaster GN=dos PE=1 SV=1	3	0	5	0	0.075	0	2	0	2	0	0.062	0	2	0	4	0	0.049	0	0.00990197	CG1044
CG10445	CG10445, isoform C OS=Drosophila melanogaster GN=CG10445 PE=4 SV=2	0	0	0	0	0	0	0	0	0	0	0	0	2	0	2	0	0.02	0	0.211325	CG10445
CG10463	CG10463 OS=Drosophila melanogaster GN=CG10463 PE=2 SV=1	0	0	0	0	0	0	3	0	3	0	0.066	0	2	0	5	0	0.046	0	0.0996796	CG10463
CG10536	Isoform A of Protein crossbronx OS=Drosophila melanogaster GN=cbx	0	0	0	0	0	0	0	0	0	0	0	0	2	0	7	0	0.056	0	0.211325	CG10536
CG10563	Lethal (2) 37Cd OS=Drosophila melanogaster GN=l(2)37Cd PE=2 SV=1	4	0	4	0	0.146	0	7	0	9	0	0.175	0	2	0	3	0	0.069	0	0.0482188	CG10563
CG10578	DnaJ protein homolog 1 OS=Drosophila melanogaster GN=DnaJ-1 PE=1 SV=3	2	0	2	0	0.177	0	3	0	5	0	0.075	0	2	0	6	0	0.102	0	0.00990197	CG10578
CG10628	GTP-binding protein 10 homolog OS=Drosophila melanogaster GN=CG10628 PE=2 SV=2	0	0	0	0	0	0	2	0	2	0	0.05	0	2	0	2	0	0.042	0	0.0917517	CG10628
CG10648	LD18882p OS=Drosophila melanogaster GN=Rbm13 PE=1 SV=1	0	0	0	0	0	0	2	0	2	0	0.076	0	2	0	4	0	0.07	0	0.0917517	CG10648
CG10653	Protein hook OS=Drosophila melanogaster GN=hk PE=1 SV=2	4	0	4	0	0.121	0	2	0	3	0	0.043	0	2	0	4	0	0.038	0	0.0285955	CG10653
CG10667	Origin recognition complex subunit 1 OS=Drosophila melanogaster GN=Orc1 PE=1 SV=2	13	0	18	0	0.199	0	7	3	9	3	0.079	0.022	2	0	2	0	0.025	0	0.0882824	CG10667
CG10754	CG10754 OS=Drosophila melanogaster GN=CG10754 PE=1 SV=1	5	0	5	0	0.333	0	9	0	15	0	0.303	0	2	0	5	0	0.083	0	0.0596145	CG10754
CG10809	AT16804p OS=Drosophila melanogaster GN=CG10809 PE=1 SV=1	2	0	2	0	0.064	0	2	0	4	0	0.067	0	2	0	4	0	0.078	0	#DIV/0!	CG10809
CG10840	eIF5B OS=Drosophila melanogaster GN=eIF5B PE=2 SV=2	4	0	5	0	0.045	0	0	0	0	0	0	0	2	0	3	0	0.019	0	0.112702	CG10840
CG10890	Mutagen-sensitive 201, isoform B OS=Drosophila melanogaster GN=mus201 PE=2 SV=1	0	0	0	0	0	0	0	2	0	5	0	0.025	2	0	3	0	0.024	0	0.5	CG10890
CG10964	LD36273p OS=Drosophila melanogaster GN=sni PE=1 SV=1	0	0	0	0	0	0	0	0	0	0	0	0	2	0	3	0	0.121	0	0.211325	CG10964
CG10967	Autophagy-specific gene 1, isoform A OS=Drosophila melanogaster GN=Atg1 PE=2 SV=1	3	0	3	0	0.035	0	6	0	10	0	0.049	0	2	0	2	0	0.026	0	0.0463676	CG10967
CG10992	CG10992 OS=Drosophila melanogaster GN=CG10992 PE=2 SV=1	3	0	4	0	0.132	0	0	0	0	0	0	0	2	0	5	0	0.094	0	0.0996796	CG10992
CG11107	CG11107 OS=Drosophila melanogaster GN=CG11107 PE=2 SV=1	0	0	0	0	0	0	6	4	6	4	0.097	0.044	2	0	2	0	0.027	0	0.290644	CG11107
CG11180	CG11180 OS=Drosophila melanogaster GN=CG11180 PE=1 SV=1	0	0	0	0	0	0	3	2	3	3	0.032	0.04	2	0	2	0	0.069	0	0.210198	CG11180
CG11188	Protein AATF-like OS=Drosophila melanogaster GN=CG11188 PE=1 SV=1	3	0	3	0	0.107	0	4	2	5	2	0.123	0.051	2	0	3	0	0.039	0	0.0292201	CG11188
CG11274	FI04407p OS=Drosophila melanogaster GN=SRm160 PE=1 SV=1	5	0	9	0	0.071	0	4	0	5	0	0.026	0	2	0	4	0	0.016	0	0.0266354	CG11274
CG11486	CG11486, isoform G OS=Drosophila melanogaster GN=CG11486 PE=1 SV=1	5	0	6	0	0.138	0	4	0	5	0	0.047	0	2	0	2	0	0.028	0	0.0266354	CG11486
CG11607	Homeobox protein H2.0 OS=Drosophila melanogaster GN=H2.0 PE=1 SV=2	0	0	0	0	0	0	0	0	0	0	0	0	2	0	3	0	0.033	0	0.211325	CG11607
CG11820	CG11820 OS=Drosophila melanogaster GN=PQBP1 PE=1 SV=1	5	0	5	0	0.346	0	2	0	2	0	0.091	0	2	0	2	0	0.087	0	0.047733	CG11820
CG11851	CG11851 OS=Drosophila melanogaster GN=CG11851 PE=2 SV=1	0	0	0	0	0	0	6	0	10	0	0.087	0	2	0	5	0	0.027	0	0.134852	CG11851
CG11857	CG11857, isoform B OS=Drosophila melanogaster GN=CG11857 PE=4 SV=1	0	0	0	0	0	0	2	2	8	3	0.138	0.054	2	0	3	0	0.133	0	0.259259	CG11857
CG11881	Dim gamma-tubulin 6 OS=Drosophila melanogaster GN=dgt6 PE=1 SV=1	0	0	0	0	0	0	2	0	2	0	0.028	0	2	0	2	0	0.044	0	0.0917517	CG11881
CG11883	CG11883, isoform B OS=Drosophila melanogaster GN=CG11883 PE=1 SV=1	0	0	0	0	0	0	2	0	2	0	0.036	0	2	0	2	0	0.008	0	0.0917517	CG11883
CG11982	CG11982 OS=Drosophila melanogaster GN=CG11982 PE=1 SV=1	0	0	0	0	0	0	4	0	6	0	0.166	0	2	0	2	0	0.084	0	0.112702	CG11982
CG12011	CG12011 OS=Drosophila melanogaster GN=CG12011 PE=2 SV=1	12	0	21	0	0.233	0	9	0	11	0	0.261	0	2	0	4	0	0.04	0	0.0612476	CG12011
CG12018	DNA polymerase delta small subunit OS=Drosophila melanogaster GN=CG12018 PE=2 SV=1	6	0	7	0	0.137	0	5	0	9	0	0.146	0	2	0	3	0	0.042	0	0.0345253	CG12018
CG12047	Mushroom body defect, isoform A OS=Drosophila melanogaster GN=mud PE=2 SV=2	0	0	0	0	0	0	0	0	0	0	0	0	2	0	2	0	0.012	0	0.211325	CG12047
CG12149	C12.2 OS=Drosophila melanogaster GN=c12.2 PE=4 SV=3	0	0	0	0	0	0	0	0	0	0	0	0	2	0	3	0	0.009	0	0.211325	CG12149
CG12169	AT28366p OS=Drosophila melanogaster GN=Ppm1 PE=2 SV=1	0	0	0	0	0	0	0	0	0	0	0	0	2	0	3	0	0.057	0	0.211325	CG12169
CG12176	FI02888p OS=Drosophila melanogaster GN=Lig4 PE=2 SV=1	0	0	0	0	0	0	0	0	0	0	0	0	2	0	3	0	0.017	0	0.211325	CG12176
CG12223	High mobility group protein DSP1 OS=Drosophila melanogaster GN=Dsp1 PE=2 SV=1	3	0	3	0	0.104	0	0	0	0	0	0	0	2	0	3	0	0.079	0	0.0996796	CG12223
CG12363	Dynein light chain Tctex-type OS=Drosophila melanogaster GN=Dlc90F PE=1 SV=1	2	0	3	0	0.252	0	2	2	3	2	0.09	0.117	2	0	5	0	0.09	0	0.0917517	CG12363
CG12505	Arc1 OS=Drosophila melanogaster GN=Arc1 PE=1 SV=1	0	0	0	0	0	0	0	0	0	0	0	0	2	0	4	0	0.118	0	0.211325	CG12505
CG12676	Echinoid OS=Drosophila melanogaster GN=ed PE=1 SV=2	0	0	0	0	0	0	0	0	0	0	0	0	2	0	2	0	0.017	0	0.211325	CG12676
CG12713	CG12713 OS=Drosophila melanogaster GN=CG12713 PE=2 SV=2	0	0	0	0	0	0	5	0	6	0	0.146	0	2	0	2	0	0.097	0	0.124761	CG12713
CG12924	FI05704p OS=Drosophila melanogaster GN=Lsm11 PE=1 SV=1	3	0	4	0	0.133	0	3	0	3	0	0.07	0	2	0	2	0	0.109	0	0.00763404	CG12924
CG13096	Ribosomal L1 domain-containing protein CG13096 OS=Drosophila melanogaster GN=CG13096 PE=1 SV=1	3	0	3	0	0.073	0	0	5	0	9	0	0.063	2	0	3	0	0.056	0	0.5	CG13096
CG13213	Fbl6, isoform A OS=Drosophila melanogaster GN=fbl6 PE=2 SV=1	4	0	9	0	0.128	0	4	0	6	0	0.085	0	2	0	3	0	0.044	0	0.0188748	CG13213
CG13298	Pre-mRNA branch site p14-like protein OS=Drosophila melanogaster GN=CG13298 PE=1 SV=1	3	0	6	0	0.231	0	3	0	3	0	0.215	0	2	0	10	0	0.116	0	0.00763404	CG13298
CG13401	Acyl-CoA synthetase family member 4 homolog OS=Drosophila melanogaster GN=U26 PE=2 SV=3	0	0	0	0	0	0	7	0	8	0	0.101	0	2	0	2	0	0.018	0	0.143127	CG13401
CG13531	CG13531 OS=Drosophila melanogaster GN=CG13531 PE=2 SV=1	3	0	5	0	0.042	0	12	0	13	0	0.069	0	2	0	4	0	0.009	0	0.108341	CG13531
CG13690	Ribonuclease H2 subunit A OS=Drosophila melanogaster GN=CG13690 PE=2 SV=1	0	0	0	0	0	0	2	0	2	0	0.095	0	2	0	9	0	0.075	0	0.0917517	CG13690
CG13867	Mediator of RNA polymerase II transcription subunit 8 OS=Drosophila melanogaster GN=MED8 PE=2 SV=1	2	0	3	0	0.091	0	4	0	5	0	0.139	0	2	0	6	0	0.044	0	0.0285955	CG13867
CG14001	Blue cheese OS=Drosophila melanogaster GN=bchs PE=2 SV=4	0	0	0	0	0	0	4	0	4	0	0.014	0	2	0	3	0	0.007	0	0.112702	CG14001
CG14200	CG14200 OS=Drosophila melanogaster GN=CG14200 PE=1 SV=1	0	0	0	0	0	0	0	0	0	0	0	0	2	0	2	0	0.006	0	0.211325	CG14200
CG14213	CG14213, isoform A OS=Drosophila melanogaster GN=CG14213 PE=1 SV=1	2	0	2	0	0.082	0	10	2	11	2	0.266	0.03	2	0	2	0	0.046	0	0.134823	CG14213
CG14230	Probable RNA-binding protein CG14230 OS=Drosophila melanogaster GN=CG14230 PE=1 SV=2	4	0	6	0	0.067	0	2	0	3	0	0.066	0	2	0	5	0	0.043	0	0.0285955	CG14230
CG14438	CG14438, isoform A OS=Drosophila melanogaster GN=CG14438 PE=1 SV=2	3	0	3	0	0.01	0	4	0	4	0	0.018	0	2	0	4	0	0.007	0	0.0175494	CG14438
CG14712	CG14712 OS=Drosophila melanogaster GN=CG14712 PE=1 SV=3	9	0	9	0	0.067	0	2	0	3	0	0.018	0	2	0	6	0	0.021	0	0.102206	CG14712
CG14937	CG14937 OS=Drosophila melanogaster GN=CG14937 PE=1 SV=1	2	0	2	0	0.043	0	7	0	11	0	0.112	0	2	0	3	0	0.052	0	0.0794045	CG14937
CG14992	Ack OS=Drosophila melanogaster GN=Ack PE=1 SV=2	2	0	2	0	0.032	0	2	0	2	0	0.021	0	2	0	4	0	0.02	0	#DIV/0!	CG14992
CG15087	Protein fat-free homolog OS=Drosophila melanogaster GN=CG15087 PE=1 SV=1	0	0	0	0	0	0	0	0	0	0	0	0	2	0	2	0	0.026	0	0.211325	CG15087
CG15143	CG15143 OS=Drosophila melanogaster GN=CG15143 PE=1 SV=2	0	0	0	0	0	0	0	0	0	0	0	0	2	0	2	0	0.025	0	0.211325	CG15143
CG1523	DDB1- and CUL4-associated factor 10 homolog OS=Drosophila melanogaster GN=CG1523 PE=1 SV=1	3	0	4	0	0.105	0	4	0	4	0	0.063	0	2	0	4	0	0.035	0	0.0175494	CG1523
CG15415	Spindly OS=Drosophila melanogaster GN=Spindly PE=1 SV=2	0	0	0	0	0	0	0	0	0	0	0	0	2	0	2	0	0.014	0	0.211325	CG15415
CG15609	CG15609, isoform D OS=Drosophila melanogaster GN=CG15609 PE=4 SV=1	0	0	0	0	0	0	3	0	3	0	0.029	0	2	0	5	0	0.023	0	0.0996796	CG15609
CG1582	CG1582 OS=Drosophila melanogaster GN=CG1582 PE=2 SV=2	0	0	0	0	0	0	11	0	17	0	0.086	0	2	0	3	0	0.016	0	0.164341	CG1582
CG15835	Probable lysine-specific demethylase 4A OS=Drosophila melanogaster GN=Kdm4A PE=1 SV=1	2	0	2	0	0.069	0	3	0	5	0	0.071	0	2	0	2	0	0.032	0	0.00990197	CG15835
CG15929	Lin-52 OS=Drosophila melanogaster GN=lin-52 PE=1 SV=1	0	0	0	0	0	0	0	0	0	0	0	0	2	0	3	0	0.172	0	0.211325	CG15929
CG1646	Pre-mRNA-processing factor 39 OS=Drosophila melanogaster GN=CG1646 PE=1 SV=1	6	0	7	0	0.088	0	6	3	6	4	0.048	0.02	2	0	3	0	0.023	0	0.0489844	CG1646
CG1664	Nuclear RNA export factor 1 OS=Drosophila melanogaster GN=sbr PE=1 SV=2	5	0	5	0	0.107	0	0	2	0	3	0	0.022	2	0	4	0	0.031	0	0.189256	CG1664
CG1669	Isoform B of NF-kappa-B inhibitor-interacting Ras-like protein OS=Drosophila melanogaster GN=kappaB-Ras	0	0	0	0	0	0	0	0	0	0	0	0	2	0	2	0	0.134	0	0.211325	CG1669
CG1683	ADP/ATP translocase OS=Drosophila melanogaster GN=Ant2 PE=1 SV=1	0	0	0	0	0	0	5	0	5	0	0.121	0	2	0	3	0	0.052	0	0.124761	CG1683
CG16941	CG16941 OS=Drosophila melanogaster GN=CG16941 PE=1 SV=1	0	0	0	0	0	0	0	0	0	0	0	0	2	0	4	0	0.024	0	0.211325	CG16941
CG16983	EG:115C2.4 protein OS=Drosophila melanogaster GN=skpA PE=1 SV=1	7	0	11	0	0.605	0	6	2	9	8	0.451	0.105	2	0	3	0	0.216	0	0.0441773	CG16983
CG17183	Mediator of RNA polymerase II transcription subunit 30 OS=Drosophila melanogaster GN=MED30 PE=1 SV=1	3	0	5	0	0.154	0	0	0	0	0	0	0	2	0	3	0	0.079	0	0.0996796	CG17183
CG17337	CG17337 OS=Drosophila melanogaster GN=CG17337 PE=1 SV=1	2	0	2	0	0.067	0	3	0	4	0	0.079	0	2	0	3	0	0.044	0	0.00990197	CG17337
CG1742	Microsomal glutathione S-transferase-like, isoform A OS=Drosophila melanogaster GN=Mgstl PE=2 SV=1	2	0	2	0	0.066	0	3	0	4	0	0.158	0	2	0	4	0	0.145	0	0.00990197	CG1742
CG17486	Asparagine synthetase domain-containing protein CG17486 OS=Drosophila melanogaster GN=CG17486 PE=1 SV=2	0	0	0	0	0	0	5	0	6	0	0.101	0	2	0	3	0	0.032	0	0.124761	CG17486
CG17593	CG17593 OS=Drosophila melanogaster GN=CG17593-RA PE=1 SV=1	0	0	0	0	0	0	7	2	9	8	0.126	0.057	2	0	5	0	0.074	0	0.19051	CG17593
CG17660	CG17660 OS=Drosophila melanogaster GN=CG17660 PE=1 SV=3	0	0	0	0	0	0	0	0	0	0	0	0	2	0	6	0	0.039	0	0.211325	CG17660
CG17678	Guanine nucleotide-binding protein subunit alpha homolog OS=Drosophila melanogaster GN=cta PE=2 SV=1	0	0	0	0	0	0	0	0	0	0	0	0	2	0	6	0	0.024	0	0.211325	CG17678
CG17686	DISCO interacting protein 1, isoform F OS=Drosophila melanogaster GN=DIP1 PE=1 SV=3	0	0	0	0	0	0	4	0	9	0	0.16	0	2	0	3	0	0.104	0	0.112702	CG17686
CG17712	BcDNA.GH03377 OS=Drosophila melanogaster GN=BcDNA.GH03377 PE=1 SV=1	3	0	3	0	0.099	0	5	0	6	0	0.102	0	2	0	5	0	0.042	0	0.0317071	CG17712
CG17746	CG17746, isoform A OS=Drosophila melanogaster GN=CG17746 PE=2 SV=1	2	0	4	0	0.1	0	0	0	0	0	0	0	2	0	3	0	0.054	0	0.0917517	CG17746
CG17870	Isoform VI' of 14-3-3 protein zeta OS=Drosophila melanogaster GN=14-3-3zeta	6	0	7	0	0.359	0	0	0	0	0	0	0	2	0	2	0	0.032	0	0.134852	CG17870
CG17998	G protein-coupled receptor kinase 2 OS=Drosophila melanogaster GN=Gprk2 PE=1 SV=3	0	0	0	0	0	0	6	2	12	2	0.104	0.02	2	0	2	0	0.034	0	0.189265	CG17998
CG18004	CG18004, isoform A OS=Drosophila melanogaster GN=CG18004 PE=4 SV=1	2	0	2	0	0.088	0	0	2	0	3	0	0.066	2	0	2	0	0.081	0	0.259259	CG18004
CG18028	LD33620p OS=Drosophila melanogaster GN=lt PE=1 SV=1	2	0	2	0	0.024	0	4	0	5	0	0.073	0	2	0	3	0	0.031	0	0.0285955	CG18028
CG18041	Dim gamma-tubulin 1 OS=Drosophila melanogaster GN=dgt1 PE=1 SV=2	6	0	7	0	0.149	0	11	6	17	14	0.19	0.058	2	0	3	0	0.041	0	0.13082	CG18041
CG1815	CG1815, isoform C OS=Drosophila melanogaster GN=CG1815 PE=1 SV=1	2	0	3	0	0.021	0	5	0	5	0	0.044	0	2	0	4	0	0.022	0	0.047733	CG1815
CG18190	CG18190 OS=Drosophila melanogaster GN=CG18190 PE=4 SV=2	3	0	3	0	0.206	0	7	0	12	0	0.145	0	2	0	3	0	0.089	0	0.0600587	CG18190
CG1888	CG1888 OS=Drosophila melanogaster GN=CG1888 PE=1 SV=1	4	0	4	0	0.231	0	7	0	12	0	0.261	0	2	0	2	0	0.067	0	0.0482188	CG1888
CG1956	Ras-like protein 3 OS=Drosophila melanogaster GN=R PE=2 SV=2	8	0	10	0	0.473	0	3	0	3	0	0.196	0	2	0	3	0	0.12	0	0.0723314	CG1956
CG2049	Protein kinase related to protein kinase N, isoform G OS=Drosophila melanogaster GN=Pkn PE=4 SV=1	3	0	3	0	0.017	0	10	2	13	3	0.086	0.008	2	0	4	0	0.033	0	0.111247	CG2049
CG2061	LanC-like protein 3 homolog OS=Drosophila melanogaster GN=CG2061 PE=1 SV=1	0	0	0	0	0	0	0	0	0	0	0	0	2	0	2	0	0.053	0	0.211325	CG2061
CG2128	Histone deacetylase OS=Drosophila melanogaster GN=Hdac3 PE=2 SV=1	0	0	0	0	0	0	3	0	3	0	0.098	0	2	0	3	0	0.046	0	0.0996796	CG2128
CG2210	Nucleoside diphosphate kinase OS=Drosophila melanogaster GN=awd PE=1 SV=3	7	0	8	0	0.458	0	2	0	5	0	0.078	0	2	0	3	0	0.163	0	0.0794045	CG2210
CG2221	LD40707p OS=Drosophila melanogaster GN=l(1)G0289 PE=2 SV=1	0	0	0	0	0	0	3	4	4	4	0.058	0.058	2	0	4	0	0.034	0	0.423243	CG2221
CG2248	Ras-related protein Rac1 OS=Drosophila melanogaster GN=Rac1 PE=1 SV=2	0	0	0	0	0	0	0	0	0	0	0	0	2	0	2	0	0.125	0	0.211325	CG2248
CG2253	RE04053p OS=Drosophila melanogaster GN=Upf2 PE=2 SV=1	4	0	4	0	0.045	0	9	0	16	0	0.076	0	2	0	4	0	0.015	0	0.0691363	CG2253
CG2508	Cdc23 OS=Drosophila melanogaster GN=cdc23 PE=1 SV=2	5	0	5	0	0.124	0	9	0	11	0	0.121	0	2	0	4	0	0.027	0	0.0596145	CG2508
CG2656	CG2656 OS=Drosophila melanogaster GN=CG2656 PE=2 SV=2	4	0	4	0	0.307	0	4	0	5	0	0.201	0	2	0	3	0	0.057	0	0.0188748	CG2656
CG2691	RRP12-like protein OS=Drosophila melanogaster GN=CG2691 PE=1 SV=2	4	0	5	0	0.054	0	5	0	6	0	0.038	0	2	0	2	0	0.016	0	0.0266354	CG2691
CG2924	CG2924, isoform A OS=Drosophila melanogaster GN=CG2924 PE=1 SV=1	4	0	4	0	0.118	0	2	0	7	0	0.065	0	2	0	5	0	0.048	0	0.0285955	CG2924
CG2926	CG2926 OS=Drosophila melanogaster GN=CG2926 PE=1 SV=1	6	0	7	0	0.041	0	0	0	0	0	0	0	2	0	2	0	0.01	0	0.134852	CG2926
CG2945	Molybdenum cofactor synthesis protein cinnamon OS=Drosophila melanogaster GN=cin PE=1 SV=3	0	0	0	0	0	0	2	0	2	0	0.037	0	2	0	4	0	0.047	0	0.0917517	CG2945
CG3008	CG3008 OS=Drosophila melanogaster GN=CG3008 PE=2 SV=1	4	0	6	0	0.118	0	4	0	5	0	0.075	0	2	0	4	0	0.03	0	0.0188748	CG3008
CG3033	CG3033 OS=Drosophila melanogaster GN=CG3033 PE=2 SV=1	0	0	0	0	0	0	14	0	22	0	0.181	0	2	0	5	0	0.037	0	0.173401	CG3033
CG30342	GM13395p OS=Drosophila melanogaster GN=Prp38 PE=1 SV=1	9	0	14	0	0.258	0	8	3	10	4	0.23	0.067	2	0	3	0	0.048	0	0.0597273	CG30342
CG30489	Probable cytochrome P450 12d1 proximal, mitochondrial OS=Drosophila melanogaster GN=Cyp12d1-p PE=2 SV=3	2	0	2	0	0.052	0	8	0	9	0	0.131	0	2	0	4	0	0.04	0	0.0917517	CG30489
CG3069	Transcription initiation factor TFIID subunit 10b OS=Drosophila melanogaster GN=Taf10b PE=1 SV=1	7	0	9	0	0.329	0	5	0	5	0	0.288	0	2	0	7	0	0.192	0	0.0423957	CG3069
CG31000	Hephaestus, isoform L OS=Drosophila melanogaster GN=heph PE=4 SV=1	10	0	14	0	0.236	0	10	0	12	0	0.153	0	2	0	5	0	0.047	0	0.0553514	CG31000
CG31002	CG31002 OS=Drosophila melanogaster GN=CG15569 PE=2 SV=2	0	0	0	0	0	0	0	0	0	0	0	0	2	0	6	0	0.042	0	0.211325	CG31002
CG31116	CG31116, isoform H OS=Drosophila melanogaster GN=ClC-a PE=4 SV=1	0	0	0	0	0	0	0	0	0	0	0	0	2	0	3	0	0.011	0	0.211325	CG31116
CG31122	CG31122, isoform B OS=Drosophila melanogaster GN=CG7687 PE=2 SV=1	0	0	0	0	0	0	0	0	0	0	0	0	2	0	4	0	0.042	0	0.211325	CG31122
CG31132	BRWD3 OS=Drosophila melanogaster GN=BRWD3 PE=2 SV=2	3	0	3	0	0.035	0	3	0	3	0	0.02	0	2	0	5	0	0.009	0	0.00763404	CG31132
CG31249	CG31249 OS=Drosophila melanogaster GN=CG7477 PE=2 SV=2	6	0	6	0	0.3	0	2	0	3	0	0.088	0	2	0	5	0	0.088	0	0.0648059	CG31249
CG31256	Brf, isoform A OS=Drosophila melanogaster GN=Brf PE=2 SV=2	2	0	2	0	0.08	0	0	0	0	0	0	0	2	0	3	0	0.032	0	0.0917517	CG31256
CG31363	Microtubule-associated protein Jupiter OS=Drosophila melanogaster GN=Jupiter PE=1 SV=2	0	0	0	0	0	0	0	0	0	0	0	0	2	0	2	0	0.168	0	0.211325	CG31363
CG31390	Mediator of RNA polymerase II transcription subunit 7 OS=Drosophila melanogaster GN=MED7 PE=1 SV=1	3	0	4	0	0.173	0	0	0	0	0	0	0	2	0	3	0	0.123	0	0.0996796	CG31390
CG31650	CG31650, isoform A OS=Drosophila melanogaster GN=CG9112 PE=2 SV=1	0	0	0	0	0	0	0	0	0	0	0	0	2	0	4	0	0.026	0	0.211325	CG31650
CG31687	CG31687, isoform A OS=Drosophila melanogaster GN=CG31687 PE=2 SV=2	4	0	4	0	0.077	0	7	0	7	0	0.162	0	2	0	4	0	0.025	0	0.0482188	CG31687
CG31694	CG31694 OS=Drosophila melanogaster GN=CG3098 PE=1 SV=2	8	0	10	0	0.212	0	19	0	27	0	0.322	0	2	0	4	0	0.071	0	0.0958164	CG31694
CG31865	Ada1-1 OS=Drosophila melanogaster GN=Ada1-1 PE=2 SV=1	0	0	0	0	0	0	2	0	3	0	0.117	0	2	0	5	0	0.123	0	0.0917517	CG31865
CG31866	Ada1-2 OS=Drosophila melanogaster GN=Ada1-2 PE=2 SV=1	0	0	0	0	0	0	2	0	3	0	0.117	0	2	0	5	0	0.123	0	0.0917517	CG31866
CG32019	Bent, isoform G OS=Drosophila melanogaster GN=bt PE=4 SV=1	2	0	2	0	0.003	0	0	0	0	0	0	0	2	0	2	0	0.003	0	0.0917517	CG32019
CG3227	CG3227 OS=Drosophila melanogaster GN=insv PE=1 SV=1	2	0	2	0	0.074	0	0	0	0	0	0	0	2	0	2	0	0.069	0	0.0917517	CG3227
CG32318	CG32318 OS=Drosophila melanogaster GN=CG32318-RA PE=2 SV=1	2	0	2	0	0.098	0	0	0	0	0	0	0	2	0	2	0	0.061	0	0.0917517	CG32318
CG32562	Protein xmas-2 OS=Drosophila melanogaster GN=xmas-2 PE=1 SV=3	3	0	3	0	0.051	0	2	2	3	2	0.013	0.009	2	0	2	0	0.011	0	0.0565726	CG32562
CG32654	Sec16, isoform E OS=Drosophila melanogaster GN=Sec16 PE=4 SV=1	0	0	0	0	0	0	5	0	6	0	0.054	0	2	0	4	0	0.01	0	0.124761	CG32654
CG32685	CG32685 OS=Drosophila melanogaster GN=CG32685 PE=1 SV=2	0	0	0	0	0	0	0	0	0	0	0	0	2	0	3	0	0.008	0	0.211325	CG32685
CG32707	Anaphase promoting complex 4, isoform A OS=Drosophila melanogaster GN=APC4 PE=2 SV=1	0	0	0	0	0	0	5	0	8	0	0.058	0	2	0	8	0	0.019	0	0.124761	CG32707
CG32737	CG33691, isoform A OS=Drosophila melanogaster GN=CG32737 PE=2 SV=3	2	0	2	0	0.053	0	6	0	8	0	0.161	0	2	0	3	0	0.03	0	0.0648059	CG32737
CG32743	Serine/threonine-protein kinase Smg1 OS=Drosophila melanogaster GN=Smg1 PE=1 SV=2	0	0	0	0	0	0	6	0	7	0	0.021	0	2	0	4	0	0.005	0	0.134852	CG32743
CG3319	Cyclin-dependent kinase 7 OS=Drosophila melanogaster GN=Cdk7 PE=1 SV=1	2	0	2	0	0.059	0	5	0	6	0	0.167	0	2	0	3	0	0.048	0	0.047733	CG3319
CG3322	Laminin subunit gamma-1 OS=Drosophila melanogaster GN=LanB2 PE=1 SV=2	0	0	0	0	0	0	2	0	3	0	0.039	0	2	0	4	0	0.016	0	0.0917517	CG3322
CG3326	Fidgetin-like protein 1 OS=Drosophila melanogaster GN=CG3326 PE=2 SV=2	3	0	4	0	0.103	0	3	0	5	0	0.067	0	2	0	3	0	0.05	0	0.00763404	CG3326
CG33503	Probable cytochrome P450 12d1 distal, mitochondrial OS=Drosophila melanogaster GN=Cyp12d1-d PE=2 SV=1	2	0	2	0	0.052	0	7	0	8	0	0.104	0	2	0	4	0	0.04	0	0.0794045	CG33503
CG33522	Scaf6, isoform B OS=Drosophila melanogaster GN=scaf6 PE=2 SV=1	0	0	0	0	0	0	6	5	11	6	0.091	0.046	2	0	4	0	0.023	0	0.350735	CG33522
CG33695	CG33695, isoform A OS=Drosophila melanogaster GN=CG33695 PE=2 SV=1	5	0	5	0	0.22	0	3	0	4	0	0.115	0	2	0	3	0	0.092	0	0.0317071	CG33695
CG33714	CG33714, isoform A OS=Drosophila melanogaster GN=CG33714 PE=2 SV=1	0	0	0	0	0	0	3	0	4	0	0.311	0	2	0	3	0	0.122	0	0.0996796	CG33714
CG3428	FI06792p OS=Drosophila melanogaster GN=pall PE=1 SV=1	3	0	3	0	0.162	0	4	0	6	0	0.143	0	2	0	3	0	0.089	0	0.0175494	CG3428
CG3473	Ubiquitin carrier protein OS=Drosophila melanogaster GN=CG3473 PE=2 SV=1	2	0	2	0	0.066	0	2	0	2	0	0.066	0	2	0	6	0	0.172	0	#DIV/0!	CG3473
CG3496	Protein virilizer OS=Drosophila melanogaster GN=vir PE=1 SV=1	0	0	0	0	0	0	4	0	10	0	0.023	0	2	0	2	0	0.013	0	0.112702	CG3496
CG3520	CG3520 OS=Drosophila melanogaster GN=CG3520 PE=2 SV=2	2	0	2	0	0.033	0	8	0	9	0	0.055	0	2	0	4	0	0.014	0	0.0917517	CG3520
CG3525	Ethanolamine kinase OS=Drosophila melanogaster GN=eas PE=1 SV=2	0	0	0	0	0	0	4	0	4	0	0.135	0	2	0	2	0	0.071	0	0.112702	CG3525
CG3539	Isoform C of Protein sly1 homolog OS=Drosophila melanogaster GN=Slh	5	0	6	0	0.11	0	5	2	6	2	0.08	0.022	2	0	2	0	0.047	0	0.029282	CG3539
CG3633	LD41023p OS=Drosophila melanogaster GN=mRpS29 PE=2 SV=1	5	0	7	0	0.202	0	6	0	7	0	0.214	0	2	0	6	0	0.041	0	0.0345253	CG3633
CG3731	CG3731, isoform A OS=Drosophila melanogaster GN=CG3731 PE=2 SV=2	3	0	3	0	0.113	0	0	0	0	0	0	0	2	0	2	0	0.068	0	0.0996796	CG3731
CG3780	RE50839p OS=Drosophila melanogaster GN=Spx PE=1 SV=1	3	0	12	0	0.144	0	3	0	4	0	0.086	0	2	0	3	0	0.043	0	0.00763404	CG3780
CG3811	Organic anion transporting polypeptide 30B, isoform A OS=Drosophila melanogaster GN=Oatp30B PE=1 SV=2	0	0	0	0	0	0	0	0	0	0	0	0	2	0	2	0	0.028	0	0.211325	CG3811
CG3848	Isoform 2 of Histone-lysine N-methyltransferase trr OS=Drosophila melanogaster GN=trr	5	0	5	0	0.031	0	11	0	18	0	0.076	0	2	0	5	0	0.01	0	0.0757359	CG3848
CG3941	Pita, isoform B OS=Drosophila melanogaster GN=pita PE=2 SV=2	6	0	9	0	0.213	0	9	2	18	2	0.132	0.034	2	0	5	0	0.04	0	0.0607223	CG3941
CG3959	Protein pelota OS=Drosophila melanogaster GN=pelo PE=1 SV=2	0	0	0	0	0	0	0	0	0	0	0	0	2	0	5	0	0.048	0	0.211325	CG3959
CG3969	Tyrosine-protein kinase PR2 OS=Drosophila melanogaster GN=PR2 PE=1 SV=3	3	0	5	0	0.032	0	10	0	13	0	0.074	0	2	0	3	0	0.016	0	0.0926559	CG3969
CG3971	Baldspot, isoform A OS=Drosophila melanogaster GN=Baldspot PE=2 SV=2	0	0	0	0	0	0	5	0	9	0	0.117	0	2	0	6	0	0.082	0	0.124761	CG3971
CG4012	Serine/threonine-protein kinase Genghis Khan OS=Drosophila melanogaster GN=gek PE=1 SV=1	0	0	0	0	0	0	0	0	0	0	0	0	2	0	2	0	0.015	0	0.211325	CG4012
CG4013	Smrter, isoform A OS=Drosophila melanogaster GN=Smr PE=2 SV=2	0	0	0	0	0	0	3	0	4	0	0.007	0	2	0	3	0	0.007	0	0.0996796	CG4013
CG4032	Tyrosine-protein kinase Abl OS=Drosophila melanogaster GN=Abl PE=1 SV=3	4	0	4	0	0.036	0	6	0	8	0	0.04	0	2	0	3	0	0.025	0	0.03709	CG4032
CG40801	CG40801 OS=Drosophila melanogaster GN=CG40801 PE=3 SV=1	2	0	3	0	0.179	0	10	0	15	0	0.229	0	2	0	4	0	0.114	0	0.111111	CG40801
CG4091	Tumor necrosis factor alpha-induced protein 8-like protein OS=Drosophila melanogaster GN=CG4091 PE=2 SV=2	0	0	0	0	0	0	0	0	0	0	0	0	2	0	2	0	0.122	0	0.211325	CG4091
CG4122	Carboxypeptidase D OS=Drosophila melanogaster GN=svr PE=1 SV=2	0	0	0	0	0	0	0	0	0	0	0	0	2	0	4	0	0.014	0	0.211325	CG4122
CG41454	CG41454 OS=Drosophila melanogaster GN=CG41454 PE=4 SV=1	4	0	7	0	0.204	0	4	0	5	0	0.175	0	2	0	2	0	0.071	0	0.0188748	CG41454
CG4165	Ubiquitin carboxyl-terminal hydrolase OS=Drosophila melanogaster GN=CG4165 PE=1 SV=1	0	0	0	0	0	0	0	0	0	0	0	0	2	0	3	0	0.033	0	0.211325	CG4165
CG4203	MAU2 chromatid cohesion factor homolog OS=Drosophila melanogaster GN=CG4203 PE=2 SV=1	8	0	9	0	0.098	0	13	2	16	2	0.18	0.017	2	0	6	0	0.036	0	0.0768259	CG4203
CG4206	DNA replication licensing factor Mcm3 OS=Drosophila melanogaster GN=Mcm3 PE=1 SV=1	0	0	0	0	0	0	2	0	3	0	0.028	0	2	0	2	0	0.028	0	0.0917517	CG4206
CG42253	Na+ driven anion exchanger NDAE1 OS=Drosophila melanogaster GN=Ndae1 PE=1 SV=2	0	0	0	0	0	0	0	0	0	0	0	0	2	0	3	0	0.008	0	0.211325	CG42253
CG42396	Protein wech OS=Drosophila melanogaster GN=wech PE=1 SV=2	7	0	7	0	0.077	0	11	0	12	0	0.144	0	2	0	3	0	0.04	0	0.0623119	CG42396
CG42572	LD43341p OS=Drosophila melanogaster GN=MCPH1 PE=2 SV=1	3	0	3	0	0.038	0	4	0	4	0	0.068	0	2	0	3	0	0.016	0	0.0175494	CG42572
CG42588	CG42588 OS=Drosophila melanogaster GN=CG42588 PE=1 SV=4	0	0	0	0	0	0	0	2	0	2	0	0.005	2	0	2	0	0.009	0	0.5	CG42588
CG42670	PASILLA splice variant 4 OS=Drosophila melanogaster GN=ps PE=2 SV=1	2	0	3	0	0.057	0	2	0	3	0	0.05	0	2	0	3	0	0.045	0	#DIV/0!	CG42670
CG42768	Muscle-specific protein 300, isoform D OS=Drosophila melanogaster GN=Msp-300 PE=1 SV=2	0	0	0	0	0	0	0	0	0	0	0	0	2	0	6	0	0.001	0	0.211325	CG42768
CG42799	CG32394 OS=Drosophila melanogaster GN=dikar PE=1 SV=1	3	0	3	0	0.014	0	0	0	0	0	0	0	2	0	2	0	0.01	0	0.0996796	CG42799
CG4332	CG4332 OS=Drosophila melanogaster GN=CG4332 PE=1 SV=1	4	0	4	0	0.094	0	9	0	13	0	0.13	0	2	0	2	0	0.027	0	0.0691363	CG4332
CG4364	Pescadillo homolog OS=Drosophila melanogaster GN=CG4364 PE=1 SV=1	5	0	6	0	0.12	0	7	0	11	0	0.132	0	2	0	3	0	0.045	0	0.0423957	CG4364
CG44123	Forkhead domain 3F OS=Drosophila melanogaster GN=fd3F PE=1 SV=3	0	0	0	0	0	0	0	0	0	0	0	0	2	0	6	0	0.028	0	0.211325	CG44123
CG44193	CG34306 OS=Drosophila melanogaster GN=CG34306 PE=4 SV=1	2	0	2	0	0.012	0	0	0	0	0	0	0	2	0	2	0	0.005	0	0.0917517	CG44193
CG4452-RB	CG4452, isoform B OS=Drosophila melanogaster GN=CG4452-RB PE=2 SV=2	2	0	3	0	0.084	0	10	0	13	0	0.316	0	2	0	4	0	0.144	0	0.111111	CG4452-RB
CG4501	Very long-chain-fatty-acid--CoA ligase bubblegum OS=Drosophila melanogaster GN=bgm PE=2 SV=1	2	0	2	0	0.059	0	3	0	3	0	0.05	0	2	0	3	0	0.032	0	0.00990197	CG4501
CG4548	Transcriptional regulator ATRX homolog OS=Drosophila melanogaster GN=XNP PE=1 SV=2	0	0	0	0	0	0	5	0	6	0	0.042	0	2	0	2	0	0.018	0	0.124761	CG4548
CG4554	CG4554 OS=Drosophila melanogaster GN=CG4554 PE=1 SV=2	5	2	6	2	0.034	0.01	5	0	7	0	0.024	0	2	0	2	0	0.007	0	0.029282	CG4554
CG4584	Deoxyuridine triphosphatase, isoform B OS=Drosophila melanogaster GN=dUTPase PE=2 SV=1	0	0	0	0	0	0	0	0	0	0	0	0	2	0	2	0	0.098	0	0.211325	CG4584
CG4656	LD40758p OS=Drosophila melanogaster GN=Rassf PE=1 SV=3	5	0	7	0	0.068	0	5	2	6	5	0.06	0.014	2	0	2	0	0.014	0	0.029282	CG4656
CG4699	CG4699, isoform J OS=Drosophila melanogaster GN=wah PE=4 SV=1	4	0	4	0	0.075	0	7	4	9	6	0.076	0.03	2	0	2	0	0.03	0	0.101675	CG4699
CG4709	Zinc finger CCCH-type with G patch domain-containing protein OS=Drosophila melanogaster GN=CG4709 PE=2 SV=1	4	0	4	0	0.094	0	6	0	10	0	0.135	0	2	0	3	0	0.027	0	0.03709	CG4709
CG4751	MPN domain-containing protein CG4751 OS=Drosophila melanogaster GN=CG4751 PE=1 SV=1	7	0	11	0	0.094	0	9	0	13	0	0.093	0	2	0	2	0	0.016	0	0.0511208	CG4751
CG4752	CG4752 OS=Drosophila melanogaster GN=CG4752-RA PE=2 SV=2	2	0	3	0	0.01	0	4	0	5	0	0.061	0	2	0	5	0	0.022	0	0.0285955	CG4752
CG4756	Histone deacetylase complex subunit SAP30 homolog OS=Drosophila melanogaster GN=Sap30 PE=1 SV=1	5	0	5	0	0.37	0	0	0	0	0	0	0	2	0	4	0	0.145	0	0.124761	CG4756
CG4764	CG4764 OS=Drosophila melanogaster GN=CG4764 PE=1 SV=1	0	0	0	0	0	0	0	0	0	0	0	0	2	0	3	0	0.099	0	0.211325	CG4764
CG4788	CG4788 OS=Drosophila melanogaster GN=CG4788-RA PE=1 SV=1	0	0	0	0	0	0	3	2	4	3	0.171	0.04	2	0	3	0	0.079	0	0.210198	CG4788
CG4817	FACT complex subunit Ssrp1 OS=Drosophila melanogaster GN=Ssrp PE=1 SV=2	3	0	3	0	0.058	0	3	0	5	0	0.035	0	2	0	2	0	0.021	0	0.00763404	CG4817
CG4877	CG4877, isoform A OS=Drosophila melanogaster GN=CG4877 PE=1 SV=3	18	0	24	0	0.232	0	12	3	18	7	0.107	0.034	2	0	6	0	0.03	0	0.0846369	CG4877
CG4903	Misexpression suppressor of ras 4, isoform A OS=Drosophila melanogaster GN=MESR4 PE=1 SV=1	0	0	0	0	0	0	0	0	0	0	0	0	2	0	4	0	0.008	0	0.211325	CG4903
CG4931	Cytoplasmic FMR1-interacting protein OS=Drosophila melanogaster GN=Sra-1 PE=1 SV=1	0	0	0	0	0	0	4	0	7	0	0.04	0	2	0	3	0	0.011	0	0.112702	CG4931
CG4934	Beta-1,3-galactosyltransferase brn OS=Drosophila melanogaster GN=brn PE=1 SV=2	0	0	0	0	0	0	2	0	2	0	0.068	0	2	0	3	0	0.068	0	0.0917517	CG4934
CG4994	Mitochondrial phosphate carrier protein, isoform A OS=Drosophila melanogaster GN=Mpcp PE=2 SV=1	0	0	0	0	0	0	4	0	6	0	0.121	0	2	0	5	0	0.067	0	0.112702	CG4994
CG5041	FI01003p OS=Drosophila melanogaster GN=Tfb4 PE=2 SV=2	4	0	4	0	0.204	0	4	0	7	0	0.11	0	2	0	4	0	0.04	0	0.0188748	CG5041
CG5075	AT09773p OS=Drosophila melanogaster GN=Vha68-3 PE=1 SV=1	3	0	3	0	0.052	0	4	0	4	0	0.055	0	2	0	3	0	0.03	0	0.0175494	CG5075
CG5105	Phospholipase A2 activator protein OS=Drosophila melanogaster GN=Plap PE=2 SV=1	0	0	0	0	0	0	0	0	0	0	0	0	2	0	3	0	0.036	0	0.211325	CG5105
CG5165	Phosphoglucomutase OS=Drosophila melanogaster GN=Pgm PE=1 SV=1	3	0	5	0	0.082	0	2	0	2	0	0.054	0	2	0	3	0	0.043	0	0.00990197	CG5165
CG5181	SOSS complex subunit B homolog OS=Drosophila melanogaster GN=CG5181 PE=2 SV=1	4	0	6	0	0.176	0	7	0	10	0	0.294	0	2	0	5	0	0.078	0	0.0482188	CG5181
CG5193	Transcription initiation factor IIB OS=Drosophila melanogaster GN=TfIIB PE=2 SV=1	2	0	3	0	0.149	0	6	0	10	0	0.229	0	2	0	6	0	0.076	0	0.0648059	CG5193
CG5263	Protein Smaug OS=Drosophila melanogaster GN=smg PE=1 SV=2	3	0	4	0	0.07	0	2	0	2	0	0.023	0	2	0	2	0	0.026	0	0.00990197	CG5263
CG5384	Ubiquitin carboxyl-terminal hydrolase OS=Drosophila melanogaster GN=CG5384 PE=2 SV=1	5	0	6	0	0.173	0	4	0	6	0	0.114	0	2	0	4	0	0.057	0	0.0266354	CG5384
CG5439	CG5439 OS=Drosophila melanogaster GN=CG5439 PE=2 SV=1	3	0	3	0	0.15	0	4	0	6	0	0.088	0	2	0	3	0	0.058	0	0.0175494	CG5439
CG5460	Protein hairless OS=Drosophila melanogaster GN=H PE=1 SV=2	0	0	0	0	0	0	8	0	10	0	0.075	0	2	0	2	0	0.006	0	0.14993	CG5460
CG5580	Brakeless-B OS=Drosophila melanogaster GN=sbb PE=1 SV=1	2	0	3	0	0.023	0	4	0	5	0	0.02	0	2	0	3	0	0.012	0	0.0285955	CG5580
CG5677	Signal peptidase complex subunit 3 OS=Drosophila melanogaster GN=Spase22-23 PE=2 SV=1	2	0	2	0	0.117	0	4	0	4	0	0.19	0	2	0	2	0	0.123	0	0.0285955	CG5677
CG5709	Protein ariadne-2 OS=Drosophila melanogaster GN=ari-2 PE=1 SV=1	0	0	0	0	0	0	2	0	2	0	0.031	0	2	0	2	0	0.039	0	0.0917517	CG5709
CG5720	BcDNA.LD27873 OS=Drosophila melanogaster GN=BcDNA.LD27873 PE=1 SV=1	8	0	11	0	0.164	0	0	0	0	0	0	0	2	0	3	0	0.033	0	0.14993	CG5720
CG5757	CG5757 OS=Drosophila melanogaster GN=CG5757 PE=3 SV=1	4	0	4	0	0.27	0	2	0	2	0	0.114	0	2	0	2	0	0.081	0	0.0285955	CG5757
CG5787	CG5787 OS=Drosophila melanogaster GN=CG5787 PE=1 SV=2	8	0	14	0	0.098	0	0	0	0	0	0	0	2	0	5	0	0.018	0	0.14993	CG5787
CG5874	Negative elongation factor A OS=Drosophila melanogaster GN=Nelf-A PE=1 SV=2	2	0	2	0	0.025	0	7	0	8	0	0.075	0	2	0	2	0	0.026	0	0.0794045	CG5874
CG5933	Probable N6-adenosine-methyltransferase MT-A70-like protein OS=Drosophila melanogaster GN=CG5933 PE=1 SV=1	0	0	0	0	0	0	0	0	0	0	0	0	2	0	2	0	0.035	0	0.211325	CG5933
CG5973	CG5973, isoform A OS=Drosophila melanogaster GN=CG5973 PE=1 SV=2	0	0	0	0	0	0	3	0	5	0	0.116	0	2	0	6	0	0.042	0	0.0996796	CG5973
CG5974	Serine/threonine-protein kinase pelle OS=Drosophila melanogaster GN=pll PE=1 SV=1	3	0	3	0	0.128	0	8	0	12	0	0.17	0	2	0	4	0	0.038	0	0.0723314	CG5974
CG5994	Negative elongation factor E OS=Drosophila melanogaster GN=Nelf-E PE=1 SV=1	5	0	6	0	0.286	0	6	0	8	0	0.246	0	2	0	11	0	0.093	0	0.0345253	CG5994
CG6170	HDAC6, isoform D OS=Drosophila melanogaster GN=HDAC6 PE=2 SV=1	0	0	0	0	0	0	0	0	0	0	0	0	2	0	7	0	0.025	0	0.211325	CG6170
CG6176	Gamma-tubulin complex component 4 homolog OS=Drosophila melanogaster GN=Grip75 PE=1 SV=2	5	0	6	0	0.091	0	8	0	11	0	0.117	0	2	0	2	0	0.022	0	0.0509867	CG6176
CG6194	CG6194 OS=Drosophila melanogaster GN=CG6194-RA PE=2 SV=2	0	0	0	0	0	0	0	0	0	0	0	0	2	0	3	0	0.042	0	0.211325	CG6194
CG6232	CG6232, isoform A OS=Drosophila melanogaster GN=CG6232 PE=2 SV=3	0	0	0	0	0	0	0	0	0	0	0	0	2	0	8	0	0.007	0	0.211325	CG6232
CG6315	Pre-mRNA-splicing regulator female-lethal(2)D OS=Drosophila melanogaster GN=fl(2)d PE=1 SV=2	2	0	2	0	0.028	0	4	2	6	3	0.086	0.021	2	0	3	0	0.035	0	0.0505958	CG6315
CG6338	DNA-binding protein Ets97D OS=Drosophila melanogaster GN=Ets97D PE=1 SV=2	2	0	2	0	0.086	0	5	0	6	0	0.099	0	2	0	3	0	0.041	0	0.047733	CG6338
CG6355	Putative 1-phosphatidylinositol-3-phosphate 5-kinase OS=Drosophila melanogaster GN=fab1 PE=1 SV=2	3	0	4	0	0.03	0	7	0	8	0	0.045	0	2	0	6	0	0.012	0	0.0600587	CG6355
CG6511	CG6511 OS=Drosophila melanogaster GN=CG6511 PE=1 SV=2	4	0	4	0	0.073	0	10	0	13	0	0.079	0	2	0	3	0	0.015	0	0.078363	CG6511
CG6568	CG6568 OS=Drosophila melanogaster GN=CG6568 PE=1 SV=1	0	0	0	0	0	0	6	0	6	0	0.151	0	2	0	4	0	0.027	0	0.134852	CG6568
CG6647	Voltage-dependent anion-selective channel OS=Drosophila melanogaster GN=porin PE=1 SV=3	8	0	8	0	0.351	0	3	2	5	3	0.135	0.05	2	0	4	0	0.113	0	0.0888581	CG6647
CG6819	Nuclear pore complex protein Nup88 OS=Drosophila melanogaster GN=mbo PE=1 SV=2	5	0	7	0	0.12	0	3	0	3	0	0.044	0	2	0	4	0	0.046	0	0.0317071	CG6819
CG6850	UDP-glucose:glycoprotein glucosyltransferase OS=Drosophila melanogaster GN=Ugt PE=1 SV=2	0	0	0	0	0	0	7	0	7	0	0.041	0	2	0	3	0	0.021	0	0.143127	CG6850
CG6930	Lethal (3) neo38, isoform B OS=Drosophila melanogaster GN=l(3)neo38 PE=2 SV=1	4	0	9	0	0.123	0	7	0	8	0	0.154	0	2	0	4	0	0.043	0	0.0482188	CG6930
CG6948	Clathrin light chain OS=Drosophila melanogaster GN=Clc PE=1 SV=1	0	0	0	0	0	0	0	0	0	0	0	0	2	0	2	0	0.105	0	0.211325	CG6948
CG7085	LD23816p OS=Drosophila melanogaster GN=l(2)s5379 PE=1 SV=1	11	0	18	0	0.469	0	11	5	21	12	0.224	0.082	2	0	4	0	0.054	0	0.0792018	CG7085
CG7092	Dynein heavy chain at 16F OS=Drosophila melanogaster GN=Dhc16F PE=2 SV=1	0	0	0	0	0	0	2	0	2	0	0.006	0	2	0	2	0	0.009	0	0.0917517	CG7092
CG7176	Isocitrate dehydrogenase [NADP] OS=Drosophila melanogaster GN=Idh PE=1 SV=2	4	0	4	0	0.22	0	2	0	3	0	0.056	0	2	0	2	0	0.062	0	0.0285955	CG7176
CG7185	Cleavage and polyadenylation specificity factor subunit CG7185 OS=Drosophila melanogaster GN=CG7185 PE=1 SV=2	4	0	5	0	0.13	0	0	0	0	0	0	0	2	0	2	0	0.043	0	0.112702	CG7185
CG7208	CG7208, isoform B OS=Drosophila melanogaster GN=CG7208 PE=1 SV=2	0	0	0	0	0	0	3	0	5	0	0.072	0	2	0	7	0	0.06	0	0.0996796	CG7208
CG7324	CG7324 OS=Drosophila melanogaster GN=CG7324 PE=1 SV=1	0	0	0	0	0	0	11	0	18	0	0.09	0	2	0	2	0	0.017	0	0.164341	CG7324
CG7347	ATR-interacting protein mus304 OS=Drosophila melanogaster GN=mus304 PE=1 SV=2	0	0	0	0	0	0	0	0	0	0	0	0	2	0	3	0	0.026	0	0.211325	CG7347
CG7358	CG7358 OS=Drosophila melanogaster GN=CG7358 PE=1 SV=1	2	0	2	0	0.023	0	0	2	0	5	0	0.011	2	0	3	0	0.015	0	0.259259	CG7358
CG7424	IP17351p OS=Drosophila melanogaster GN=RpL36A PE=1 SV=2	3	0	6	0	0.087	0	5	0	6	0	0.298	0	2	0	3	0	0.144	0	0.0317071	CG7424
CG7437	Mushroom-body expressed, isoform A OS=Drosophila melanogaster GN=mub PE=2 SV=1	0	0	0	0	0	0	4	0	6	0	0.135	0	2	0	4	0	0.057	0	0.112702	CG7437
CG7578	Sec71, isoform B OS=Drosophila melanogaster GN=sec71 PE=2 SV=1	0	0	0	0	0	0	4	0	4	0	0.024	0	2	0	2	0	0.009	0	0.112702	CG7578
CG7593	CG7593 OS=Drosophila melanogaster GN=CG7593 PE=2 SV=1	0	0	0	0	0	0	4	0	5	0	0.218	0	2	0	4	0	0.069	0	0.112702	CG7593
CG7611	WD repeat-containing protein 26 homolog OS=Drosophila melanogaster GN=CG7611 PE=1 SV=1	4	0	4	0	0.11	0	8	0	9	0	0.163	0	2	0	7	0	0.06	0	0.0590414	CG7611
CG7697	Cleavage stimulation factor 64 kilodalton subunit OS=Drosophila melanogaster GN=CstF-64 PE=1 SV=2	2	0	2	0	0.112	0	7	2	16	2	0.196	0.05	2	0	3	0	0.081	0	0.103063	CG7697
CG7803	Regulatory protein zeste OS=Drosophila melanogaster GN=z PE=1 SV=3	3	0	3	0	0.092	0	3	0	3	0	0.037	0	2	0	3	0	0.033	0	0.00763404	CG7803
CG7825	Rad17 OS=Drosophila melanogaster GN=Rad17 PE=2 SV=2	5	0	7	0	0.163	0	5	0	6	0	0.11	0	2	0	3	0	0.062	0	0.0285955	CG7825
CG7885	GH07456p OS=Drosophila melanogaster GN=RpII33 PE=1 SV=1	7	0	12	0	0.455	0	6	4	11	8	0.353	0.073	2	0	3	0	0.08	0	0.0730628	CG7885
CG7913	PP2A-B', isoform J OS=Drosophila melanogaster GN=PP2A-B' PE=4 SV=1	0	0	0	0	0	0	2	0	2	0	0.043	0	2	0	4	0	0.033	0	0.0917517	CG7913
CG7920	CG7920, isoform B OS=Drosophila melanogaster GN=CG7920 PE=2 SV=1	0	0	0	0	0	0	3	0	5	0	0.073	0	2	0	2	0	0.05	0	0.0996796	CG7920
CG7954	LD39308p OS=Drosophila melanogaster GN=stck PE=2 SV=1	0	0	0	0	0	0	2	0	2	0	0.072	0	2	0	4	0	0.072	0	0.0917517	CG7954
CG7957	Mediator of RNA polymerase II transcription subunit 17 OS=Drosophila melanogaster GN=MED17 PE=1 SV=1	2	0	2	0	0.061	0	6	3	9	3	0.146	0.026	2	0	4	0	0.059	0	0.119678	CG7957
CG8019	DNA excision repair protein haywire OS=Drosophila melanogaster GN=hay PE=2 SV=2	9	0	12	0	0.147	0	6	2	6	5	0.081	0.018	2	0	3	0	0.028	0	0.0607223	CG8019
CG8029	CG8029, isoform A OS=Drosophila melanogaster GN=VhaAC45 PE=1 SV=1	3	0	3	0	0.124	0	2	0	3	0	0.095	0	2	0	2	0	0.079	0	0.00990197	CG8029
CG8049	Isoform A of Tyrosine-protein kinase Btk29A OS=Drosophila melanogaster GN=Btk29A	5	0	5	0	0.106	0	10	0	15	0	0.156	0	2	0	2	0	0.053	0	0.0679207	CG8049
CG8079	CG8079, isoform A OS=Drosophila melanogaster GN=CG8079 PE=2 SV=1	2	0	3	0	0.065	0	4	0	4	0	0.033	0	2	0	3	0	0.06	0	0.0285955	CG8079
CG8086	CG8086, isoform E OS=Drosophila melanogaster GN=CG8086 PE=2 SV=2	0	0	0	0	0	0	0	0	0	0	0	0	2	0	2	0	0.018	0	0.211325	CG8086
CG8114	Pebble, isoform B OS=Drosophila melanogaster GN=pbl PE=2 SV=1	7	0	7	0	0.074	0	14	0	17	0	0.13	0	2	0	2	0	0.024	0	0.079237	CG8114
CG8165	CG8165 OS=Drosophila melanogaster GN=JHDM2 PE=1 SV=1	2	0	2	0	0.042	0	6	0	7	0	0.077	0	2	0	2	0	0.029	0	0.0648059	CG8165
CG8202	UPF0505 protein CG8202 OS=Drosophila melanogaster GN=CG8202 PE=2 SV=3	6	0	6	0	0.084	0	2	0	4	0	0.035	0	2	0	5	0	0.032	0	0.0648059	CG8202
CG8284	Ubiquitin-conjugating enzyme E2-22 kDa OS=Drosophila melanogaster GN=UbcD4 PE=1 SV=2	0	0	0	0	0	0	0	0	0	0	0	0	2	0	2	0	0.06	0	0.211325	CG8284
CG8325	Lethal (2) k14710 OS=Drosophila melanogaster GN=l(2)k14710 PE=1 SV=1	0	0	0	0	0	0	2	0	2	0	0.03	0	2	0	2	0	0.031	0	0.0917517	CG8325
CG8414	Polynucleotide 5'-hydroxyl-kinase NOL9 OS=Drosophila melanogaster GN=CG8414 PE=2 SV=1	7	0	10	0	0.101	0	2	0	3	0	0.019	0	2	0	3	0	0.031	0	0.0794045	CG8414
CG8777	CG8777 OS=Drosophila melanogaster GN=CG8777 PE=2 SV=1	2	0	2	0	0.048	0	0	0	0	0	0	0	2	0	2	0	0.015	0	0.0917517	CG8777
CG8886	LD03394p OS=Drosophila melanogaster GN=l(2)05714 PE=1 SV=3	4	0	6	0	0.188	0	0	0	0	0	0	0	2	0	2	0	0.069	0	0.112702	CG8886
CG8924	CG8924, isoform A OS=Drosophila melanogaster GN=CG8924 PE=1 SV=1	5	0	7	0	0.113	0	6	0	9	0	0.076	0	2	0	4	0	0.051	0	0.0345253	CG8924
CG8939	CG8939 OS=Drosophila melanogaster GN=CG8939 PE=1 SV=1	21	0	30	0	0.275	0	3	0	4	0	0.031	0	2	0	5	0	0.01	0	0.147747	CG8939
CG9054	ATP-dependent RNA helicase Ddx1 OS=Drosophila melanogaster GN=Ddx1 PE=2 SV=1	5	0	5	0	0.089	0	3	0	3	0	0.066	0	2	0	4	0	0.039	0	0.0317071	CG9054
CG9078	Des-1 protein OS=Drosophila melanogaster GN=ifc PE=2 SV=1	4	0	5	0	0.14	0	2	0	2	0	0.078	0	2	0	2	0	0.093	0	0.0285955	CG9078
CG9128	Phosphatidylinositide phosphatase SAC1 OS=Drosophila melanogaster GN=Sac1 PE=1 SV=1	0	0	0	0	0	0	7	0	8	0	0.108	0	2	0	3	0	0.047	0	0.143127	CG9128
CG9273	CG9273 protein OS=Drosophila melanogaster GN=RPA2 PE=1 SV=2	2	0	2	0	0.146	0	2	0	6	0	0.085	0	2	0	2	0	0.073	0	#DIV/0!	CG9273
CG9375	Ras-like protein 1 OS=Drosophila melanogaster GN=Ras85D PE=1 SV=2	5	0	6	0	0.354	0	0	0	0	0	0	0	2	0	3	0	0.116	0	0.124761	CG9375
CG9575	LD21953p OS=Drosophila melanogaster GN=Rab35 PE=2 SV=1	2	0	2	0	0.07	0	2	0	4	0	0.1	0	2	0	9	0	0.104	0	#DIV/0!	CG9575
CG9703	Abnormal X segregation OS=Drosophila melanogaster GN=Axs PE=2 SV=1	0	0	0	0	0	0	0	0	0	0	0	0	2	0	3	0	0.043	0	0.211325	CG9703
CG9834	Endophilin B OS=Drosophila melanogaster GN=endoB PE=2 SV=1	13	0	19	0	0.291	0	3	0	3	0	0.04	0	2	0	3	0	0.056	0	0.114836	CG9834
CG9874	TATA-box-binding protein OS=Drosophila melanogaster GN=Tbp PE=1 SV=1	3	0	4	0	0.076	0	7	2	10	2	0.388	0.054	2	0	4	0	0.02	0	0.0740656	CG9874
CG9885	Protein decapentaplegic OS=Drosophila melanogaster GN=dpp PE=1 SV=2	0	0	0	0	0	0	0	0	0	0	0	0	2	0	2	0	0.024	0	0.211325	CG9885
CG9945	AT18160p OS=Drosophila melanogaster GN=CG9945 PE=2 SV=1	0	0	0	0	0	0	3	0	3	0	0.045	0	2	0	3	0	0.031	0	0.0996796	CG9945
CG7993	Ribosome production factor 2 homolog OS=Drosophila melanogaster GN=CG7993 PE=2 SV=3	6	5	6	8	0.2	0.178	0	4	0	6	0	0.094	0	6	0	18	0	0.166	0.134648	CG7993
CG6090	FI02850p OS=Drosophila melanogaster GN=RpL34a PE=1 SV=2	8	3	15	6	0.259	0.154	6	3	12	6	0.216	0.093	0	5	0	17	0	0.179	0.361325	CG6090
CG6987	LD40489p OS=Drosophila melanogaster GN=SF2 PE=1 SV=1	3	0	4	0	0.176	0	0	0	0	0	0	0	0	5	0	32	0	0.149	0.376227	CG6987
CG9354	RH48056p OS=Drosophila melanogaster GN=RpL34b PE=1 SV=1	8	3	15	6	0.25	0.149	4	3	4	6	0.119	0.089	0	5	0	17	0	0.173	0.450391	CG9354
CG10333	CG10333 OS=Drosophila melanogaster GN=CG10333 PE=2 SV=2	12	0	14	0	0.124	0	4	4	5	7	0.044	0.035	0	4	0	13	0	0.041	0.269193	CG10333
CG12396	Ribosomal RNA processing protein 1 homolog OS=Drosophila melanogaster GN=Nnp-1 PE=1 SV=1	10	2	13	2	0.252	0.042	2	4	5	5	0.061	0.033	0	4	0	8	0	0.057	0.424697	CG12396
CG15293	CG15293 OS=Drosophila melanogaster GN=CG15293 PE=1 SV=1	3	0	3	0	0.156	0	5	5	8	5	0.213	0.174	0	4	0	10	0	0.069	0.441023	CG15293
CG17420	60S ribosomal protein L15 OS=Drosophila melanogaster GN=RpL15 PE=2 SV=1	0	2	0	3	0	0.103	2	0	2	0	0.093	0	0	4	0	15	0	0.123	0.193404	CG17420
CG10159	Boundary element associated factor OS=Drosophila melanogaster GN=BEAF-32 PE=1 SV=1	4	0	5	0	0.202	0	5	3	6	3	0.099	0.117	0	3	0	7	0	0.124	0.308687	CG10159
CG10473	Hook-like, isoform A OS=Drosophila melanogaster GN=Acn PE=1 SV=1	2	0	3	0	0.047	0	0	0	0	0	0	0	0	3	0	3	0	0.049	0.398585	CG10473
CG18600	CG18600 OS=Drosophila melanogaster GN=CG18600 PE=2 SV=1	2	0	3	0	0.057	0	3	2	4	4	0.086	0.055	0	3	0	5	0	0.068	0.5	CG18600
CG7830	CG7830 OS=Drosophila melanogaster GN=CG7830 PE=2 SV=1	2	0	3	0	0.088	0	2	5	2	6	0.061	0.091	0	3	0	6	0	0.055	0.234635	CG7830
CG17255	CG17255, isoform A OS=Drosophila melanogaster GN=nocte PE=1 SV=4	7	0	8	0	0.067	0	2	0	3	0	0.023	0	0	2	0	3	0	0.017	0.19051	CG17255
CG18616	CCR4-NOT transcription complex subunit 10 homolog OS=Drosophila melanogaster GN=CG18616 PE=1 SV=1	8	0	8	0	0.142	0	10	0	12	0	0.154	0	0	2	0	2	0	0.033	0.109629	CG18616
CG1908	CG1908 OS=Drosophila melanogaster GN=CG1908 PE=1 SV=1	7	0	11	0	0.216	0	2	3	2	5	0.07	0.047	0	2	0	10	0	0.047	0.300548	CG1908
CG2662	CG2662 OS=Drosophila melanogaster GN=EG:100G10.6 PE=1 SV=1	2	0	2	0	0.085	0	0	3	0	3	0	0.063	0	2	0	4	0	0.043	0.210198	CG2662
CG2859	Transcription initiation factor TFIID subunit 10 OS=Drosophila melanogaster GN=Taf10 PE=1 SV=2	3	0	4	0	0.198	0	0	0	0	0	0	0	0	2	0	2	0	0.108	0.398585	CG2859
CG31617;	Histone H1 OS=Drosophila melanogaster GN=His1 PE=1 SV=1	5	0	7	0	0.113	0	11	3	11	8	0.211	0.137	0	2	0	6	0	0.062	0.184419	CG31617;
CG31624	CG31624, isoform A OS=Drosophila melanogaster GN=CG31624 PE=2 SV=2	2	0	2	0	0.09	0	0	0	0	0	0	0	0	2	0	2	0	0.09	0.5	CG31624
CG31988	CG31988 OS=Drosophila melanogaster GN=CG17401 PE=2 SV=1	2	0	2	0	0.09	0	0	3	0	7	0	0.09	0	2	0	2	0	0.09	0.210198	CG31988
CG3201	Myosin-2 essential light chain OS=Drosophila melanogaster GN=Mlc-c PE=1 SV=1	2	0	2	0	0.17	0	0	2	0	8	0	0.088	0	2	0	6	0	0.088	0.259259	CG3201
CG33801	Histone H1 OS=Drosophila melanogaster GN=His1:CG33801 PE=3 SV=1	5	0	7	0	0.113	0	11	3	11	8	0.211	0.137	0	2	0	6	0	0.062	0.184419	CG33801
CG33807	Histone H1 OS=Drosophila melanogaster GN=His1:CG33807 PE=3 SV=1	5	0	7	0	0.113	0	11	3	11	8	0.211	0.137	0	2	0	6	0	0.062	0.184419	CG33807
CG33834	Histone H1 OS=Drosophila melanogaster GN=His1:CG33834 PE=3 SV=1	2	0	4	0	0.039	0	6	3	6	8	0.137	0.137	0	2	0	6	0	0.062	0.32383	CG33834
CG33855	Histone H1 OS=Drosophila melanogaster GN=His1:CG33858 PE=3 SV=1	5	0	7	0	0.113	0	11	3	11	8	0.211	0.137	0	2	0	6	0	0.062	0.184419	CG33855
CG34325	CG34325 OS=Drosophila melanogaster GN=CG18358 PE=4 SV=3	9	3	9	6	0.447	0.179	0	2	0	2	0	0.045	0	2	0	2	0	0.084	0.422629	CG34325
CG5499	Histone H2A.v OS=Drosophila melanogaster GN=His2Av PE=1 SV=2	5	3	35	5	0.348	0.206	5	2	6	2	0.291	0.071	0	2	0	20	0	0.135	0.305993	CG5499
CG5800	CG5800 OS=Drosophila melanogaster GN=CG5800 PE=1 SV=2	4	0	5	0	0.061	0	5	4	5	10	0.082	0.05	0	2	0	6	0	0.015	0.315514	CG5800
CG5915	CG5915 protein OS=Drosophila melanogaster GN=Rab7 PE=2 SV=1	2	0	2	0	0.053	0	4	2	4	2	0.101	0.048	0	2	0	2	0	0.101	0.324725	CG5915
CG10023	Focal adhesion kinase, isoform D OS=Drosophila melanogaster GN=Fak56D PE=4 SV=1	0	0	0	0	0	0	3	0	3	0	0.022	0	0	0	0	0	0	0	0.211325	CG10023
CG10033	cGMP-dependent protein kinase, isozyme 2 forms cD4/T1/T3A/T3B OS=Drosophila melanogaster GN=for PE=1 SV=3	5	0	6	0	0.067	0	0	0	0	0	0	0	0	0	0	0	0	0	0.211325	CG10033
CG10059	MAGE OS=Drosophila melanogaster GN=MAGE PE=1 SV=1	0	0	0	0	0	0	2	0	3	0	0.091	0	0	0	0	0	0	0	0.211325	CG10059
CG1009	Puromycin sensitive aminopeptidase, isoform A OS=Drosophila melanogaster GN=Psa PE=2 SV=1	0	0	0	0	0	0	3	0	3	0	0.039	0	0	0	0	0	0	0	0.211325	CG1009
CG10091	Glutathione S transferase D9 OS=Drosophila melanogaster GN=GstD9 PE=2 SV=1	0	0	0	0	0	0	2	0	4	0	0.096	0	0	0	0	0	0	0	0.211325	CG10091
CG10120	Malic enzyme OS=Drosophila melanogaster GN=Men PE=2 SV=1	0	0	0	0	0	0	6	0	6	0	0.12	0	0	0	0	0	0	0	0.211325	CG10120
CG10123	DNA topoisomerase 3-alpha OS=Drosophila melanogaster GN=Top3alpha PE=2 SV=2	2	0	2	0	0.014	0	0	0	0	0	0	0	0	0	0	0	0	0	0.211325	CG10123
CG10139	CG10139 OS=Drosophila melanogaster GN=CG10139 PE=1 SV=1	2	0	3	0	0.121	0	0	0	0	0	0	0	0	0	0	0	0	0	0.211325	CG10139
CG10153	CG10153 OS=Drosophila melanogaster GN=CG10153 PE=1 SV=1	3	0	3	0	0.247	0	0	0	0	0	0	0	0	0	0	0	0	0	0.211325	CG10153
CG10166	Probable dolichol-phosphate mannosyltransferase OS=Drosophila melanogaster GN=CG10166 PE=3 SV=1	0	0	0	0	0	0	4	0	5	0	0.141	0	0	0	0	0	0	0	0.211325	CG10166
CG10210	LD23303p OS=Drosophila melanogaster GN=tst PE=2 SV=2	2	0	2	0	0.016	0	5	0	6	0	0.048	0	0	0	0	0	0	0	0.124761	CG10210
CG10215	Ercc1 OS=Drosophila melanogaster GN=Ercc1 PE=1 SV=1	10	0	10	0	0.351	0	10	0	16	0	0.56	0	0	0	0	0	0	0	0.0917517	CG10215
CG10228	LD11480p OS=Drosophila melanogaster GN=Pcf11 PE=1 SV=2	0	0	0	0	0	0	2	0	2	0	0.039	0	0	0	0	0	0	0	0.211325	CG10228
CG10229	Katanin 60 OS=Drosophila melanogaster GN=katanin-60 PE=1 SV=2	2	0	2	0	0.066	0	3	0	3	0	0.1	0	0	0	0	0	0	0	0.0996796	CG10229
CG10238	Molybdopterin synthase catalytic subunit OS=Drosophila melanogaster GN=CG10238 PE=1 SV=2	0	0	0	0	0	0	2	0	2	0	0.076	0	0	0	0	0	0	0	0.211325	CG10238
CG1024	CG1024 OS=Drosophila melanogaster GN=CG1024 PE=1 SV=4	4	0	6	0	0.041	0	0	0	0	0	0	0	0	0	0	0	0	0	0.211325	CG1024
CG10240	Cytochrome P450 6a22 OS=Drosophila melanogaster GN=Cyp6a22 PE=1 SV=1	0	0	0	0	0	0	4	0	5	0	0.096	0	0	0	0	0	0	0	0.211325	CG10240
CG10248	Cytochrome P450 6a8 OS=Drosophila melanogaster GN=Cyp6a8 PE=2 SV=2	0	0	0	0	0	0	3	0	4	0	0.087	0	0	0	0	0	0	0	0.211325	CG10248
CG10260	CG10260 OS=Drosophila melanogaster GN=CG10260 PE=1 SV=2	0	0	0	0	0	0	5	0	6	0	0.024	0	0	0	0	0	0	0	0.211325	CG10260
CG10263	CG10263, isoform A OS=Drosophila melanogaster GN=Hakai PE=1 SV=2	0	0	0	0	0	0	3	0	4	0	0.089	0	0	0	0	0	0	0	0.211325	CG10263
CG10267	CG10267 OS=Drosophila melanogaster GN=CG10267 PE=1 SV=1	2	0	2	0	0.057	0	0	0	0	0	0	0	0	0	0	0	0	0	0.211325	CG10267
CG10272	Histone-lysine N-methyltransferase, H3 lysine-79 specific OS=Drosophila melanogaster GN=gpp PE=1 SV=2	0	0	0	0	0	0	2	0	2	0	0.015	0	0	0	0	0	0	0	0.211325	CG10272
CG10293	Protein held out wings OS=Drosophila melanogaster GN=how PE=1 SV=1	3	0	3	0	0.101	0	5	0	7	0	0.111	0	0	0	0	0	0	0	0.103941	CG10293
CG10321	CG10321 OS=Drosophila melanogaster GN=CG10321 PE=1 SV=1	3	0	3	0	0.028	0	0	0	0	0	0	0	0	0	0	0	0	0	0.211325	CG10321
CG10325	Homeobox protein abdominal-A OS=Drosophila melanogaster GN=abd-A PE=2 SV=2	2	0	4	0	0.049	0	0	0	0	0	0	0	0	0	0	0	0	0	0.211325	CG10325
CG10327	TBPH, isoform A OS=Drosophila melanogaster GN=TBPH PE=2 SV=2	0	0	0	0	0	0	2	0	2	0	0.042	0	0	0	0	0	0	0	0.211325	CG10327
CG10346	Grip71 OS=Drosophila melanogaster GN=Grip71 PE=1 SV=2	0	0	0	0	0	0	3	0	4	0	0.067	0	0	0	0	0	0	0	0.211325	CG10346
CG10347	CG10347, isoform A OS=Drosophila melanogaster GN=CG10347 PE=2 SV=1	0	0	0	0	0	0	2	0	2	0	0.053	0	0	0	0	0	0	0	0.211325	CG10347
CG10354	5'-3' exoribonuclease 2 homolog OS=Drosophila melanogaster GN=Rat1 PE=1 SV=2	3	0	3	0	0.062	0	7	3	10	3	0.081	0.028	0	0	0	0	0	0	0.189925	CG10354
CG10360	Protein ref(2)P OS=Drosophila melanogaster GN=ref(2)P PE=1 SV=2	0	0	0	0	0	0	4	0	10	0	0.075	0	0	0	0	0	0	0	0.211325	CG10360
CG10377	Heterogeneous nuclear ribonucleoprotein 27C OS=Drosophila melanogaster GN=Hrb27C PE=1 SV=2	2	0	4	0	0.062	0	0	0	0	0	0	0	0	0	0	0	0	0	0.211325	CG10377
CG10385	Protein male-specific lethal-1 OS=Drosophila melanogaster GN=msl-1 PE=1 SV=2	0	0	0	0	0	0	3	0	3	0	0.029	0	0	0	0	0	0	0	0.211325	CG10385
CG10395	CG10395 OS=Drosophila melanogaster GN=CG10395 PE=1 SV=1	3	0	3	0	0.121	0	0	0	0	0	0	0	0	0	0	0	0	0	0.211325	CG10395
CG10418	CG10418 OS=Drosophila melanogaster GN=CG10418 PE=1 SV=1	3	0	5	0	0.4	0	3	0	3	0	0.284	0	0	0	0	0	0	0	0.0917517	CG10418
CG10419	CG10419 OS=Drosophila melanogaster GN=Gem2 PE=1 SV=1	3	0	4	0	0.114	0	3	0	5	0	0.065	0	0	0	0	0	0	0	0.0917517	CG10419
CG10424	CG10424 OS=Drosophila melanogaster GN=CG10424 PE=1 SV=1	0	0	0	0	0	0	6	0	8	0	0.217	0	0	0	0	0	0	0	0.211325	CG10424
CG10425	CG10425 OS=Drosophila melanogaster GN=CG10425 PE=2 SV=1	0	0	0	0	0	0	4	2	5	3	0.14	0.039	0	0	0	0	0	0	0.342799	CG10425
CG10470	CG10470 OS=Drosophila melanogaster GN=CG10470 PE=1 SV=1	0	0	0	0	0	0	3	0	4	0	0.18	0	0	0	0	0	0	0	0.211325	CG10470
CG10496	CG10496 OS=Drosophila melanogaster GN=CG10496 PE=1 SV=1	3	0	3	0	0.062	0	4	0	5	0	0.072	0	0	0	0	0	0	0	0.0958548	CG10496
CG10575	Bifunctional phosphopantetheine adenylyltransferase-Dephospho-CoA kinase OS=Drosophila melanogaster GN=Ppat-Dpck PE=2 SV=2	3	0	3	0	0.104	0	0	0	0	0	0	0	0	0	0	0	0	0	0.211325	CG10575
CG10583	LD08709p OS=Drosophila melanogaster GN=Sse PE=2 SV=1	3	0	3	0	0.077	0	0	0	0	0	0	0	0	0	0	0	0	0	0.211325	CG10583
CG10590	CG10590 OS=Drosophila melanogaster GN=CG10590 PE=1 SV=2	0	0	0	0	0	0	3	0	4	0	0.064	0	0	0	0	0	0	0	0.211325	CG10590
CG10627	CG10627 OS=Drosophila melanogaster GN=CG10627 PE=1 SV=1	2	0	4	0	0.093	0	2	0	2	0	0.06	0	0	0	0	0	0	0	0.0917517	CG10627
CG10632	Sosondowah, isoform H OS=Drosophila melanogaster GN=sowah PE=4 SV=2	4	0	5	0	0.08	0	3	0	3	0	0.053	0	0	0	0	0	0	0	0.0958548	CG10632
CG10664	CG10664, isoform A OS=Drosophila melanogaster GN=CG10664 PE=1 SV=1	0	0	0	0	0	0	2	0	2	0	0.066	0	0	0	0	0	0	0	0.211325	CG10664
CG10686	GH08269p OS=Drosophila melanogaster GN=tral PE=1 SV=3	2	0	4	0	0.066	0	0	0	0	0	0	0	0	0	0	0	0	0	0.211325	CG10686
CG10688	Probable phosphomannomutase OS=Drosophila melanogaster GN=CG10688 PE=2 SV=1	2	0	2	0	0.071	0	0	0	0	0	0	0	0	0	0	0	0	0	0.211325	CG10688
CG10711	Vacuolar protein-sorting-associated protein 36 OS=Drosophila melanogaster GN=Vps36 PE=2 SV=2	3	0	4	0	0.135	0	7	0	9	0	0.19	0	0	0	0	0	0	0	0.120951	CG10711
CG10719	Brain tumor protein OS=Drosophila melanogaster GN=brat PE=1 SV=2	0	0	0	0	0	0	3	0	3	0	0.03	0	0	0	0	0	0	0	0.211325	CG10719
CG10732	CG10732, isoform A OS=Drosophila melanogaster GN=CG10732 PE=1 SV=2	0	0	0	0	0	0	2	0	2	0	0.014	0	0	0	0	0	0	0	0.211325	CG10732
CG10743	AT31531p OS=Drosophila melanogaster GN=Liprin-beta PE=1 SV=1	2	0	3	0	0.057	0	2	0	3	0	0.046	0	0	0	0	0	0	0	0.0917517	CG10743
CG10753	Probable small nuclear ribonucleoprotein Sm D1 OS=Drosophila melanogaster GN=SmD1 PE=1 SV=1	4	0	10	0	0.419	0	0	0	0	0	0	0	0	0	0	0	0	0	0.211325	CG10753
CG10756	RE52427p OS=Drosophila melanogaster GN=Taf13 PE=1 SV=1	0	0	0	0	0	0	2	0	2	0	0.184	0	0	0	0	0	0	0	0.211325	CG10756
CG10777	CG10777 OS=Drosophila melanogaster GN=CG10777 PE=2 SV=1	3	0	3	0	0.049	0	2	0	3	0	0.013	0	0	0	0	0	0	0	0.0996796	CG10777
CG1078	Fip1 OS=Drosophila melanogaster GN=Fip1 PE=1 SV=1	3	0	3	0	0.063	0	0	0	0	0	0	0	0	0	0	0	0	0	0.211325	CG1078
CG10802	CG10802 OS=Drosophila melanogaster GN=CG10802 PE=2 SV=2	0	0	0	0	0	0	2	0	2	0	0.055	0	0	0	0	0	0	0	0.211325	CG10802
CG10837	Eukaryotic initiation factor 4B OS=Drosophila melanogaster GN=eIF-4B PE=2 SV=1	2	0	2	0	0.108	0	0	0	0	0	0	0	0	0	0	0	0	0	0.211325	CG10837
CG10850	Imaginal discs arrested, isoform A OS=Drosophila melanogaster GN=ida PE=2 SV=2	0	0	0	0	0	0	10	0	14	0	0.13	0	0	0	0	0	0	0	0.211325	CG10850
CG1088	V-type proton ATPase subunit E OS=Drosophila melanogaster GN=Vha26 PE=1 SV=1	5	0	5	0	0.283	0	4	0	7	0	0.217	0	0	0	0	0	0	0	0.0942487	CG1088
CG10882	CG10882 OS=Drosophila melanogaster GN=gho PE=1 SV=2	3	0	4	0	0.029	0	0	0	0	0	0	0	0	0	0	0	0	0	0.211325	CG10882
CG10908	Derlin-1 OS=Drosophila melanogaster GN=CG10908 PE=2 SV=1	0	0	0	0	0	0	2	0	2	0	0.049	0	0	0	0	0	0	0	0.211325	CG10908
CG10923	Kinesin-like protein at 67A OS=Drosophila melanogaster GN=Klp67A PE=2 SV=1	8	0	8	0	0.152	0	7	0	12	0	0.092	0	0	0	0	0	0	0	0.0926559	CG10923
CG10984	CG10984, isoform A OS=Drosophila melanogaster GN=CG10984 PE=2 SV=1	7	0	8	0	0.228	0	2	0	2	0	0.034	0	0	0	0	0	0	0	0.143127	CG10984
CG10986	AP-3 complex subunit delta OS=Drosophila melanogaster GN=g PE=1 SV=4	2	0	2	0	0.032	0	0	0	0	0	0	0	0	0	0	0	0	0	0.211325	CG10986
CG11007	Thioredoxin-related transmembrane protein 2 homolog OS=Drosophila melanogaster GN=CG11007 PE=2 SV=1	0	0	0	0	0	0	3	0	4	0	0.122	0	0	0	0	0	0	0	0.211325	CG11007
CG1101	Aly OS=Drosophila melanogaster GN=Aly PE=1 SV=1	0	2	0	4	0	0.102	2	0	3	0	0.045	0	0	0	0	0	0	0	0.5	CG1101
CG1102	Melanization protease 1, isoform C OS=Drosophila melanogaster GN=MP1 PE=3 SV=1	0	0	0	0	0	0	2	0	2	0	0.055	0	0	0	0	0	0	0	0.211325	CG1102
CG11027	ADP-ribosylation factor 2 OS=Drosophila melanogaster GN=Arf102F PE=1 SV=2	7	0	11	0	0.472	0	0	0	0	0	0	0	0	0	0	0	0	0	0.211325	CG11027
CG1104	E3 UFM1-protein ligase 1 homolog OS=Drosophila melanogaster GN=CG1104 PE=1 SV=1	3	0	3	0	0.098	0	0	0	0	0	0	0	0	0	0	0	0	0	0.211325	CG1104
CG11070	BcDNA.LD34475 OS=Drosophila melanogaster GN=BcDNA.LD34475 PE=2 SV=1	0	0	0	0	0	0	2	0	2	0	0.025	0	0	0	0	0	0	0	0.211325	CG11070
CG11120	CG11120, isoform B OS=Drosophila melanogaster GN=CG11120 PE=1 SV=2	2	0	2	0	0.014	0	2	0	2	0	0.051	0	0	0	0	0	0	0	0.0917517	CG11120
CG11133	CG11133 OS=Drosophila melanogaster GN=CG11133-RA PE=1 SV=1	0	0	0	0	0	0	3	0	3	0	0.032	0	0	0	0	0	0	0	0.211325	CG11133
CG11156	Mutagen-sensitive 101 OS=Drosophila melanogaster GN=mus101 PE=2 SV=1	0	0	0	0	0	0	4	0	7	0	0.044	0	0	0	0	0	0	0	0.211325	CG11156
CG11181	Protein cup OS=Drosophila melanogaster GN=cup PE=1 SV=3	0	0	0	0	0	0	2	0	2	0	0.02	0	0	0	0	0	0	0	0.211325	CG11181
CG11184	Upf3 OS=Drosophila melanogaster GN=Upf3 PE=1 SV=2	0	0	0	0	0	0	3	0	4	0	0.11	0	0	0	0	0	0	0	0.211325	CG11184
CG11190	CG11190 OS=Drosophila melanogaster GN=CG11190 PE=1 SV=1	2	0	2	0	0.035	0	7	0	9	0	0.074	0	0	0	0	0	0	0	0.143127	CG11190
CG11207	Fascetto OS=Drosophila melanogaster GN=feo PE=1 SV=1	3	0	5	0	0.098	0	0	0	0	0	0	0	0	0	0	0	0	0	0.211325	CG11207
CG11259	LD45758p OS=Drosophila melanogaster GN=MICAL-like PE=1 SV=2	2	0	2	0	0.027	0	0	0	0	0	0	0	0	0	0	0	0	0	0.211325	CG11259
CG11265	Trf4-1, isoform F OS=Drosophila melanogaster GN=Trf4-1 PE=4 SV=1	0	0	0	0	0	0	3	0	3	0	0.021	0	0	0	0	0	0	0	0.211325	CG11265
CG11268	Isoprenylcysteine carboxylmethyltransferase OS=Drosophila melanogaster GN=ste14 PE=1 SV=1	0	0	0	0	0	0	2	0	4	0	0.064	0	0	0	0	0	0	0	0.211325	CG11268
CG1129	Mannose-1-phosphate guanyltransferase beta OS=Drosophila melanogaster GN=CG1129 PE=1 SV=1	0	0	0	0	0	0	2	0	3	0	0.122	0	0	0	0	0	0	0	0.211325	CG1129
CG11295	Isoform 2 of Protein lethal(2)denticleless OS=Drosophila melanogaster GN=l(2)dtl	3	0	3	0	0.069	0	3	0	6	0	0.055	0	0	0	0	0	0	0	0.0917517	CG11295
CG11299	Sestrin homolog OS=Drosophila melanogaster GN=CG11299 PE=1 SV=2	2	0	2	0	0.076	0	3	0	4	0	0.093	0	0	0	0	0	0	0	0.0996796	CG11299
CG11301	IP14609p OS=Drosophila melanogaster GN=Mes4 PE=1 SV=1	0	0	0	0	0	0	2	0	2	0	0.123	0	0	0	0	0	0	0	0.211325	CG11301
CG11306	CG11306 OS=Drosophila melanogaster GN=CG11306 PE=2 SV=2	0	0	0	0	0	0	3	0	4	0	0.048	0	0	0	0	0	0	0	0.211325	CG11306
CG11371	BcDNA.LD26519 OS=Drosophila melanogaster GN=dbr PE=1 SV=1	5	0	6	0	0.11	0	0	0	0	0	0	0	0	0	0	0	0	0	0.211325	CG11371
CG11377	CG11377 OS=Drosophila melanogaster GN=CG11377 PE=1 SV=1	0	0	0	0	0	0	3	0	4	0	0.091	0	0	0	0	0	0	0	0.211325	CG11377
CG11403	CG11403 OS=Drosophila melanogaster GN=EG:33C11.2 PE=1 SV=1	3	0	4	0	0.088	0	0	0	0	0	0	0	0	0	0	0	0	0	0.211325	CG11403
CG11482	Mlh1 OS=Drosophila melanogaster GN=Mlh1 PE=4 SV=1	0	0	0	0	0	0	4	0	5	0	0.057	0	0	0	0	0	0	0	0.211325	CG11482
CG11490	CG11490 OS=Drosophila melanogaster GN=CG11490 PE=1 SV=1	0	0	0	0	0	0	5	0	5	0	0.095	0	0	0	0	0	0	0	0.211325	CG11490
CG11526	AT20596p OS=Drosophila melanogaster GN=CG11526 PE=1 SV=1	2	0	2	0	0.042	0	0	0	0	0	0	0	0	0	0	0	0	0	0.211325	CG11526
CG11534	Differentially expressed in FDCP 8 homolog OS=Drosophila melanogaster GN=CG11534 PE=1 SV=1	0	0	0	0	0	0	4	0	4	0	0.087	0	0	0	0	0	0	0	0.211325	CG11534
CG11555	CG11555 OS=Drosophila melanogaster GN=CG11555 PE=1 SV=1	3	0	3	0	0.145	0	0	0	0	0	0	0	0	0	0	0	0	0	0.211325	CG11555
CG11563	CG11563 OS=Drosophila melanogaster GN=CG11563 PE=4 SV=2	0	0	0	0	0	0	2	0	2	0	0.101	0	0	0	0	0	0	0	0.211325	CG11563
CG11567	NADPH--cytochrome P450 reductase OS=Drosophila melanogaster GN=Cpr PE=2 SV=2	10	0	13	0	0.196	0	0	0	0	0	0	0	0	0	0	0	0	0	0.211325	CG11567
CG11583	Ribosome biogenesis protein BRX1 homolog OS=Drosophila melanogaster GN=CG11583 PE=2 SV=2	4	0	6	0	0.142	0	0	0	0	0	0	0	0	0	0	0	0	0	0.211325	CG11583
CG11593	CG11593 OS=Drosophila melanogaster GN=CG11593 PE=2 SV=3	0	0	0	0	0	0	5	0	5	0	0.105	0	0	0	0	0	0	0	0.211325	CG11593
CG11606	GH06023p OS=Drosophila melanogaster GN=Rpp30 PE=1 SV=1	2	0	3	0	0.04	0	0	0	0	0	0	0	0	0	0	0	0	0	0.211325	CG11606
CG11654	Adenosylhomocysteinase OS=Drosophila melanogaster GN=Ahcy13 PE=1 SV=2	2	0	5	0	0.088	0	0	0	0	0	0	0	0	0	0	0	0	0	0.211325	CG11654
CG11660	Serine/threonine-protein kinase RIO1 OS=Drosophila melanogaster GN=CG11660 PE=2 SV=1	2	0	4	0	0.056	0	0	0	0	0	0	0	0	0	0	0	0	0	0.211325	CG11660
CG11680	Dosage compensation regulator OS=Drosophila melanogaster GN=mle PE=1 SV=2	0	0	0	0	0	0	2	0	2	0	0.014	0	0	0	0	0	0	0	0.211325	CG11680
CG11710	CG11710, isoform B OS=Drosophila melanogaster GN=CG11710 PE=2 SV=1	2	0	3	0	0.076	0	0	0	0	0	0	0	0	0	0	0	0	0	0.211325	CG11710
CG11727	TBC1 domain family member CG11727 OS=Drosophila melanogaster GN=CG11727 PE=1 SV=3	0	0	0	0	0	0	2	0	2	0	0.02	0	0	0	0	0	0	0	0.211325	CG11727
CG11738	RNA-binding protein pno1 OS=Drosophila melanogaster GN=l(1)G0004 PE=1 SV=1	6	0	9	0	0.35	0	6	0	8	0	0.242	0	0	0	0	0	0	0	0.0917517	CG11738
CG11784	CG11784 OS=Drosophila melanogaster GN=CG11784 PE=2 SV=1	8	0	8	0	0.217	0	2	0	2	0	0.088	0	0	0	0	0	0	0	0.14993	CG11784
CG11790	CG11790, isoform A OS=Drosophila melanogaster GN=CG11790 PE=1 SV=1	2	0	3	0	0.136	0	0	0	0	0	0	0	0	0	0	0	0	0	0.211325	CG11790
CG11804	PTB domain-containing adapter protein ced-6 OS=Drosophila melanogaster GN=ced-6 PE=1 SV=1	2	0	2	0	0.031	0	5	0	5	0	0.103	0	0	0	0	0	0	0	0.124761	CG11804
CG11837	Probable dimethyladenosine transferase OS=Drosophila melanogaster GN=CG11837 PE=2 SV=1	8	0	12	0	0.255	0	10	0	18	0	0.314	0	0	0	0	0	0	0	0.0942487	CG11837
CG11873	CG11873 OS=Drosophila melanogaster GN=CG11873 PE=1 SV=2	2	0	3	0	0.012	0	0	0	0	0	0	0	0	0	0	0	0	0	0.211325	CG11873
CG11889	CG11889 OS=Drosophila melanogaster GN=CG11889 PE=1 SV=2	2	0	2	0	0.091	0	0	0	0	0	0	0	0	0	0	0	0	0	0.211325	CG11889
CG11919	CG11919, isoform A OS=Drosophila melanogaster GN=CG11919 PE=1 SV=1	0	0	0	0	0	0	4	0	7	0	0.045	0	0	0	0	0	0	0	0.211325	CG11919
CG11920	CG11920 OS=Drosophila melanogaster GN=CG11920-RA PE=1 SV=1	11	0	12	0	0.275	0	6	0	10	0	0.211	0	0	0	0	0	0	0	0.108341	CG11920
CG11949	Isoform 2 of Protein 4.1 homolog OS=Drosophila melanogaster GN=cora	3	0	3	0	0.068	0	8	8	8	13	0.092	0.1	0	0	0	0	0	0	0.396006	CG11949
CG11968	GH04846p OS=Drosophila melanogaster GN=RagA PE=1 SV=1	2	0	2	0	0.064	0	7	0	8	0	0.129	0	0	0	0	0	0	0	0.143127	CG11968
CG11970	BcDNA.LD23876 OS=Drosophila melanogaster GN=BcDNA.LD23876 PE=1 SV=1	0	0	0	0	0	0	7	0	8	0	0.065	0	0	0	0	0	0	0	0.211325	CG11970
CG11987	Aryl hydrocarbon receptor nuclear translocator homolog OS=Drosophila melanogaster GN=tgo PE=1 SV=2	2	0	2	0	0.059	0	0	0	0	0	0	0	0	0	0	0	0	0	0.211325	CG11987
CG12010	CG12010, isoform A OS=Drosophila melanogaster GN=CG12010 PE=1 SV=1	0	0	0	0	0	0	4	2	4	4	0.042	0.015	0	0	0	0	0	0	0.342799	CG12010
CG12030	Probable UDP-glucose 4-epimerase OS=Drosophila melanogaster GN=CG12030 PE=1 SV=1	3	0	4	0	0.103	0	3	0	4	0	0.054	0	0	0	0	0	0	0	0.0917517	CG12030
CG12070	Saposin-related, isoform B OS=Drosophila melanogaster GN=Sap-r PE=2 SV=2	2	0	2	0	0.048	0	0	0	0	0	0	0	0	0	0	0	0	0	0.211325	CG12070
CG12072	Serine/threonine-protein kinase Warts OS=Drosophila melanogaster GN=wts PE=1 SV=1	2	0	2	0	0.021	0	3	0	4	0	0.034	0	0	0	0	0	0	0	0.0996796	CG12072
CG12082	Ubiquitin carboxyl-terminal hydrolase OS=Drosophila melanogaster GN=CG12082 PE=1 SV=1	0	0	0	0	0	0	2	0	2	0	0.017	0	0	0	0	0	0	0	0.211325	CG12082
CG12085	Poly(U)-binding-splicing factor half pint OS=Drosophila melanogaster GN=pUf68 PE=1 SV=2	10	3	10	11	0.237	0.049	9	0	14	0	0.157	0	0	0	0	0	0	0	0.115115	CG12085
CG12090	CG12090, isoform A OS=Drosophila melanogaster GN=CG12090 PE=2 SV=2	0	0	0	0	0	0	3	0	3	0	0.019	0	0	0	0	0	0	0	0.211325	CG12090
CG1210	Isoform 2 of 3-phosphoinositide-dependent protein kinase 1 OS=Drosophila melanogaster GN=Pk61C	2	0	3	0	0.066	0	3	0	3	0	0.04	0	0	0	0	0	0	0	0.0996796	CG1210
CG12104	CG12104 OS=Drosophila melanogaster GN=CG12104 PE=2 SV=1	2	0	4	0	0.228	0	0	0	0	0	0	0	0	0	0	0	0	0	0.211325	CG12104
CG12106	CG12106 OS=Drosophila melanogaster GN=CG12106 PE=1 SV=1	2	0	2	0	0.09	0	2	0	5	0	0.142	0	0	0	0	0	0	0	0.0917517	CG12106
CG12109	Caf1-180 OS=Drosophila melanogaster GN=Caf1-180 PE=2 SV=1	4	0	6	0	0.058	0	3	0	4	0	0.025	0	0	0	0	0	0	0	0.0958548	CG12109
CG12117	CG12117-PA OS=Drosophila melanogaster GN=Sptr PE=2 SV=1	0	0	0	0	0	0	2	0	2	0	0.153	0	0	0	0	0	0	0	0.211325	CG12117
CG12121	CG12121 OS=Drosophila melanogaster GN=CG12121 PE=2 SV=1	2	0	2	0	0.046	0	0	0	0	0	0	0	0	0	0	0	0	0	0.211325	CG12121
CG12128	CG12128, isoform B OS=Drosophila melanogaster GN=CG12128 PE=4 SV=1	0	0	0	0	0	0	2	0	2	0	0.084	0	0	0	0	0	0	0	0.211325	CG12128
CG12129	CG12129 OS=Drosophila melanogaster GN=CG12129 PE=1 SV=1	0	0	0	0	0	0	3	0	3	0	0.08	0	0	0	0	0	0	0	0.211325	CG12129
CG12130	Peptidyl-alpha-hydroxyglycine alpha-amidating lyase 1 OS=Drosophila melanogaster GN=Pal1 PE=1 SV=1	0	0	0	0	0	0	2	0	2	0	0.039	0	0	0	0	0	0	0	0.211325	CG12130
CG12163	Putative cysteine proteinase CG12163 OS=Drosophila melanogaster GN=CG12163 PE=2 SV=2	2	0	3	0	0.065	0	0	0	0	0	0	0	0	0	0	0	0	0	0.211325	CG12163
CG12165	Inner centromere protein OS=Drosophila melanogaster GN=Incenp PE=1 SV=1	4	0	5	0	0.083	0	2	0	3	0	0.044	0	0	0	0	0	0	0	0.112702	CG12165
CG12171	CG12171 OS=Drosophila melanogaster GN=CG12171 PE=1 SV=1	0	0	0	0	0	0	3	0	3	0	0.097	0	0	0	0	0	0	0	0.211325	CG12171
CG12175	SD08423p OS=Drosophila melanogaster GN=tth PE=2 SV=1	0	0	0	0	0	0	2	0	2	0	0.051	0	0	0	0	0	0	0	0.211325	CG12175
CG12177	CG12177 OS=Drosophila melanogaster GN=CG12177 PE=2 SV=1	2	0	2	0	0.119	0	0	0	0	0	0	0	0	0	0	0	0	0	0.211325	CG12177
CG1218	UPF0609 protein CG1218 OS=Drosophila melanogaster GN=CG1218 PE=1 SV=2	0	0	0	0	0	0	3	0	4	0	0.076	0	0	0	0	0	0	0	0.211325	CG1218
CG12182	CG12182 OS=Drosophila melanogaster GN=CG12182-RA PE=1 SV=1	0	0	0	0	0	0	4	0	5	0	0.082	0	0	0	0	0	0	0	0.211325	CG12182
CG12192	Klp59D OS=Drosophila melanogaster GN=Klp59D PE=2 SV=2	0	0	0	0	0	0	2	0	2	0	0.014	0	0	0	0	0	0	0	0.211325	CG12192
CG12203	CG12203 OS=Drosophila melanogaster GN=CG12203 PE=1 SV=2	0	0	0	0	0	0	3	0	8	0	0.18	0	0	0	0	0	0	0	0.211325	CG12203
CG12254	Mediator of RNA polymerase II transcription subunit 25 OS=Drosophila melanogaster GN=MED25 PE=2 SV=1	2	0	2	0	0.035	0	5	0	5	0	0.09	0	0	0	0	0	0	0	0.124761	CG12254
CG12261	GH07821p OS=Drosophila melanogaster GN=mRpS22 PE=1 SV=1	3	0	3	0	0.109	0	0	0	0	0	0	0	0	0	0	0	0	0	0.211325	CG12261
CG12263	CG12263 OS=Drosophila melanogaster GN=CG12263 PE=4 SV=1	0	0	0	0	0	0	4	0	4	0	0.055	0	0	0	0	0	0	0	0.211325	CG12263
CG12267	CG12267 OS=Drosophila melanogaster GN=CG12267 PE=2 SV=2	2	0	2	0	0.061	0	0	0	0	0	0	0	0	0	0	0	0	0	0.211325	CG12267
CG1227	CG1227 OS=Drosophila melanogaster GN=CG1227 PE=2 SV=1	3	0	4	0	0.212	0	0	0	0	0	0	0	0	0	0	0	0	0	0.211325	CG1227
CG12272	CG12272, isoform B OS=Drosophila melanogaster GN=CG12272-RA PE=2 SV=1	3	0	5	0	0.048	0	0	0	0	0	0	0	0	0	0	0	0	0	0.211325	CG12272
CG12275	40S ribosomal protein S10a OS=Drosophila melanogaster GN=RpS10a PE=2 SV=1	2	0	2	0	0.092	0	4	0	6	0	0.092	0	0	0	0	0	0	0	0.112702	CG12275
CG12301	CG12301 OS=Drosophila melanogaster GN=CG12301 PE=1 SV=2	0	0	0	0	0	0	2	0	2	0	0.029	0	0	0	0	0	0	0	0.211325	CG12301
CG12316	CG12316, isoform A OS=Drosophila melanogaster GN=CG12316 PE=2 SV=1	0	0	0	0	0	0	2	0	2	0	0.013	0	0	0	0	0	0	0	0.211325	CG12316
CG12320	CG12320 OS=Drosophila melanogaster GN=CG12320 PE=2 SV=1	3	0	3	0	0.061	0	2	0	3	0	0.05	0	0	0	0	0	0	0	0.0996796	CG12320
CG12325	CG12325 OS=Drosophila melanogaster GN=CG12325 PE=1 SV=1	4	0	8	0	0.054	0	0	0	0	0	0	0	0	0	0	0	0	0	0.211325	CG12325
CG1234	Nucleolar complex protein 3 homolog OS=Drosophila melanogaster GN=CG1234 PE=1 SV=1	5	0	6	0	0.074	0	0	0	0	0	0	0	0	0	0	0	0	0	0.211325	CG1234
CG12346	Cag OS=Drosophila melanogaster GN=cag PE=1 SV=1	2	0	2	0	0.236	0	0	0	0	0	0	0	0	0	0	0	0	0	0.211325	CG12346
CG12390	NADPH:adrenodoxin oxidoreductase, mitochondrial OS=Drosophila melanogaster GN=dare PE=2 SV=1	0	0	0	0	0	0	2	0	3	0	0.041	0	0	0	0	0	0	0	0.211325	CG12390
CG12399	Protein mothers against dpp OS=Drosophila melanogaster GN=Mad PE=1 SV=1	0	0	0	0	0	0	4	0	5	0	0.095	0	0	0	0	0	0	0	0.211325	CG12399
CG12403	V-type proton ATPase catalytic subunit A isoform 1 OS=Drosophila melanogaster GN=Vha68-1 PE=2 SV=2	8	0	10	0	0.205	0	9	0	13	0	0.142	0	0	0	0	0	0	0	0.0924562	CG12403
CG12449	Glutamine:fructose-6-phosphate aminotransferase 1, isoform J OS=Drosophila melanogaster GN=Gfat1 PE=4 SV=1	2	0	2	0	0.076	0	0	0	0	0	0	0	0	0	0	0	0	0	0.211325	CG12449
CG1245	Mediator of RNA polymerase II transcription subunit 27 OS=Drosophila melanogaster GN=MED27 PE=1 SV=1	3	0	3	0	0.119	0	2	0	2	0	0.068	0	0	0	0	0	0	0	0.0996796	CG1245
CG12529	Isoform B of Glucose-6-phosphate 1-dehydrogenase OS=Drosophila melanogaster GN=Zw	0	0	0	0	0	0	4	0	4	0	0.088	0	0	0	0	0	0	0	0.211325	CG12529
CG12547	CG12547 OS=Drosophila melanogaster GN=CG12547 PE=2 SV=2	0	0	0	0	0	0	5	0	7	0	0.091	0	0	0	0	0	0	0	0.211325	CG12547
CG12592	Slender lobes-like protein OS=Drosophila melanogaster GN=CG12592 PE=1 SV=3	4	0	4	0	0.062	0	0	0	0	0	0	0	0	0	0	0	0	0	0.211325	CG12592
CG12659	CG12659 OS=Drosophila melanogaster GN=CG12659 PE=2 SV=2	3	0	4	0	0.382	0	0	0	0	0	0	0	0	0	0	0	0	0	0.211325	CG12659
CG12690	Checkpoint suppressor homologue, isoform A OS=Drosophila melanogaster GN=CHES-1-like PE=2 SV=4	0	0	0	0	0	0	2	0	2	0	0.016	0	0	0	0	0	0	0	0.211325	CG12690
CG12717	CG12717 OS=Drosophila melanogaster GN=CG12717-RA PE=1 SV=3	2	0	2	0	0.088	0	0	0	0	0	0	0	0	0	0	0	0	0	0.211325	CG12717
CG12734	CG12734, isoform A OS=Drosophila melanogaster GN=Girdin PE=1 SV=1	0	0	0	0	0	0	3	0	3	0	0.02	0	0	0	0	0	0	0	0.211325	CG12734
CG12755	Protein lethal(3)malignant blood neoplasm 1 OS=Drosophila melanogaster GN=l(3)mbn PE=2 SV=2	0	0	0	0	0	0	2	0	2	0	0.051	0	0	0	0	0	0	0	0.211325	CG12755
CG12756	Eaf6 OS=Drosophila melanogaster GN=Eaf6 PE=1 SV=1	5	0	8	0	0.387	0	0	0	0	0	0	0	0	0	0	0	0	0	0.211325	CG12756
CG12792	Lethal (2) 09851 OS=Drosophila melanogaster GN=l(2)09851 PE=2 SV=1	12	0	17	0	0.395	0	3	0	5	0	0.154	0	0	0	0	0	0	0	0.14993	CG12792
CG12864	Su(Var)2-HP2, isoform A OS=Drosophila melanogaster GN=Su(var)2-HP2 PE=4 SV=1	3	0	3	0	0.024	0	3	0	3	0	0.012	0	0	0	0	0	0	0	0.0917517	CG12864
CG12892	Caf1-105 OS=Drosophila melanogaster GN=Caf1-105 PE=1 SV=1	0	0	0	0	0	0	3	2	3	6	0.064	0.023	0	0	0	0	0	0	0.398585	CG12892
CG1291	CG1291 OS=Drosophila melanogaster GN=CG1291 PE=2 SV=1	0	0	0	0	0	0	5	0	6	0	0.123	0	0	0	0	0	0	0	0.211325	CG1291
CG12948	CG12948 OS=Drosophila melanogaster GN=CG12948 PE=2 SV=1	2	0	3	0	0.206	0	0	0	0	0	0	0	0	0	0	0	0	0	0.211325	CG12948
CG13001	CG13001 OS=Drosophila melanogaster GN=CG13001 PE=1 SV=1	2	0	2	0	0.024	0	0	0	0	0	0	0	0	0	0	0	0	0	0.211325	CG13001
CG1307	Probable peptidyl-tRNA hydrolase 2 OS=Drosophila melanogaster GN=CG1307 PE=1 SV=2	2	0	2	0	0.081	0	5	0	7	0	0.258	0	0	0	0	0	0	0	0.124761	CG1307
CG13097	CG13097 OS=Drosophila melanogaster GN=CG13097 PE=1 SV=1	5	0	8	0	0.15	0	0	0	0	0	0	0	0	0	0	0	0	0	0.211325	CG13097
CG13176	WAS protein family homolog 1 OS=Drosophila melanogaster GN=wash PE=1 SV=1	2	0	2	0	0.054	0	2	0	2	0	0.038	0	0	0	0	0	0	0	0.0917517	CG13176
CG13197	CG13197 OS=Drosophila melanogaster GN=CG13197 PE=1 SV=1	2	0	2	0	0.102	0	0	2	0	8	0	0.052	0	0	0	0	0	0	0.5	CG13197
CG13201	Mediator of RNA polymerase II transcription subunit 29 OS=Drosophila melanogaster GN=ix PE=1 SV=1	2	0	3	0	0.09	0	2	0	2	0	0.09	0	0	0	0	0	0	0	0.0917517	CG13201
CG13279	Cytochrome b5-related protein OS=Drosophila melanogaster GN=Cyt-b5-r PE=1 SV=2	0	0	0	0	0	0	3	0	3	0	0.071	0	0	0	0	0	0	0	0.211325	CG13279
CG1332	CG1332 OS=Drosophila melanogaster GN=CG1332 PE=1 SV=2	0	0	0	0	0	0	4	0	4	0	0.059	0	0	0	0	0	0	0	0.211325	CG1332
CG13367	CG13367 OS=Drosophila melanogaster GN=EG:115C2.8 PE=2 SV=2	2	0	3	0	0.074	0	0	0	0	0	0	0	0	0	0	0	0	0	0.211325	CG13367
CG13379	SAGA-associated factor 11 homolog OS=Drosophila melanogaster GN=Sgf11 PE=1 SV=2	0	0	0	0	0	0	3	0	3	0	0.189	0	0	0	0	0	0	0	0.211325	CG13379
CG13383	COP9 signalosome complex subunit 8 OS=Drosophila melanogaster GN=CSN8 PE=1 SV=1	5	0	9	0	0.33	0	0	0	0	0	0	0	0	0	0	0	0	0	0.211325	CG13383
CG13399	Chrac-14, isoform A OS=Drosophila melanogaster GN=Chrac-14 PE=1 SV=1	3	0	5	0	0.359	0	0	0	0	0	0	0	0	0	0	0	0	0	0.211325	CG13399
CG1344	CG1344 OS=Drosophila melanogaster GN=CG1344 PE=1 SV=1	2	0	2	0	0.069	0	4	0	8	0	0.072	0	0	0	0	0	0	0	0.112702	CG1344
CG13472	CG13472 OS=Drosophila melanogaster GN=CG13472 PE=1 SV=1	0	0	0	0	0	0	2	0	2	0	0.03	0	0	0	0	0	0	0	0.211325	CG13472
CG13570	Spaghetti OS=Drosophila melanogaster GN=spag PE=1 SV=1	0	0	0	0	0	0	2	0	2	0	0.045	0	0	0	0	0	0	0	0.211325	CG13570
CG13626	LD37002p OS=Drosophila melanogaster GN=Syx18 PE=1 SV=1	0	0	0	0	0	0	3	0	6	0	0.084	0	0	0	0	0	0	0	0.211325	CG13626
CG1372	Isoform A of Putative vitellogenin receptor OS=Drosophila melanogaster GN=yl	0	0	0	0	0	0	3	0	3	0	0.019	0	0	0	0	0	0	0	0.211325	CG1372
CG13745	CG13745 OS=Drosophila melanogaster GN=FANCI PE=1 SV=2	5	0	5	0	0.089	0	4	0	5	0	0.038	0	0	0	0	0	0	0	0.0942487	CG13745
CG13746	MrgBP OS=Drosophila melanogaster GN=MrgBP PE=1 SV=1	2	0	2	0	0.159	0	0	2	0	2	0	0.065	0	0	0	0	0	0	0.5	CG13746
CG13773	CG13773 OS=Drosophila melanogaster GN=CG13773 PE=2 SV=1	3	0	3	0	0.221	0	2	0	3	0	0.075	0	0	0	0	0	0	0	0.0996796	CG13773
CG13779	Probable 26S proteasome complex subunit sem1 OS=Drosophila melanogaster GN=CG13779 PE=1 SV=1	0	0	0	0	0	0	3	0	5	0	0.367	0	0	0	0	0	0	0	0.211325	CG13779
CG1381	CG1381 OS=Drosophila melanogaster GN=RpLP0-like PE=2 SV=1	4	0	5	0	0.168	0	3	0	3	0	0.07	0	0	0	0	0	0	0	0.0958548	CG1381
CG13852	Mps one binder kinase activator-like 1 OS=Drosophila melanogaster GN=mats PE=1 SV=1	2	0	2	0	0.155	0	2	0	2	0	0.096	0	0	0	0	0	0	0	0.0917517	CG13852
CG13879	Wee augmin, isoform B OS=Drosophila melanogaster GN=wac PE=1 SV=2	2	0	2	0	0.166	0	0	0	0	0	0	0	0	0	0	0	0	0	0.211325	CG13879
CG13914	Mitotic spindle density 1 OS=Drosophila melanogaster GN=msd1 PE=2 SV=2	0	0	0	0	0	0	3	2	3	2	0.225	0.094	0	0	0	0	0	0	0.398585	CG13914
CG13957	WASH complex subunit 7 homolog OS=Drosophila melanogaster GN=CG13957 PE=1 SV=1	2	0	2	0	0.044	0	0	0	0	0	0	0	0	0	0	0	0	0	0.211325	CG13957
CG14005	CG14005 OS=Drosophila melanogaster GN=CG14005 PE=2 SV=1	0	0	0	0	0	0	3	0	3	0	0.101	0	0	0	0	0	0	0	0.211325	CG14005
CG14023	CG14023, isoform A OS=Drosophila melanogaster GN=CG14023 PE=1 SV=3	3	0	3	0	0.026	0	0	0	0	0	0	0	0	0	0	0	0	0	0.211325	CG14023
CG14030	Bub1 homologue OS=Drosophila melanogaster GN=Bub1 PE=1 SV=1	3	0	5	0	0.05	0	0	0	0	0	0	0	0	0	0	0	0	0	0.211325	CG14030
CG14043	Protein KBP homolog OS=Drosophila melanogaster GN=CG14043 PE=1 SV=1	9	0	9	0	0.24	0	3	0	6	0	0.035	0	0	0	0	0	0	0	0.134852	CG14043
CG1420	Pre-mRNA-splicing factor Slu7 OS=Drosophila melanogaster GN=Slu7 PE=1 SV=2	2	0	2	0	0.084	0	0	0	0	0	0	0	0	0	0	0	0	0	0.211325	CG1420
CG14207	CG14207, isoform A OS=Drosophila melanogaster GN=HspB8 PE=1 SV=1	8	2	9	3	0.519	0.158	4	0	8	0	0.295	0	0	0	0	0	0	0	0.141618	CG14207
CG14211	LD31102p OS=Drosophila melanogaster GN=MKP-4 PE=2 SV=1	0	0	0	0	0	0	4	0	4	0	0.088	0	0	0	0	0	0	0	0.211325	CG14211
CG14220	CG14220 OS=Drosophila melanogaster GN=CG14220-RA PE=1 SV=1	5	0	5	0	0.147	0	2	0	2	0	0.055	0	0	0	0	0	0	0	0.124761	CG14220
CG14232	CG14232 OS=Drosophila melanogaster GN=CG14232 PE=1 SV=1	0	0	0	0	0	0	2	0	2	0	0.048	0	0	0	0	0	0	0	0.211325	CG14232
CG14233	LD26007p OS=Drosophila melanogaster GN=meso18E PE=1 SV=1	3	0	4	0	0.101	0	4	0	5	0	0.09	0	0	0	0	0	0	0	0.0958548	CG14233
CG1430	Bystin OS=Drosophila melanogaster GN=bys PE=1 SV=2	4	0	5	0	0.119	0	11	0	21	0	0.227	0	0	0	0	0	0	0	0.130052	CG1430
CG1433	Another transcription unit protein OS=Drosophila melanogaster GN=Atu PE=1 SV=2	5	0	5	0	0.074	0	3	5	8	8	0.08	0.054	0	0	0	0	0	0	0.337466	CG1433
CG14434	CG14434 OS=Drosophila melanogaster GN=CG14434 PE=2 SV=1	4	0	4	0	0.257	0	0	0	0	0	0	0	0	0	0	0	0	0	0.211325	CG14434
CG1444	CG1444 OS=Drosophila melanogaster GN=CG1444 PE=2 SV=1	0	0	0	0	0	0	2	0	2	0	0.084	0	0	0	0	0	0	0	0.211325	CG1444
CG14447	FI03335p OS=Drosophila melanogaster GN=Grip PE=1 SV=2	2	0	2	0	0.034	0	0	0	0	0	0	0	0	0	0	0	0	0	0.211325	CG14447
CG1448	Innexin inx3 OS=Drosophila melanogaster GN=inx3 PE=1 SV=1	0	0	0	0	0	0	3	0	4	0	0.101	0	0	0	0	0	0	0	0.211325	CG1448
CG14517	Beta4GalNAcTB OS=Drosophila melanogaster GN=beta4GalNAcTB PE=2 SV=1	0	0	0	0	0	0	2	0	3	0	0.056	0	0	0	0	0	0	0	0.211325	CG14517
CG14618	RNA (guanine-9-)-methyltransferase domain-containing protein 2 homolog OS=Drosophila melanogaster GN=CG14618 PE=2 SV=1	5	0	6	0	0.135	0	3	0	4	0	0.157	0	0	0	0	0	0	0	0.103941	CG14618
CG14657	CG14657 OS=Drosophila melanogaster GN=CG14657 PE=1 SV=1	0	0	0	0	0	0	2	0	3	0	0.068	0	0	0	0	0	0	0	0.211325	CG14657
CG1469	AT19513p OS=Drosophila melanogaster GN=Fer2LCH PE=2 SV=1	2	0	2	0	0.141	0	3	0	4	0	0.119	0	0	0	0	0	0	0	0.0996796	CG1469
CG14749	Nucleoporin GLE1 OS=Drosophila melanogaster GN=GLE1 PE=2 SV=1	2	0	2	0	0.021	0	0	0	0	0	0	0	0	0	0	0	0	0	0.211325	CG14749
CG14786	CG14786 OS=Drosophila melanogaster GN=EG:BACN32G11.3 PE=1 SV=1	0	0	0	0	0	0	2	0	4	0	0.04	0	0	0	0	0	0	0	0.211325	CG14786
CG14802	Mediator of RNA polymerase II transcription subunit 18 OS=Drosophila melanogaster GN=MED18 PE=1 SV=1	3	0	4	0	0.161	0	4	0	8	0	0.161	0	0	0	0	0	0	0	0.0958548	CG14802
CG14803	Protein MMS22-like OS=Drosophila melanogaster GN=CG14803 PE=1 SV=2	0	0	0	0	0	0	2	0	2	0	0.019	0	0	0	0	0	0	0	0.211325	CG14803
CG14805	CG14805 OS=Drosophila melanogaster GN=CG14805 PE=2 SV=1	2	0	3	0	0.059	0	3	0	4	0	0.043	0	0	0	0	0	0	0	0.0996796	CG14805
CG1486	CG1486, isoform A OS=Drosophila melanogaster GN=CG1486 PE=1 SV=1	3	0	3	0	0.09	0	5	0	8	0	0.093	0	0	0	0	0	0	0	0.103941	CG1486
CG14899	AT09129p OS=Drosophila melanogaster GN=Der-2 PE=1 SV=1	0	0	0	0	0	0	4	0	5	0	0.057	0	0	0	0	0	0	0	0.211325	CG14899
CG1490	Ubiquitin carboxyl-terminal hydrolase 7 OS=Drosophila melanogaster GN=Usp7 PE=1 SV=1	11	0	15	0	0.158	0	4	0	4	0	0.032	0	0	0	0	0	0	0	0.130052	CG1490
CG14902	AT03047p OS=Drosophila melanogaster GN=decay PE=2 SV=1	2	0	2	0	0.068	0	0	0	0	0	0	0	0	0	0	0	0	0	0.211325	CG14902
CG14938	Crooked legs, isoform D OS=Drosophila melanogaster GN=crol PE=2 SV=1	0	0	0	0	0	0	2	0	2	0	0.031	0	0	0	0	0	0	0	0.211325	CG14938
CG14965	CG14965 OS=Drosophila melanogaster GN=CG14965 PE=1 SV=1	0	0	0	0	0	0	2	0	4	0	0.039	0	0	0	0	0	0	0	0.211325	CG14965
CG14985	CG14985 OS=Drosophila melanogaster GN=CG14985-RB PE=1 SV=3	5	0	6	0	0.444	0	0	0	0	0	0	0	0	0	0	0	0	0	0.211325	CG14985
CG15010	F-box/WD repeat-containing protein 7 OS=Drosophila melanogaster GN=ago PE=1 SV=1	2	0	2	0	0.026	0	0	0	0	0	0	0	0	0	0	0	0	0	0.211325	CG15010
CG15019	CG15019, isoform A OS=Drosophila melanogaster GN=CG15019 PE=2 SV=1	3	0	3	0	0.26	0	0	2	0	3	0	0.062	0	0	0	0	0	0	0.398585	CG15019
CG15081	LD46344p OS=Drosophila melanogaster GN=l(2)03709 PE=2 SV=2	0	0	0	0	0	0	2	0	2	0	0.124	0	0	0	0	0	0	0	0.211325	CG15081
CG15099	Protein dopey-1 homolog OS=Drosophila melanogaster GN=CG15099 PE=1 SV=1	0	0	0	0	0	0	2	0	2	0	0.005	0	0	0	0	0	0	0	0.211325	CG15099
CG15107	CG15107 OS=Drosophila melanogaster GN=CG15107 PE=2 SV=1	0	0	0	0	0	0	2	0	2	0	0.18	0	0	0	0	0	0	0	0.211325	CG15107
CG15110	Exostosin-3 OS=Drosophila melanogaster GN=botv PE=1 SV=1	0	0	0	0	0	0	2	0	3	0	0.026	0	0	0	0	0	0	0	0.211325	CG15110
CG15168	CG15168 OS=Drosophila melanogaster GN=CG15168 PE=2 SV=1	0	0	0	0	0	0	2	0	2	0	0.156	0	0	0	0	0	0	0	0.211325	CG15168
CG15218	Cyclin K, isoform A OS=Drosophila melanogaster GN=CycK PE=1 SV=1	3	0	6	0	0.095	0	3	0	3	0	0.17	0	0	0	0	0	0	0	0.0917517	CG15218
CG15266	IP04426p OS=Drosophila melanogaster GN=l(2)35Cc PE=1 SV=3	2	0	3	0	0.198	0	0	0	0	0	0	0	0	0	0	0	0	0	0.211325	CG15266
CG15317	CG15317 OS=Drosophila melanogaster GN=CG15317 PE=2 SV=1	2	0	2	0	0.192	0	0	0	0	0	0	0	0	0	0	0	0	0	0.211325	CG15317
CG15319	Nejire OS=Drosophila melanogaster GN=nej PE=2 SV=2	0	0	0	0	0	0	6	0	7	0	0.026	0	0	0	0	0	0	0	0.211325	CG15319
CG1542	Probable rRNA-processing protein EBP2 homolog OS=Drosophila melanogaster GN=CG1542 PE=2 SV=1	5	2	5	2	0.176	0.062	0	0	0	0	0	0	0	0	0	0	0	0	0.310704	CG1542
CG15435	AT19250p OS=Drosophila melanogaster GN=CG15435 PE=1 SV=1	2	0	2	0	0.052	0	3	0	4	0	0.07	0	0	0	0	0	0	0	0.0996796	CG15435
CG15440	CG15440 OS=Drosophila melanogaster GN=CG15440 PE=1 SV=1	2	0	2	0	0.149	0	0	0	0	0	0	0	0	0	0	0	0	0	0.211325	CG15440
CG15445	CG15445, isoform A OS=Drosophila melanogaster GN=CG15445 PE=2 SV=2	2	0	2	0	0.086	0	0	0	0	0	0	0	0	0	0	0	0	0	0.211325	CG15445
CG15481	FI07225p OS=Drosophila melanogaster GN=Ski6 PE=1 SV=1	0	0	0	0	0	0	2	0	2	0	0.049	0	0	0	0	0	0	0	0.211325	CG15481
CG15514	CG15514 OS=Drosophila melanogaster GN=CG15514 PE=2 SV=1	0	0	0	0	0	0	2	0	2	0	0.065	0	0	0	0	0	0	0	0.211325	CG15514
CG15645	Cervantes, isoform A OS=Drosophila melanogaster GN=cerv PE=2 SV=2	2	0	2	0	0.122	0	3	0	3	0	0.148	0	0	0	0	0	0	0	0.0996796	CG15645
CG15697	Ribosomal protein S30, isoform A OS=Drosophila melanogaster GN=RpS30 PE=2 SV=1	0	0	0	0	0	0	2	0	2	0	0.076	0	0	0	0	0	0	0	0.211325	CG15697
CG15727	CG15727 OS=Drosophila melanogaster GN=CG15727 PE=2 SV=1	0	0	0	0	0	0	3	0	3	0	0.122	0	0	0	0	0	0	0	0.211325	CG15727
CG15735	Protein LSM12 homolog A OS=Drosophila melanogaster GN=CG15735 PE=1 SV=2	3	0	3	0	0.171	0	0	0	0	0	0	0	0	0	0	0	0	0	0.211325	CG15735
CG15736	Chrac-16 OS=Drosophila melanogaster GN=Chrac-16 PE=1 SV=1	0	0	0	0	0	0	4	0	5	0	0.286	0	0	0	0	0	0	0	0.211325	CG15736
CG1575	CG1575 OS=Drosophila melanogaster GN=CG1575 PE=2 SV=1	0	0	0	0	0	0	4	0	5	0	0.053	0	0	0	0	0	0	0	0.211325	CG1575
CG15797	Synembryn OS=Drosophila melanogaster GN=ric8a PE=1 SV=2	2	0	2	0	0.086	0	6	0	9	0	0.084	0	0	0	0	0	0	0	0.134852	CG15797
CG15812	FI07618p OS=Drosophila melanogaster GN=pfk PE=1 SV=2	4	0	4	0	0.116	0	0	0	0	0	0	0	0	0	0	0	0	0	0.211325	CG15812
CG15825	Fondue, isoform B OS=Drosophila melanogaster GN=fon PE=2 SV=1	0	0	0	0	0	0	3	0	3	0	0.071	0	0	0	0	0	0	0	0.211325	CG15825
CG15828	CG15828, isoform A OS=Drosophila melanogaster GN=CG15828 PE=2 SV=1	0	0	0	0	0	0	2	0	2	0	0.009	0	0	0	0	0	0	0	0.211325	CG15828
CG15862	cAMP-dependent protein kinase type II regulatory subunit OS=Drosophila melanogaster GN=Pka-R2 PE=1 SV=2	2	0	2	0	0.117	0	2	2	3	2	0.056	0.069	0	0	0	0	0	0	0.259259	CG15862
CG1609	AT10027p OS=Drosophila melanogaster GN=Gcn2 PE=1 SV=1	0	0	0	0	0	0	4	0	5	0	0.023	0	0	0	0	0	0	0	0.211325	CG1609
CG1621	CG1621 OS=Drosophila melanogaster GN=CG1621 PE=1 SV=1	0	0	0	0	0	0	2	0	2	0	0.12	0	0	0	0	0	0	0	0.211325	CG1621
CG1640	AT04676p OS=Drosophila melanogaster GN=CG1640 PE=2 SV=3	0	0	0	0	0	0	2	0	3	0	0.045	0	0	0	0	0	0	0	0.211325	CG1640
CG1665	CG1665 OS=Drosophila melanogaster GN=CG1665-RA PE=2 SV=1	0	0	0	0	0	0	2	0	3	0	0.068	0	0	0	0	0	0	0	0.211325	CG1665
CG1671	CG1671 OS=Drosophila melanogaster GN=CG1671 PE=1 SV=1	0	0	0	0	0	0	2	0	2	0	0.029	0	0	0	0	0	0	0	0.211325	CG1671
CG16758	CG16758, isoform D OS=Drosophila melanogaster GN=CG16758 PE=1 SV=3	0	0	0	0	0	0	2	0	2	0	0.076	0	0	0	0	0	0	0	0.211325	CG16758
CG16812	CG16812 OS=Drosophila melanogaster GN=CG16812 PE=1 SV=1	4	0	4	0	0.092	0	3	0	5	0	0.075	0	0	0	0	0	0	0	0.0958548	CG16812
CG16892	CG16892 OS=Drosophila melanogaster GN=CG16892-RA PE=2 SV=1	0	0	0	0	0	0	9	0	10	0	0.268	0	0	0	0	0	0	0	0.211325	CG16892
CG16903	CG16903 OS=Drosophila melanogaster GN=EG:67A9.2 PE=2 SV=1	3	0	3	0	0.079	0	0	0	0	0	0	0	0	0	0	0	0	0	0.211325	CG16903
CG16908	CG16908 OS=Drosophila melanogaster GN=CG16908 PE=1 SV=1	0	0	0	0	0	0	2	0	2	0	0.024	0	0	0	0	0	0	0	0.211325	CG16908
CG16912	Probable tyrosyl-tRNA synthetase, mitochondrial OS=Drosophila melanogaster GN=CG16912 PE=2 SV=1	0	0	0	0	0	0	2	0	2	0	0.067	0	0	0	0	0	0	0	0.211325	CG16912
CG1696	CTD nuclear envelope phosphatase 1 homolog OS=Drosophila melanogaster GN=l(1)G0269 PE=2 SV=1	2	0	3	0	0.128	0	3	2	3	2	0.189	0.045	0	0	0	0	0	0	0.210198	CG1696
CG16969	AT13028p OS=Drosophila melanogaster GN=dgt2 PE=1 SV=1	2	0	2	0	0.087	0	0	0	0	0	0	0	0	0	0	0	0	0	0.211325	CG16969
CG16973	Misshapen, isoform A OS=Drosophila melanogaster GN=msn PE=1 SV=3	0	0	0	0	0	0	2	0	3	0	0.015	0	0	0	0	0	0	0	0.211325	CG16973
CG16989	CG16989 OS=Drosophila melanogaster GN=EG:34F3.4 PE=2 SV=2	0	0	0	0	0	0	2	0	3	0	0.02	0	0	0	0	0	0	0	0.211325	CG16989
CG17064	Guanylate kinase-associated protein mars OS=Drosophila melanogaster GN=mars PE=1 SV=1	8	0	10	0	0.151	0	5	4	8	4	0.05	0.024	0	0	0	0	0	0	0.170732	CG17064
CG17068	CG17068 OS=Drosophila melanogaster GN=CG17068 PE=1 SV=1	0	0	0	0	0	0	2	0	2	0	0.039	0	0	0	0	0	0	0	0.211325	CG17068
CG17082	CG17082, isoform C (Fragment) OS=Drosophila melanogaster GN=CG17082 PE=2 SV=1	0	0	0	0	0	0	2	0	2	0	0.036	0	0	0	0	0	0	0	0.211325	CG17082
CG17136	RNA-binding protein 1 OS=Drosophila melanogaster GN=Rbp1 PE=2 SV=3	2	0	2	0	0.146	0	0	2	0	2	0	0.083	0	0	0	0	0	0	0.5	CG17136
CG17153	CG17153 OS=Drosophila melanogaster GN=ssp PE=1 SV=1	6	0	8	0	0.258	0	2	2	3	2	0.041	0.049	0	0	0	0	0	0	0.189265	CG17153
CG1716	Probable histone-lysine N-methyltransferase CG1716 OS=Drosophila melanogaster GN=Set2 PE=1 SV=2	2	0	2	0	0.022	0	0	0	0	0	0	0	0	0	0	0	0	0	0.211325	CG1716
CG17161	Serine/threonine-protein kinase grp OS=Drosophila melanogaster GN=grp PE=1 SV=2	0	0	0	0	0	0	6	0	7	0	0.102	0	0	0	0	0	0	0	0.211325	CG17161
CG17170	Protein suppressor of forked OS=Drosophila melanogaster GN=su(f) PE=1 SV=2	7	0	11	0	0.123	0	0	0	0	0	0	0	0	0	0	0	0	0	0.211325	CG17170
CG17209	DNA-directed RNA polymerase OS=Drosophila melanogaster GN=CG17209 PE=3 SV=2	0	0	0	0	0	0	3	0	4	0	0.043	0	0	0	0	0	0	0	0.211325	CG17209
CG17227	DNA ligase OS=Drosophila melanogaster GN=lig3 PE=1 SV=3	3	0	3	0	0.055	0	0	0	0	0	0	0	0	0	0	0	0	0	0.211325	CG17227
CG17228	Homeobox protein prospero OS=Drosophila melanogaster GN=pros PE=1 SV=3	3	0	3	0	0.04	0	2	0	6	0	0.015	0	0	0	0	0	0	0	0.0996796	CG17228
CG17245	Plexin-B OS=Drosophila melanogaster GN=plexB PE=1 SV=2	0	0	0	0	0	0	2	0	2	0	0.022	0	0	0	0	0	0	0	0.211325	CG17245
CG17269	Fancd2 OS=Drosophila melanogaster GN=Fancd2 PE=2 SV=1	0	0	0	0	0	0	3	0	3	0	0.022	0	0	0	0	0	0	0	0.211325	CG17269
CG17286	BcDNA.LD24702 OS=Drosophila melanogaster GN=spd-2 PE=1 SV=2	0	0	0	0	0	0	2	0	5	0	0.017	0	0	0	0	0	0	0	0.211325	CG17286
CG17367	LD10453p OS=Drosophila melanogaster GN=Lnk PE=1 SV=1	0	0	0	0	0	0	2	0	3	0	0.069	0	0	0	0	0	0	0	0.211325	CG17367
CG17369	V-type proton ATPase subunit B OS=Drosophila melanogaster GN=Vha55 PE=1 SV=1	3	0	4	0	0.104	0	0	0	0	0	0	0	0	0	0	0	0	0	0.211325	CG17369
CG17397	Mediator of RNA polymerase II transcription subunit 21 OS=Drosophila melanogaster GN=MED21 PE=1 SV=1	5	0	7	0	0.437	0	0	0	0	0	0	0	0	0	0	0	0	0	0.211325	CG17397
CG1745	Heterochromatin protein 5, isoform B OS=Drosophila melanogaster GN=HP5 PE=1 SV=1	2	0	2	0	0.069	0	2	0	2	0	0.025	0	0	0	0	0	0	0	0.0917517	CG1745
CG17490	CG17490, isoform B (Fragment) OS=Drosophila melanogaster GN=CG17490 PE=2 SV=1	0	0	0	0	0	0	2	0	2	0	0.042	0	0	0	0	0	0	0	0.211325	CG17490
CG17498	Mad2 OS=Drosophila melanogaster GN=mad2 PE=1 SV=1	7	0	12	0	0.285	0	3	0	5	0	0.101	0	0	0	0	0	0	0	0.120951	CG17498
CG17528	Serine/threonine-protein kinase CG17528 OS=Drosophila melanogaster GN=CG17528 PE=1 SV=1	9	0	9	0	0.138	0	10	2	13	2	0.15	0.016	0	0	0	0	0	0	0.106518	CG17528
CG17540	Spf45, isoform C OS=Drosophila melanogaster GN=Spf45 PE=4 SV=2	6	0	8	0	0.358	0	4	0	5	0	0.129	0	0	0	0	0	0	0	0.0996796	CG17540
CG17596	RPS6-protein kinase-II OS=Drosophila melanogaster GN=S6kII PE=1 SV=1	2	0	3	0	0.036	0	3	0	3	0	0.06	0	0	0	0	0	0	0	0.0996796	CG17596
CG17611	Eukaryotic translation initiation factor 6 OS=Drosophila melanogaster GN=eIF6 PE=2 SV=3	3	0	8	0	0.339	0	2	0	2	0	0.102	0	0	0	0	0	0	0	0.0996796	CG17611
CG1765	Isoform ECR-A of Ecdysone receptor OS=Drosophila melanogaster GN=EcR	3	0	3	0	0.052	0	4	0	10	0	0.091	0	0	0	0	0	0	0	0.0958548	CG1765
CG17652	CG17652 OS=Drosophila melanogaster GN=CG17652 PE=1 SV=1	2	0	2	0	0.037	0	0	0	0	0	0	0	0	0	0	0	0	0	0.211325	CG17652
CG17654	Isoform A of Enolase OS=Drosophila melanogaster GN=Eno	4	0	4	0	0.157	0	0	0	0	0	0	0	0	0	0	0	0	0	0.211325	CG17654
CG17768	CG17768 OS=Drosophila melanogaster GN=LSm-4-RB PE=1 SV=3	2	0	2	0	0.104	0	0	0	0	0	0	0	0	0	0	0	0	0	0.211325	CG17768
CG17785	Golgin-84 OS=Drosophila melanogaster GN=Golgin84 PE=1 SV=2	0	0	0	0	0	0	2	0	2	0	0.037	0	0	0	0	0	0	0	0.211325	CG17785
CG1785	Uncharacterized protein CG1785 OS=Drosophila melanogaster GN=CG1785 PE=1 SV=1	2	0	2	0	0.063	0	0	0	0	0	0	0	0	0	0	0	0	0	0.211325	CG1785
CG17866	Male fertility factor kl2 (Fragment) OS=Drosophila melanogaster GN=kl-2 PE=4 SV=3	0	0	0	0	0	0	2	0	2	0	0.004	0	0	0	0	0	0	0	0.211325	CG17866
CG17896	Probable methylmalonate-semialdehyde dehydrogenase [acylating], mitochondrial OS=Drosophila melanogaster GN=CG17896 PE=1 SV=1	0	0	0	0	0	0	2	0	4	0	0.087	0	0	0	0	0	0	0	0.211325	CG17896
CG1793	Mediator of RNA polymerase II transcription subunit 26 OS=Drosophila melanogaster GN=MED26 PE=1 SV=2	5	0	5	0	0.069	0	0	0	0	0	0	0	0	0	0	0	0	0	0.211325	CG1793
CG17947	Catenin alpha OS=Drosophila melanogaster GN=alpha-Cat PE=1 SV=2	0	0	0	0	0	0	3	0	4	0	0.069	0	0	0	0	0	0	0	0.211325	CG17947
CG1796	LD24662p OS=Drosophila melanogaster GN=Tango4 PE=2 SV=1	2	0	3	0	0.046	0	7	4	12	5	0.205	0.041	0	0	0	0	0	0	0.271578	CG1796
CG1800	LD23072p OS=Drosophila melanogaster GN=pasha PE=1 SV=1	0	0	0	0	0	0	2	0	2	0	0.044	0	0	0	0	0	0	0	0.211325	CG1800
CG18069	Isoform 3 of Calcium/calmodulin-dependent protein kinase type II alpha chain OS=Drosophila melanogaster GN=CaMKII	0	0	0	0	0	0	2	0	3	0	0.043	0	0	0	0	0	0	0	0.211325	CG18069
CG18076	Short stop, isoform H OS=Drosophila melanogaster GN=shot PE=1 SV=1	2	0	2	0	0.003	0	0	0	0	0	0	0	0	0	0	0	0	0	0.211325	CG18076
CG18214	Trio, isoform A OS=Drosophila melanogaster GN=trio PE=1 SV=1	0	0	0	0	0	0	2	0	3	0	0.013	0	0	0	0	0	0	0	0.211325	CG18214
CG18259	CG18259 OS=Drosophila melanogaster GN=CG18259-RA PE=1 SV=2	10	0	10	0	0.181	0	6	0	6	0	0.116	0	0	0	0	0	0	0	0.103941	CG18259
CG18271	Structure-specific endonuclease subunit SLX1 homolog OS=Drosophila melanogaster GN=CG18271 PE=1 SV=3	0	0	0	0	0	0	3	0	3	0	0.101	0	0	0	0	0	0	0	0.211325	CG18271
CG1832	CG1832, isoform A OS=Drosophila melanogaster GN=Jupiter PE=1 SV=1	0	0	0	0	0	0	8	0	8	0	0.125	0	0	0	0	0	0	0	0.211325	CG1832
CG1836	Rad23, isoform B OS=Drosophila melanogaster GN=Rad23 PE=1 SV=1	2	0	2	0	0.163	0	0	0	0	0	0	0	0	0	0	0	0	0	0.211325	CG1836
CG18397	LD01527p OS=Drosophila melanogaster GN=ssp3 PE=1 SV=3	3	0	3	0	0.022	0	0	0	0	0	0	0	0	0	0	0	0	0	0.211325	CG18397
CG18412	Polyhomeotic-proximal chromatin protein OS=Drosophila melanogaster GN=ph-p PE=1 SV=2	4	0	4	0	0.05	0	0	0	0	0	0	0	0	0	0	0	0	0	0.211325	CG18412
CG18426	LD12035p OS=Drosophila melanogaster GN=ytr PE=2 SV=1	0	0	0	0	0	0	2	0	2	0	0.16	0	0	0	0	0	0	0	0.211325	CG18426
CG1845	CG1845 OS=Drosophila melanogaster GN=Br140 PE=1 SV=1	2	0	2	0	0.029	0	0	0	0	0	0	0	0	0	0	0	0	0	0.211325	CG1845
CG18468	LD09786p OS=Drosophila melanogaster GN=Lhr PE=1 SV=1	2	0	4	0	0.081	0	3	0	4	0	0.096	0	0	0	0	0	0	0	0.0996796	CG18468
CG18492	Mitogen-activated protein kinase kinase kinase 7 OS=Drosophila melanogaster GN=Tak1 PE=2 SV=1	0	0	0	0	0	0	2	0	2	0	0.034	0	0	0	0	0	0	0	0.211325	CG18492
CG18578	GM04645p OS=Drosophila melanogaster GN=Ugt86Da PE=1 SV=1	0	0	0	0	0	0	2	0	2	0	0.045	0	0	0	0	0	0	0	0.211325	CG18578
CG18591	Probable small nuclear ribonucleoprotein E OS=Drosophila melanogaster GN=CG18591 PE=1 SV=1	2	0	2	0	0.383	0	3	0	3	0	0.319	0	0	0	0	0	0	0	0.0996796	CG18591
CG18731	CG18731 OS=Drosophila melanogaster GN=CG18731-RA PE=2 SV=1	0	0	0	0	0	0	2	0	3	0	0.185	0	0	0	0	0	0	0	0.211325	CG18731
CG18766	CG18766, isoform A OS=Drosophila melanogaster GN=CG18766 PE=1 SV=2	4	0	4	0	0.097	0	2	0	2	0	0.117	0	0	0	0	0	0	0	0.112702	CG18766
CG18815	CG18815, isoform A OS=Drosophila melanogaster GN=CG18815 PE=2 SV=1	2	0	2	0	0.162	0	0	0	0	0	0	0	0	0	0	0	0	0	0.211325	CG18815
CG1910	CG1910, isoform C OS=Drosophila melanogaster GN=CG1910 PE=2 SV=1	6	0	10	0	0.242	0	0	0	0	0	0	0	0	0	0	0	0	0	0.211325	CG1910
CG1915	Isoform D of Titin OS=Drosophila melanogaster GN=sls	3	0	3	0	0.002	0	0	0	0	0	0	0	0	0	0	0	0	0	0.211325	CG1915
CG1939	Dephospho-CoA kinase OS=Drosophila melanogaster GN=Dpck PE=2 SV=1	2	0	3	0	0.089	0	3	0	3	0	0.14	0	0	0	0	0	0	0	0.0996796	CG1939
CG1950	CG1950 OS=Drosophila melanogaster GN=CG1950 PE=1 SV=1	0	0	0	0	0	0	2	0	4	0	0.035	0	0	0	0	0	0	0	0.211325	CG1950
CG1967	RE49489p OS=Drosophila melanogaster GN=p24-1 PE=2 SV=1	0	0	0	0	0	0	3	0	6	0	0.138	0	0	0	0	0	0	0	0.211325	CG1967
CG1968	Conserved oligomeric Golgi complex subunit 6 OS=Drosophila melanogaster GN=CG1968 PE=2 SV=1	2	0	2	0	0.078	0	5	0	6	0	0.087	0	0	0	0	0	0	0	0.124761	CG1968
CG1989	Protein yippee OS=Drosophila melanogaster GN=Yippee PE=1 SV=1	0	0	0	0	0	0	3	0	3	0	0.198	0	0	0	0	0	0	0	0.211325	CG1989
CG2009	Bip2 OS=Drosophila melanogaster GN=bip2 PE=1 SV=1	10	0	12	0	0.086	0	3	2	3	3	0.028	0.018	0	0	0	0	0	0	0.170465	CG2009
CG2072	FI09619p OS=Drosophila melanogaster GN=Mad1 PE=1 SV=1	9	0	12	0	0.174	0	7	0	7	0	0.096	0	0	0	0	0	0	0	0.0949043	CG2072
CG2098	Ferrochelatase, mitochondrial OS=Drosophila melanogaster GN=Fech PE=2 SV=1	6	0	8	0	0.281	0	8	0	12	0	0.214	0	0	0	0	0	0	0	0.0958548	CG2098
CG2100	CG2100, isoform A OS=Drosophila melanogaster GN=CG2100 PE=1 SV=1	2	0	2	0	0.065	0	0	0	0	0	0	0	0	0	0	0	0	0	0.211325	CG2100
CG2125	Transcriptional activator cubitus interruptus OS=Drosophila melanogaster GN=ci PE=1 SV=2	0	0	0	0	0	0	4	0	4	0	0.049	0	0	0	0	0	0	0	0.211325	CG2125
CG2151	Isoform A of Thioredoxin reductase 1, mitochondrial OS=Drosophila melanogaster GN=Trxr-1	6	0	13	0	0.218	0	3	0	4	0	0.081	0	0	0	0	0	0	0	0.112702	CG2151
CG2162	CG2162, isoform A OS=Drosophila melanogaster GN=CG2162 PE=2 SV=1	0	0	0	0	0	0	3	0	3	0	0.045	0	0	0	0	0	0	0	0.211325	CG2162
CG2182	Gametogenetin-binding protein 2-like OS=Drosophila melanogaster GN=CG2182 PE=2 SV=3	2	0	3	0	0.054	0	0	0	0	0	0	0	0	0	0	0	0	0	0.211325	CG2182
CG2206	LD24308p OS=Drosophila melanogaster GN=l(1)G0193 PE=1 SV=1	0	0	0	0	0	0	2	0	2	0	0.015	0	0	0	0	0	0	0	0.211325	CG2206
CG2212	Swiss cheese, isoform C OS=Drosophila melanogaster GN=sws PE=4 SV=1	2	0	2	0	0.033	0	8	0	8	0	0.081	0	0	0	0	0	0	0	0.14993	CG2212
CG2213	Mitotic spindle density 5 OS=Drosophila melanogaster GN=msd5 PE=1 SV=1	2	0	2	0	0.051	0	2	3	3	5	0.051	0.107	0	0	0	0	0	0	0.398585	CG2213
CG2246	CG2246, isoform C OS=Drosophila melanogaster GN=CG2246 PE=1 SV=1	7	0	10	0	0.264	0	10	2	11	2	0.236	0.028	0	0	0	0	0	0	0.114978	CG2246
CG2330	Neurochondrin homolog OS=Drosophila melanogaster GN=Neurochondrin PE=2 SV=1	0	0	0	0	0	0	5	0	6	0	0.075	0	0	0	0	0	0	0	0.211325	CG2330
CG2478	Protein brunelleschi OS=Drosophila melanogaster GN=bru PE=1 SV=2	3	0	3	0	0.053	0	5	0	8	0	0.049	0	0	0	0	0	0	0	0.103941	CG2478
CG2522	Signal recognition particle receptor subunit alpha homolog OS=Drosophila melanogaster GN=Gtp-bp PE=1 SV=2	3	0	3	0	0.086	0	2	0	4	0	0.059	0	0	0	0	0	0	0	0.0996796	CG2522
CG2669	Protein downstream neighbor of son homolog OS=Drosophila melanogaster GN=hd PE=1 SV=1	0	0	0	0	0	0	2	0	2	0	0.035	0	0	0	0	0	0	0	0.211325	CG2669
CG2674	S-adenosylmethionine synthase OS=Drosophila melanogaster GN=Sam-S PE=2 SV=2	4	0	5	0	0.191	0	3	0	3	0	0.123	0	0	0	0	0	0	0	0.0958548	CG2674
CG2699	LD42724p OS=Drosophila melanogaster GN=Pi3K21B PE=1 SV=3	3	0	5	0	0.087	0	0	0	0	0	0	0	0	0	0	0	0	0	0.211325	CG2699
CG2701	CG2701 OS=Drosophila melanogaster GN=crm PE=1 SV=1	2	0	3	0	0.014	0	2	0	3	0	0.038	0	0	0	0	0	0	0	0.0917517	CG2701
CG2720	Hsp70/Hsp90 organizing protein homolog OS=Drosophila melanogaster GN=Hop PE=2 SV=1	2	0	2	0	0.082	0	0	0	0	0	0	0	0	0	0	0	0	0	0.211325	CG2720
CG2747	CG2747, isoform C OS=Drosophila melanogaster GN=CG2747 PE=2 SV=1	0	0	0	0	0	0	2	0	2	0	0.017	0	0	0	0	0	0	0	0.211325	CG2747
CG2774	CG2774 OS=Drosophila melanogaster GN=CG2774 PE=1 SV=1	2	0	2	0	0.068	0	3	0	3	0	0.048	0	0	0	0	0	0	0	0.0996796	CG2774
CG2890	Serine/threonine-protein phosphatase 4 regulatory subunit 2 OS=Drosophila melanogaster GN=PPP4R2r PE=1 SV=2	2	0	2	0	0.034	0	2	0	4	0	0.043	0	0	0	0	0	0	0	0.0917517	CG2890
CG2899	AT08303p OS=Drosophila melanogaster GN=ksr PE=2 SV=1	0	0	0	0	0	0	3	0	3	0	0.021	0	0	0	0	0	0	0	0.211325	CG2899
CG2916	LD28935p OS=Drosophila melanogaster GN=Sep5 PE=1 SV=1	2	0	2	0	0.045	0	3	0	4	0	0.107	0	0	0	0	0	0	0	0.0996796	CG2916
CG2918	CG2918, isoform A OS=Drosophila melanogaster GN=EG:25E8.1 PE=1 SV=1	2	0	2	0	0.059	0	3	0	3	0	0.061	0	0	0	0	0	0	0	0.0996796	CG2918
CG2921	CG2921 OS=Drosophila melanogaster GN=CG2921 PE=2 SV=1	2	0	2	0	0.094	0	0	0	0	0	0	0	0	0	0	0	0	0	0.211325	CG2921
CG2944	Gustavus, isoform A OS=Drosophila melanogaster GN=gus PE=1 SV=1	6	0	6	0	0.166	0	7	0	15	0	0.198	0	0	0	0	0	0	0	0.0929542	CG2944
CG2984	LD34192p OS=Drosophila melanogaster GN=Pp2C1 PE=1 SV=2	2	0	3	0	0.039	0	0	0	0	0	0	0	0	0	0	0	0	0	0.211325	CG2984
CG2995	G9a OS=Drosophila melanogaster GN=G9a PE=1 SV=1	4	0	6	0	0.03	0	0	0	0	0	0	0	0	0	0	0	0	0	0.211325	CG2995
CG30007	CG30007, isoform C OS=Drosophila melanogaster GN=CG30007 PE=4 SV=1	0	0	0	0	0	0	8	0	9	0	0.052	0	0	0	0	0	0	0	0.211325	CG30007
CG3002	Gga OS=Drosophila melanogaster GN=Gga PE=2 SV=2	2	0	2	0	0.111	0	0	0	0	0	0	0	0	0	0	0	0	0	0.211325	CG3002
CG30020	CG30020 OS=Drosophila melanogaster GN=CG30020 PE=1 SV=1	3	0	3	0	0.032	0	0	0	0	0	0	0	0	0	0	0	0	0	0.211325	CG30020
CG3011	Serine hydroxymethyltransferase OS=Drosophila melanogaster GN=CG3011 PE=1 SV=1	2	0	4	0	0.035	0	0	0	0	0	0	0	0	0	0	0	0	0	0.211325	CG3011
CG3034	Mediator of RNA polymerase II transcription subunit 22 OS=Drosophila melanogaster GN=MED22 PE=1 SV=1	3	0	7	0	0.413	0	0	0	0	0	0	0	0	0	0	0	0	0	0.211325	CG3034
CG3038	CG3038, isoform B OS=Drosophila melanogaster GN=CG3038-RB PE=2 SV=1	0	0	0	0	0	0	2	0	2	0	0.059	0	0	0	0	0	0	0	0.211325	CG3038
CG30390	CG30390 OS=Drosophila melanogaster GN=Sgf29 PE=2 SV=2	11	2	15	7	0.453	0.107	10	2	15	2	0.37	0.048	0	0	0	0	0	0	0.122765	CG30390
CG30410	CG30410 OS=Drosophila melanogaster GN=CG30410 PE=4 SV=3	0	0	0	0	0	0	7	0	9	0	0.32	0	0	0	0	0	0	0	0.211325	CG30410
CG30496	CG30496 OS=Drosophila melanogaster GN=CG30493;CG30496;l(2)08492 PE=2 SV=1	4	0	5	0	0.131	0	2	0	3	0	0.033	0	0	0	0	0	0	0	0.112702	CG30496
CG3060	Anaphase-promoting complex subunit 2 OS=Drosophila melanogaster GN=mr PE=1 SV=1	0	0	0	0	0	0	6	0	8	0	0.07	0	0	0	0	0	0	0	0.211325	CG3060
CG3061	CG3061 OS=Drosophila melanogaster GN=CG3061 PE=2 SV=1	2	0	2	0	0.078	0	0	0	0	0	0	0	0	0	0	0	0	0	0.211325	CG3061
CG3075	Nuclear factor Y-box C OS=Drosophila melanogaster GN=Nf-YC PE=1 SV=1	0	0	0	0	0	0	2	0	3	0	0.028	0	0	0	0	0	0	0	0.211325	CG3075
CG3082	Lethal (2) k09913, isoform D OS=Drosophila melanogaster GN=l(2)k09913 PE=2 SV=1	2	0	2	0	0.066	0	4	0	7	0	0.13	0	0	0	0	0	0	0	0.112702	CG3082
CG3086	MAP kinase-activated protein kinase 2 OS=Drosophila melanogaster GN=MAPk-Ak2 PE=1 SV=1	4	0	4	0	0.145	0	2	0	2	0	0.075	0	0	0	0	0	0	0	0.112702	CG3086
CG31040	Conserved oligomeric Golgi complex subunit 7 OS=Drosophila melanogaster GN=Cog7 PE=1 SV=2	0	0	0	0	0	0	2	0	2	0	0.038	0	0	0	0	0	0	0	0.211325	CG31040
CG31098	CG31098 OS=Drosophila melanogaster GN=CG31098 PE=2 SV=2	3	0	4	0	0.12	0	0	0	0	0	0	0	0	0	0	0	0	0	0.211325	CG31098
CG31108	CG31108 OS=Drosophila melanogaster GN=CG10057 PE=1 SV=1	0	0	0	0	0	0	4	0	6	0	0.044	0	0	0	0	0	0	0	0.211325	CG31108
CG31111	CG31111 OS=Drosophila melanogaster GN=CG31111 PE=1 SV=1	0	0	0	0	0	0	4	0	4	0	0.201	0	0	0	0	0	0	0	0.211325	CG31111
CG3114	Isoform H of DNA-binding protein Ewg OS=Drosophila melanogaster GN=ewg	0	0	0	0	0	0	2	0	3	0	0.047	0	0	0	0	0	0	0	0.211325	CG3114
CG31195	CG31195 OS=Drosophila melanogaster GN=CG31195-RA PE=1 SV=2	2	0	2	0	0.04	0	3	0	5	0	0.035	0	0	0	0	0	0	0	0.0996796	CG31195
CG31212	Putative DNA helicase Ino80 OS=Drosophila melanogaster GN=Ino80 PE=1 SV=2	2	0	3	0	0.016	0	4	0	5	0	0.038	0	0	0	0	0	0	0	0.112702	CG31212
CG31223	CG31223 OS=Drosophila melanogaster GN=syndapin PE=2 SV=1	2	0	3	0	0.085	0	0	0	0	0	0	0	0	0	0	0	0	0	0.211325	CG31223
CG3127	Phosphoglycerate kinase OS=Drosophila melanogaster GN=Pgk PE=2 SV=2	3	0	3	0	0.125	0	0	0	0	0	0	0	0	0	0	0	0	0	0.211325	CG3127
CG31289	BcDNA.LD12153 OS=Drosophila melanogaster GN=Dph5 PE=2 SV=2	2	0	2	0	0.139	0	3	0	3	0	0.192	0	0	0	0	0	0	0	0.0996796	CG31289
CG3129	GH11193p OS=Drosophila melanogaster GN=Rab-RP4 PE=2 SV=1	0	0	0	0	0	0	3	0	3	0	0.178	0	0	0	0	0	0	0	0.211325	CG3129
CG31301	CG31301 OS=Drosophila melanogaster GN=CG12258 PE=2 SV=2	4	0	4	0	0.121	0	0	0	0	0	0	0	0	0	0	0	0	0	0.211325	CG31301
CG31357	CG31357 OS=Drosophila melanogaster GN=CG13638 PE=1 SV=1	4	0	4	0	0.109	0	5	0	7	0	0.094	0	0	0	0	0	0	0	0.0942487	CG31357
CG31365	CG31365 OS=Drosophila melanogaster GN=CG31365 PE=1 SV=1	4	0	5	0	0.083	0	0	0	0	0	0	0	0	0	0	0	0	0	0.211325	CG31365
CG31391	AT27928p OS=Drosophila melanogaster GN=CG6471 PE=2 SV=1	0	0	0	0	0	0	2	0	2	0	0.033	0	0	0	0	0	0	0	0.211325	CG31391
CG31457	CG31457 OS=Drosophila melanogaster GN=CG4639 PE=1 SV=1	2	0	2	0	0.047	0	0	0	0	0	0	0	0	0	0	0	0	0	0.211325	CG31457
CG31510	CG31510 OS=Drosophila melanogaster GN=CG31510-RA PE=1 SV=2	0	0	0	0	0	0	2	0	2	0	0.019	0	0	0	0	0	0	0	0.211325	CG31510
CG31618;	Histone H2A OS=Drosophila melanogaster GN=His2A PE=1 SV=2	2	0	8	0	0.258	0	4	0	6	0	0.315	0	0	0	0	0	0	0	0.112702	CG31618;
CG3169	FI01013p OS=Drosophila melanogaster GN=Spt3 PE=1 SV=1	2	0	2	0	0.055	0	3	0	3	0	0.188	0	0	0	0	0	0	0	0.0996796	CG3169
CG31755	CG31755 OS=Drosophila melanogaster GN=CG31755 PE=2 SV=2	0	0	0	0	0	0	5	0	7	0	0.046	0	0	0	0	0	0	0	0.211325	CG31755
CG3178	Recombination repair protein 1 OS=Drosophila melanogaster GN=Rrp1 PE=1 SV=2	3	0	3	0	0.074	0	0	0	0	0	0	0	0	0	0	0	0	0	0.211325	CG3178
CG3181	Thymidylate synthase OS=Drosophila melanogaster GN=Ts PE=1 SV=2	2	0	6	0	0.062	0	0	0	0	0	0	0	0	0	0	0	0	0	0.211325	CG3181
CG3183	Geminin OS=Drosophila melanogaster GN=geminin PE=1 SV=1	2	0	2	0	0.292	0	0	0	0	0	0	0	0	0	0	0	0	0	0.211325	CG3183
CG3186	Eukaryotic translation initiation factor 5A OS=Drosophila melanogaster GN=eIF-5A PE=1 SV=2	9	0	9	0	0.522	0	0	0	0	0	0	0	0	0	0	0	0	0	0.211325	CG3186
CG31911	Equilibrative nucleoside transporter 2 OS=Drosophila melanogaster GN=Ent2 PE=1 SV=1	0	0	0	0	0	0	2	0	2	0	0.041	0	0	0	0	0	0	0	0.211325	CG31911
CG31937	CG31937 OS=Drosophila melanogaster GN=CG31937 PE=2 SV=1	0	0	0	0	0	0	2	0	4	0	0.115	0	0	0	0	0	0	0	0.211325	CG31937
CG31950	CG31950 OS=Drosophila melanogaster GN=CG31950-RA PE=2 SV=1	3	0	3	0	0.24	0	2	0	2	0	0.149	0	0	0	0	0	0	0	0.0996796	CG31950
CG31991	Midway, isoform D OS=Drosophila melanogaster GN=mdy PE=1 SV=1	0	0	0	0	0	0	3	0	3	0	0.042	0	0	0	0	0	0	0	0.211325	CG31991
CG32022	AT11343p OS=Drosophila melanogaster GN=CG32022 PE=2 SV=1	0	0	0	0	0	0	3	0	7	0	0.096	0	0	0	0	0	0	0	0.211325	CG32022
CG32031	Isoform B of Arginine kinase OS=Drosophila melanogaster GN=Argk	7	0	7	0	0.301	0	0	0	0	0	0	0	0	0	0	0	0	0	0.211325	CG32031
CG32066	CG32066, isoform B OS=Drosophila melanogaster GN=CG6491 PE=2 SV=1	2	0	2	0	0.046	0	5	0	6	0	0.13	0	0	0	0	0	0	0	0.124761	CG32066
CG32075	CG32075 OS=Drosophila melanogaster GN=CG6316 PE=2 SV=1	9	0	11	0	0.196	0	11	2	16	2	0.168	0.035	0	0	0	0	0	0	0.107434	CG32075
CG3209	CG3209, isoform C OS=Drosophila melanogaster GN=CG3209-RA PE=1 SV=2	0	0	0	0	0	0	3	2	4	3	0.054	0.031	0	0	0	0	0	0	0.398585	CG3209
CG32133	Ptip OS=Drosophila melanogaster GN=ptip PE=1 SV=3	2	0	2	0	0.017	0	0	0	0	0	0	0	0	0	0	0	0	0	0.211325	CG32133
CG32149	LD04071p OS=Drosophila melanogaster GN=RhoGAP71E PE=2 SV=2	3	0	4	0	0.112	0	0	0	0	0	0	0	0	0	0	0	0	0	0.211325	CG32149
CG32202	CG32202 OS=Drosophila melanogaster GN=CG32202 PE=2 SV=1	2	0	4	0	0.149	0	0	0	0	0	0	0	0	0	0	0	0	0	0.211325	CG32202
CG3221	Dim gamma-tubulin 3 OS=Drosophila melanogaster GN=dgt3 PE=2 SV=2	4	0	4	0	0.122	0	2	0	2	0	0.041	0	0	0	0	0	0	0	0.112702	CG3221
CG32243	CG32243 OS=Drosophila melanogaster GN=CG32243 PE=2 SV=1	3	0	3	0	0.14	0	6	0	12	0	0.167	0	0	0	0	0	0	0	0.112702	CG32243
CG3225	CG3225 OS=Drosophila melanogaster GN=CG3225 PE=1 SV=2	2	0	3	0	0.031	0	6	2	6	2	0.069	0.013	0	0	0	0	0	0	0.189265	CG3225
CG32251	Claspin homolog OS=Drosophila melanogaster GN=CG32251 PE=1 SV=1	0	0	0	0	0	0	2	0	2	0	0.014	0	0	0	0	0	0	0	0.211325	CG32251
CG3228	Probable ATP-dependent RNA helicase kurz OS=Drosophila melanogaster GN=kz PE=1 SV=1	2	0	3	0	0.01	0	0	0	0	0	0	0	0	0	0	0	0	0	0.211325	CG3228
CG3238	CG3238 OS=Drosophila melanogaster GN=CG3238 PE=2 SV=1	2	0	2	0	0.027	0	0	0	0	0	0	0	0	0	0	0	0	0	0.211325	CG3238
CG32409	CG32409 OS=Drosophila melanogaster GN=CG32409 PE=2 SV=2	7	4	13	10	0.218	0.175	0	0	0	0	0	0	0	0	0	0	0	0	0.366619	CG32409
CG32425	CG32425, isoform A OS=Drosophila melanogaster GN=CG32425 PE=2 SV=2	0	0	0	0	0	0	5	0	7	0	0.076	0	0	0	0	0	0	0	0.211325	CG32425
CG32484	LD11247p OS=Drosophila melanogaster GN=Sk2 PE=2 SV=3	0	0	0	0	0	0	2	0	3	0	0.033	0	0	0	0	0	0	0	0.211325	CG32484
CG32486	Cysteine and histidine-rich protein 1 homolog OS=Drosophila melanogaster GN=CG32486 PE=1 SV=2	0	0	0	0	0	0	4	0	4	0	0.107	0	0	0	0	0	0	0	0.211325	CG32486
CG32495	AT02852p OS=Drosophila melanogaster GN=GS PE=2 SV=2	0	0	0	0	0	0	2	0	2	0	0.108	0	0	0	0	0	0	0	0.211325	CG32495
CG32675	Transport and golgi organization 5, isoform A OS=Drosophila melanogaster GN=Tango5 PE=2 SV=1	0	0	0	0	0	0	7	0	9	0	0.136	0	0	0	0	0	0	0	0.211325	CG32675
CG32699	1-acylglycerophosphocholine O-acyltransferase 1 OS=Drosophila melanogaster GN=CG32699 PE=2 SV=1	0	0	0	0	0	0	3	0	3	0	0.039	0	0	0	0	0	0	0	0.211325	CG32699
CG32701	LD26546p OS=Drosophila melanogaster GN=l(1)G0320 PE=1 SV=1	5	0	6	0	0.129	0	6	0	7	0	0.129	0	0	0	0	0	0	0	0.0934283	CG32701
CG32721	Negative elongation factor B OS=Drosophila melanogaster GN=NELF-B PE=1 SV=1	7	0	9	0	0.146	0	6	0	8	0	0.136	0	0	0	0	0	0	0	0.0929542	CG32721
CG32742	Lethal (1) G0148 OS=Drosophila melanogaster GN=l(1)G0148 PE=1 SV=2	0	0	0	0	0	0	3	0	3	0	0.053	0	0	0	0	0	0	0	0.211325	CG32742
CG32767	CG32767, isoform C OS=Drosophila melanogaster GN=CG32767 PE=1 SV=2	2	0	2	0	0.042	0	0	0	0	0	0	0	0	0	0	0	0	0	0.211325	CG32767
CG32775	Galactosylgalactosylxylosylprotein 3-beta-glucuronosyltransferase I OS=Drosophila melanogaster GN=GlcAT-I PE=2 SV=2	0	0	0	0	0	0	2	0	3	0	0.137	0	0	0	0	0	0	0	0.211325	CG32775
CG32810	CG32810 OS=Drosophila melanogaster GN=CG32810-RB PE=1 SV=1	0	0	0	0	0	0	2	0	2	0	0.109	0	0	0	0	0	0	0	0.211325	CG32810
CG3284	DNA-directed RNA polymerase II subunit RPB9 OS=Drosophila melanogaster GN=RpII15 PE=1 SV=2	2	0	2	0	0.233	0	0	0	0	0	0	0	0	0	0	0	0	0	0.211325	CG3284
CG32859	AT15894p OS=Drosophila melanogaster GN=eIF4E-7 PE=1 SV=2	0	0	0	0	0	0	2	0	2	0	0.023	0	0	0	0	0	0	0	0.211325	CG32859
CG32904	Sequoia OS=Drosophila melanogaster GN=seq PE=4 SV=1	3	0	3	0	0.061	0	0	0	0	0	0	0	0	0	0	0	0	0	0.211325	CG32904
CG3295	CG3295 OS=Drosophila melanogaster GN=CG3295 PE=1 SV=1	2	0	3	0	0.081	0	2	0	4	0	0.062	0	0	0	0	0	0	0	0.0917517	CG3295
CG32955	CG33695, isoform C OS=Drosophila melanogaster GN=CG32955 PE=2 SV=1	4	0	4	0	0.202	0	3	0	4	0	0.129	0	0	0	0	0	0	0	0.0958548	CG32955
CG3298	Ribonuclease Z, mitochondrial OS=Drosophila melanogaster GN=JhI-1 PE=1 SV=2	0	0	0	0	0	0	3	0	3	0	0.048	0	0	0	0	0	0	0	0.211325	CG3298
CG3307	Histone-lysine N-methyltransferase pr-set7 OS=Drosophila melanogaster GN=pr-set7 PE=1 SV=2	3	0	3	0	0.048	0	2	0	3	0	0.051	0	0	0	0	0	0	0	0.0996796	CG3307
CG3309	CG3309 OS=Drosophila melanogaster GN=CG3309 PE=1 SV=1	0	0	0	0	0	0	2	0	3	0	0.047	0	0	0	0	0	0	0	0.211325	CG3309
CG33100	4EHP, isoform A OS=Drosophila melanogaster GN=4EHP PE=1 SV=1	0	0	0	0	0	0	3	0	5	0	0.139	0	0	0	0	0	0	0	0.211325	CG33100
CG3313	CG3313 OS=Drosophila melanogaster GN=CG3313 PE=2 SV=2	3	0	3	0	0.031	0	0	0	0	0	0	0	0	0	0	0	0	0	0.211325	CG3313
CG33140	AT21895p OS=Drosophila melanogaster GN=CG30384;CG30385;CG11074 PE=2 SV=1	0	0	0	0	0	0	3	0	3	0	0.012	0	0	0	0	0	0	0	0.211325	CG33140
CG33180	Ran-binding protein 16 OS=Drosophila melanogaster GN=Ranbp16 PE=2 SV=1	10	0	13	0	0.138	0	7	0	7	0	0.063	0	0	0	0	0	0	0	0.0979638	CG33180
CG33213	CG33213 OS=Drosophila melanogaster GN=CG12260 PE=1 SV=1	0	0	0	0	0	0	2	0	2	0	0.062	0	0	0	0	0	0	0	0.211325	CG33213
CG33214	CG33214 OS=Drosophila melanogaster GN=CG33214 PE=1 SV=2	4	0	5	0	0.055	0	8	0	10	0	0.101	0	0	0	0	0	0	0	0.112702	CG33214
CG33230	CG33230 OS=Drosophila melanogaster GN=CG33230-RA PE=2 SV=1	0	0	0	0	0	0	2	0	2	0	0.076	0	0	0	0	0	0	0	0.211325	CG33230
CG33336	GH11591p OS=Drosophila melanogaster GN=p53 PE=1 SV=1	0	0	0	0	0	0	4	0	4	0	0.104	0	0	0	0	0	0	0	0.211325	CG33336
CG33526	PNUTS, isoform D OS=Drosophila melanogaster GN=PNUTS PE=1 SV=1	3	0	3	0	0.029	0	0	0	0	0	0	0	0	0	0	0	0	0	0.211325	CG33526
CG3356	CG3356 OS=Drosophila melanogaster GN=CG3356 PE=1 SV=1	0	0	0	0	0	0	4	0	6	0	0.053	0	0	0	0	0	0	0	0.211325	CG3356
CG3363	CG3363 OS=Drosophila melanogaster GN=CG3363 PE=1 SV=1	2	0	2	0	0.011	0	0	0	0	0	0	0	0	0	0	0	0	0	0.211325	CG3363
CG3368	CG3368 OS=Drosophila melanogaster GN=CG3368 PE=2 SV=2	2	0	3	0	0.046	0	0	0	0	0	0	0	0	0	0	0	0	0	0.211325	CG3368
CG33694	CENP-ana OS=Drosophila melanogaster GN=cana PE=1 SV=2	6	0	6	0	0.05	0	3	0	5	0	0.018	0	0	0	0	0	0	0	0.112702	CG33694
CG33853	Histone H2A OS=Drosophila melanogaster GN=His2A:CG33856 PE=3 SV=1	2	0	8	0	0.258	0	4	0	6	0	0.315	0	0	0	0	0	0	0	0.112702	CG33853
CG33931	Rpp20 OS=Drosophila melanogaster GN=Rpp20 PE=1 SV=1	2	0	3	0	0.263	0	0	0	0	0	0	0	0	0	0	0	0	0	0.211325	CG33931
CG33934	CG33934, isoform E OS=Drosophila melanogaster GN=CG33934 PE=4 SV=1	0	0	0	0	0	0	2	0	2	0	0.04	0	0	0	0	0	0	0	0.211325	CG33934
CG33957	Cp309, isoform B OS=Drosophila melanogaster GN=cp309 PE=4 SV=1	0	0	0	0	0	0	2	0	2	0	0.007	0	0	0	0	0	0	0	0.211325	CG33957
CG33979	Adenylyl cyclase-associated protein OS=Drosophila melanogaster GN=capt PE=1 SV=2	3	0	3	0	0.031	0	3	2	4	2	0.146	0.026	0	0	0	0	0	0	0.168947	CG33979
CG34015	CG34015 OS=Drosophila melanogaster GN=CG34015-RA PE=2 SV=1	0	0	0	0	0	0	2	0	2	0	0.144	0	0	0	0	0	0	0	0.211325	CG34015
CG3403	Mps one binder kinase activator-like 4 OS=Drosophila melanogaster GN=Mob4 PE=1 SV=1	4	0	6	0	0.202	0	3	0	3	0	0.139	0	0	0	0	0	0	0	0.0958548	CG3403
CG34069	Cytochrome c oxidase subunit 2 OS=Drosophila melanogaster GN=mt:CoII PE=3 SV=1	0	0	0	0	0	0	4	0	5	0	0.162	0	0	0	0	0	0	0	0.211325	CG34069
CG3412	LD08669p OS=Drosophila melanogaster GN=slmb PE=1 SV=1	8	0	10	0	0.159	0	4	2	4	3	0.073	0.022	0	0	0	0	0	0	0.141618	CG3412
CG34186	CG34186 OS=Drosophila melanogaster GN=Rpb12 PE=4 SV=1	0	0	0	0	0	0	2	0	2	0	0.14	0	0	0	0	0	0	0	0.211325	CG34186
CG34214	CG34214 OS=Drosophila melanogaster GN=CG4806-RA PE=2 SV=1	0	0	0	0	0	0	3	0	3	0	0.162	0	0	0	0	0	0	0	0.211325	CG34214
CG3437	CG3437 OS=Drosophila melanogaster GN=CG3437 PE=4 SV=2	6	0	8	0	0.189	0	5	0	6	0	0.054	0	0	0	0	0	0	0	0.0934283	CG3437
CG34401	CG34401 OS=Drosophila melanogaster GN=CG34401 PE=1 SV=2	0	0	0	0	0	0	2	0	2	0	0.018	0	0	0	0	0	0	0	0.211325	CG34401
CG3448	CG3448 OS=Drosophila melanogaster GN=CG3448 PE=1 SV=1	0	0	0	0	0	0	2	0	2	0	0.072	0	0	0	0	0	0	0	0.211325	CG3448
CG3457	CG3457 OS=Drosophila melanogaster GN=EG:17E2.1 PE=2 SV=1	3	0	4	0	0.057	0	0	0	0	0	0	0	0	0	0	0	0	0	0.211325	CG3457
CG3500	CG3500 OS=Drosophila melanogaster GN=CG3500-RA PE=2 SV=1	0	0	0	0	0	0	2	0	3	0	0.056	0	0	0	0	0	0	0	0.211325	CG3500
CG3509	CG3509 OS=Drosophila melanogaster GN=CG3509 PE=1 SV=1	3	0	4	0	0.15	0	3	0	4	0	0.082	0	0	0	0	0	0	0	0.0917517	CG3509
CG3523	CG3523, isoform A OS=Drosophila melanogaster GN=CG3523 PE=2 SV=1	2	0	2	0	0.022	0	2	0	2	0	0.011	0	0	0	0	0	0	0	0.0917517	CG3523
CG3532	CG3532 OS=Drosophila melanogaster GN=CG3532-RB PE=1 SV=3	3	0	4	0	0.059	0	0	0	0	0	0	0	0	0	0	0	0	0	0.211325	CG3532
CG3613	GH05812p OS=Drosophila melanogaster GN=qkr58E-1 PE=1 SV=1	0	0	0	0	0	0	2	0	2	0	0.051	0	0	0	0	0	0	0	0.211325	CG3613
CG3644	Beta NAC homolog OS=Drosophila melanogaster GN=bic PE=1 SV=1	4	0	7	0	0.408	0	0	0	0	0	0	0	0	0	0	0	0	0	0.211325	CG3644
CG3647	Protein shuttle craft OS=Drosophila melanogaster GN=stc PE=1 SV=2	2	0	2	0	0.052	0	0	0	0	0	0	0	0	0	0	0	0	0	0.211325	CG3647
CG3652	CG3652 OS=Drosophila melanogaster GN=CG3652 PE=1 SV=2	0	0	0	0	0	0	2	0	2	0	0.152	0	0	0	0	0	0	0	0.211325	CG3652
CG3665	Isoform 3 of Fasciclin-2 OS=Drosophila melanogaster GN=Fas2	0	0	0	0	0	0	3	0	3	0	0.052	0	0	0	0	0	0	0	0.211325	CG3665
CG3679	CG3679 OS=Drosophila melanogaster GN=CG3679 PE=1 SV=1	3	0	3	0	0.084	0	4	0	8	0	0.101	0	0	0	0	0	0	0	0.0958548	CG3679
CG3702	CG3702 OS=Drosophila melanogaster GN=CG3702 PE=2 SV=2	3	0	3	0	0.084	0	7	0	8	0	0.076	0	0	0	0	0	0	0	0.120951	CG3702
CG3722	DE-cadherin OS=Drosophila melanogaster GN=shg PE=1 SV=2	0	0	0	0	0	0	3	0	3	0	0.025	0	0	0	0	0	0	0	0.211325	CG3722
CG3775	CG3775 OS=Drosophila melanogaster GN=CG3775-RA PE=2 SV=1	0	0	0	0	0	0	2	0	2	0	0.031	0	0	0	0	0	0	0	0.211325	CG3775
CG3815	CG3815 OS=Drosophila melanogaster GN=CG3815 PE=1 SV=2	6	0	10	0	0.141	0	11	4	16	5	0.196	0.032	0	0	0	0	0	0	0.153578	CG3815
[truncated: 423 more rows]

## Sheet: present in all GAF IP probes
		Peptide count	Peptide count	Spectral count	Spectral count	Seqcov	Seqcov	Peptide count	Peptide count	Spectral count	Spectral count	Seqcov	Seqcov	Peptide count	Peptide count	Spectral count	Spectral count	Seqcov	Seqcov
Gene names (ORF )	description	GAF IP 1	Mock 1	GAF IP 1	Mock 1	GAF IP 1	Mock 1	GAF IP 2	Mock 2	GAF IP 2	Mock 2	GAF IP 2	Mock 2	GAF IP 3	Mock 3	GAF IP 3	Mock 3	GAF IP 3	Mock 3	P-value	Gene names (ORF )
CG4264	Heat shock 70 kDa protein cognate 4 OS=Drosophila melanogaster GN=Hsc70-4 PE=1 SV=3	95	22	330	60	0.687	0.315	133	14	559	28	0.817	0.141	146	37	678	316	0.68	0.309	0.00592256	CG4264
CG11064	Apolipophorins OS=Drosophila melanogaster GN=Rfabg PE=1 SV=2	141	2	274	7	0.381	0.009	174	20	270	29	0.397	0.046	129	29	392	99	0.277	0.068	0.00132033	CG11064
CG1242	Heat shock protein 83 OS=Drosophila melanogaster GN=Hsp83 PE=1 SV=1	94	0	393	0	0.647	0	155	15	368	29	0.66	0.1	98	10	351	32	0.53	0.113	0.0136365	CG1242
CG8280	Elongation factor 1-alpha 1 OS=Drosophila melanogaster GN=Ef1alpha48D PE=1 SV=2	55	12	1169	205	0.667	0.292	199	13	939	36	0.806	0.136	95	18	579	150	0.629	0.279	0.0701841	CG8280
CG7507	Dynein heavy chain, cytoplasmic OS=Drosophila melanogaster GN=Dhc64C PE=2 SV=2	95	0	113	0	0.261	0	217	9	353	10	0.384	0.018	95	5	204	10	0.205	0.01	0.0418787	CG7507
CG11888	26S proteasome non-ATPase regulatory subunit 1 OS=Drosophila melanogaster GN=Rpn2 PE=1 SV=1	77	2	194	5	0.554	0.025	140	10	362	13	0.698	0.065	90	7	341	23	0.459	0.068	0.018044	CG11888
CG9277	Tubulin beta-1 chain OS=Drosophila melanogaster GN=betaTub56D PE=1 SV=2	67	11	1607	49	0.756	0.362	169	19	769	46	0.826	0.183	88	16	799	234	0.685	0.204	0.0478768	CG9277
CG7961	Alpha-coatomer protein, isoform A OS=Drosophila melanogaster GN=alphaCop PE=1 SV=1	46	2	66	4	0.337	0.017	118	11	206	14	0.588	0.071	82	9	293	35	0.379	0.074	0.0335727	CG7961
CG11856	Nup358 OS=Drosophila melanogaster GN=Nup358 PE=1 SV=2	78	0	108	0	0.334	0	95	12	189	19	0.346	0.034	72	12	178	32	0.188	0.041	0.00101093	CG11856
CG10811	Eukaryotic translation initiation factor 4G, isoform A OS=Drosophila melanogaster GN=eIF4G PE=1 SV=3	80	0	146	0	0.453	0	99	8	169	13	0.438	0.033	68	9	152	39	0.352	0.052	0.0042773	CG10811
CG8863	DnaJ-like-2, isoform A OS=Drosophila melanogaster GN=Droj2 PE=2 SV=1	59	4	463	10	0.777	0.129	76	2	190	2	0.739	0.032	68	4	335	11	0.571	0.122	0.00255458	CG8863
CG8977	T-complex protein 1 subunit gamma OS=Drosophila melanogaster GN=Cctgamma PE=2 SV=2	61	0	179	0	0.717	0	87	11	226	18	0.665	0.16	67	11	269	31	0.572	0.189	0.0030813	CG8977
CG8308	Tubulin alpha-4 chain OS=Drosophila melanogaster GN=alphaTub67C PE=1 SV=1	51	0	337	0	0.682	0	79	6	346	9	0.645	0.113	66	6	229	49	0.511	0.13	0.00648681	CG8308
CG7762	26S proteasome regulatory complex subunit p97 OS=Drosophila melanogaster GN=Rpn1 PE=1 SV=2	64	5	187	18	0.511	0.066	135	6	437	12	0.645	0.042	66	5	177	17	0.387	0.036	0.0353781	CG7762
CG18740	Brahma associated protein 155 kDa OS=Drosophila melanogaster GN=mor PE=2 SV=3	53	0	115	0	0.452	0	104	16	179	48	0.476	0.099	65	13	152	55	0.334	0.071	0.0211322	CG18740
CG8625	Chromatin-remodeling complex ATPase chain Iswi OS=Drosophila melanogaster GN=Iswi PE=1 SV=1	57	2	103	3	0.42	0.023	102	23	166	52	0.489	0.126	65	12	143	61	0.384	0.098	0.0154123	CG8625
CG6699	Coatomer subunit beta' OS=Drosophila melanogaster GN=beta'Cop PE=2 SV=2	38	0	69	0	0.396	0	93	11	175	22	0.534	0.104	64	10	194	47	0.406	0.093	0.030681	CG6699
CG14648	Growl, isoform A OS=Drosophila melanogaster GN=growl PE=1 SV=1	48	4	268	13	0.528	0.073	64	4	117	13	0.613	0.044	60	10	205	18	0.517	0.174	0.00177808	CG14648
CG33261	Isoform B of Transcription factor GAGA OS=Drosophila melanogaster GN=Trl	144	3	1331	14	0.846	0.116	96	0	219	0	0.463	0	60	0	183	0	0.408	0	0.0276	CG33261
CG5394	Bifunctional aminoacyl-tRNA synthetase OS=Drosophila melanogaster GN=Aats-glupro PE=1 SV=2	71	0	108	0	0.368	0	118	5	183	5	0.53	0.026	59	7	119	13	0.303	0.036	0.0234551	CG5394
CG4027	Actin-5C OS=Drosophila melanogaster GN=Act5C PE=1 SV=4	23	4	80	4	0.511	0.09	83	25	535	43	0.702	0.346	56	16	366	90	0.564	0.293	0.0712977	CG4027
CG12051	Actin-42A OS=Drosophila melanogaster GN=Act42A PE=1 SV=3	23	4	66	4	0.511	0.09	73	25	526	44	0.697	0.346	56	16	366	90	0.564	0.293	0.0607507	CG12051
CG11397	Condensin subunit SMC4 OS=Drosophila melanogaster GN=glu PE=2 SV=1	43	0	71	0	0.337	0	77	14	115	17	0.465	0.078	55	6	100	15	0.326	0.037	0.0113608	CG11397
CG5374	T-complex protein 1 subunit alpha OS=Drosophila melanogaster GN=T-cp1 PE=2 SV=2	41	0	126	0	0.68	0	82	8	193	10	0.686	0.115	55	4	136	9	0.533	0.065	0.0199866	CG5374
CG9359	Tubulin beta-2 chain OS=Drosophila melanogaster GN=betaTub85D PE=1 SV=1	36	4	722	36	0.446	0.094	65	8	395	22	0.493	0.07	54	8	337	185	0.39	0.105	0.0154559	CG9359
CG8231	GH13725p OS=Drosophila melanogaster GN=Tcp-1zeta PE=2 SV=1	52	4	168	13	0.583	0.098	63	7	229	13	0.61	0.096	54	8	179	27	0.402	0.128	0.000987024	CG8231
CG11375	Polybromo OS=Drosophila melanogaster GN=polybromo PE=2 SV=1	51	0	73	0	0.378	0	80	11	130	24	0.388	0.052	54	4	127	18	0.236	0.027	0.00841185	CG11375
CG3455	Rpt4 OS=Drosophila melanogaster GN=Rpt4 PE=1 SV=2	35	9	187	37	0.651	0.269	59	5	163	15	0.754	0.113	53	4	177	12	0.618	0.085	0.0114951	CG3455
CG1100	GH11341p OS=Drosophila melanogaster GN=Rpn5 PE=1 SV=1	60	0	128	0	0.639	0	62	10	136	15	0.546	0.131	52	6	144	18	0.46	0.122	0.00011988	CG1100
CG1913	Tubulin alpha-1 chain OS=Drosophila melanogaster GN=alphaTub84B PE=2 SV=1	57	8	993	20	0.82	0.247	131	22	838	41	0.844	0.24	51	12	232	109	0.453	0.16	0.0608931	CG1913
CG2512	Tubulin alpha-3 chain OS=Drosophila melanogaster GN=alphaTub84D PE=1 SV=1	56	8	992	20	0.773	0.247	127	22	831	41	0.776	0.24	51	12	232	109	0.453	0.16	0.0585555	CG2512
CG32346	Isoform B of Nucleosome-remodeling factor subunit NURF301 OS=Drosophila melanogaster GN=E(bx)	47	2	70	3	0.213	0.017	73	9	109	25	0.284	0.022	51	6	101	11	0.181	0.019	0.00945425	CG32346
CG32346,	Nucleosome-remodeling factor subunit NURF301 OS=Drosophila melanogaster GN=E(bx) PE=1 SV=2	47	2	70	3	0.211	0.017	73	9	109	25	0.284	0.022	51	6	101	11	0.181	0.019	0.00945425	CG32346,
CG11471	Isoleucyl-tRNA synthetase, isoform A OS=Drosophila melanogaster GN=Aats-ile PE=1 SV=1	51	6	65	11	0.386	0.058	67	5	99	7	0.414	0.028	51	4	100	16	0.265	0.033	0.00498086	CG11471
CG7033	CG7033, isoform C OS=Drosophila melanogaster GN=CG7033 PE=3 SV=1	50	9	125	17	0.653	0.229	48	0	98	0	0.636	0	51	3	141	14	0.54	0.054	0.00074295	CG7033
CG4954	Eukaryotic translation initiation factor 3 subunit C OS=Drosophila melanogaster GN=eIF3-S8 PE=1 SV=1	43	0	72	0	0.408	0	86	8	168	10	0.495	0.058	50	4	135	7	0.289	0.041	0.0245289	CG4954
CG7070	Pyruvate kinase OS=Drosophila melanogaster GN=PyK PE=2 SV=2	38	2	81	6	0.565	0.06	84	7	200	10	0.692	0.073	49	4	170	19	0.471	0.056	0.0306882	CG7070
CG1873	Elongation factor 1-alpha 2 OS=Drosophila melanogaster GN=Ef1alpha100E PE=1 SV=2	28	8	874	194	0.381	0.175	65	10	358	31	0.442	0.082	48	11	242	106	0.361	0.139	0.0360896	CG1873
CG1341	26S proteasome regulatory complex subunit p48B OS=Drosophila melanogaster GN=Rpt1 PE=1 SV=1	48	3	245	7	0.647	0.099	72	5	181	17	0.711	0.062	48	10	131	33	0.67	0.173	0.00962773	CG1341
CG4147	Heat shock 70 kDa protein cognate 3 OS=Drosophila melanogaster GN=Hsc70-3 PE=2 SV=2	45	9	123	25	0.488	0.152	58	15	129	20	0.465	0.204	47	9	207	28	0.442	0.152	0.00179269	CG4147
CG6223	Coatomer subunit beta OS=Drosophila melanogaster GN=betaCop PE=1 SV=2	45	0	115	0	0.428	0	83	3	203	3	0.461	0.031	47	8	140	16	0.337	0.073	0.0216091	CG6223
CG8571	Smallminded, isoform A OS=Drosophila melanogaster GN=smid PE=1 SV=1	50	0	176	0	0.475	0	121	11	287	44	0.606	0.083	47	6	120	22	0.382	0.05	0.0534488	CG8571
CG1616	DNA replication licensing factor MCM4 OS=Drosophila melanogaster GN=dpa PE=1 SV=2	53	3	89	13	0.575	0.035	70	5	120	7	0.658	0.046	47	3	120	6	0.371	0.027	0.00788632	CG1616
CG6779	40S ribosomal protein S3 OS=Drosophila melanogaster GN=RpS3 PE=1 SV=1	38	7	191	26	0.642	0.297	56	9	126	12	0.768	0.191	46	19	203	81	0.785	0.496	0.00361614	CG6779
CG42641	Probable 26S proteasome non-ATPase regulatory subunit 3 OS=Drosophila melanogaster GN=Rpn3 PE=1 SV=1	47	7	85	14	0.595	0.217	77	7	169	8	0.66	0.16	46	7	105	16	0.504	0.15	0.0197345	CG42641
CG6958	LP09464p OS=Drosophila melanogaster GN=Nup133 PE=2 SV=2	38	0	67	0	0.359	0	95	10	210	20	0.498	0.07	46	4	174	10	0.289	0.033	0.0435997	CG6958
CG6743	BcDNA.LD18761 OS=Drosophila melanogaster GN=Nup107 PE=1 SV=1	39	4	97	11	0.488	0.062	90	2	150	2	0.621	0.018	46	3	111	11	0.375	0.032	0.0369476	CG6743
CG9805	Eukaryotic translation initiation factor 3 subunit A OS=Drosophila melanogaster GN=eIF3-S10 PE=1 SV=1	51	5	90	9	0.377	0.047	75	3	116	5	0.399	0.027	46	3	101	9	0.295	0.024	0.0130785	CG9805
CG4916	Putative ATP-dependent RNA helicase me31b OS=Drosophila melanogaster GN=me31B PE=1 SV=3	27	0	38	0	0.545	0	78	2	179	4	0.704	0.037	46	0	127	0	0.351	0	0.0394773	CG4916
CG10067	Actin 57B, isoform C OS=Drosophila melanogaster GN=Act57B PE=3 SV=1	16	0	31	0	0.411	0	50	18	137	35	0.633	0.225	45	13	198	79	0.558	0.258	0.055807	CG10067
CG5942	Isoform C of ATP-dependent helicase brm OS=Drosophila melanogaster GN=brm	33	0	55	0	0.245	0	63	11	112	11	0.248	0.047	45	5	97	11	0.187	0.032	0.0147494	CG5942
CG6476	Isoform C of Eukaryotic translation initiation factor 2 subunit 3 OS=Drosophila melanogaster GN=Su(var)3-9	32	4	61	10	0.499	0.137	59	0	102	0	0.617	0	45	5	88	18	0.442	0.103	0.0142358	CG6476
CG12225	Transcription elongation factor SPT6 OS=Drosophila melanogaster GN=Spt6 PE=1 SV=1	8	0	8	0	0.056	0	88	7	130	8	0.328	0.037	44	4	88	6	0.2	0.015	0.101671	CG12225
CG18290	Actin-87E OS=Drosophila melanogaster GN=Act87E PE=1 SV=1	16	0	31	0	0.394	0	48	18	135	35	0.569	0.215	43	13	195	78	0.497	0.234	0.0542503	CG18290
CG6841	CG6841 OS=Drosophila melanogaster GN=CG6841 PE=1 SV=2	47	5	78	9	0.441	0.064	84	8	158	12	0.584	0.045	43	8	102	26	0.35	0.079	0.0294426	CG6841
CG16916	26S proteasome regulatory complex subunit p48A OS=Drosophila melanogaster GN=Rpt3 PE=1 SV=1	57	2	365	3	0.738	0.051	67	5	149	6	0.881	0.068	43	6	134	20	0.47	0.082	0.00784496	CG16916
CG5178	Actin, indirect flight muscle OS=Drosophila melanogaster GN=Act88F PE=1 SV=1	14	0	28	0	0.25	0	38	18	82	35	0.566	0.215	42	13	193	78	0.471	0.234	0.0621558	CG5178
CG1119	Replication factor C subunit 1 OS=Drosophila melanogaster GN=Gnf1 PE=1 SV=2	65	5	130	8	0.44	0.065	82	14	137	24	0.447	0.109	42	8	112	35	0.312	0.083	0.0187241	CG1119
CG10212	SMC2 OS=Drosophila melanogaster GN=SMC2 PE=2 SV=1	47	0	65	0	0.465	0	51	4	82	4	0.385	0.02	42	6	68	20	0.299	0.046	0.000173737	CG10212
CG4738	Nuclear pore complex protein Nup160 homolog OS=Drosophila melanogaster GN=Nup160 PE=1 SV=1	46	0	95	0	0.392	0	69	10	107	17	0.315	0.045	42	5	90	11	0.21	0.025	0.0104865	CG4738
CG1782	Ubiquitin-activating enzyme E1 OS=Drosophila melanogaster GN=Uba1 PE=1 SV=1	60	0	161	0	0.608	0	86	10	179	13	0.509	0.066	42	2	88	9	0.27	0.015	0.0190336	CG1782
CG1710	Host cell factor OS=Drosophila melanogaster GN=Hcf PE=1 SV=2	54	0	94	0	0.41	0	68	17	110	27	0.452	0.094	41	15	85	35	0.255	0.106	0.00657157	CG1710
CG6944	Lamin Dm0 OS=Drosophila melanogaster GN=Lam PE=1 SV=4	61	4	112	10	0.574	0.098	41	13	81	28	0.523	0.117	41	15	89	82	0.447	0.207	0.00813012	CG6944
CG8258	CG8258 OS=Drosophila melanogaster GN=CG8258 PE=2 SV=1	46	8	128	17	0.626	0.189	73	13	151	24	0.674	0.15	41	8	122	28	0.52	0.114	0.0223559	CG8258
CG5000	LP04448p OS=Drosophila melanogaster GN=msps PE=1 SV=3	39	0	57	0	0.245	0	67	5	113	7	0.326	0.022	41	4	82	10	0.206	0.018	0.0166346	CG5000
CG4978	DNA replication licensing factor Mcm7 OS=Drosophila melanogaster GN=Mcm7 PE=1 SV=1	46	3	92	6	0.56	0.053	55	2	87	3	0.526	0.021	41	0	87	0	0.467	0	0.00302326	CG4978
CG31671	Tho2, isoform B OS=Drosophila melanogaster GN=tho2 PE=4 SV=1	45	0	71	0	0.285	0	56	8	84	9	0.294	0.029	40	5	81	13	0.227	0.037	0.00217172	CG31671
CG4466	Heat shock protein 27 OS=Drosophila melanogaster GN=Hsp27 PE=1 SV=2	27	6	278	62	0.69	0.296	40	6	339	14	0.714	0.174	40	5	252	38	0.535	0.192	0.00986444	CG4466
CG5949	DNA polymerase delta catalytic subunit OS=Drosophila melanogaster GN=DNApol-delta PE=1 SV=2	38	0	71	0	0.315	0	64	2	103	4	0.436	0.017	40	4	90	9	0.284	0.03	0.015159	CG5949
CG9088	Lysine-specific demethylase lid OS=Drosophila melanogaster GN=lid PE=1 SV=1	49	0	70	0	0.331	0	71	4	118	6	0.301	0.025	40	0	76	0	0.243	0	0.0139237	CG9088
CG10988	Gamma-tubulin complex component 3 homolog OS=Drosophila melanogaster GN=l(1)dd4 PE=1 SV=2	39	0	63	0	0.423	0	57	4	84	11	0.42	0.027	40	0	95	0	0.289	0	0.00682679	CG10988
CG34412	LD15160p OS=Drosophila melanogaster GN=tlk PE=2 SV=1	34	0	92	0	0.308	0	35	0	66	0	0.263	0	40	0	88	0	0.241	0	0.00129952	CG34412
CG9373	Rumpelstiltskin OS=Drosophila melanogaster GN=rump PE=1 SV=1	21	0	52	0	0.255	0	30	6	46	8	0.297	0.054	39	8	99	24	0.324	0.111	0.0121987	CG9373
CG8351	LD47396p OS=Drosophila melanogaster GN=Tcp-1eta PE=2 SV=2	52	2	143	5	0.757	0.048	67	3	120	4	0.724	0.037	39	3	108	14	0.445	0.057	0.0125139	CG8351
CG1489	26S protease regulatory subunit 8 OS=Drosophila melanogaster GN=Pros45 PE=1 SV=2	33	4	93	12	0.516	0.126	64	5	155	9	0.723	0.121	39	3	141	6	0.516	0.054	0.0242152	CG1489
CG7478	Actin, larval muscle OS=Drosophila melanogaster GN=Act79B PE=2 SV=2	15	0	30	0	0.319	0	46	18	131	35	0.543	0.215	38	12	170	71	0.463	0.202	0.0578238	CG7478
CG9281	CG9281, isoform B OS=Drosophila melanogaster GN=CG9281 PE=1 SV=1	57	10	292	23	0.538	0.177	76	19	212	40	0.507	0.16	38	8	238	62	0.37	0.103	0.0226107	CG9281
CG10149	26S proteasome regulatory complex subunit p42B OS=Drosophila melanogaster GN=Rpn6 PE=1 SV=1	53	7	104	16	0.699	0.13	46	4	91	8	0.571	0.045	38	6	100	30	0.491	0.123	0.00464925	CG10149
CG3210	Dynamin related protein 1 OS=Drosophila melanogaster GN=Drp1 PE=2 SV=1	53	5	102	8	0.51	0.072	65	4	102	8	0.578	0.039	38	5	101	31	0.388	0.084	0.0129913	CG3210
CG4878	Eukaryotic translation initiation factor 3 subunit B OS=Drosophila melanogaster GN=eIF3-S9 PE=1 SV=1	34	4	74	10	0.417	0.061	64	10	93	12	0.481	0.097	38	4	84	8	0.328	0.049	0.0236585	CG4878
CG8184	CG8184 OS=Drosophila melanogaster GN=CG8184 PE=1 SV=2	9	0	11	0	0.041	0	60	0	86	0	0.15	0	38	0	61	0	0.09	0	0.0685344	CG8184
CG1453	Kinesin-like protein Klp10A OS=Drosophila melanogaster GN=Klp10A PE=1 SV=1	44	0	153	0	0.528	0	52	5	77	7	0.524	0.053	37	4	95	17	0.352	0.037	0.00292068	CG1453
CG17566	Tubulin gamma-2 chain OS=Drosophila melanogaster GN=gammaTub37C PE=1 SV=3	41	5	102	11	0.7	0.14	71	8	160	18	0.786	0.12	37	3	104	13	0.51	0.044	0.025764	CG17566
CG9476	Tubulin alpha-2 chain OS=Drosophila melanogaster GN=alphaTub85E PE=1 SV=1	30	5	685	11	0.421	0.154	70	9	621	15	0.428	0.167	36	10	182	88	0.292	0.129	0.0467299	CG9476
CG2168	40S ribosomal protein S3a OS=Drosophila melanogaster GN=RpS3A PE=1 SV=4	52	7	153	35	0.649	0.347	63	18	226	39	0.765	0.257	36	8	115	75	0.53	0.194	0.0115836	CG2168
CG4799	Importin subunit alpha OS=Drosophila melanogaster GN=Pen PE=1 SV=2	46	8	828	29	0.644	0.241	81	8	294	16	0.69	0.094	36	6	148	65	0.439	0.123	0.0372817	CG4799
CG6258	Replication factor C 38kD subunit OS=Drosophila melanogaster GN=RfC38 PE=1 SV=1	32	5	199	11	0.596	0.16	52	5	113	16	0.677	0.098	36	5	107	36	0.438	0.132	0.0145751	CG6258
CG2238	Isoform B of Elongation factor 2 OS=Drosophila melanogaster GN=Ef2b	50	13	88	27	0.547	0.175	64	5	130	5	0.578	0.036	36	4	76	14	0.328	0.044	0.0119587	CG2238
CG7752	LD15904p OS=Drosophila melanogaster GN=pzg PE=1 SV=1	48	0	124	0	0.379	0	47	9	71	19	0.331	0.06	36	4	92	14	0.229	0.053	0.00092207	CG7752
CG33123	CG33123 OS=Drosophila melanogaster GN=CG33123 PE=3 SV=2	54	0	120	0	0.502	0	54	3	91	3	0.415	0.02	36	0	73	0	0.29	0	0.00699307	CG33123
CG6148	EH domain containing protein OS=Drosophila melanogaster GN=Past1 PE=2 SV=1	49	0	74	0	0.62	0	90	2	209	2	0.753	0.043	35	6	114	14	0.429	0.092	0.0384915	CG6148
CG5289	26S protease regulatory subunit 4 OS=Drosophila melanogaster GN=Pros26.4 PE=1 SV=2	35	4	82	6	0.615	0.089	63	5	164	5	0.615	0.096	35	4	123	25	0.478	0.082	0.0250997	CG5289
CG15100	CG15100 OS=Drosophila melanogaster GN=CG15100 PE=3 SV=1	60	2	89	3	0.577	0.035	77	10	134	11	0.612	0.057	35	3	68	5	0.355	0.039	0.0226244	CG15100
CG9802	Chromosome-associated protein, isoform A OS=Drosophila melanogaster GN=Cap PE=1 SV=2	51	0	75	0	0.396	0	65	6	88	11	0.402	0.051	35	3	71	10	0.258	0.022	0.0140012	CG9802
CG7035	Nuclear cap-binding protein subunit 1 OS=Drosophila melanogaster GN=Cbp80 PE=1 SV=1	32	0	60	0	0.369	0	56	0	117	0	0.364	0	35	3	105	4	0.26	0.03	0.0159729	CG7035
CG3917	Gamma-tubulin ring protein 84, isoform E OS=Drosophila melanogaster GN=Grip84 PE=4 SV=1	35	0	54	0	0.409	0	57	6	92	10	0.506	0.044	35	2	90	15	0.292	0.016	0.0135248	CG3917
CG5931	Putative U5 small nuclear ribonucleoprotein 200 kDa helicase OS=Drosophila melanogaster GN=CG5931 PE=2 SV=4	34	0	48	0	0.215	0	68	0	108	0	0.276	0	35	0	77	0	0.145	0	0.0274738	CG5931
CG18572	CAD protein OS=Drosophila melanogaster GN=r PE=1 SV=3	24	0	38	0	0.142	0	62	0	101	0	0.263	0	35	0	82	0	0.153	0	0.0350965	CG18572
CG7269	ATP-dependent RNA helicase WM6 OS=Drosophila melanogaster GN=Hel25E PE=1 SV=1	32	2	150	12	0.528	0.057	58	5	196	6	0.616	0.052	35	0	172	0	0.38	0	0.0187102	CG7269
CG7490	60S acidic ribosomal protein P0 OS=Drosophila melanogaster GN=RpLP0 PE=1 SV=1	20	7	57	24	0.492	0.259	32	12	67	19	0.514	0.233	34	12	98	70	0.29	0.199	0.0194723	CG7490
CG1966	ATP-dependent chromatin assembly factor large subunit OS=Drosophila melanogaster GN=Acf1 PE=2 SV=1	39	0	49	0	0.266	0	74	13	136	20	0.384	0.051	34	9	72	35	0.223	0.057	0.0348027	CG1966
CG8142	CG8142 OS=Drosophila melanogaster GN=CG8142 PE=1 SV=2	29	6	67	10	0.581	0.17	51	4	97	7	0.547	0.082	34	8	87	42	0.433	0.15	0.0186459	CG8142
CG8858	Proteasome-associated protein ECM29 homolog OS=Drosophila melanogaster GN=CG8858 PE=1 SV=1	52	0	70	0	0.322	0	70	4	110	6	0.311	0.019	34	4	66	7	0.153	0.022	0.0198447	CG8858
CG12202	Nat1 OS=Drosophila melanogaster GN=Nat1 PE=1 SV=1	71	5	115	16	0.574	0.078	54	10	84	15	0.502	0.076	34	4	90	10	0.301	0.031	0.0225368	CG12202
CG3725	Isoform A of Calcium-transporting ATPase sarcoplasmic/endoplasmic reticulum type OS=Drosophila melanogaster GN=Ca-P60A	30	2	39	3	0.318	0.027	69	6	148	6	0.449	0.048	34	3	87	3	0.269	0.029	0.0401215	CG3725
CG12702	CG12702 OS=Drosophila melanogaster GN=CG12702-RA PE=1 SV=1	31	0	37	0	0.378	0	57	5	90	7	0.439	0.052	34	3	87	8	0.284	0.036	0.0200317	CG12702
CG6057	SD02122p OS=Drosophila melanogaster GN=SMC1 PE=2 SV=1	44	0	61	0	0.348	0	53	8	75	10	0.376	0.059	34	2	65	3	0.237	0.015	0.00442531	CG6057
CG13185	CG13185, isoform B OS=Drosophila melanogaster GN=CG13185 PE=1 SV=1	12	0	17	0	0.033	0	81	3	111	3	0.155	0.008	34	0	53	0	0.081	0	0.08952	CG13185
CG31935	Rab3 GTPase-activating protein catalytic subunit OS=Drosophila melanogaster GN=CG31935 PE=1 SV=2	11	0	14	0	0.168	0	55	4	83	6	0.402	0.06	34	0	57	0	0.314	0	0.0632715	CG31935
CG4918	60S acidic ribosomal protein P2 OS=Drosophila melanogaster GN=RpLP2 PE=1 SV=1	15	0	45	0	0.735	0	33	17	130	69	0.77	0.593	33	17	148	165	0.628	0.389	0.0653626	CG4918
CG2979	Vitellogenin-2 OS=Drosophila melanogaster GN=Yp2 PE=1 SV=2	40	8	183	26	0.57	0.183	43	14	80	28	0.459	0.174	33	11	82	36	0.495	0.186	0.00152493	CG2979
CG8877	Pre-mRNA processing factor 8 OS=Drosophila melanogaster GN=Prp8 PE=4 SV=1	88	0	125	0	0.337	0	74	3	116	4	0.284	0.008	33	0	83	0	0.121	0	0.0300052	CG8877
CG2637	Importin subunit beta OS=Drosophila melanogaster GN=Fs(2)Ket PE=1 SV=2	50	4	109	16	0.577	0.064	52	0	142	0	0.355	0	33	0	128	0	0.239	0	0.00751971	CG2637
CG5525	T-complex protein 1 subunit delta OS=Drosophila melanogaster GN=CG5525 PE=1 SV=1	60	5	246	14	0.705	0.148	52	8	153	13	0.597	0.098	32	6	75	24	0.407	0.088	0.0182044	CG5525
CG8711	Cullin-4, isoform A OS=Drosophila melanogaster GN=Cul-4 PE=1 SV=1	47	2	64	7	0.419	0.026	71	8	136	11	0.474	0.078	32	5	76	8	0.242	0.052	0.0275945	CG8711
CG9888	rRNA 2'-O-methyltransferase fibrillarin OS=Drosophila melanogaster GN=Fib PE=1 SV=1	40	4	307	13	0.413	0.157	36	7	196	14	0.573	0.14	32	5	112	27	0.352	0.108	0.00115533	CG9888
CG33101	Vesicle-fusing ATPase 2 OS=Drosophila melanogaster GN=Nsf2 PE=2 SV=2	52	2	85	2	0.585	0.031	65	5	116	6	0.561	0.043	32	3	71	6	0.312	0.043	0.0196639	CG33101
CG5899	CG5899, isoform C OS=Drosophila melanogaster GN=Etl1 PE=4 SV=1	27	0	51	0	0.391	0	59	2	123	2	0.457	0.013	32	3	84	15	0.331	0.049	0.0310107	CG5899
CG31368	CG31368, isoform D OS=Drosophila melanogaster GN=CG31368 PE=1 SV=2	12	0	13	0	0.116	0	61	0	111	0	0.366	0	32	2	71	4	0.191	0.013	0.0684431	CG31368
CG18102	Dynamin OS=Drosophila melanogaster GN=shi PE=1 SV=2	49	0	84	0	0.453	0	67	8	127	9	0.454	0.057	32	0	61	0	0.267	0	0.0182714	CG18102
CG11198	CG11198, isoform D OS=Drosophila melanogaster GN=ACC PE=4 SV=1	10	0	11	0	0.075	0	49	7	75	9	0.205	0.021	32	0	68	0	0.15	0	0.0629737	CG11198
CG1371	CG1371 OS=Drosophila melanogaster GN=CG1371 PE=4 SV=1	13	0	15	0	0.117	0	39	4	71	4	0.317	0.038	32	0	72	0	0.225	0	0.0357057	CG1371
CG8103	Chromodomain-helicase-DNA-binding protein Mi-2 homolog OS=Drosophila melanogaster GN=Mi-2 PE=1 SV=2	28	0	37	0	0.195	0	52	6	74	8	0.263	0.016	31	6	66	16	0.191	0.032	0.0204713	CG8103
CG3401	Tubulin beta-3 chain OS=Drosophila melanogaster GN=betaTub60D PE=1 SV=2	30	5	477	27	0.63	0.13	62	4	171	7	0.524	0.051	31	4	151	37	0.262	0.077	0.0365138	CG3401
CG2684	Transcription termination factor 2 OS=Drosophila melanogaster GN=lds PE=1 SV=2	25	0	36	0	0.268	0	50	4	77	8	0.348	0.031	31	4	80	10	0.265	0.041	0.0227673	CG2684
CG4609	Failed axon connections, isoform A OS=Drosophila melanogaster GN=fax PE=1 SV=1	26	0	182	0	0.519	0	37	3	85	3	0.498	0.072	31	3	55	17	0.452	0.074	0.00353987	CG4609
CG30085	CG30085 OS=Drosophila melanogaster GN=CG30085 PE=1 SV=1	44	0	53	0	0.344	0	53	5	83	10	0.319	0.037	31	2	57	5	0.221	0.028	0.00994772	CG30085
CG2331	Isoform D of Transitional endoplasmic reticulum ATPase TER94 OS=Drosophila melanogaster GN=TER94	43	5	77	10	0.505	0.083	43	4	94	4	0.494	0.039	31	2	67	6	0.285	0.023	0.00492991	CG2331
CG34407	Not1, isoform C OS=Drosophila melanogaster GN=Not1 PE=4 SV=1	40	0	58	0	0.181	0	74	2	106	3	0.24	0.004	31	0	77	0	0.089	0	0.0337489	CG34407
CG10122	DNA-directed RNA polymerase I subunit RPA1 OS=Drosophila melanogaster GN=RpI1 PE=1 SV=2	23	0	25	0	0.172	0	50	0	97	0	0.32	0	31	0	54	0	0.18	0	0.0247126	CG10122
CG7111	Guanine nucleotide-binding protein subunit beta-like protein OS=Drosophila melanogaster GN=Rack1 PE=2 SV=2	38	6	163	21	0.67	0.173	50	9	97	23	0.632	0.179	30	8	132	38	0.412	0.195	0.0148492	CG7111
CG6339	DNA repair protein RAD50 OS=Drosophila melanogaster GN=rad50 PE=2 SV=3	34	0	41	0	0.24	0	52	6	65	6	0.329	0.037	30	4	65	5	0.201	0.027	0.0141526	CG6339
CG31639	26S proteasome regulatory complex subunit p37A OS=Drosophila melanogaster GN=Uch-L3 PE=2 SV=1	37	5	77	10	0.679	0.16	43	2	73	2	0.741	0.074	30	2	100	9	0.515	0.052	0.00429908	CG31639
CG6181	Enhancer of mRNA-decapping protein 4 homolog OS=Drosophila melanogaster GN=Ge-1 PE=1 SV=2	10	0	14	0	0.082	0	36	2	53	2	0.226	0.017	30	2	59	3	0.181	0.011	0.0457769	CG6181
CG17489	60S ribosomal protein L5 OS=Drosophila melanogaster GN=RpL5 PE=1 SV=2	44	10	455	25	0.572	0.241	18	8	34	22	0.425	0.084	29	10	73	84	0.492	0.214	0.0535582	CG17489
CG4863	60S ribosomal protein L3 OS=Drosophila melanogaster GN=RpL3 PE=2 SV=3	54	8	173	143	0.56	0.161	29	9	56	17	0.469	0.12	29	5	77	24	0.38	0.101	0.0332107	CG4863
CG13349	CG13349, isoform D OS=Drosophila melanogaster GN=CG13349 PE=4 SV=1	42	3	212	6	0.809	0.092	64	0	181	0	0.755	0	29	3	76	6	0.505	0.052	0.0254085	CG13349
CG5170	Dodeca-satellite-binding protein 1, isoform A OS=Drosophila melanogaster GN=Dp1 PE=2 SV=1	16	0	21	0	0.151	0	32	3	44	4	0.243	0.027	29	2	62	4	0.18	0.017	0.0179224	CG5170
CG5520	Glycoprotein 93 OS=Drosophila melanogaster GN=Gp93 PE=1 SV=1	29	0	39	0	0.389	0	48	4	77	5	0.375	0.058	29	0	60	0	0.264	0	0.0143086	CG5520
CG5838	DNA replication-related element factor OS=Drosophila melanogaster GN=Dref PE=1 SV=2	60	7	178	12	0.573	0.117	82	14	351	48	0.508	0.106	28	9	258	41	0.26	0.116	0.0471339	CG5838
CG17291	Serine/threonine-protein phosphatase PP2A 65 kDa regulatory subunit OS=Drosophila melanogaster GN=Pp2A-29B PE=1 SV=4	63	4	365	11	0.635	0.078	59	7	198	15	0.523	0.068	28	3	80	16	0.338	0.046	0.0265717	CG17291
CG11901	Elongation factor 1-gamma OS=Drosophila melanogaster GN=Ef1gamma PE=2 SV=2	29	7	73	18	0.501	0.181	32	5	49	6	0.545	0.081	28	2	58	18	0.434	0.042	0.000115136	CG11901
CG8590	EG:BACR25B3.9 protein OS=Drosophila melanogaster GN=Klp3A PE=1 SV=1	36	0	53	0	0.357	0	47	4	73	4	0.337	0.024	28	0	70	0	0.221	0	0.00920554	CG8590
CG5366	CG5366 OS=Drosophila melanogaster GN=CG5366 PE=2 SV=1	29	0	43	0	0.292	0	43	0	65	0	0.335	0	28	0	63	0	0.234	0	0.0102274	CG5366
CG4001	6-phosphofructokinase OS=Drosophila melanogaster GN=Pfk PE=2 SV=2	25	0	40	0	0.315	0	39	0	63	0	0.445	0	28	0	78	0	0.343	0	0.0093595	CG4001
CG5965	Without children, isoform B OS=Drosophila melanogaster GN=woc PE=4 SV=1	14	0	15	0	0.114	0	28	0	39	0	0.186	0	28	0	71	0	0.18	0	0.0188748	CG5965
CG14999	Replication factor C subunit 2 OS=Drosophila melanogaster GN=RfC4 PE=1 SV=1	27	5	110	7	0.668	0.166	52	10	106	12	0.719	0.248	27	8	56	33	0.613	0.199	0.0379392	CG14999
CG9750	RuvB-like helicase 2 OS=Drosophila melanogaster GN=rept PE=1 SV=1	25	5	39	13	0.474	0.116	27	3	43	3	0.387	0.071	27	8	52	23	0.366	0.179	0.000662305	CG9750
CG4183	Heat shock protein 26 OS=Drosophila melanogaster GN=Hsp26 PE=1 SV=2	41	5	439	78	0.611	0.255	43	4	96	5	0.798	0.111	27	6	114	63	0.486	0.159	0.0113283	CG4183
CG5313	Replication factor C subunit 3 OS=Drosophila melanogaster GN=RfC3 PE=1 SV=2	23	8	48	16	0.587	0.187	26	5	47	6	0.524	0.105	27	3	74	10	0.476	0.051	0.00026749	CG5313
CG3180	DNA-directed RNA polymerase II subunit RPB2 OS=Drosophila melanogaster GN=RpII140 PE=2 SV=2	10	0	10	0	0.122	0	47	0	68	0	0.311	0	27	0	49	0	0.207	0	0.0600587	CG3180
CG5353	FI05224p OS=Drosophila melanogaster GN=Aats-thr PE=2 SV=2	25	2	28	4	0.361	0.035	41	0	65	0	0.446	0	27	0	63	0	0.321	0	0.0123881	CG5353
CG17023	DEAD-box helicase Dbp80 OS=Drosophila melanogaster GN=Dbp80 PE=1 SV=1	24	0	35	0	0.37	0	40	2	75	5	0.574	0.035	27	0	66	0	0.313	0	0.0122867	CG17023
CG8309	Eukaryotic translation initiation factor 3 subunit M OS=Drosophila melanogaster GN=Tango7 PE=2 SV=1	29	7	151	14	0.693	0.202	39	4	75	4	0.545	0.067	27	0	72	0	0.434	0	0.00317985	CG8309
CG4303	Brahma associated protein 60kD OS=Drosophila melanogaster GN=Bap60 PE=1 SV=1	23	5	37	6	0.408	0.101	47	3	69	3	0.47	0.058	26	6	66	12	0.28	0.091	0.0333308	CG4303
CG7467	Trithorax group protein osa OS=Drosophila melanogaster GN=osa PE=1 SV=1	17	0	22	0	0.079	0	40	12	54	16	0.108	0.042	26	6	55	20	0.086	0.022	0.0318816	CG7467
CG6141	60S ribosomal protein L9 OS=Drosophila melanogaster GN=RpL9 PE=1 SV=2	19	2	236	8	0.747	0.1	36	3	267	3	0.732	0.137	26	5	88	19	0.584	0.158	0.0186123	CG6141
CG10198	Nup98 OS=Drosophila melanogaster GN=Nup98 PE=1 SV=3	28	0	53	0	0.158	0	67	11	143	21	0.197	0.032	26	4	74	10	0.091	0.018	0.0553937	CG10198
CG10370	26S proteasome regulatory complex subunit p50 OS=Drosophila melanogaster GN=Tbp-1 PE=2 SV=1	37	0	305	0	0.624	0	75	0	177	0	0.759	0	26	3	76	9	0.458	0.063	0.0465463	CG10370
CG7619	26S proteasome non-ATPase regulatory subunit 4 OS=Drosophila melanogaster GN=Pros54 PE=1 SV=2	24	0	62	0	0.715	0	34	4	72	5	0.818	0.076	26	3	72	15	0.23	0.106	0.00353998	CG7619
CG7055	DALAO protein OS=Drosophila melanogaster GN=dalao PE=1 SV=1	31	4	63	9	0.31	0.039	33	11	55	24	0.295	0.083	26	2	58	8	0.219	0.037	0.00134187	CG7055
CG42616	Cullin 3, isoform F OS=Drosophila melanogaster GN=Cul-3 PE=3 SV=2	40	0	66	0	0.429	0	74	5	115	9	0.536	0.064	26	0	50	0	0.221	0	0.0427064	CG42616
CG4579	Nup154 OS=Drosophila melanogaster GN=Nup154 PE=2 SV=1	20	0	28	0	0.195	0	52	2	105	2	0.309	0.014	26	0	74	0	0.155	0	0.0410019	CG4579
CG8322	ATP citrate lyase, isoform D OS=Drosophila melanogaster GN=ATPCL PE=1 SV=1	16	0	23	0	0.175	0	49	2	71	9	0.349	0.013	26	0	56	0	0.211	0	0.0464035	CG8322
CG9020	Probable arginyl-tRNA synthetase, cytoplasmic OS=Drosophila melanogaster GN=Aats-arg PE=2 SV=1	32	2	32	7	0.349	0.036	36	5	57	6	0.355	0.053	26	0	49	0	0.32	0	0.00160263	CG9020
CG4236	Probable histone-binding protein Caf1 OS=Drosophila melanogaster GN=Caf1 PE=1 SV=1	11	0	42	0	0.293	0	26	5	47	8	0.409	0.063	26	0	62	0	0.4	0	0.0245807	CG4236
CG8092	RE01954p OS=Drosophila melanogaster GN=row PE=1 SV=1	21	0	26	0	0.238	0	38	6	71	8	0.269	0.036	25	7	48	11	0.173	0.068	0.0147175	CG8092
CG8882	Eukaryotic translation initiation factor 3 subunit I OS=Drosophila melanogaster GN=Trip1 PE=1 SV=1	27	8	116	12	0.776	0.313	37	9	93	15	0.828	0.227	25	6	70	32	0.469	0.19	0.0112	CG8882
CG9677	Eukaryotic translation initiation factor 3 subunit E OS=Drosophila melanogaster GN=eIF3-S6 PE=2 SV=1	19	3	39	3	0.414	0.062	26	0	36	0	0.372	0	25	6	59	18	0.336	0.115	0.00114274	CG9677
CG1883	40S ribosomal protein S7 OS=Drosophila melanogaster GN=RpS7 PE=2 SV=1	39	4	99	13	0.665	0.18	43	16	143	50	0.727	0.381	25	5	93	40	0.448	0.165	0.00925767	CG1883
CG18408	Chromosome-associated protein, isoform B OS=Drosophila melanogaster GN=Cap PE=2 SV=1	41	0	64	0	0.38	0	48	4	68	9	0.379	0.036	25	3	53	10	0.238	0.026	0.0156456	CG18408
CG5733	Nup75 OS=Drosophila melanogaster GN=Nup75 PE=4 SV=1	20	4	41	9	0.377	0.07	44	3	89	4	0.476	0.025	25	3	55	9	0.265	0.034	0.0344371	CG5733
CG4365	CG4365, isoform A OS=Drosophila melanogaster GN=CG4365 PE=2 SV=2	16	0	32	0	0.554	0	28	3	45	3	0.603	0.095	25	3	55	4	0.531	0.115	0.0108965	CG4365
CG31739	CG31739 OS=Drosophila melanogaster GN=mdy PE=1 SV=3	25	0	36	0	0.279	0	59	6	92	8	0.446	0.037	25	2	58	6	0.217	0.018	0.04687	CG31739
CG1528	Isoform C of Coatomer subunit gamma OS=Drosophila melanogaster GN=gammaCop	36	2	113	6	0.457	0.032	56	2	149	2	0.467	0.021	25	2	65	4	0.211	0.021	0.027604	CG1528
CG33122	Cutlet OS=Drosophila melanogaster GN=cutlet PE=2 SV=2	22	0	24	0	0.276	0	45	0	68	0	0.383	0	25	2	45	2	0.24	0.031	0.026098	CG33122
CG1691	IGF-II mRNA-binding protein, isoform D OS=Drosophila melanogaster GN=Imp PE=2 SV=1	30	0	109	0	0.41	0	44	4	85	5	0.5	0.06	25	2	69	6	0.311	0.026	0.0139958	CG1691
CG12113	GH13214p OS=Drosophila melanogaster GN=l(1)G0095 PE=1 SV=1	29	0	43	0	0.308	0	55	0	94	0	0.414	0	25	0	63	0	0.203	0	0.0304689	CG12113
CG1945	Probable ubiquitin carboxyl-terminal hydrolase FAF OS=Drosophila melanogaster GN=faf PE=1 SV=2	15	0	18	0	0.095	0	52	0	71	0	0.178	0	25	0	54	0	0.091	0	0.0545095	CG1945
CG1512	Cul-2, isoform A OS=Drosophila melanogaster GN=Cul-2 PE=2 SV=3	20	0	25	0	0.235	0	35	3	52	3	0.368	0.033	25	0	52	0	0.263	0	0.0118286	CG1512
CG5378	26S proteasome non-ATPase regulatory subunit 6 OS=Drosophila melanogaster GN=Rpn7 PE=1 SV=1	33	4	58	11	0.584	0.111	37	9	61	11	0.504	0.123	24	4	77	15	0.342	0.077	0.00574148	CG5378
CG13900	CG13900, isoform A OS=Drosophila melanogaster GN=CG13900-RA PE=2 SV=2	10	0	15	0	0.112	0	36	8	52	16	0.294	0.054	24	4	42	14	0.192	0.035	0.0566254	CG13900
CG13391	Alanyl-tRNA synthetase, cytoplasmic OS=Drosophila melanogaster GN=Aats-ala PE=2 SV=1	26	0	30	0	0.341	0	41	10	64	17	0.406	0.059	24	2	52	2	0.259	0.027	0.0105478	CG13391
CG5119	Polyadenylate-binding protein OS=Drosophila melanogaster GN=pAbp PE=1 SV=3	53	9	181	21	0.584	0.211	41	2	60	3	0.511	0.019	24	2	57	2	0.311	0.035	0.0223705	CG5119
CG6370	CG6370 OS=Drosophila melanogaster GN=CG6370 PE=1 SV=1	16	0	18	0	0.278	0	37	2	55	2	0.424	0.014	24	2	55	5	0.183	0.033	0.0281156	CG6370
CG9484	E3 ubiquitin-protein ligase hyd OS=Drosophila melanogaster GN=hyd PE=1 SV=3	17	0	21	0	0.101	0	65	6	96	7	0.242	0.02	24	0	51	0	0.096	0	0.076819	CG9484
CG3821	Aspartyl-tRNA synthetase OS=Drosophila melanogaster GN=Aats-asp PE=1 SV=1	24	0	74	0	0.401	0	31	0	49	0	0.51	0	24	0	54	0	0.386	0	0.00388002	CG3821
CG4634	Inorganic pyrophosphatase OS=Drosophila melanogaster GN=Nurf-38 PE=1 SV=3	27	5	91	7	0.669	0.189	34	3	58	3	0.657	0.083	23	3	66	7	0.467	0.083	0.00702294	CG4634
CG40411	Poly [ADP-ribose] polymerase OS=Drosophila melanogaster GN=Parp PE=2 SV=1	52	0	76	0	0.405	0	41	0	58	0	0.365	0	23	2	45	3	0.262	0.019	0.0226514	CG40411
CG6174	Actin-like protein 87C OS=Drosophila melanogaster GN=Arp87C PE=1 SV=2	29	5	67	9	0.505	0.112	40	3	121	5	0.529	0.051	23	2	100	10	0.332	0.051	0.0142297	CG6174
CG4033	DNA-directed RNA polymerase I subunit RPA2 OS=Drosophila melanogaster GN=RpI135 PE=2 SV=2	27	0	32	0	0.278	0	59	3	93	5	0.468	0.019	23	0	71	0	0.178	0	0.0445026	CG4033
CG9999	Ran GTPase-activating protein OS=Drosophila melanogaster GN=RanGap PE=1 SV=1	29	0	48	0	0.495	0	40	4	68	8	0.502	0.044	23	0	57	0	0.247	0	0.0107946	CG9999
CG7671	CG7671 OS=Drosophila melanogaster GN=Nup43 PE=1 SV=1	15	0	22	0	0.416	0	32	0	45	0	0.494	0	23	0	58	0	0.358	0	0.0207727	CG7671
CG5064	Signal recognition particle 68 kDa protein OS=Drosophila melanogaster GN=Srp68 PE=1 SV=1	30	5	44	10	0.477	0.079	25	6	36	6	0.366	0.071	22	6	50	10	0.305	0.086	0.00602195	CG5064
CG5434	Srp72 OS=Drosophila melanogaster GN=Srp72 PE=1 SV=1	43	4	60	5	0.578	0.069	40	4	67	5	0.523	0.055	22	5	39	14	0.346	0.069	0.021245	CG5434
CG13849	FI04781p OS=Drosophila melanogaster GN=Nop56 PE=2 SV=1	39	6	117	12	0.538	0.169	33	8	87	12	0.429	0.097	22	5	47	32	0.331	0.062	0.0170191	CG13849
CG2985	Vitellogenin-1 OS=Drosophila melanogaster GN=Yp1 PE=1 SV=1	41	5	128	27	0.576	0.203	45	9	90	13	0.567	0.123	22	4	56	38	0.36	0.057	0.0230884	CG2985
CG8947	26-29kD-proteinase OS=Drosophila melanogaster GN=26-29-p PE=2 SV=1	26	2	57	3	0.457	0.042	33	6	57	10	0.326	0.055	22	4	66	15	0.228	0.051	0.00575101	CG8947
CG9946	Eukaryotic translation initiation factor 2 subunit 1 OS=Drosophila melanogaster GN=eIF-2alpha PE=1 SV=1	24	0	36	0	0.522	0	32	8	63	24	0.522	0.188	22	4	46	34	0.34	0.085	0.0028256	CG9946
CG4157	26S proteasome regulatory complex subunit p30 OS=Drosophila melanogaster GN=Rpn12 PE=1 SV=1	13	2	67	5	0.42	0.08	17	5	28	9	0.489	0.11	22	4	51	11	0.413	0.11	0.0123881	CG4157
CG8815	LD13852p OS=Drosophila melanogaster GN=Sin3A PE=1 SV=1	37	0	52	0	0.23	0	40	11	62	16	0.229	0.04	22	3	57	5	0.126	0.022	0.00935205	CG8815
CG18176	Deflated OS=Drosophila melanogaster GN=defl PE=2 SV=1	10	0	14	0	0.118	0	46	2	62	2	0.369	0.008	22	2	52	3	0.169	0.024	0.0722646	CG18176
CG8893	Glyceraldehyde-3-phosphate dehydrogenase 2 OS=Drosophila melanogaster GN=Gapdh2 PE=1 SV=2	24	3	142	6	0.732	0.136	44	5	96	7	0.633	0.105	22	2	226	6	0.355	0.081	0.0303895	CG8893
CG14472	Protein purity of essence OS=Drosophila melanogaster GN=poe PE=1 SV=1	8	0	12	0	0.027	0	54	0	88	0	0.115	0	22	0	43	0	0.053	0	0.0879976	CG14472
CG2982	Lysine-specific demethylase NO66 OS=Drosophila melanogaster GN=CG2982 PE=1 SV=1	24	4	37	22	0.351	0.075	47	0	96	0	0.493	0	22	0	52	0	0.329	0	0.0311509	CG2982
CG12055	Glyceraldehyde-3-phosphate dehydrogenase 1 OS=Drosophila melanogaster GN=Gapdh1 PE=2 SV=2	23	3	91	6	0.687	0.136	40	5	85	5	0.551	0.102	22	0	212	0	0.367	0	0.0206204	CG12055
CG6582	Apoptosis inhibitor 5 homolog OS=Drosophila melanogaster GN=Aac11 PE=1 SV=1	33	0	82	0	0.552	0	36	0	59	0	0.487	0	22	0	56	0	0.269	0	0.00956044	CG6582
CG7436	Glycylpeptide N-tetradecanoyltransferase OS=Drosophila melanogaster GN=Nmt PE=2 SV=2	29	3	49	6	0.453	0.087	35	0	57	0	0.597	0	22	0	48	0	0.392	0	0.00664563	CG7436
CG10944	40S ribosomal protein S6 OS=Drosophila melanogaster GN=RpS6 PE=1 SV=1	34	8	133	53	0.44	0.274	30	3	49	8	0.444	0.121	22	0	61	0	0.347	0	0.00317463	CG10944
CG7583	C-terminal-binding protein OS=Drosophila melanogaster GN=CtBP PE=1 SV=3	21	12	85	31	0.324	0.16	30	3	62	6	0.51	0.049	22	0	63	0	0.394	0	0.00759368	CG7583
CG7434	60S ribosomal protein L22 OS=Drosophila melanogaster GN=RpL22 PE=1 SV=2	26	7	252	64	0.515	0.217	26	4	65	18	0.411	0.13	21	9	99	54	0.361	0.12	0.000718254	CG7434
CG8857	Ribosomal protein S11, isoform C OS=Drosophila melanogaster GN=RpS11 PE=3 SV=1	23	7	73	18	0.394	0.31	19	5	36	6	0.471	0.181	21	7	75	28	0.465	0.245	0.000597076	CG8857
CG12244	Licorne OS=Drosophila melanogaster GN=lic PE=1 SV=1	23	2	41	4	0.587	0.081	33	7	74	16	0.656	0.135	21	6	50	53	0.422	0.147	0.009495	CG12244
CG14813	Delta-coatomer protein, isoform A OS=Drosophila melanogaster GN=deltaCOP PE=1 SV=1	13	0	16	0	0.263	0	32	8	77	10	0.455	0.126	21	6	59	15	0.267	0.1	0.0353508	CG14813
CG8900	40S ribosomal protein S18 OS=Drosophila melanogaster GN=RpS18 PE=1 SV=1	17	6	42	21	0.52	0.388	22	4	40	10	0.592	0.112	21	5	52	23	0.553	0.164	0.00250797	CG8900
CG6546	Brahma associated protein 55kD OS=Drosophila melanogaster GN=Bap55 PE=2 SV=1	30	2	58	6	0.642	0.047	52	7	144	8	0.652	0.134	21	4	68	11	0.416	0.104	0.0396277	CG6546
CG10223	DNA topoisomerase 2 OS=Drosophila melanogaster GN=Top2 PE=1 SV=1	48	4	81	6	0.326	0.037	33	4	46	8	0.207	0.026	21	3	36	4	0.135	0.026	0.0300525	CG10223
CG7257	AT06668p OS=Drosophila melanogaster GN=Rpt4R PE=1 SV=1	13	0	32	0	0.151	0	14	0	33	0	0.151	0	21	3	74	6	0.151	0.043	0.00824708	CG7257
CG9854	FI03258p OS=Drosophila melanogaster GN=hrg PE=1 SV=1	30	0	56	0	0.44	0	44	0	76	0	0.498	0	21	2	80	5	0.264	0.018	0.021182	CG9854
CG11092	CG11092 OS=Drosophila melanogaster GN=CG11092 PE=1 SV=1	21	0	24	0	0.323	0	24	0	39	0	0.261	0	21	2	44	7	0.207	0.023	7.65448e-05	CG11092
CG1554	DNA-directed RNA polymerase II subunit RPB1 OS=Drosophila melanogaster GN=RpII215 PE=1 SV=4	24	0	25	0	0.163	0	48	0	84	0	0.253	0	21	0	47	0	0.121	0	0.0341374	CG1554
CG2943	CG2943 OS=Drosophila melanogaster GN=CG2943 PE=2 SV=1	22	0	23	0	0.217	0	40	5	55	8	0.389	0.046	21	0	42	0	0.201	0	0.0219862	CG2943
CG17665	Integrator complex subunit 3 homolog OS=Drosophila melanogaster GN=CG17665 PE=1 SV=1	16	0	22	0	0.192	0	38	0	52	0	0.225	0	21	0	42	0	0.162	0	0.03209	CG17665
CG12352	Probable N-acetyltransferase san OS=Drosophila melanogaster GN=san PE=1 SV=1	14	0	22	0	0.511	0	26	0	51	0	0.739	0	21	0	66	0	0.446	0	0.0140329	CG12352
CG8732	Lethal (2) 44DEa, isoform A OS=Drosophila melanogaster GN=Acsl PE=2 SV=1	10	0	13	0	0.183	0	19	3	34	4	0.303	0.035	21	0	45	0	0.309	0	0.0174369	CG8732
CG11129	Vitellogenin-3 OS=Drosophila melanogaster GN=Yp3 PE=1 SV=1	36	13	238	82	0.502	0.305	38	10	66	22	0.517	0.121	20	12	51	40	0.398	0.226	0.035675	CG11129
CG3274	Brahma associated protein 170kD OS=Drosophila melanogaster GN=Bap170 PE=4 SV=1	27	2	38	7	0.194	0.023	65	13	122	26	0.334	0.043	20	6	37	11	0.098	0.034	0.0782443	CG3274
CG10712	Chromator, isoform A OS=Drosophila melanogaster GN=Chro PE=1 SV=1	32	0	60	0	0.359	0	38	10	63	16	0.326	0.078	20	6	45	21	0.202	0.08	0.0123934	CG10712
CG9206	Dynactin subunit 1 OS=Drosophila melanogaster GN=Gl PE=1 SV=2	18	0	39	0	0.191	0	38	3	55	6	0.342	0.028	20	6	35	10	0.191	0.036	0.0317678	CG9206
CG1524;	40S ribosomal protein S14 OS=Drosophila melanogaster GN=RpS14a PE=1 SV=1	30	7	118	59	0.689	0.364	30	8	75	22	0.503	0.364	20	4	97	44	0.437	0.172	0.00839453	CG1524;
CG5642	Eukaryotic translation initiation factor 3 subunit L OS=Drosophila melanogaster GN=CG5642 PE=1 SV=1	24	5	42	11	0.414	0.106	41	3	68	7	0.434	0.048	20	3	53	14	0.237	0.048	0.0302031	CG5642
CG3193	Protein crooked neck OS=Drosophila melanogaster GN=crn PE=1 SV=2	21	0	28	0	0.283	0	38	4	55	4	0.343	0.044	20	3	42	16	0.252	0.033	0.0246557	CG3193
CG10077	CG10077, isoform A OS=Drosophila melanogaster GN=CG10077 PE=1 SV=1	19	2	31	5	0.271	0.029	38	4	92	14	0.328	0.039	20	3	96	9	0.192	0.029	0.0328067	CG10077
CG33303	CG33303 OS=Drosophila melanogaster GN=CG33303 PE=1 SV=1	17	0	20	0	0.31	0	23	2	39	2	0.332	0.048	20	3	59	15	0.225	0.055	0.00131235	CG33303
CG4849	CG4849 OS=Drosophila melanogaster GN=CG4849 PE=2 SV=1	18	0	19	0	0.294	0	31	6	49	10	0.332	0.055	20	2	49	16	0.202	0.022	0.0117098	CG4849
CG9423	Karyopherin alpha 3 OS=Drosophila melanogaster GN=Kap-alpha3 PE=2 SV=1	39	6	285	15	0.518	0.109	31	4	60	7	0.475	0.039	20	2	57	2	0.214	0.035	0.0186157	CG9423
CG10230	26S proteasome regulatory complex subunit p39A OS=Drosophila melanogaster GN=Rpn9 PE=1 SV=1	40	4	110	11	0.696	0.123	31	0	56	0	0.414	0	20	2	153	15	0.374	0.026	0.0174621	CG10230
CG1059	FI07923p OS=Drosophila melanogaster GN=Karybeta3 PE=2 SV=1	14	0	16	0	0.177	0	39	2	53	2	0.336	0.02	20	0	38	0	0.17	0	0.0435186	CG1059
CG3068	Aurora OS=Drosophila melanogaster GN=aur PE=2 SV=1	13	0	14	0	0.273	0	31	0	45	0	0.472	0	20	0	60	0	0.27	0	0.0276721	CG3068
CG4747	Putative oxidoreductase GLYR1 homolog OS=Drosophila melanogaster GN=CG4747 PE=1 SV=1	24	11	36	23	0.407	0.193	28	0	37	0	0.463	0	20	0	42	0	0.277	0	0.00702054	CG4747
CG3395	40S ribosomal protein S9 OS=Drosophila melanogaster GN=RpS9 PE=1 SV=2	22	8	112	88	0.41	0.277	22	10	41	18	0.513	0.169	19	9	69	94	0.426	0.241	0.000713293	CG3395
CG6061	Protein lin-54 homolog OS=Drosophila melanogaster GN=mip120 PE=1 SV=1	12	0	24	0	0.178	0	22	2	29	2	0.265	0.031	19	7	34	13	0.222	0.103	0.00959822	CG6061
CG5393	Apontic OS=Drosophila melanogaster GN=apt PE=2 SV=1	13	0	18	0	0.267	0	20	6	26	6	0.329	0.077	19	7	52	21	0.275	0.153	0.00681781	CG5393
CG11276	40S ribosomal protein S4 OS=Drosophila melanogaster GN=RpS4 PE=2 SV=2	23	7	170	160	0.521	0.218	46	5	84	10	0.693	0.123	19	5	44	18	0.437	0.149	0.0528192	CG11276
CG18811	Caprin homolog OS=Drosophila melanogaster GN=CG18811 PE=1 SV=1	28	2	46	2	0.373	0.023	20	4	30	6	0.185	0.036	19	4	64	7	0.144	0.029	0.00875974	CG18811
CG8636	Eukaryotic translation initiation factor 3 subunit G-1 OS=Drosophila melanogaster GN=eIF3-S4-1 PE=1 SV=1	18	5	52	15	0.558	0.253	19	0	36	0	0.416	0	19	4	62	11	0.413	0.145	0.00359369	CG8636
CG5371	Ribonucleoside-diphosphate reductase large subunit OS=Drosophila melanogaster GN=RnrL PE=1 SV=2	44	0	70	0	0.534	0	47	0	70	0	0.355	0	19	2	46	4	0.196	0.02	0.027498	CG5371
CG11788	CG11788 OS=Drosophila melanogaster GN=CG11788 PE=1 SV=1	18	0	25	0	0.435	0	29	2	46	4	0.551	0.045	19	2	33	3	0.344	0.038	0.0121741	CG11788
CG3173	CG3173 OS=Drosophila melanogaster GN=CG3173 PE=1 SV=2	23	0	32	0	0.173	0	50	3	70	3	0.215	0.012	19	0	31	0	0.084	0	0.0457027	CG3173
CG12132	C11.1 OS=Drosophila melanogaster GN=c11.1 PE=1 SV=2	4	0	4	0	0.041	0	34	0	41	0	0.165	0	19	0	30	0	0.118	0	0.0797447	CG12132
CG12306	Serine/threonine-protein kinase polo OS=Drosophila melanogaster GN=polo PE=1 SV=2	34	0	55	0	0.517	0	26	4	38	7	0.352	0.054	19	0	36	0	0.273	0	0.0105551	CG12306
CG1877	Cullin homolog 1 OS=Drosophila melanogaster GN=lin19 PE=1 SV=2	18	0	19	0	0.235	0	22	0	29	0	0.236	0	19	0	40	0	0.226	0	0.00185688	CG1877
CG9543	BcDNA.LD29885 OS=Drosophila melanogaster GN=epsilonCOP PE=1 SV=1	21	3	38	6	0.516	0.072	18	12	37	35	0.395	0.183	18	9	49	63	0.297	0.186	0.0199358	CG9543
CG5363	Cyclin-dependent kinase 1 OS=Drosophila melanogaster GN=cdc2 PE=1 SV=1	25	4	47	8	0.677	0.168	26	3	41	3	0.569	0.064	18	5	47	27	0.367	0.141	0.00678085	CG5363
CG9193	Proliferating cell nuclear antigen OS=Drosophila melanogaster GN=mus209 PE=1 SV=2	16	0	38	0	0.569	0	20	3	26	8	0.588	0.081	18	4	33	10	0.373	0.138	0.000359629	CG9193
CG3612	ATP synthase subunit alpha, mitochondrial OS=Drosophila melanogaster GN=blw PE=1 SV=2	19	3	32	3	0.359	0.069	32	4	58	7	0.446	0.054	18	3	34	15	0.272	0.058	0.0240287	CG3612
CG7413	Retinoblastoma family protein OS=Drosophila melanogaster GN=Rbf PE=1 SV=2	12	0	17	0	0.147	0	22	3	40	9	0.283	0.053	18	3	34	5	0.169	0.025	0.012135	CG7413
CG17514	CG17514, isoform A OS=Drosophila melanogaster GN=CG17514 PE=1 SV=2	37	0	49	0	0.183	0	38	2	54	2	0.144	0.007	18	2	31	2	0.065	0.007	0.0217979	CG17514
CG5650	Serine/threonine-protein phosphatase alpha-2 isoform OS=Drosophila melanogaster GN=Pp1-87B PE=1 SV=1	19	3	45	5	0.543	0.119	37	2	83	2	0.692	0.06	18	2	78	11	0.377	0.063	0.0341112	CG5650
CG4453	LD46479p OS=Drosophila melanogaster GN=Nup153 PE=1 SV=4	26	0	35	0	0.232	0	37	4	65	5	0.27	0.018	18	0	37	0	0.111	0	0.0184139	CG4453
CG4320	Raptor OS=Drosophila melanogaster GN=raptor PE=2 SV=1	18	0	22	0	0.167	0	36	3	53	3	0.255	0.011	18	0	26	0	0.121	0	0.0291006	CG4320
CG9684	CG9684 OS=Drosophila melanogaster GN=CG9684 PE=1 SV=2	26	0	31	0	0.414	0	35	2	64	2	0.489	0.019	18	0	31	0	0.274	0	0.016355	CG9684
CG17509	Pds5 OS=Drosophila melanogaster GN=pds5 PE=2 SV=1	21	0	30	0	0.19	0	34	2	53	2	0.265	0.018	18	0	37	0	0.161	0	0.019161	CG17509
CG11943	CG11943, isoform A OS=Drosophila melanogaster GN=CG11943 PE=2 SV=2	17	0	23	0	0.127	0	34	0	47	0	0.157	0	18	0	31	0	0.082	0	0.0264187	CG11943
CG6593	Serine/threonine-protein phosphatase alpha-1 isoform OS=Drosophila melanogaster GN=Pp1alpha-96A PE=1 SV=1	16	2	42	3	0.416	0.083	33	0	75	0	0.621	0	18	0	76	0	0.349	0	0.0270833	CG6593
CG1618	Vesicle-fusing ATPase 1 OS=Drosophila melanogaster GN=comt PE=1 SV=1	22	0	30	0	0.228	0	32	3	40	4	0.272	0.026	18	0	44	0	0.195	0	0.0129435	CG1618
CG6932	COP9 signalosome complex subunit 6 OS=Drosophila melanogaster GN=CSN6 PE=1 SV=1	18	0	28	0	0.393	0	16	2	25	3	0.457	0.047	18	0	38	0	0.328	0	3.00755e-05	CG6932
CG17259	CG17259 OS=Drosophila melanogaster GN=CG17259 PE=1 SV=1	15	0	17	0	0.269	0	16	2	23	2	0.391	0.046	18	0	30	0	0.361	0	0.000112295	CG17259
CG1737	CG1737 OS=Drosophila melanogaster GN=CG1737 PE=2 SV=1	26	2	46	6	0.293	0.033	33	11	62	18	0.367	0.078	17	13	31	24	0.224	0.116	0.0244054	CG1737
CG8937	AT07372p OS=Drosophila melanogaster GN=Hsc70-1 PE=2 SV=1	18	4	41	6	0.121	0.056	13	0	47	0	0.122	0	17	9	47	65	0.134	0.086	0.0134004	CG8937
CG9475	RE01104p OS=Drosophila melanogaster GN=Rpt3R PE=2 SV=2	16	0	52	0	0.351	0	15	4	27	5	0.247	0.042	17	6	52	20	0.188	0.084	0.00614576	CG9475
CG6846	RE17611p OS=Drosophila melanogaster GN=RpL26 PE=2 SV=1	15	9	87	26	0.503	0.416	25	8	47	24	0.591	0.228	17	5	34	40	0.557	0.268	0.0237593	CG6846
CG9124	Eukaryotic translation initiation factor 3 subunit H OS=Drosophila melanogaster GN=eIF-3p40 PE=1 SV=2	20	7	51	16	0.503	0.201	38	6	58	11	0.577	0.124	17	4	62	23	0.405	0.104	0.0479065	CG9124
CG8722	Nup44A, isoform A OS=Drosophila melanogaster GN=Nup44A PE=1 SV=1	7	0	10	0	0.229	0	33	2	56	2	0.508	0.068	17	3	30	11	0.271	0.068	0.0737479	CG8722
CG10565	CG10565 OS=Drosophila melanogaster GN=CG10565 PE=1 SV=1	29	0	37	0	0.418	0	23	6	33	10	0.32	0.084	17	3	39	17	0.28	0.037	0.00739431	CG10565
CG10726	Condensin complex subunit 2 OS=Drosophila melanogaster GN=barr PE=2 SV=1	18	0	28	0	0.303	0	19	0	26	0	0.267	0	17	2	40	4	0.2	0.034	2.30253e-05	CG10726
CG32575	Zinc finger protein hangover OS=Drosophila melanogaster GN=hang PE=1 SV=3	9	0	10	0	0.105	0	18	2	20	2	0.116	0.012	17	2	25	5	0.105	0.012	0.0184151	CG32575
CG3585	CG3585 OS=Drosophila melanogaster GN=Rbcn-3A PE=2 SV=2	2	0	2	0	0.01	0	42	0	51	0	0.135	0	17	0	33	0	0.059	0	0.111741	CG3585
CG2028	Ubiquitin carboxyl-terminal hydrolase 36 OS=Drosophila melanogaster GN=scny PE=1 SV=2	22	0	32	0	0.227	0	41	2	79	3	0.401	0.033	17	0	40	0	0.13	0	0.0348003	CG2028
CG7660	Chorion peroxidase OS=Drosophila melanogaster GN=Pxt PE=2 SV=3	27	0	37	0	0.417	0	33	0	46	0	0.429	0	17	0	46	0	0.235	0	0.015752	CG7660
CG9325	Isoform B of Protein hu-li tai shao OS=Drosophila melanogaster GN=hts	23	0	29	0	0.428	0	31	0	60	0	0.379	0	17	0	33	0	0.221	0	0.0140632	CG9325
CG3157	Tubulin gamma-1 chain OS=Drosophila melanogaster GN=gammaTub23C PE=1 SV=2	24	0	50	0	0.514	0	30	0	67	0	0.531	0	17	0	40	0	0.181	0	0.0121398	CG3157
CG13281	Exportin-2 OS=Drosophila melanogaster GN=Cas PE=1 SV=2	24	2	37	3	0.335	0.027	28	0	50	0	0.292	0	17	0	32	0	0.156	0	0.00841126	CG13281
CG17078	CG17078 OS=Drosophila melanogaster GN=CG17078-RA PE=1 SV=2	12	0	15	0	0.231	0	26	0	34	0	0.379	0	17	0	39	0	0.346	0	0.0232329	CG17078
CG1972	CG1972 OS=Drosophila melanogaster GN=CG1972 PE=2 SV=1	7	0	10	0	0.144	0	25	2	32	3	0.293	0.02	17	0	47	0	0.223	0	0.0463303	CG1972
CG1548	CathD OS=Drosophila melanogaster GN=cathD PE=2 SV=1	17	0	26	0	0.528	0	24	2	49	2	0.505	0.028	17	0	34	0	0.403	0	0.00529055	CG1548
CG33546	GST-containing FLYWCH zinc-finger protein OS=Drosophila melanogaster GN=gfzf PE=1 SV=1	20	0	28	0	0.196	0	19	0	23	0	0.187	0	17	0	34	0	0.156	0	0.00111235	CG33546
CG6297	Chromosomal serine/threonine-protein kinase JIL-1 OS=Drosophila melanogaster GN=JIL-1 PE=1 SV=1	18	0	23	0	0.199	0	17	4	28	6	0.175	0.033	17	0	31	0	0.186	0	0.002345	CG6297
CG7927	BcDNA.GH11023 OS=Drosophila melanogaster GN=BcDNA.GH11023 PE=1 SV=1	7	0	11	0	0.148	0	17	3	24	6	0.287	0.057	17	0	39	0	0.202	0	0.0263777	CG7927
CG3329	Proteasome subunit beta type OS=Drosophila melanogaster GN=Prosbeta2 PE=2 SV=1	15	0	30	0	0.39	0	16	3	34	5	0.474	0.062	17	0	28	0	0.445	0	0.000354004	CG3329
CG12000	Proteasome subunit beta type-4 OS=Drosophila melanogaster GN=Prosbeta7 PE=1 SV=1	14	0	15	0	0.392	0	12	2	14	2	0.396	0.101	17	0	47	0	0.459	0	0.00215868	CG12000
CG18743	Major heat shock 70 kDa protein Ab OS=Drosophila melanogaster GN=Hsp70Ab PE=1 SV=3	15	5	30	12	0.19	0.042	18	5	62	10	0.304	0.045	16	10	45	75	0.179	0.062	0.00696379	CG18743
CG31366	Major heat shock 70 kDa protein Aa OS=Drosophila melanogaster GN=Hsp70Aa PE=2 SV=2	15	5	30	12	0.19	0.042	18	5	62	10	0.304	0.045	16	10	45	75	0.179	0.062	0.00696379	CG31366
CG31359	Major heat shock 70 kDa protein Bb OS=Drosophila melanogaster GN=Hsp70Bb PE=2 SV=2	13	5	28	12	0.172	0.042	17	5	60	10	0.303	0.045	16	10	45	75	0.179	0.062	0.00823908	CG31359
CG31449	Major heat shock 70 kDa protein Ba OS=Drosophila melanogaster GN=Hsp70Ba PE=2 SV=2	13	5	28	12	0.172	0.042	17	5	60	10	0.303	0.045	16	10	45	75	0.179	0.062	0.00823908	CG31449
CG5834	Major heat shock 70 kDa protein Bbb OS=Drosophila melanogaster GN=Hsp70Bbb PE=2 SV=2	13	5	28	12	0.172	0.042	17	5	60	10	0.303	0.045	16	10	45	75	0.179	0.062	0.00823908	CG5834
CG6489	Major heat shock 70 kDa protein Bc OS=Drosophila melanogaster GN=Hsp70Bc PE=2 SV=2	13	5	28	12	0.172	0.042	17	5	60	10	0.303	0.045	16	10	45	75	0.179	0.062	0.00823908	CG6489
CG5502	60S ribosomal protein L4 OS=Drosophila melanogaster GN=RpL4 PE=2 SV=2	47	16	194	428	0.539	0.347	35	11	56	29	0.566	0.115	16	8	37	22	0.249	0.17	0.0690039	CG5502
CG4046	40S ribosomal protein S16 OS=Drosophila melanogaster GN=RpS16 PE=2 SV=1	11	5	79	30	0.453	0.304	25	9	50	35	0.743	0.284	16	7	48	46	0.574	0.27	0.0593494	CG4046
CG9327	Proteasome subunit alpha type-4 OS=Drosophila melanogaster GN=Pros29 PE=1 SV=2	17	3	35	7	0.568	0.087	14	4	23	8	0.557	0.072	16	6	40	21	0.455	0.14	0.000406618	CG9327
CG7230	LD16058p OS=Drosophila melanogaster GN=rib PE=1 SV=1	17	0	27	0	0.247	0	30	3	57	3	0.359	0.035	16	5	36	6	0.234	0.079	0.0223352	CG7230
CG3605	CG3605 OS=Drosophila melanogaster GN=CG3605 PE=1 SV=2	15	0	27	0	0.248	0	21	0	37	0	0.276	0	16	4	34	13	0.152	0.053	0.00155988	CG3605
CG12052	Isoform D of Longitudinals lacking protein, isoforms A/B/D/L OS=Drosophila melanogaster GN=lola	25	0	81	0	0.348	0	25	6	40	7	0.248	0.061	16	3	34	7	0.123	0.048	0.00502271	CG12052
CG8409	Heterochromatin protein 1 OS=Drosophila melanogaster GN=Su(var)205 PE=1 SV=2	14	0	26	0	0.515	0	17	4	33	8	0.573	0.17	16	3	30	13	0.461	0.17	0.000636789	CG8409
CG3125	CG3125, isoform A OS=Drosophila melanogaster GN=l(1)G0060 PE=2 SV=2	26	0	33	0	0.223	0	51	0	93	0	0.274	0	16	2	33	4	0.108	0.014	0.0498662	CG3125
CG7061	Rab3 GTPase-activating protein regulatory subunit OS=Drosophila melanogaster GN=rab3-GAP PE=1 SV=2	10	0	11	0	0.151	0	43	6	73	7	0.26	0.038	16	2	31	3	0.115	0.013	0.0898991	CG7061
CG1404	GTP-binding nuclear protein Ran OS=Drosophila melanogaster GN=ran PE=1 SV=1	20	4	159	13	0.556	0.208	32	0	66	0	0.611	0	16	2	28	24	0.329	0.097	0.0217743	CG1404
CG8340	GTP-binding protein 128up OS=Drosophila melanogaster GN=128up PE=1 SV=2	18	0	24	0	0.514	0	20	4	41	4	0.508	0.087	16	2	27	2	0.277	0.041	0.000304092	CG8340
CG2241	Rpt6R OS=Drosophila melanogaster GN=Rpt6R PE=1 SV=1	10	2	46	6	0.19	0.065	14	3	49	6	0.251	0.09	16	2	78	5	0.266	0.04	0.0108208	CG2241
CG5092	Target of rapamycin OS=Drosophila melanogaster GN=Tor PE=1 SV=1	21	0	26	0	0.126	0	45	2	65	2	0.172	0.008	16	0	23	0	0.077	0	0.0478995	CG5092
CG6197	CG6197 OS=Drosophila melanogaster GN=CG6197 PE=1 SV=1	6	0	6	0	0.069	0	37	4	51	7	0.304	0.031	16	0	43	0	0.159	0	0.0900999	CG6197
CG31137	AT23187p OS=Drosophila melanogaster GN=twin PE=2 SV=2	18	0	25	0	0.417	0	34	0	61	0	0.466	0	16	0	32	0	0.161	0	0.0288671	CG31137
CG7182	CG7182 OS=Drosophila melanogaster GN=CG7182 PE=1 SV=2	26	0	56	0	0.558	0	33	0	126	0	0.491	0	16	0	51	0	0.285	0	0.0183989	CG7182
CG11154	ATP synthase subunit beta, mitochondrial OS=Drosophila melanogaster GN=ATPsyn-beta PE=1 SV=3	25	0	37	0	0.648	0	31	2	52	2	0.578	0.048	16	0	49	0	0.248	0	0.0153618	CG11154
CG12891	LD31742p OS=Drosophila melanogaster GN=whd PE=1 SV=1	15	0	25	0	0.228	0	29	0	48	0	0.397	0	16	0	36	0	0.141	0	0.0236295	CG12891
CG5222	CG5222 OS=Drosophila melanogaster GN=CG5222 PE=1 SV=1	7	0	10	0	0.168	0	29	0	47	0	0.375	0	16	0	33	0	0.162	0	0.0565748	CG5222
CG9591	AT14917p OS=Drosophila melanogaster GN=omd PE=2 SV=2	6	0	8	0	0.088	0	27	0	51	0	0.23	0	16	0	41	0	0.113	0	0.0573173	CG9591
CG3506	ATP-dependent RNA helicase vasa, isoform A OS=Drosophila melanogaster GN=vas PE=1 SV=3	6	0	8	0	0.109	0	20	2	29	2	0.265	0.014	16	0	40	0	0.245	0	0.0408453	CG3506
CG41099	CG41099, isoform B OS=Drosophila melanogaster GN=CG41099 PE=4 SV=1	16	0	23	0	0.199	0	17	0	34	0	0.167	0	16	0	44	0	0.186	0	0.000208117	CG41099
CG2158	CG2158 OS=Drosophila melanogaster GN=Nup50 PE=1 SV=1	17	0	24	0	0.328	0	41	5	56	5	0.571	0.046	15	7	37	19	0.255	0.147	0.0640434	CG2158
CG4153	Eukaryotic translation initiation factor 2 subunit 2 OS=Drosophila melanogaster GN=eIF-2beta PE=1 SV=1	6	0	10	0	0.157	0	17	13	31	23	0.256	0.272	15	6	35	11	0.295	0.135	0.1396	CG4153
CG5920	40S ribosomal protein S2 OS=Drosophila melanogaster GN=sop PE=1 SV=2	35	7	94	10	0.524	0.21	30	3	60	6	0.539	0.082	15	5	38	20	0.345	0.135	0.0321237	CG5920
CG9012	Clathrin heavy chain OS=Drosophila melanogaster GN=Chc PE=1 SV=1	37	0	52	0	0.29	0	27	5	38	7	0.178	0.029	15	5	24	21	0.099	0.033	0.0302171	CG9012
CG15119	LD06557p OS=Drosophila melanogaster GN=mip40 PE=1 SV=1	12	0	15	0	0.39	0	12	5	19	9	0.446	0.112	15	4	69	6	0.363	0.161	0.00411596	CG15119
CG9330	CG9330 OS=Drosophila melanogaster GN=CG9330-RA PE=1 SV=1	21	0	29	0	0.305	0	48	7	101	11	0.384	0.072	15	2	39	5	0.209	0.032	0.063753	CG9330
CG3416	26S proteasome non-ATPase regulatory subunit 7 OS=Drosophila melanogaster GN=Mov34 PE=1 SV=6	27	2	47	8	0.482	0.068	46	2	81	3	0.657	0.038	15	2	40	8	0.32	0.038	0.0469544	CG3416
CG7769	DNA damage-binding protein 1 OS=Drosophila melanogaster GN=pic PE=1 SV=1	16	0	23	0	0.213	0	45	3	84	3	0.336	0.019	15	2	30	6	0.132	0.015	0.0684129	CG7769
CG32211	Transcription initiation factor TFIID subunit 6 OS=Drosophila melanogaster GN=Taf6 PE=1 SV=2	20	0	26	0	0.417	0	29	4	49	4	0.477	0.091	15	2	36	10	0.248	0.033	0.0170475	CG32211
CG2033	40S ribosomal protein S15Aa OS=Drosophila melanogaster GN=RpS15Aa PE=2 SV=2	17	4	58	25	0.592	0.277	23	0	58	0	0.738	0	15	2	54	16	0.646	0.146	0.00493784	CG2033
CG12262	Probable medium-chain specific acyl-CoA dehydrogenase, mitochondrial OS=Drosophila melanogaster GN=CG12262 PE=1 SV=1	9	0	13	0	0.327	0	17	5	33	6	0.389	0.088	15	2	29	4	0.277	0.05	0.0114902	CG12262
CG7471	Histone deacetylase Rpd3 OS=Drosophila melanogaster GN=Rpd3 PE=1 SV=2	11	0	17	0	0.321	0	35	3	62	6	0.38	0.052	15	0	35	0	0.213	0	0.0593603	CG7471
CG2048	Discs overgrown protein kinase OS=Drosophila melanogaster GN=dco PE=1 SV=2	16	2	39	2	0.384	0.052	34	2	98	4	0.35	0.016	15	0	70	0	0.186	0	0.0397316	CG2048
CG2708	Translocase of outer membrane 34 OS=Drosophila melanogaster GN=unc-45 PE=2 SV=1	27	0	31	0	0.365	0	24	3	31	7	0.247	0.024	15	0	42	0	0.168	0	0.0108965	CG2708
CG9934	CG9934, isoform A OS=Drosophila melanogaster GN=CG9934 PE=1 SV=1	11	0	13	0	0.102	0	22	0	29	0	0.224	0	15	0	50	0	0.103	0	0.0190371	CG9934
CG3510	Isoform C of G2/mitotic-specific cyclin-B OS=Drosophila melanogaster GN=CycB	7	0	13	0	0.254	0	16	3	23	6	0.28	0.06	15	0	34	0	0.166	0	0.0212608	CG3510
CG18000	Isoform 5b of Cytoplasmic dynein 1 intermediate chain OS=Drosophila melanogaster GN=sw	10	0	10	0	0.225	0	14	0	24	0	0.282	0	15	0	42	0	0.274	0	0.0067636	CG18000
CG2031	Hpr1 OS=Drosophila melanogaster GN=Hpr1 PE=1 SV=1	21	0	36	0	0.362	0	41	4	55	5	0.411	0.049	14	6	24	15	0.133	0.064	0.0533471	CG2031
CG4003	RuvB-like helicase 1 OS=Drosophila melanogaster GN=pont PE=1 SV=1	30	5	58	12	0.596	0.125	44	10	72	22	0.596	0.112	14	4	75	15	0.191	0.07	0.0558101	CG4003
CG3661	60S ribosomal protein L23 OS=Drosophila melanogaster GN=RpL23 PE=1 SV=2	11	7	305	111	0.529	0.364	32	5	234	6	0.657	0.3	14	4	72	24	0.529	0.193	0.0852005	CG3661
CG1825	LD02709p OS=Drosophila melanogaster GN=Map60 PE=1 SV=1	14	0	24	0	0.341	0	25	0	37	0	0.461	0	14	3	31	4	0.214	0.068	0.0186846	CG1825
CG17437	Protein will die slowly OS=Drosophila melanogaster GN=wds PE=2 SV=1	14	4	19	5	0.468	0.152	16	5	23	10	0.438	0.105	14	3	21	11	0.429	0.086	0.000150376	CG17437
CG9748	ATP-dependent RNA helicase bel OS=Drosophila melanogaster GN=bel PE=1 SV=1	12	0	13	0	0.177	0	39	3	70	3	0.373	0.024	14	2	41	5	0.163	0.026	0.073265	CG9748
CG2980	THO complex subunit 5 OS=Drosophila melanogaster GN=thoc5 PE=1 SV=2	15	2	24	2	0.25	0.036	24	0	49	0	0.265	0	14	2	30	2	0.133	0.032	0.0156804	CG2980
CG18495	Proteasome subunit alpha type-6 OS=Drosophila melanogaster GN=Prosalpha1 PE=2 SV=2	13	0	13	0	0.471	0	22	0	31	0	0.5	0	14	2	24	4	0.316	0.086	0.0131755	CG18495
CG30382	Proteasome subunit alpha type OS=Drosophila melanogaster GN=CG30382 PE=3 SV=1	13	0	13	0	0.471	0	22	0	31	0	0.5	0	14	2	24	4	0.316	0.086	0.0131755	CG30382
CG9022	Dolichyl-diphosphooligosaccharide--protein glycosyltransferase 48 kDa subunit OS=Drosophila melanogaster GN=Ost48 PE=2 SV=2	11	0	14	0	0.356	0	18	6	41	10	0.332	0.1	14	2	32	19	0.332	0.024	0.00638085	CG9022
CG8211	CG8211 OS=Drosophila melanogaster GN=CG8211 PE=2 SV=2	11	0	14	0	0.137	0	48	0	95	0	0.329	0	14	0	33	0	0.11	0	0.0883779	CG8211
CG1994	Polycomb protein l(1)G0020 OS=Drosophila melanogaster GN=l(1)G0020 PE=1 SV=2	44	5	84	12	0.427	0.063	40	3	78	3	0.421	0.021	14	0	25	0	0.144	0	0.041254	CG1994
CG14299	Ectopic P granules protein 5 homolog OS=Drosophila melanogaster GN=CG14299 PE=1 SV=2	6	0	8	0	0.055	0	38	2	44	5	0.141	0.008	14	0	26	0	0.056	0	0.0955847	CG14299
CG4901	CG4901 OS=Drosophila melanogaster GN=CG4901 PE=2 SV=2	12	0	15	0	0.207	0	29	0	36	0	0.304	0	14	0	31	0	0.196	0	0.0379945	CG4901
CG15433	Probable elongator complex protein 3 OS=Drosophila melanogaster GN=Elp3 PE=2 SV=1	19	0	25	0	0.299	0	25	0	33	0	0.337	0	14	0	24	0	0.223	0	0.0130004	CG15433
CG7698	Cleavage and polyadenylation specificity factor 73 OS=Drosophila melanogaster GN=Cpsf73 PE=1 SV=2	11	0	15	0	0.212	0	24	0	34	0	0.325	0	14	0	24	0	0.178	0	0.0266529	CG7698
CG4972	CG4972 OS=Drosophila melanogaster GN=CG4972 PE=1 SV=2	17	0	24	0	0.276	0	22	3	33	3	0.319	0.034	14	0	26	0	0.127	0	0.00487992	CG4972
CG9696	Helicase domino OS=Drosophila melanogaster GN=dom PE=1 SV=2	13	0	14	0	0.058	0	20	6	26	7	0.084	0.018	14	0	21	0	0.044	0	0.00506008	CG9696
CG5330	LD21576p OS=Drosophila melanogaster GN=Nap1 PE=2 SV=1	10	0	12	0	0.214	0	20	0	26	0	0.438	0	14	0	33	0	0.27	0	0.0185431	CG5330
CG6842	BcDNA.GH02678 OS=Drosophila melanogaster GN=Vps4 PE=1 SV=1	15	0	22	0	0.342	0	19	2	52	10	0.321	0.043	14	0	27	0	0.219	0	0.00195002	CG6842
CG6453	CG6453 OS=Drosophila melanogaster GN=CG6453 PE=1 SV=1	18	0	33	0	0.458	0	18	2	41	2	0.339	0.024	14	0	50	0	0.277	0	0.000943998	CG6453
CG10392	O-glycosyltransferase OS=Drosophila melanogaster GN=sxc PE=1 SV=1	17	0	23	0	0.216	0	18	0	27	0	0.212	0	14	0	30	0	0.179	0	0.00268541	CG10392
CG1244	MEP-1, isoform A OS=Drosophila melanogaster GN=MEP-1 PE=1 SV=1	6	0	7	0	0.085	0	15	3	25	6	0.143	0.021	14	0	25	0	0.122	0	0.0258585	CG1244
CG32697	LD27988p OS=Drosophila melanogaster GN=l(1)G0232 PE=2 SV=2	6	0	7	0	0.097	0	14	0	21	0	0.191	0	14	0	24	0	0.126	0	0.0255763	CG32697
CG5436	Heat shock protein 68 OS=Drosophila melanogaster GN=Hsp68 PE=1 SV=1	7	5	18	12	0.044	0.043	7	5	38	10	0.115	0.046	13	10	36	75	0.113	0.063	0.211156	CG5436
CG10279	ATP-dependent RNA helicase p62 OS=Drosophila melanogaster GN=Rm62 PE=1 SV=3	16	3	21	7	0.238	0.05	30	7	46	11	0.362	0.074	13	6	58	12	0.186	0.083	0.0524913	CG10279
CG18212	Aluminum tubes, isoform A OS=Drosophila melanogaster GN=alt PE=1 SV=1	14	0	16	0	0.232	0	33	8	47	8	0.316	0.08	13	5	18	18	0.166	0.065	0.0627987	CG18212
CG1263	60S ribosomal protein L8 OS=Drosophila melanogaster GN=RpL8 PE=2 SV=1	17	9	35	15	0.277	0.266	19	7	30	7	0.434	0.234	13	5	32	36	0.195	0.148	0.00795108	CG1263
CG1685	Protein penguin OS=Drosophila melanogaster GN=pen PE=2 SV=1	12	0	14	0	0.199	0	27	10	35	25	0.335	0.081	13	4	40	10	0.163	0.049	0.0515803	CG1685
CG2807	CG2807 OS=Drosophila melanogaster GN=CG2807 PE=1 SV=2	11	0	14	0	0.107	0	26	3	48	3	0.206	0.013	13	4	20	9	0.123	0.031	0.0423709	CG2807
CG18332	COP9 signalosome complex subunit 3 OS=Drosophila melanogaster GN=CSN3 PE=1 SV=2	14	2	18	3	0.285	0.063	18	4	29	7	0.355	0.049	13	4	23	13	0.22	0.07	0.00401889	CG18332
CG6773	Sec13 OS=Drosophila melanogaster GN=sec13 PE=2 SV=1	6	0	7	0	0.121	0	11	0	12	0	0.216	0	13	3	35	8	0.154	0.093	0.0161642	CG6773
CG3422	Proteasome subunit alpha type-7-1 OS=Drosophila melanogaster GN=Pros28.1 PE=1 SV=2	13	2	47	2	0.514	0.104	26	0	45	0	0.55	0	13	2	30	4	0.345	0.044	0.031499	CG3422
CG9156	Serine/threonine-protein phosphatase alpha-3 isoform OS=Drosophila melanogaster GN=Pp1-13C PE=1 SV=1	14	2	35	3	0.328	0.06	21	0	32	0	0.397	0	13	2	42	11	0.219	0.063	0.0111115	CG9156
CG33106	Ankyrin repeat and KH domain-containing protein mask OS=Drosophila melanogaster GN=mask PE=1 SV=2	9	0	11	0	0.045	0	21	0	28	0	0.084	0	13	2	33	3	0.046	0.006	0.0280524	CG33106
CG3480	LD07342p OS=Drosophila melanogaster GN=mip130 PE=1 SV=3	15	0	27	0	0.155	0	20	0	28	0	0.232	0	13	2	25	2	0.123	0.025	0.00588989	CG3480
CG5271	Ubiquitin-40S ribosomal protein S27a OS=Drosophila melanogaster GN=RpS27A PE=1 SV=2	8	4	22	7	0.449	0.224	13	3	18	6	0.429	0.16	13	2	42	7	0.571	0.115	0.0136745	CG5271
CG3379;	Histone H4 OS=Drosophila melanogaster GN=His4 PE=1 SV=2	9	2	13	2	0.427	0.214	10	0	11	0	0.524	0	13	2	33	38	0.524	0.194	0.00286495	CG3379;
CG3423	LD34181p OS=Drosophila melanogaster GN=SA PE=2 SV=2	22	0	26	0	0.21	0	43	0	60	0	0.305	0	13	0	35	0	0.125	0	0.0498468	CG3423
CG12499	CG12499 OS=Drosophila melanogaster GN=CG12499 PE=1 SV=2	14	0	18	0	0.1	0	39	0	58	0	0.181	0	13	0	23	0	0.069	0	0.061285	CG12499
CG6768	DNA polymerase OS=Drosophila melanogaster GN=DNApol-epsilon PE=1 SV=3	5	0	6	0	0.051	0	31	2	47	2	0.156	0.004	13	0	29	0	0.08	0	0.0887888	CG6768
CG7008	LD20211p OS=Drosophila melanogaster GN=Tudor-SN PE=1 SV=1	29	8	32	14	0.278	0.095	26	2	40	2	0.245	0.026	13	0	23	0	0.141	0	0.0202254	CG7008
CG9433	Xeroderma pigmentosum D, isoform A OS=Drosophila melanogaster GN=Xpd PE=2 SV=1	17	0	31	0	0.32	0	26	0	34	0	0.33	0	13	0	33	0	0.177	0	0.0199451	CG9433
CG11123	CG11123 OS=Drosophila melanogaster GN=CG11123 PE=2 SV=1	15	0	24	0	0.224	0	26	0	33	0	0.341	0	13	0	23	0	0.189	0	0.023447	CG11123
CG7003	Probable DNA mismatch repair protein Msh6 OS=Drosophila melanogaster GN=Msh6 PE=1 SV=2	17	0	24	0	0.192	0	25	2	30	5	0.208	0.006	13	0	33	0	0.121	0	0.016904	CG7003
CG5505	Isoform F of Ubiquitin carboxyl-terminal hydrolase 36 OS=Drosophila melanogaster GN=scny	16	0	22	0	0.193	0	24	7	37	9	0.201	0.088	13	0	30	0	0.092	0	0.0114513	CG5505
CG9191	Bipolar kinesin KRP-130 OS=Drosophila melanogaster GN=Klp61F PE=1 SV=2	15	0	21	0	0.195	0	24	2	38	5	0.258	0.023	13	0	23	0	0.163	0	0.017317	CG9191
CG3696	KISMET-L long isoform OS=Drosophila melanogaster GN=kis PE=2 SV=3	11	0	13	0	0.035	0	23	3	34	4	0.067	0.006	13	0	17	0	0.033	0	0.025091	CG3696
CG6721	GTPase-activating protein OS=Drosophila melanogaster GN=Gap1 PE=2 SV=2	18	0	24	0	0.169	0	22	2	30	2	0.193	0.021	13	0	21	0	0.103	0	0.00882048	CG6721
CG2097	LD45768p OS=Drosophila melanogaster GN=Sym PE=1 SV=1	7	0	10	0	0.089	0	22	0	28	0	0.181	0	13	0	25	0	0.107	0	0.0423957	CG2097
CG8378	BcDNA.LD29892 OS=Drosophila melanogaster GN=BcDNA.LD29892 PE=2 SV=1	13	0	20	0	0.335	0	21	0	33	0	0.337	0	13	0	28	0	0.171	0	0.0138856	CG8378
CG7855	Timeout OS=Drosophila melanogaster GN=timeout PE=1 SV=2	4	0	4	0	0.046	0	19	0	28	0	0.124	0	13	0	29	0	0.092	0	0.0552504	CG7855
CG8454	RE66051p OS=Drosophila melanogaster GN=Vps16A PE=2 SV=1	3	0	4	0	0.042	0	19	0	34	0	0.191	0	13	0	21	0	0.174	0	0.0648059	CG8454
CG5444	Transcription initiation factor TFIID subunit 4 OS=Drosophila melanogaster GN=Taf4 PE=1 SV=1	15	2	21	5	0.161	0.026	16	6	22	7	0.219	0.035	13	0	24	0	0.14	0	0.00471711	CG5444
CG12276	Aos1 OS=Drosophila melanogaster GN=Aos1 PE=2 SV=1	14	0	24	0	0.501	0	16	3	21	4	0.516	0.098	13	0	20	0	0.404	0	0.000303623	CG12276
CG9412	AT27578p OS=Drosophila melanogaster GN=rin PE=2 SV=1	12	3	18	4	0.181	0.057	15	0	28	0	0.232	0	13	0	27	0	0.171	0	0.000408453	CG9412
CG7010	GM13002p OS=Drosophila melanogaster GN=l(1)G0334 PE=1 SV=2	15	0	23	0	0.449	0	13	4	20	4	0.358	0.095	13	0	33	0	0.268	0	0.00198992	CG7010
CG13345	Tumbleweed OS=Drosophila melanogaster GN=tum PE=4 SV=1	19	0	36	0	0.334	0	11	0	16	0	0.227	0	13	0	32	0	0.238	0	0.013495	CG13345
CG1751	Signal peptidase complex subunit 2 OS=Drosophila melanogaster GN=Spase25 PE=2 SV=1	5	0	7	0	0.286	0	10	0	17	0	0.397	0	13	0	27	0	0.402	0	0.0285955	CG1751
CG17252	BCL7-like OS=Drosophila melanogaster GN=BCL7-like PE=1 SV=1	7	0	9	0	0.643	0	8	0	12	0	0.649	0	13	0	29	0	0.286	0	0.0186701	CG17252
CG12357	Nuclear cap-binding protein subunit 2 OS=Drosophila melanogaster GN=Cbp20 PE=1 SV=1	9	2	24	6	0.494	0.156	6	0	9	0	0.227	0	13	0	25	0	0.299	0	0.0198858	CG12357
CG13389	40S ribosomal protein S13 OS=Drosophila melanogaster GN=RpS13 PE=2 SV=3	13	8	53	34	0.291	0.305	21	3	31	4	0.543	0.205	12	6	28	26	0.252	0.185	0.0286072	CG13389
CG14792	Isoform A of 40S ribosomal protein SA OS=Drosophila melanogaster GN=sta	22	5	147	14	0.696	0.237	45	5	112	6	0.826	0.163	12	5	23	33	0.433	0.13	0.0803256	CG14792
CG17521	60S ribosomal protein L10 OS=Drosophila melanogaster GN=Qm PE=2 SV=1	22	0	394	0	0.463	0	28	3	66	4	0.601	0.11	12	5	40	16	0.376	0.165	0.0252766	CG17521
CG1938	Dynein light intermediate chain, isoform A OS=Drosophila melanogaster GN=Dlic PE=2 SV=2	21	0	41	0	0.383	0	24	6	64	14	0.397	0.113	12	5	33	21	0.235	0.091	0.0163	CG1938
CG9765	Transforming acidic coiled-coil protein, isoform D OS=Drosophila melanogaster GN=tacc PE=1 SV=1	20	0	24	0	0.22	0	16	7	23	12	0.147	0.046	12	5	17	7	0.149	0.036	0.00925948	CG9765
CG7808	40S ribosomal protein S8 OS=Drosophila melanogaster GN=RpS8 PE=1 SV=1	25	10	120	112	0.562	0.365	22	3	33	4	0.572	0.062	12	4	32	44	0.404	0.168	0.024921	CG7808
CG14637	ATP-dependent RNA helicase abstrakt OS=Drosophila melanogaster GN=abs PE=1 SV=1	18	5	26	12	0.312	0.073	21	6	44	10	0.331	0.105	12	4	23	10	0.212	0.055	0.0199974	CG14637
CG10206	CG10206-PA OS=Drosophila melanogaster GN=nop5 PE=1 SV=2	36	8	68	24	0.538	0.221	36	8	53	16	0.554	0.086	12	3	27	8	0.249	0.057	0.0539728	CG10206
CG6375	Probable ATP-dependent RNA helicase pitchoune OS=Drosophila melanogaster GN=pit PE=2 SV=2	12	0	16	0	0.226	0	20	3	29	6	0.238	0.037	12	3	21	6	0.154	0.043	0.0147399	CG6375
CG2051	CG2051 OS=Drosophila melanogaster GN=CG2051 PE=2 SV=1	27	3	72	11	0.526	0.086	19	0	32	0	0.358	0	12	3	27	5	0.207	0.069	0.0254179	CG2051
CG31196	Isoform C of 14-3-3 protein epsilon OS=Drosophila melanogaster GN=14-3-3epsilon	18	0	26	0	0.539	0	6	2	11	2	0.281	0.086	12	3	43	11	0.234	0.117	0.0441666	CG31196
CG9900	Centromere/kinetochore protein zw10 OS=Drosophila melanogaster GN=mit(1)15 PE=1 SV=2	14	0	19	0	0.354	0	27	5	42	6	0.352	0.05	12	2	32	4	0.119	0.022	0.0358008	CG9900
CG8036	CG8036, isoform B OS=Drosophila melanogaster GN=CG8036 PE=1 SV=3	18	0	27	0	0.372	0	24	2	35	2	0.353	0.021	12	2	48	2	0.155	0.035	0.0182523	CG8036
CG10990	CG10990, isoform A OS=Drosophila melanogaster GN=CG10990 PE=1 SV=2	25	0	60	0	0.552	0	23	0	35	0	0.417	0	12	2	37	4	0.169	0.029	0.018968	CG10990
CG8426	LD13864p OS=Drosophila melanogaster GN=l(2)NC136 PE=1 SV=1	12	0	18	0	0.162	0	19	0	30	0	0.21	0	12	2	22	2	0.127	0.025	0.0106094	CG8426
CG18608	Non-histone chromosomal protein Prod OS=Drosophila melanogaster GN=prod PE=1 SV=1	9	0	10	0	0.332	0	18	8	25	12	0.529	0.124	12	2	20	7	0.364	0.049	0.0271919	CG18608
CG12005	GH06271p OS=Drosophila melanogaster GN=Mms19 PE=2 SV=1	18	0	25	0	0.2	0	27	0	44	0	0.266	0	12	0	18	0	0.109	0	0.0244051	CG12005
CG7538	DNA replication licensing factor Mcm2 OS=Drosophila melanogaster GN=Mcm2 PE=1 SV=1	13	0	15	0	0.218	0	27	0	41	0	0.315	0	12	0	34	0	0.156	0	0.0349723	CG7538
CG10535	Putative elongator complex protein 1 OS=Drosophila melanogaster GN=CG10535 PE=1 SV=2	6	0	9	0	0.065	0	26	0	52	0	0.221	0	12	0	23	0	0.097	0	0.0658646	CG10535
CG3885	Exocyst complex component 1 OS=Drosophila melanogaster GN=sec3 PE=1 SV=2	8	0	10	0	0.146	0	25	2	41	3	0.263	0.022	12	0	20	0	0.181	0	0.0527338	CG3885
CG4943	E3 ubiquitin-protein ligase Smurf1 OS=Drosophila melanogaster GN=lack PE=1 SV=3	13	0	18	0	0.129	0	23	5	41	8	0.211	0.06	12	0	23	0	0.151	0	0.0187602	CG4943
CG9601	CG9601 OS=Drosophila melanogaster GN=CG9601-RA PE=2 SV=2	7	0	8	0	0.132	0	23	0	30	0	0.409	0	12	0	25	0	0.245	0	0.0487782	CG9601
CG4062	Valyl-tRNA synthetase, isoform A OS=Drosophila melanogaster GN=Aats-val PE=1 SV=1	5	0	6	0	0.082	0	23	0	31	0	0.232	0	12	0	22	0	0.12	0	0.0629394	CG4062
CG5175	Kugelkern, isoform A OS=Drosophila melanogaster GN=kuk PE=1 SV=1	12	0	21	0	0.389	0	21	4	46	6	0.36	0.051	12	0	29	0	0.132	0	0.0148037	CG5175
CG7254	Glycogen phosphorylase OS=Drosophila melanogaster GN=GlyP PE=2 SV=2	14	0	17	0	0.243	0	21	2	40	2	0.232	0.014	12	0	20	0	0.142	0	0.0129978	CG7254
CG10506	Probable glutaminyl-tRNA synthetase OS=Drosophila melanogaster GN=Aats-gln PE=1 SV=1	15	0	20	0	0.26	0	21	0	31	0	0.244	0	12	0	34	0	0.174	0	0.0131355	CG10506
CG13387	Exportin-1 OS=Drosophila melanogaster GN=emb PE=1 SV=1	22	0	31	0	0.314	0	20	0	47	0	0.185	0	12	0	20	0	0.119	0	0.0138094	CG13387
CG8573	Protein suppressor of hairy wing OS=Drosophila melanogaster GN=su(Hw) PE=1 SV=2	11	0	11	0	0.089	0	19	0	35	0	0.185	0	12	0	21	0	0.137	0	0.0154133	CG8573
CG32491	Isoform 55.6 of Modifier of mdg4 OS=Drosophila melanogaster GN=mod(mdg4)	14	0	73	0	0.396	0	16	9	31	17	0.352	0.146	12	0	22	0	0.22	0	0.0262275	CG32491
CG7581	Bub3 OS=Drosophila melanogaster GN=Bub3 PE=1 SV=1	25	3	47	5	0.653	0.083	16	2	26	3	0.491	0.031	12	0	34	0	0.215	0	0.0235048	CG7581
CG12324	40S ribosomal protein S15Ab OS=Drosophila melanogaster GN=RpS15Ab PE=2 SV=3	10	3	41	16	0.462	0.2	15	0	40	0	0.554	0	12	0	43	0	0.462	0	0.00225401	CG12324
CG2941	CG2941 OS=Drosophila melanogaster GN=CG2941 PE=1 SV=2	4	0	6	0	0.057	0	15	0	25	0	0.156	0	12	0	17	0	0.15	0	0.0439203	CG2941
CG34422	CG34422, isoform A OS=Drosophila melanogaster GN=CG34422 PE=1 SV=3	9	0	13	0	0.064	0	14	2	20	4	0.087	0.013	12	0	24	0	0.081	0	0.0038825	CG34422
CG7246	CG7246 OS=Drosophila melanogaster GN=CG7246 PE=1 SV=1	9	0	10	0	0.206	0	11	0	12	0	0.163	0	12	0	26	0	0.188	0	0.00338332	CG7246
CG6335	GH22474p OS=Drosophila melanogaster GN=Aats-his PE=2 SV=1	18	0	23	0	0.345	0	9	2	12	2	0.17	0.044	12	0	22	0	0.222	0	0.0181841	CG6335
CG7664	Activator protein 4 OS=Drosophila melanogaster GN=crp PE=2 SV=1	17	0	24	0	0.326	0	9	0	14	0	0.187	0	12	0	27	0	0.252	0	0.0161493	CG7664
CG32823	Sperm-specific dynein intermediate chain 3 OS=Drosophila melanogaster GN=Sdic3 PE=2 SV=2	6	0	6	0	0.202	0	8	0	13	0	0.256	0	12	0	34	0	0.276	0	0.0195062	CG32823
CG33497	Sperm-specific dynein intermediate chain 2 OS=Drosophila melanogaster GN=Sdic2 PE=2 SV=1	8	0	8	0	0.199	0	7	0	12	0	0.215	0	12	0	32	0	0.236	0	0.0138094	CG33497
CG3936	Neurogenic locus Notch protein OS=Drosophila melanogaster GN=N PE=1 SV=3	17	0	21	0	0.104	0	6	0	12	0	0.025	0	12	0	20	0	0.056	0	0.0334577	CG3936
CG42551	La-related protein OS=Drosophila melanogaster GN=larp PE=1 SV=4	23	0	47	0	0.255	0	23	6	40	10	0.172	0.029	11	5	27	17	0.147	0.064	0.0220528	CG42551
CG7977	FI01658p OS=Drosophila melanogaster GN=RpL23A PE=2 SV=1	24	4	114	8	0.365	0.155	18	8	39	11	0.372	0.173	11	5	28	56	0.195	0.13	0.0370151	CG7977
CG10652	RE25263p OS=Drosophila melanogaster GN=RpL30 PE=2 SV=1	7	4	119	61	0.586	0.423	13	3	19	4	0.631	0.162	11	5	20	34	0.667	0.279	0.0289304	CG10652
CG6386	Nucleosomal histone kinase 1 OS=Drosophila melanogaster GN=ball PE=1 SV=1	22	2	54	2	0.334	0.037	12	4	17	9	0.194	0.037	11	5	29	18	0.18	0.092	0.0381049	CG6386
CG12304	Probable aminoacyl tRNA synthase complex-interacting multifunctional protein 2 OS=Drosophila melanogaster GN=CG12304 PE=1 SV=1	15	2	50	2	0.41	0.063	31	0	55	0	0.62	0	11	4	30	6	0.183	0.081	0.0518941	CG12304
CG4088	GH28787p OS=Drosophila melanogaster GN=lat PE=1 SV=1	20	2	23	6	0.329	0.05	40	2	54	2	0.463	0.033	11	3	25	3	0.151	0.036	0.0651522	CG4088
CG18174	26S proteasome non-ATPase regulatory subunit 14 OS=Drosophila melanogaster GN=Rpn11 PE=1 SV=1	20	4	91	10	0.471	0.14	29	0	111	0	0.607	0	11	3	21	8	0.24	0.091	0.0349511	CG18174
CG5738	Longitudinals lacking protein-like OS=Drosophila melanogaster GN=lolal PE=1 SV=1	19	2	222	3	0.512	0.22	18	3	37	8	0.52	0.205	11	3	33	29	0.346	0.268	0.0159729	CG5738
CG2038	COP9 signalosome complex subunit 7 OS=Drosophila melanogaster GN=CSN7 PE=1 SV=2	18	0	26	0	0.478	0	18	0	29	0	0.45	0	11	3	19	8	0.309	0.104	0.00677557	CG2038
CG9680	Probable ATP-dependent RNA helicase Dbp73D OS=Drosophila melanogaster GN=Dbp73D PE=2 SV=3	22	0	27	0	0.41	0	35	4	60	10	0.303	0.042	11	2	18	3	0.172	0.033	0.0463952	CG9680
CG2244	MTA1-like, isoform A OS=Drosophila melanogaster GN=MTA1-like PE=4 SV=2	11	0	14	0	0.302	0	24	3	29	3	0.298	0.03	11	2	20	2	0.157	0.031	0.0410265	CG2244
CG8439	GM12270p OS=Drosophila melanogaster GN=Cct5 PE=2 SV=1	30	0	54	0	0.613	0	32	0	54	0	0.437	0	11	0	20	0	0.153	0	0.0340004	CG8439
CG9209	GH13542p OS=Drosophila melanogaster GN=vap PE=2 SV=2	6	0	9	0	0.11	0	32	0	51	0	0.295	0	11	0	28	0	0.15	0	0.0883951	CG9209
CG5794	Ubiquitin carboxyl-terminal hydrolase OS=Drosophila melanogaster GN=CG5794 PE=2 SV=2	4	0	6	0	0.027	0	32	0	42	0	0.1	0	11	0	15	0	0.037	0	0.101809	CG5794
CG1594	Tyrosine-protein kinase hopscotch OS=Drosophila melanogaster GN=hop PE=1 SV=2	2	0	6	0	0.035	0	31	2	48	2	0.297	0.019	11	0	26	0	0.113	0	0.121728	CG1594
CG7261	CG7261 OS=Drosophila melanogaster GN=CG7261 PE=2 SV=1	10	0	14	0	0.115	0	27	5	40	6	0.194	0.025	11	0	13	0	0.093	0	0.0555758	CG7261
CG6975	Gigas OS=Drosophila melanogaster GN=gig PE=2 SV=1	5	0	5	0	0.032	0	27	0	42	0	0.175	0	11	0	21	0	0.048	0	0.080363	CG6975
CG7935	D-Importin 7/RanBP7 OS=Drosophila melanogaster GN=msk PE=2 SV=1	21	0	32	0	0.28	0	23	3	30	3	0.194	0.019	11	0	40	0	0.119	0	0.0177257	CG7935
CG6677	Absent, small, or homeotic discs 2, isoform D OS=Drosophila melanogaster GN=ash2 PE=2 SV=3	17	0	31	0	0.371	0	23	0	32	0	0.33	0	11	0	27	0	0.173	0	0.0195516	CG6677
CG4215	DNA mismatch repair protein spellchecker 1 OS=Drosophila melanogaster GN=spel1 PE=3 SV=4	20	0	29	0	0.237	0	22	5	32	9	0.237	0.036	11	0	20	0	0.097	0	0.012679	CG4215
CG10315	LD05345p OS=Drosophila melanogaster GN=eIF2B-delta PE=1 SV=1	13	0	18	0	0.334	0	22	2	37	4	0.353	0.032	11	0	16	0	0.228	0	0.022357	CG10315
CG2917	LD43280p OS=Drosophila melanogaster GN=Orc4 PE=2 SV=1	12	0	14	0	0.227	0	22	0	34	0	0.32	0	11	0	20	0	0.235	0	0.0253418	CG2917
CG6876	CG6876 OS=Drosophila melanogaster GN=Prp31 PE=1 SV=1	20	0	32	0	0.449	0	21	0	32	0	0.293	0	11	0	23	0	0.164	0	0.0160225	CG6876
CG10938	Proteasome subunit alpha type-5 OS=Drosophila melanogaster GN=Prosalpha5 PE=1 SV=2	13	0	28	0	0.529	0	21	0	52	0	0.561	0	11	0	29	0	0.32	0	0.0195334	CG10938
CG31453	LD24646p OS=Drosophila melanogaster GN=pch2 PE=1 SV=1	12	0	25	0	0.295	0	21	0	38	0	0.292	0	11	0	36	0	0.242	0	0.021965	CG31453
CG7439	Protein argonaute-2 OS=Drosophila melanogaster GN=AGO2 PE=1 SV=3	29	0	36	0	0.226	0	18	0	23	0	0.181	0	11	0	24	0	0.087	0	0.0331075	CG7439
CG11980	CG11980, isoform A OS=Drosophila melanogaster GN=CG11980 PE=2 SV=2	12	0	15	0	0.391	0	17	2	26	2	0.336	0.029	11	0	17	0	0.272	0	0.00644113	CG11980
CG2671	Lethal(2) giant larvae protein OS=Drosophila melanogaster GN=l(2)gl PE=1 SV=2	9	0	10	0	0.108	0	16	3	22	3	0.151	0.026	11	0	25	0	0.121	0	0.0096596	CG2671
CG7483	eIF4AIII OS=Drosophila melanogaster GN=eIF4AIII PE=1 SV=1	6	0	13	0	0.148	0	16	3	22	6	0.388	0.058	11	0	26	0	0.246	0	0.0306787	CG7483
CG4976	Probable histone-lysine N-methyltransferase Mes-4 OS=Drosophila melanogaster GN=Mes-4 PE=1 SV=2	6	0	6	0	0.088	0	16	0	22	0	0.121	0	11	0	17	0	0.098	0	0.0312424	CG4976
CG4078	Regulator of telomere elongation helicase 1 homolog OS=Drosophila melanogaster GN=CG4078 PE=1 SV=1	16	0	18	0	0.164	0	14	0	23	0	0.168	0	11	0	18	0	0.12	0	0.00555735	CG4078
CG8548	FI03727p OS=Drosophila melanogaster GN=Kap-alpha1 PE=1 SV=1	10	0	12	0	0.366	0	13	3	22	7	0.247	0.044	11	0	18	0	0.192	0	0.000795388	CG8548
CG32786	CG32786 OS=Drosophila melanogaster GN=CG32786 PE=2 SV=1	2	0	2	0	0.018	0	13	0	21	0	0.131	0	11	0	16	0	0.134	0	0.0622672	CG32786
CG40129	G protein-coupled receptor kinase 1 OS=Drosophila melanogaster GN=Gprk1 PE=1 SV=2	9	0	15	0	0.187	0	12	0	16	0	0.166	0	11	0	18	0	0.137	0	0.00338332	CG40129
CG17331	Proteasome subunit beta type OS=Drosophila melanogaster GN=CG17331 PE=1 SV=1	13	0	24	0	0.478	0	7	0	13	0	0.393	0	11	0	26	0	0.299	0	0.0139609	CG17331
CG4464	40S ribosomal protein S19a OS=Drosophila melanogaster GN=RpS19a PE=2 SV=3	11	3	14	7	0.378	0.192	25	8	47	17	0.692	0.288	10	8	36	42	0.385	0.237	0.0982478	CG4464
CG7726	60S ribosomal protein L11 OS=Drosophila melanogaster GN=RpL11 PE=1 SV=2	28	4	354	47	0.734	0.13	16	9	29	42	0.467	0.201	10	6	24	44	0.315	0.234	0.075267	CG7726
CG7014	40S ribosomal protein S5b OS=Drosophila melanogaster GN=RpS5b PE=2 SV=1	5	0	58	0	0.27	0	14	3	27	12	0.352	0.074	10	5	25	12	0.27	0.148	0.0483627	CG7014
CG12323	Proteasome subunit beta type OS=Drosophila melanogaster GN=Prosbeta5 PE=1 SV=1	10	0	13	0	0.234	0	15	3	20	4	0.294	0.131	10	4	31	14	0.167	0.16	0.00652099	CG12323
CG7757	CG7757, isoform A OS=Drosophila melanogaster GN=CG7757 PE=1 SV=1	16	0	24	0	0.298	0	25	0	31	0	0.426	0	10	3	17	6	0.144	0.048	0.0301616	CG7757
CG9075	Eukaryotic initiation factor 4A OS=Drosophila melanogaster GN=eIF-4a PE=2 SV=3	23	3	40	5	0.484	0.082	17	4	21	8	0.402	0.057	10	3	22	10	0.171	0.069	0.0349568	CG9075
CG5519	BcDNA.LD02793 OS=Drosophila melanogaster GN=Prp19 PE=1 SV=1	14	0	21	0	0.285	0	9	5	11	13	0.297	0.071	10	3	26	12	0.152	0.038	0.00842963	CG5519
CG32164	CG32164 OS=Drosophila melanogaster GN=CG32164 PE=4 SV=2	25	0	42	0	0.277	0	38	0	57	0	0.291	0	10	2	16	2	0.108	0.017	0.0493461	CG32164
CG32165	CG32165 OS=Drosophila melanogaster GN=CG32165 PE=4 SV=2	23	0	39	0	0.22	0	38	0	57	0	0.291	0	10	2	16	2	0.108	0.017	0.051834	CG32165
CG1911	Condensin complex subunit 1 OS=Drosophila melanogaster GN=CAP-D2 PE=1 SV=1	13	0	18	0	0.167	0	32	2	47	2	0.229	0.007	10	2	14	5	0.07	0.014	0.0655292	CG1911
CG3989	Multifunctional protein ADE2 OS=Drosophila melanogaster GN=ade5 PE=1 SV=2	5	0	6	0	0.152	0	27	3	38	4	0.357	0.049	10	2	21	9	0.135	0.049	0.101712	CG3989
CG16928	Endo/exonuclease Mre11 OS=Drosophila melanogaster GN=mre11 PE=1 SV=1	14	0	16	0	0.269	0	20	2	30	2	0.281	0.031	10	2	19	4	0.194	0.032	0.0192937	CG16928
CG14476	BcDNA.GH04962 OS=Drosophila melanogaster GN=BcDNA.GH04962 PE=2 SV=1	12	0	15	0	0.172	0	39	0	55	0	0.28	0	10	0	15	0	0.128	0	0.0808525	CG14476
CG9735	FI06027p OS=Drosophila melanogaster GN=Aats-trp PE=2 SV=1	22	0	39	0	0.395	0	32	2	43	2	0.486	0.04	10	0	22	0	0.209	0	0.0407482	CG9735
CG9282	60S ribosomal protein L24 OS=Drosophila melanogaster GN=RpL24 PE=1 SV=1	14	4	176	183	0.413	0.206	32	2	63	6	0.568	0.116	10	0	22	0	0.335	0	0.0644907	CG9282
CG6349	DNA polymerase alpha catalytic subunit OS=Drosophila melanogaster GN=DNApol-alpha180 PE=1 SV=2	25	0	27	0	0.208	0	27	0	34	0	0.163	0	10	0	14	0	0.077	0	0.0306262	CG6349
CG6535	Serine/threonine-protein kinase ATM OS=Drosophila melanogaster GN=tefu PE=2 SV=1	15	0	16	0	0.085	0	27	0	34	0	0.096	0	10	0	16	0	0.043	0	0.0376271	CG6535
CG8151	General transcription factor IIH subunit 1 OS=Drosophila melanogaster GN=Tfb1 PE=1 SV=1	23	0	32	0	0.383	0	24	0	37	0	0.338	0	10	0	19	0	0.231	0	0.0259865	CG8151
CG7704	Transcription initiation factor TFIID subunit 5 OS=Drosophila melanogaster GN=Taf5 PE=1 SV=1	8	0	11	0	0.169	0	24	0	33	0	0.32	0	10	0	14	0	0.141	0	0.0542998	CG7704
CG7154	CG7154 OS=Drosophila melanogaster GN=CG7154 PE=1 SV=1	9	0	11	0	0.154	0	23	3	34	8	0.271	0.035	10	0	16	0	0.137	0	0.0479198	CG7154
CG6904	Putative glycogen [starch] synthase OS=Drosophila melanogaster GN=CG6904 PE=1 SV=2	12	0	18	0	0.228	0	22	2	44	4	0.257	0.014	10	0	23	0	0.171	0	0.0297414	CG6904
CG6322	CG6322 OS=Drosophila melanogaster GN=U4-U6-60K PE=1 SV=1	17	0	26	0	0.282	0	21	0	31	0	0.336	0	10	0	27	0	0.192	0	0.0190371	CG6322
CG9556	COP9 signalosome complex subunit 2 OS=Drosophila melanogaster GN=alien PE=1 SV=2	8	0	12	0	0.309	0	20	2	33	3	0.279	0.018	10	0	20	0	0.2	0	0.0397315	CG9556
CG17704	Nipped-B protein OS=Drosophila melanogaster GN=Nipped-B PE=1 SV=3	9	0	12	0	0.091	0	19	4	31	4	0.102	0.02	10	0	19	0	0.064	0	0.0271165	CG17704
CG5370	Caspase-1 OS=Drosophila melanogaster GN=Dcp-1 PE=1 SV=1	6	0	10	0	0.269	0	18	2	34	2	0.545	0.022	10	0	19	0	0.22	0	0.0446864	CG5370
CG11596	UPF0586 protein CG11596 OS=Drosophila melanogaster GN=CG11596 PE=1 SV=1	13	0	17	0	0.255	0	18	0	31	0	0.435	0	10	0	42	0	0.178	0	0.0139669	CG11596
CG4904	Proteasome subunit alpha type-1 OS=Drosophila melanogaster GN=Pros35 PE=1 SV=1	15	2	31	5	0.52	0.093	16	0	23	0	0.52	0	10	0	23	0	0.258	0	0.00605213	CG4904
CG17603	Isoform C of Transcription initiation factor TFIID subunit 1 OS=Drosophila melanogaster GN=Taf1	16	0	18	0	0.095	0	15	4	18	8	0.071	0.011	10	0	17	0	0.052	0	0.00374533	CG17603
CG43736	CG33691, isoform B OS=Drosophila melanogaster GN=CG4564 PE=2 SV=2	17	0	27	0	0.313	0	14	0	18	0	0.24	0	10	0	18	0	0.151	0	0.0106548	CG43736
CG3957	HL01517p OS=Drosophila melanogaster GN=wmd PE=2 SV=1	6	0	7	0	0.259	0	14	0	16	0	0.375	0	10	0	17	0	0.271	0	0.0247068	CG3957
CG3902	CG3902 OS=Drosophila melanogaster GN=CG3902-RA PE=2 SV=1	12	0	16	0	0.435	0	13	0	30	0	0.287	0	10	0	16	0	0.249	0	0.00283288	CG3902
CG7109	Serine/threonine-protein phosphatase PP2A OS=Drosophila melanogaster GN=mts PE=2 SV=1	9	0	12	0	0.269	0	13	0	18	0	0.362	0	10	0	19	0	0.33	0	0.00622928	CG7109
CG7034	Exocyst complex component 6 OS=Drosophila melanogaster GN=sec15 PE=1 SV=1	3	0	3	0	0.082	0	12	0	18	0	0.142	0	10	0	18	0	0.097	0	0.0462787	CG7034
CG5684	GH06247p OS=Drosophila melanogaster GN=Pop2 PE=2 SV=2	4	0	5	0	0.185	0	11	0	21	0	0.441	0	10	0	16	0	0.323	0	0.0312134	CG5684
CG32783	CG32783 OS=Drosophila melanogaster GN=CG32783 PE=2 SV=1	2	0	2	0	0.018	0	10	0	16	0	0.097	0	10	0	15	0	0.117	0	0.0553514	CG32783
CG11979	RE34924p OS=Drosophila melanogaster GN=Rpb5 PE=2 SV=1	9	0	18	0	0.443	0	9	0	12	0	0.438	0	10	0	23	0	0.362	0	0.000636537	CG11979
CG6998	Dynein light chain 1, cytoplasmic OS=Drosophila melanogaster GN=ctp PE=1 SV=1	14	2	23	2	0.517	0.337	8	0	11	0	0.64	0	10	0	33	0	0.371	0	0.00966285	CG6998
CG10417	Probable protein phosphatase CG10417 OS=Drosophila melanogaster GN=CG10417 PE=1 SV=1	5	0	9	0	0.175	0	6	0	15	0	0.107	0	10	0	15	0	0.166	0	0.0222335	CG10417
CG4800	Translationally-controlled tumor protein homolog OS=Drosophila melanogaster GN=Tctp PE=1 SV=1	7	0	8	0	0.517	0	5	2	6	4	0.308	0.134	10	0	23	0	0.401	0	0.0142811	CG4800
CG10423	Ribosomal protein S27 OS=Drosophila melanogaster GN=RpS27 PE=2 SV=1	11	0	48	0	0.405	0	16	3	27	6	0.417	0.25	9	2	44	10	0.25	0.226	0.0123424	CG10423
CG1519	Proteasome subunit alpha type-3 OS=Drosophila melanogaster GN=Prosalpha7 PE=1 SV=1	5	0	7	0	0.19	0	15	5	27	7	0.455	0.13	9	2	20	7	0.241	0.067	0.0554924	CG1519
CG7831	Protein claret segregational OS=Drosophila melanogaster GN=ncd PE=1 SV=1	20	0	47	0	0.367	0	13	4	22	8	0.181	0.046	9	2	14	5	0.123	0.027	0.0258382	CG7831
CG6384	Centrosome-associated zinc finger protein CP190 OS=Drosophila melanogaster GN=Cp190 PE=1 SV=2	23	0	33	0	0.336	0	12	7	28	7	0.193	0.071	9	2	13	7	0.094	0.024	0.0467165	CG6384
CG4063	F-box-like/WD repeat-containing protein ebi OS=Drosophila melanogaster GN=ebi PE=1 SV=2	6	0	7	0	0.146	0	12	2	17	3	0.191	0.026	9	2	27	2	0.159	0.053	0.0171245	CG4063
CG1666	Helicase OS=Drosophila melanogaster GN=Hlc PE=2 SV=2	17	0	20	0	0.314	0	10	0	14	0	0.212	0	9	2	17	2	0.159	0.041	0.0192359	CG1666
CG1957	Probable cleavage and polyadenylation specificity factor subunit 2 OS=Drosophila melanogaster GN=Cpsf100 PE=1 SV=1	13	0	18	0	0.198	0	33	6	44	8	0.384	0.087	9	0	19	0	0.136	0	0.0756429	CG1957
CG7546	CG7546, isoform A OS=Drosophila melanogaster GN=CG7546 PE=1 SV=2	13	0	15	0	0.18	0	30	2	59	2	0.215	0.017	9	0	37	0	0.099	0	0.0604507	CG7546
CG16944	Isoform A of ADP,ATP carrier protein OS=Drosophila melanogaster GN=sesB	7	0	8	0	0.254	0	29	3	39	3	0.605	0.074	9	0	21	0	0.278	0	0.0910983	CG16944
CG1120	CG1120 OS=Drosophila melanogaster GN=CG1120 PE=1 SV=1	9	0	10	0	0.19	0	22	0	40	0	0.328	0	9	0	17	0	0.13	0	0.0456891	CG1120
CG10289	CG10289 OS=Drosophila melanogaster GN=CG10289 PE=1 SV=2	14	0	20	0	0.234	0	21	0	25	0	0.235	0	9	0	16	0	0.101	0	0.0259765	CG10289
CG11399	CG11399 OS=Drosophila melanogaster GN=CG11399 PE=2 SV=1	10	0	12	0	0.13	0	21	0	34	0	0.183	0	9	0	15	0	0.1	0	0.0370073	CG11399
CG9769	Eukaryotic translation initiation factor 3 subunit F-1 OS=Drosophila melanogaster GN=eIF3-S5-1 PE=2 SV=1	9	0	26	0	0.339	0	19	0	33	0	0.386	0	9	0	26	0	0.279	0	0.0329534	CG9769
CG1109	CG1109, isoform A OS=Drosophila melanogaster GN=CG1109 PE=1 SV=2	14	0	17	0	0.201	0	18	5	32	5	0.182	0.032	9	0	23	0	0.124	0	0.0120374	CG1109
CG5166	Ataxin-2 homolog OS=Drosophila melanogaster GN=Atx2 PE=1 SV=1	11	0	17	0	0.183	0	18	0	32	0	0.182	0	9	0	17	0	0.115	0	0.0217003	CG5166
CG8190	eIF2B-gamma OS=Drosophila melanogaster GN=eIF2B-gamma PE=1 SV=1	10	0	13	0	0.29	0	18	0	24	0	0.319	0	9	0	24	0	0.215	0	0.0247026	CG8190
CG17266	Peptidyl-prolyl cis-trans isomerase OS=Drosophila melanogaster GN=CG17266 PE=1 SV=1	7	0	13	0	0.65	0	16	0	28	0	0.601	0	9	0	28	0	0.383	0	0.0298183	CG17266
CG12233	Probable isocitrate dehydrogenase [NAD] subunit alpha, mitochondrial OS=Drosophila melanogaster GN=l(1)G0156 PE=2 SV=1	14	0	25	0	0.329	0	15	3	34	3	0.488	0.05	9	0	22	0	0.265	0	0.00546416	CG12233
CG12217	Serine/threonine-protein phosphatase 6 catalytic subunit OS=Drosophila melanogaster GN=PpV PE=2 SV=1	6	2	7	4	0.254	0.069	15	0	20	0	0.436	0	9	0	15	0	0.277	0	0.0320158	CG12217
CG12238	Supporter of activation of yellow protein OS=Drosophila melanogaster GN=e(y)3 PE=2 SV=3	10	0	11	0	0.049	0	14	0	28	0	0.088	0	9	0	17	0	0.049	0	0.00937165	CG12238
CG8583	RE14391p OS=Drosophila melanogaster GN=sec63 PE=1 SV=1	7	0	8	0	0.084	0	13	2	22	2	0.15	0.035	9	0	14	0	0.166	0	0.0124102	CG8583
CG5149	CG5149, isoform B OS=Drosophila melanogaster GN=CG5149 PE=4 SV=1	2	0	2	0	0.062	0	13	0	22	0	0.31	0	9	0	12	0	0.194	0	0.0652859	CG5149
CG11228	Serine/threonine-protein kinase hippo OS=Drosophila melanogaster GN=hpo PE=1 SV=1	13	0	17	0	0.266	0	12	2	16	2	0.155	0.016	9	0	21	0	0.111	0	0.00192371	CG11228
CG1258	FI03252p OS=Drosophila melanogaster GN=pav PE=1 SV=1	29	0	40	0	0.328	0	11	0	15	0	0.109	0	9	0	22	0	0.107	0	0.0620109	CG1258
CG12101	60 kDa heat shock protein, mitochondrial OS=Drosophila melanogaster GN=Hsp60 PE=1 SV=3	12	0	15	0	0.393	0	11	0	14	0	0.185	0	9	0	13	0	0.185	0	0.00338332	CG12101
CG1569	Rough deal OS=Drosophila melanogaster GN=rod PE=2 SV=2	12	0	15	0	0.092	0	11	0	19	0	0.057	0	9	0	14	0	0.052	0	0.00338332	CG1569
CG6195	AT06125p OS=Drosophila melanogaster GN=CG6195 PE=1 SV=1	13	0	16	0	0.433	0	9	3	12	5	0.215	0.066	9	0	15	0	0.187	0	0.00311514	CG6195
CG18001	60S ribosomal protein L38 OS=Drosophila melanogaster GN=RpL38 PE=2 SV=1	7	0	18	0	0.429	0	9	0	26	0	0.314	0	9	0	32	0	0.314	0	0.0031696	CG18001
CG30118	CG30118, isoform B OS=Drosophila melanogaster GN=CG30118 PE=4 SV=1	20	0	28	0	0.414	0	8	2	10	2	0.2	0.034	9	0	11	0	0.189	0	0.0447366	CG30118
CG10042	MBD-R2, isoform B OS=Drosophila melanogaster GN=MBD-R2 PE=1 SV=2	16	0	20	0	0.251	0	8	0	12	0	0.103	0	9	0	14	0	0.085	0	0.0242803	CG10042
CG7843	Serrate RNA effector molecule homolog OS=Drosophila melanogaster GN=Ars2 PE=1 SV=2	8	0	8	0	0.103	0	7	5	10	7	0.097	0.055	9	0	14	0	0.089	0	0.025179	CG7843
CG10542	E3 ubiquitin-protein ligase Bre1 OS=Drosophila melanogaster GN=Bre1 PE=1 SV=2	15	0	15	0	0.179	0	7	0	9	0	0.08	0	9	0	16	0	0.087	0	0.0250402	CG10542
CG9580	Sperm-specific dynein intermediate chain 1 OS=Drosophila melanogaster GN=Sdic PE=1 SV=2	7	0	7	0	0.205	0	7	0	13	0	0.199	0	9	0	30	0	0.221	0	0.00373837	CG9580
CG4897	60S ribosomal protein L7 OS=Drosophila melanogaster GN=RpL7 PE=2 SV=2	18	10	71	37	0.536	0.329	17	3	24	3	0.397	0.083	8	5	14	38	0.206	0.107	0.0521365	CG4897
CG4651	60S ribosomal protein L13 OS=Drosophila melanogaster GN=RpL13 PE=1 SV=1	13	10	16	175	0.413	0.234	16	4	26	5	0.404	0.128	8	5	14	18	0.349	0.128	0.059017	CG4651
CG2469	CG2469, isoform A OS=Drosophila melanogaster GN=CG2469 PE=1 SV=1	12	0	13	0	0.143	0	12	2	14	2	0.102	0.006	8	5	16	8	0.051	0.039	0.00681257	CG2469
CG6510	60S ribosomal protein L18a OS=Drosophila melanogaster GN=RpL18A PE=1 SV=1	16	8	147	91	0.458	0.345	11	0	20	0	0.311	0	8	5	11	21	0.294	0.266	0.0451886	CG6510
CG8922	40S ribosomal protein S5a OS=Drosophila melanogaster GN=RpS5a PE=1 SV=1	6	0	11	0	0.219	0	11	3	20	12	0.268	0.075	8	4	18	10	0.18	0.114	0.0175677	CG8922
CG2099	RE17737p OS=Drosophila melanogaster GN=RpL35A PE=2 SV=1	12	5	151	7	0.401	0.261	11	0	18	0	0.357	0	8	4	15	9	0.255	0.146	0.0107782	CG2099
CG15442	60S ribosomal protein L27a OS=Drosophila melanogaster GN=RpL27A PE=2 SV=2	10	6	74	21	0.369	0.235	8	0	14	0	0.309	0	8	4	19	25	0.195	0.107	0.0398378	CG15442
CG8725	COP9 signalosome complex subunit 4 OS=Drosophila melanogaster GN=CSN4 PE=1 SV=1	24	0	34	0	0.558	0	27	0	44	0	0.491	0	8	3	14	7	0.179	0.071	0.0415255	CG8725
CG1064	GH08712p OS=Drosophila melanogaster GN=Snr1 PE=1 SV=2	21	0	25	0	0.586	0	19	0	31	0	0.459	0	8	3	16	7	0.259	0.057	0.0290628	CG1064
CG2746	60S ribosomal protein L19 OS=Drosophila melanogaster GN=RpL19 PE=1 SV=2	14	4	120	320	0.33	0.128	14	2	17	3	0.286	0.034	8	3	19	13	0.256	0.143	0.0187094	CG2746
CG3163	CG3163 OS=Drosophila melanogaster GN=CG3163 PE=1 SV=2	6	0	7	0	0.147	0	10	4	14	9	0.361	0.057	8	3	14	7	0.212	0.09	0.0136727	CG3163
CG7839	CG7839 OS=Drosophila melanogaster GN=CG7839 PE=1 SV=3	12	0	13	0	0.103	0	28	4	37	9	0.175	0.032	8	2	9	5	0.09	0.018	0.0723564	CG7839
CG5162	CG5162 OS=Drosophila melanogaster GN=CG5162 PE=2 SV=1	7	0	13	0	0.277	0	27	3	48	4	0.543	0.051	8	2	11	3	0.209	0.049	0.0982966	CG5162
CG4869	Beta-Tubulin at 97EF, isoform B OS=Drosophila melanogaster GN=betaTub97EF PE=2 SV=1	12	4	398	21	0.284	0.092	26	0	107	0	0.287	0	8	2	121	27	0.116	0.037	0.0644977	CG4869
CG5859	CG5859 OS=Drosophila melanogaster GN=CG5859-RA PE=2 SV=1	11	0	14	0	0.164	0	19	2	29	3	0.17	0.012	8	2	11	8	0.068	0.02	0.0346302	CG5859
CG7878	CG7878 OS=Drosophila melanogaster GN=CG7878 PE=1 SV=1	8	0	10	0	0.185	0	16	2	27	3	0.248	0.013	8	2	11	2	0.097	0.026	0.0325674	CG7878
CG4399	Enhanced adult sensory threshold OS=Drosophila melanogaster GN=east PE=2 SV=1	4	0	5	0	0.025	0	9	2	15	3	0.043	0.018	8	2	16	2	0.045	0.013	0.0243923	CG4399
CG4654	Isoform B of Transcription factor Dp OS=Drosophila melanogaster GN=Dp	8	0	11	0	0.252	0	7	0	10	0	0.172	0	8	2	13	4	0.181	0.061	0.00138568	CG4654
CG18273	CG18273 OS=Drosophila melanogaster GN=CG18273 PE=2 SV=3	17	0	24	0	0.174	0	27	0	44	0	0.2	0	8	0	12	0	0.052	0	0.0436489	CG18273
CG7833	Origin recognition complex subunit 5 OS=Drosophila melanogaster GN=Orc5 PE=2 SV=1	14	0	17	0	0.396	0	26	4	38	5	0.346	0.072	8	0	17	0	0.211	0	0.0507036	CG7833
CG4097	Proteasome subunit beta type-1 OS=Drosophila melanogaster GN=Pros26 PE=1 SV=2	23	3	35	4	0.621	0.123	26	0	46	0	0.66	0	8	0	16	0	0.196	0	0.0397315	CG4097
CG9936	Mediator of RNA polymerase II transcription subunit 13 OS=Drosophila melanogaster GN=skd PE=1 SV=1	8	0	8	0	0.036	0	26	0	39	0	0.147	0	8	0	23	0	0.04	0	0.0724069	CG9936
CG16940	CG16940, isoform A OS=Drosophila melanogaster GN=CG16940 PE=2 SV=2	10	0	11	0	0.084	0	25	3	42	7	0.206	0.018	8	0	16	0	0.093	0	0.0631949	CG16940
CG8233	Reduction in Cnn dots 1, isoform C OS=Drosophila melanogaster GN=Rcd1 PE=4 SV=1	5	0	6	0	0.074	0	23	4	38	5	0.277	0.032	8	0	17	0	0.156	0	0.095149	CG8233
CG3697	DNA repair endonuclease XPF OS=Drosophila melanogaster GN=mei-9 PE=1 SV=2	8	0	11	0	0.097	0	23	2	36	5	0.219	0.012	8	0	11	0	0.08	0	0.0650414	CG3697
CG9842	Serine/threonine-protein phosphatase 2B catalytic subunit 2 OS=Drosophila melanogaster GN=Pp2B-14D PE=1 SV=2	6	0	6	0	0.098	0	23	2	39	3	0.3	0.035	8	0	17	0	0.139	0	0.079878	CG9842
CG1856	Protein tramtrack, beta isoform OS=Drosophila melanogaster GN=ttk PE=1 SV=2	22	0	42	0	0.384	0	23	0	30	0	0.306	0	8	0	15	0	0.16	0	0.0337945	CG1856
CG6189	Lethal (1) 1Bi OS=Drosophila melanogaster GN=l(1)1Bi PE=2 SV=1	23	0	28	0	0.224	0	22	0	27	0	0.137	0	8	0	19	0	0.048	0	0.0337945	CG6189
CG8843	Exocyst complex component 2 OS=Drosophila melanogaster GN=sec5 PE=1 SV=1	4	0	5	0	0.077	0	21	2	35	2	0.226	0.015	8	0	15	0	0.087	0	0.0898756	CG8843
CG34408	CG34408, isoform A OS=Drosophila melanogaster GN=CG34408-RA PE=2 SV=3	5	0	5	0	0.042	0	20	0	27	0	0.159	0	8	0	18	0	0.055	0	0.0692068	CG34408
CG12737	Calmodulin-binding protein related to a Rab3 GDP/GTP exchange protein, isoform A OS=Drosophila melanogaster GN=Crag PE=2 SV=3	5	0	5	0	0.041	0	19	2	30	2	0.132	0.008	8	0	15	0	0.05	0	0.0700364	CG12737
CG14224	LD38919p OS=Drosophila melanogaster GN=Ubqn PE=1 SV=1	13	0	14	0	0.32	0	19	0	22	0	0.353	0	8	0	27	0	0.165	0	0.0262206	CG14224
CG5033	Ribosome biogenesis protein BOP1 homolog OS=Drosophila melanogaster GN=CG5033 PE=1 SV=1	14	0	18	0	0.111	0	17	4	22	4	0.19	0.036	8	0	11	0	0.128	0	0.015003	CG5033
CG2925	Splicing factor 3A subunit 3 OS=Drosophila melanogaster GN=noi PE=1 SV=1	12	0	17	0	0.27	0	17	4	36	5	0.245	0.052	8	0	14	0	0.141	0	0.0166119	CG2925
CG11271	40S ribosomal protein S12 OS=Drosophila melanogaster GN=RpS12 PE=2 SV=2	4	0	6	0	0.281	0	17	2	20	10	0.446	0.094	8	0	19	0	0.475	0	0.0701377	CG11271
CG3041	Origin recognition complex subunit 2 OS=Drosophila melanogaster GN=Orc2 PE=1 SV=2	8	0	9	0	0.149	0	16	3	23	12	0.264	0.036	8	0	17	0	0.139	0	0.0271397	CG3041
CG8384	Protein groucho OS=Drosophila melanogaster GN=gro PE=1 SV=3	18	0	40	0	0.299	0	16	0	28	0	0.238	0	8	0	30	0	0.153	0	0.0222335	CG8384
CG5336	Ced-12 OS=Drosophila melanogaster GN=Ced-12 PE=2 SV=1	11	0	16	0	0.193	0	16	0	25	0	0.191	0	8	0	12	0	0.12	0	0.0188748	CG5336
CG10060	Guanine nucleotide-binding protein G(i) subunit alpha 65A OS=Drosophila melanogaster GN=G-ialpha65A PE=1 SV=2	8	0	8	0	0.208	0	16	0	21	0	0.473	0	8	0	18	0	0.29	0	0.0285955	CG10060
CG9086	E3 ubiquitin-protein ligase UBR1 OS=Drosophila melanogaster GN=UBR1 PE=2 SV=2	5	0	6	0	0.058	0	16	0	21	0	0.09	0	8	0	19	0	0.05	0	0.0492893	CG9086
CG3688	mRNA cap guanine-N7 methyltransferase OS=Drosophila melanogaster GN=l(2)35Bd PE=1 SV=2	11	0	14	0	0.295	0	15	4	23	4	0.351	0.077	8	0	14	0	0.23	0	0.00980645	CG3688
CG11376	CG11376 OS=Drosophila melanogaster GN=CG11376 PE=1 SV=2	15	0	22	0	0.127	0	15	2	25	4	0.098	0.012	8	0	16	0	0.058	0	0.0140973	CG11376
CG14884	COP9 signalosome complex subunit 5 OS=Drosophila melanogaster GN=CSN5 PE=1 SV=1	18	0	27	0	0.572	0	15	0	26	0	0.453	0	8	0	14	0	0.266	0	0.0219614	CG14884
CG9300	CG9300 OS=Drosophila melanogaster GN=CG9300 PE=2 SV=1	10	0	12	0	0.235	0	14	4	18	5	0.146	0.03	8	0	19	0	0.132	0	0.00782889	CG9300
CG12749	Heterogeneous nuclear ribonucleoprotein 87F OS=Drosophila melanogaster GN=Hrb87F PE=1 SV=2	6	0	7	0	0.158	0	14	2	27	2	0.205	0.031	8	0	29	0	0.171	0	0.0300015	CG12749
CG3025	Males-absent on the first protein OS=Drosophila melanogaster GN=mof PE=1 SV=1	4	0	4	0	0.059	0	13	2	21	2	0.184	0.016	8	0	16	0	0.122	0	0.0452088	CG3025
CG5252	LP08082p OS=Drosophila melanogaster GN=Ranbp9 PE=1 SV=1	19	0	24	0	0.276	0	13	0	23	0	0.169	0	8	0	21	0	0.091	0	0.0262206	CG5252
CG32210	E3 ubiquitin-protein ligase listerin OS=Drosophila melanogaster GN=l(3)76BDr PE=1 SV=2	6	0	8	0	0.042	0	13	0	18	0	0.08	0	8	0	16	0	0.046	0	0.0247775	CG32210
CG12359	GH15225p OS=Drosophila melanogaster GN=Ulp1 PE=2 SV=1	12	0	13	0	0.088	0	12	0	18	0	0.071	0	8	0	10	0	0.061	0	0.00763404	CG12359
CG12298	Kinesin-like protein subito OS=Drosophila melanogaster GN=sub PE=1 SV=1	7	0	9	0	0.161	0	11	2	17	2	0.186	0.032	8	0	11	0	0.131	0	0.00450671	CG12298
CG4035	Eukaryotic translation initiation factor 4E OS=Drosophila melanogaster GN=eIF-4E PE=1 SV=1	12	0	17	0	0.537	0	10	0	27	0	0.293	0	8	0	19	0	0.166	0	0.00653623	CG4035
CG44436	Protein strawberry notch OS=Drosophila melanogaster GN=sno PE=1 SV=1	19	0	22	0	0.134	0	9	5	13	5	0.049	0.033	8	0	14	0	0.051	0	0.0402518	CG44436
CG6439	CG6439, isoform A OS=Drosophila melanogaster GN=CG6439 PE=1 SV=1	9	0	10	0	0.33	0	9	3	20	3	0.316	0.068	8	0	15	0	0.214	0	0.00519722	CG6439
CG13425	Bancal, isoform E OS=Drosophila melanogaster GN=bl PE=4 SV=1	10	0	12	0	0.235	0	9	0	11	0	0.195	0	8	0	14	0	0.183	0	0.002045	CG13425
CG42232	CG42232 OS=Drosophila melanogaster GN=CG42232 PE=4 SV=1	21	0	25	0	0.101	0	8	2	10	3	0.027	0.008	8	0	19	0	0.034	0	0.0557345	CG42232
CG12141	Lysyl-tRNA synthetase OS=Drosophila melanogaster GN=Aats-lys PE=2 SV=2	27	0	72	0	0.405	0	7	0	16	0	0.107	0	8	0	15	0	0.124	0	0.0821671	CG12141
CG4616	CG4616, isoform A OS=Drosophila melanogaster GN=FLASH PE=1 SV=1	23	0	32	0	0.359	0	7	0	8	0	0.06	0	8	0	14	0	0.123	0	0.0670622	CG4616
CG8443	Protein KIAA0664 homolog OS=Drosophila melanogaster GN=CG8443 PE=1 SV=1	12	0	17	0	0.128	0	7	0	10	0	0.066	0	8	0	15	0	0.069	0	0.0138094	CG8443
CG2358	GM04682p OS=Drosophila melanogaster GN=twr PE=2 SV=1	5	0	5	0	0.324	0	6	0	9	0	0.335	0	8	0	20	0	0.389	0	0.00942211	CG2358
CG2252	Homeotic protein female sterile OS=Drosophila melanogaster GN=fs(1)h PE=1 SV=2	8	0	15	0	0.056	0	5	0	7	0	0.028	0	8	0	14	0	0.067	0	0.00990197	CG2252
CG5670	Sodium/potassium-transporting ATPase subunit alpha OS=Drosophila melanogaster GN=Atpalpha PE=1 SV=3	4	0	4	0	0.032	0	5	0	5	0	0.058	0	8	0	18	0	0.046	0	0.0210793	CG5670
CG7756	Heat shock 70 kDa protein cognate 2 OS=Drosophila melanogaster GN=Hsc70-2 PE=1 SV=2	5	3	8	6	0.033	0.039	3	0	26	0	0.051	0	7	5	21	31	0.058	0.041	0.140143	CG7756
CG11183	Decapping protein 1, isoform A OS=Drosophila melanogaster GN=Dcp1 PE=1 SV=1	15	2	22	5	0.481	0.075	10	5	14	5	0.317	0.118	7	4	16	11	0.247	0.124	0.0404904	CG11183
CG3335	CG3335 OS=Drosophila melanogaster GN=CG3335 PE=2 SV=1	2	0	2	0	0.027	0	21	2	33	2	0.239	0.011	7	3	16	4	0.108	0.047	0.139569	CG3335
CG1091	CG1091, isoform B OS=Drosophila melanogaster GN=CG1091 PE=1 SV=1	17	6	19	12	0.327	0.111	20	0	27	0	0.359	0	7	3	10	5	0.145	0.048	0.0400392	CG1091
CG7041	FI06908p OS=Drosophila melanogaster GN=HP1b PE=1 SV=1	10	0	22	0	0.346	0	17	0	28	0	0.442	0	7	3	15	11	0.3	0.117	0.0304727	CG7041
CG6253	60S ribosomal protein L14 OS=Drosophila melanogaster GN=RpL14 PE=2 SV=1	14	8	224	357	0.464	0.319	16	0	36	0	0.572	0	7	3	19	22	0.259	0.108	0.0373869	CG6253
CG5971	Cdc6 OS=Drosophila melanogaster GN=Cdc6 PE=1 SV=1	24	0	41	0	0.406	0	25	3	41	6	0.301	0.042	7	2	8	5	0.104	0.033	0.0486878	CG5971
CG3203	60S ribosomal protein L17 OS=Drosophila melanogaster GN=RpL17 PE=1 SV=1	18	2	76	15	0.489	0.134	15	0	31	0	0.366	0	7	2	21	3	0.296	0.134	0.0310449	CG3203
CG17820	Female-specific independent of transformer OS=Drosophila melanogaster GN=fit PE=1 SV=1	6	0	15	0	0.207	0	12	2	13	3	0.529	0.083	7	2	18	11	0.198	0.083	0.0252648	CG17820
CG1216	AT10158p OS=Drosophila melanogaster GN=mri PE=1 SV=1	5	0	9	0	0.118	0	8	0	18	0	0.178	0	7	2	16	3	0.185	0.036	0.00342662	CG1216
CG8793	Lethal (3) 76BDm OS=Drosophila melanogaster GN=l(3)76BDm PE=1 SV=2	4	0	5	0	0.067	0	38	2	54	3	0.249	0.011	7	0	13	0	0.062	0	0.142971	CG8793
CG4261	Helicase 89B OS=Drosophila melanogaster GN=Hel89B PE=4 SV=3	8	0	13	0	0.056	0	37	0	66	0	0.215	0	7	0	10	0	0.047	0	0.110068	CG4261
CG4065	N-alpha-acetyltransferase, 35 NatC auxiliary subunit homolog OS=Drosophila melanogaster GN=CG4065 PE=1 SV=1	10	0	12	0	0.172	0	25	0	36	0	0.276	0	7	0	14	0	0.087	0	0.064199	CG4065
CG17766	CG17766 OS=Drosophila melanogaster GN=Rbcn-3B PE=2 SV=1	4	0	6	0	0.042	0	24	0	33	0	0.193	0	7	0	15	0	0.044	0	0.100931	CG17766
CG1559	Regulator of nonsense transcripts 1 homolog OS=Drosophila melanogaster GN=Upf1 PE=1 SV=2	18	0	21	0	0.196	0	22	0	30	0	0.178	0	7	0	11	0	0.066	0	0.0365351	CG1559
CG10602	CG10602, isoform B OS=Drosophila melanogaster GN=CG10602 PE=2 SV=1	24	0	44	0	0.511	0	19	0	28	0	0.364	0	7	0	16	0	0.199	0	0.0403355	CG10602
CG1578	CG1578 OS=Drosophila melanogaster GN=CG1578 PE=1 SV=1	15	0	20	0	0.245	0	19	0	26	0	0.191	0	7	0	12	0	0.081	0	0.0303153	CG1578
CG12230	Vacuolar protein sorting-associated protein 33A OS=Drosophila melanogaster GN=car PE=1 SV=1	10	0	11	0	0.183	0	19	0	24	0	0.219	0	7	0	19	0	0.118	0	0.039821	CG12230
CG42574	CG42574 OS=Drosophila melanogaster GN=CG42574 PE=1 SV=4	11	0	11	0	0.065	0	18	2	25	2	0.076	0.009	7	0	10	0	0.029	0	0.0331668	CG42574
CG9738	MAP kinase kinase 4, isoform A OS=Drosophila melanogaster GN=Mkk4 PE=1 SV=1	14	0	25	0	0.46	0	18	0	45	0	0.351	0	7	0	17	0	0.167	0	0.0280262	CG9738
CG3756	CG3756 OS=Drosophila melanogaster GN=CG3756 PE=1 SV=1	16	0	22	0	0.447	0	17	5	24	8	0.396	0.057	7	0	14	0	0.141	0	0.0235074	CG3756
CG9953	CG9953 OS=Drosophila melanogaster GN=CG9953 PE=2 SV=1	15	0	23	0	0.406	0	17	0	30	0	0.285	0	7	0	28	0	0.098	0	0.025518	CG9953
CG5083	RE32990p OS=Drosophila melanogaster GN=Rbf2 PE=1 SV=1	4	0	4	0	0.032	0	17	0	25	0	0.212	0	7	0	13	0	0.097	0	0.0703985	CG5083
CG2199	Isoform A of Zinc finger protein CG2199 OS=Drosophila melanogaster GN=CG2199	23	0	25	0	0.327	0	15	3	20	10	0.169	0.035	7	0	12	0	0.098	0	0.043829	CG2199
CG3004	Protein LST8 homolog OS=Drosophila melanogaster GN=CG3004 PE=2 SV=2	15	0	15	0	0.588	0	15	0	21	0	0.415	0	7	0	10	0	0.115	0	0.0218537	CG3004
CG18319	Ubiquitin-conjugating enzyme E2 N OS=Drosophila melanogaster GN=ben PE=2 SV=1	10	0	16	0	0.523	0	15	0	28	0	0.576	0	7	0	16	0	0.444	0	0.0223349	CG18319
CG5728	CG5728 OS=Drosophila melanogaster GN=CG5728 PE=1 SV=2	8	0	8	0	0.084	0	14	2	20	3	0.121	0.018	7	0	15	0	0.065	0	0.0221659	CG5728
CG32067	Simjang, isoform A OS=Drosophila melanogaster GN=simj PE=1 SV=1	7	0	8	0	0.087	0	14	2	18	2	0.2	0.024	7	0	16	0	0.071	0	0.0280306	CG32067
CG15793	Dual specificity mitogen-activated protein kinase kinase dSOR1 OS=Drosophila melanogaster GN=Dsor1 PE=2 SV=2	7	0	8	0	0.268	0	14	0	23	0	0.336	0	7	0	14	0	0.189	0	0.0285955	CG15793
CG32438	Smc5, isoform E OS=Drosophila melanogaster GN=Smc5 PE=4 SV=3	9	0	11	0	0.134	0	13	0	14	0	0.145	0	7	0	20	0	0.084	0	0.0158591	CG32438
CG10539	P70s6k protein kinase homolog OS=Drosophila melanogaster GN=S6k PE=2 SV=2	4	0	6	0	0.127	0	13	0	20	0	0.182	0	7	0	29	0	0.141	0	0.0470892	CG10539
CG14215	Protein ELYS homolog OS=Drosophila melanogaster GN=CG14215 PE=1 SV=2	12	0	14	0	0.094	0	12	4	14	4	0.08	0.018	7	0	11	0	0.036	0	0.00746038	CG14215
CG11396	CG11396 OS=Drosophila melanogaster GN=CG11396 PE=2 SV=2	9	0	9	0	0.229	0	12	0	19	0	0.308	0	7	0	14	0	0.118	0	0.0116939	CG11396
CG14804	Vacuolar protein sorting-associated protein 26 OS=Drosophila melanogaster GN=Vps26 PE=2 SV=1	4	0	5	0	0.107	0	12	0	17	0	0.232	0	7	0	15	0	0.174	0	0.0407342	CG14804
CG5341	Exocyst complex component 3 OS=Drosophila melanogaster GN=sec6 PE=1 SV=2	4	0	7	0	0.061	0	12	0	14	0	0.156	0	7	0	16	0	0.084	0	0.0407342	CG5341
CG15845	Transcription factor Adf-1 OS=Drosophila melanogaster GN=Adf1 PE=1 SV=2	9	0	33	0	0.233	0	11	3	14	4	0.202	0.076	7	0	9	0	0.221	0	0.00335769	CG15845
CG6147	LD23779p OS=Drosophila melanogaster GN=Tsc1 PE=2 SV=1	8	0	12	0	0.089	0	11	2	18	2	0.102	0.012	7	0	8	0	0.075	0	0.00450671	CG6147
CG4798	Uridine kinase OS=Drosophila melanogaster GN=l(2)k01209 PE=1 SV=1	2	0	3	0	0.048	0	11	2	25	2	0.244	0.037	7	0	14	0	0.123	0	0.0702063	CG4798
CG11006	CG11006, isoform A OS=Drosophila melanogaster GN=Sap130 PE=2 SV=1	8	0	10	0	0.105	0	11	0	13	0	0.134	0	7	0	14	0	0.088	0	0.00934662	CG11006
CG11844	Vig2, isoform B OS=Drosophila melanogaster GN=vig2 PE=1 SV=2	20	3	66	6	0.449	0.077	10	2	18	3	0.196	0.041	7	0	13	0	0.16	0	0.0533767	CG11844
CG15693	40S ribosomal protein S20 OS=Drosophila melanogaster GN=RpS20 PE=1 SV=1	4	0	9	0	0.1	0	10	2	27	51	0.375	0.275	7	0	20	0	0.158	0	0.0263881	CG15693
CG12559	Isoform C of Mitogen-activated protein kinase ERK-A OS=Drosophila melanogaster GN=rl	7	0	7	0	0.223	0	10	0	15	0	0.316	0	7	0	16	0	0.154	0	0.00763404	CG12559
CG8203	Cyclin-dependent kinase 5 homolog OS=Drosophila melanogaster GN=Cdk5 PE=1 SV=2	7	0	8	0	0.259	0	10	0	10	0	0.456	0	7	0	10	0	0.197	0	0.00763404	CG8203
CG9539	DSec61alpha OS=Drosophila melanogaster GN=Sec61alpha PE=2 SV=1	7	0	12	0	0.111	0	10	0	16	0	0.2	0	7	0	15	0	0.128	0	0.00763404	CG9539
CG18009	TATA box binding protein-related factor 2, isoform E OS=Drosophila melanogaster GN=Trf2 PE=2 SV=1	8	0	16	0	0.041	0	9	0	15	0	0.041	0	7	0	8	0	0.041	0	0.002584	CG18009
CG2034	Anon-i1 protein OS=Drosophila melanogaster GN=anon-i1 PE=1 SV=1	9	0	10	0	0.24	0	8	2	10	3	0.191	0.042	7	0	27	0	0.187	0	0.000623345	CG2034
CG4975	CG4975, isoform A OS=Drosophila melanogaster GN=CG4975 PE=4 SV=1	2	0	2	0	0.114	0	8	0	11	0	0.344	0	7	0	12	0	0.179	0	0.0463036	CG4975
CG5482	CG5482 OS=Drosophila melanogaster GN=CG5482 PE=1 SV=1	14	0	20	0	0.403	0	7	0	10	0	0.113	0	7	0	12	0	0.191	0	0.0285955	CG5482
CG2990	CG2990, isoform B OS=Drosophila melanogaster GN=CG2990-RB PE=2 SV=1	5	0	5	0	0.075	0	7	0	9	0	0.067	0	7	0	14	0	0.068	0	0.00544975	CG2990
CG2960	Ubiquitin-60S ribosomal protein L40 OS=Drosophila melanogaster GN=RpL40 PE=1 SV=2	3	0	8	0	0.297	0	6	4	6	14	0.359	0.273	7	0	28	0	0.367	0	0.0452484	CG2960
CG11624	Polyubiquitin OS=Drosophila melanogaster GN=Ubi-p63E PE=3 SV=1	3	0	12	0	0.05	0	5	3	7	6	0.045	0.033	7	0	35	0	0.062	0	0.030051	CG11624
CG32744	GH17761p OS=Drosophila melanogaster GN=Ubi-p5E PE=1 SV=3	3	0	10	0	0.071	0	5	3	6	6	0.064	0.047	7	0	30	0	0.088	0	0.030051	CG32744
CG6692	Cathepsin L OS=Drosophila melanogaster GN=Cp1 PE=1 SV=2	11	0	19	0	0.31	0	5	2	5	2	0.1	0.032	7	0	15	0	0.229	0	0.0221414	CG6692
CG7945	CG7945, isoform A OS=Drosophila melanogaster GN=CG7945 PE=2 SV=1	15	0	25	0	0.469	0	5	0	9	0	0.191	0	7	0	22	0	0.271	0	0.0492481	CG7945
CG7456	Conserved oligomeric Golgi complex subunit 4 OS=Drosophila melanogaster GN=CG7456 PE=1 SV=1	5	0	6	0	0.14	0	5	0	6	0	0.104	0	7	0	10	0	0.104	0	0.00677997	CG7456
CG42236	Isoform C of Ran-binding proteins 9/10 homolog OS=Drosophila melanogaster GN=RanBPM	4	0	4	0	0.13	0	5	0	5	0	0.109	0	7	0	19	0	0.105	0	0.0131355	CG42236
CG2604	AT14148p OS=Drosophila melanogaster GN=CG2604 PE=2 SV=1	2	0	2	0	0.112	0	5	0	5	0	0.081	0	7	0	10	0	0.216	0	0.0423957	CG2604
CG11522	RE08669p OS=Drosophila melanogaster GN=RpL6 PE=2 SV=1	26	7	116	15	0.385	0.115	16	10	31	23	0.302	0.134	6	5	12	23	0.145	0.103	0.134682	CG11522
CG32435	CLIP-associating protein OS=Drosophila melanogaster GN=chb PE=1 SV=1	12	0	18	0	0.123	0	26	2	41	2	0.174	0.01	6	4	7	9	0.045	0.025	0.0808589	CG32435
CG7137	Ribosomal RNA-processing protein 8 OS=Drosophila melanogaster GN=CG7137 PE=1 SV=1	17	2	19	2	0.321	0.081	14	3	20	5	0.383	0.095	6	3	8	14	0.168	0.095	0.0485481	CG7137
CG3314	60S ribosomal protein L7a OS=Drosophila melanogaster GN=RpL7A PE=2 SV=2	13	3	30	32	0.258	0.114	13	3	23	5	0.354	0.085	6	3	12	22	0.177	0.085	0.0407342	CG3314
CG1821	60S ribosomal protein L31 OS=Drosophila melanogaster GN=RpL31 PE=1 SV=1	9	2	29	3	0.484	0.177	11	4	19	4	0.452	0.137	6	3	13	11	0.484	0.137	0.0225642	CG1821
CG18729	Protein zwilch OS=Drosophila melanogaster GN=zwilch PE=1 SV=1	20	0	29	0	0.354	0	20	2	26	2	0.295	0.016	6	2	8	8	0.095	0.028	0.0463036	CG18729
CG8186	V-type proton ATPase subunit D 1 OS=Drosophila melanogaster GN=Vha36-1 PE=1 SV=1	10	0	13	0	0.386	0	18	2	31	2	0.496	0.041	6	2	10	3	0.272	0.085	0.0501983	CG8186
CG14478	CG14478, isoform A OS=Drosophila melanogaster GN=BEST:LD13441 PE=1 SV=1	7	0	8	0	0.176	0	18	2	27	3	0.295	0.025	6	2	19	2	0.164	0.053	0.0701377	CG14478
CG6311	Enhancer of mRNA-decapping protein 3 OS=Drosophila melanogaster GN=Edc3 PE=1 SV=1	8	0	12	0	0.215	0	16	3	26	3	0.287	0.051	6	2	9	4	0.074	0.037	0.0512656	CG6311
[truncated: 532 more rows]

## Sheet: present in all probes p<0.05
		Peptide count	Peptide count	Spectral count	Spectral count	Seqcov	Seqcov	Peptide count	Peptide count	Spectral count	Spectral count	Seqcov	Seqcov	Peptide count	Peptide count	Spectral count	Spectral count	Seqcov	Seqcov
[truncated: 904 more rows]
